# Supplementary material for: An Amharic sexually explicit content detection model using fine-tuned bidirectional encoder representation from transformers and explainable artificial intelligence
Source: PeerJ journal article supplement (doi:10.7717/peerj-cs.3529), 2026-01-30
Supplement: harashment.xlsx [file harashment.xlsx]

## Sheet: Sheet1
comments	label
ዋው ምን አይነት እይታ ነው ይህንን ቀኑን ሙሉ በየቀኑ ባየው እመኛለሁ	1
የሚያምር እይታ ፍጹም ፍጹም ቲቲዎች ቆንጆ አካል እና የሚያምር እምስ	1
እምስዎ በጣም ጣፋጭ ይመስላል	1
ምርጥ ነው ዋው በጣም ሴሰኛ ነሽ ዋው	1
ሁለቱንም ቆንጆ ጉድጓዶችህን ብበላ ደስ ይለኛል	1
እንዴት ያለ የፍትወት ምስል ነው ጎረቤት ያለሽ ምርጥ ሴት ነሽ ፊትህን እያየሁ ያንን እምሴ መብላት እፈልጋለሁ	1
ወንድ እና ሴት ልጃገረድ በአናባብቅሽ በህይወት ጉባዔው በጣም የምታዋህጂ ከሚገባ	1
ብልት በምላስ	1
እግዚአብሔር ሆይ እነዚያ ጡቶችሽ ፊትሽን እንደሚወርሩ ይቁጠሩ	1
ታላቅ የጡት ገንዘብ የጎደለውን	1
መልካም የጡት ጫፎች ጋር ካየኋቸው ምርጥ ጥንዶች አንቺ ነሽ	1
ጥሩ ጡቶች	1
ቆንጆ የጡት ጫፎች አሉሽ	1
ራቁትሽን በመለጠፍሽ እኔም ደስ ይለኛል	1
አምላኬ እነዚያን የጡት ጫፎች እወዳለሁ	1
ኢየሱስ እነዚያ የጡት ጫፎች ጨለማ ናቸው	1
ራቁትነትሽ እየተለጠፈ የሚያስደስት ወጣት ሬዲተር	1
ሙያሽን ራቁትነት በመለጠፍ አደጋ ላይ ልትጥዪ ነው?	1
በጣም ቆንጆ	1
እሷ በጣም ጥሩ ነች	1
ዋው እጅግ በጣም ፍጹም ነሽ	1
የቦምብ ጡቶች	1
እየጨመሩ የሚሄዱ ጡቶችሽን ማየት አልችልም	1
ራቁትነትሽን እያየ የሚደሰት ወጣት ነኝ	1
ቆንጆ ሴት ቆንጆ ነሽ	1
ራቁትሽን በመለጠፍ የተደሰትሽ ወጣት የፋይናንስ ሰራተኛ	1
አምላኬ እነዚያን የጡት ጫፎች አንዳንዶች መጣጣም አለባቸው	1
ሴሰኛ ሐኪም በጣም በጣም በጣም እናመሰግናለን ጡቶች በእርግጠኝነት ፍጹም ናቸው ስኳር ቆይ እና እባክሽ መለጠፍሽን ቀጥይ	1
ብልህነት እና ውበት ለዚህ ነው ብዙ ጥላቻ የምታገኙት	1
ጡቶችሽ በጣም ቆንጆ ናቸው	1
ጡቶችሽ ድንቅ ናቸው አምላኬ	1
ጡቶችሽ ፍጹም ናቸው እስክትረጭ ድረስ የጡት ጫፎችሽን እየጠባሁ እንዲነቃቁልሽ ማድረግ እፈልጋለሁ	1
ጡቶቻቸውን የሚገዙ ሐኪሞች ሁል ጊዜ ያሳያሉ	1
እነዚያ የጡት ጫፎች አስደናቂ ናቸው	1
እዚህ ሥራ ላይ ተቀምጬ በአንቺ ላይ ሴሰኛ ነገሮችን እየሰራሁ በቤቴ አለመገኘቴ አልወድም	1
ስለማጥናትስለ መስራት ፋንታ ከአንቺ አጠገብ በአልጋ ላይ መተኛት ለምን አልችልም?	1
በኋላ ማታ ላስደንቅሽ አሰብኩ እንደሚዋጥልሽ እገምታለሁ	1
ዛሬ ማታ ሶስት ወይም ከዚያ በታች ልብሶችን መልበስ ከነበረብኝ ለእኔ ምን ትመርጪልኛለሽ?	1
ባለፈው አንድ ሰዓት ስለአንቺ እያሰብኩ በአልጋ ላይ ተዘርግቼ ነበር ምን እያደረግሁ እንደነበረ ገምት	1
ማዕድ ላይ ፍቅርሽን ለመፍጠር ቦታ እንዲሆን ዛሬ ኩሽናውን አፅድቻለሁ	1
ሰውነትሽ በትንሽ ጥቁር ቀሚስሽ ድንቅ እንደሚመስለው ሁሉ በእነዚያ ላብ ሱሪዎችሽም እንዲሁ አስደናቂ ይመስላል	1
ጸጉርሽን መጫወት እና እወዳለሁ	1
የጀርባ ማሸትየእግር ማሸት ወይስ ሁለቱንም ትፈልጊያለሽ?	1
ሙዚቃ ልለቅቀው እችል ነበር ነገር ግን የፍትወት የለሽ እንጉርጉሮሽን ድምፅ ማፈን አልፈልግም	1
ከተቀሰቀሽ በኋላ አታስቆሚኝዛሬ አስደሳች ስሜት እንዲሰማሽ እቅድ ስላለኝ	1
በሰውነትሽ ላይ ያለውን እያንዳንዱን ክፍል ለመሳም መጠበቅ አልቻልኩም	1
ጠዋት ስትነቂ ምላሴ በጉያሽ መሀል ቢሆን ግድ ይልሻል?	1
አእምሮሽ ልክ እንደጠባብ ሰውነትሽ ሴሰኛ ነው	1
የሰውነትሽን የትኛውን ክፍል የበለጠ እንደሚጣፍጥ መወሰን አልቻልኩም ሌላ ቅምሻ ስጪኝ	1
አንዳንድ የእጅ ማጥበቂያ እና የፊት መሸፈኛ ገዛሁ ላንቺ ወይስ ለኔ ልጠቀምባቸው?	1
እየበላሁሽ እንድትበይ አንዳንድ ጣፋጭ ነገር ጋግሬልሻለሁ	1
ከምፈትሽው ገላ መታጠቢያ ወይስ አልጋ ላይ ወሲብ መፈጸም ትፈልጊያለሽ?	1
ዛሬ ማታ ስለ ደስታ እና ስቃይ ይሆናል	1
እዛ ሞቃትና ጣፍጭ ስሜት ስሰጥሽ ጆሮዬ ላይ የሚወጣውን አተነፋፈስሽን መስማት እፈልጋለሁ	1
ዛሬ ማታ እስክነግርሽ ድረስ ደስታሽ ከፍታ ላይ እንዲደርስ አይፈቀድልሽም	1
ዛሬ ማታ ካበቃሁልሽ በኋላ መነቃነቅ አትችዪም	1
ዛሬ ማታ ልብሽ ሙሉ ደስታ ይሞላዋል	1
ውብ ፊትሽን ከማሰብ ዲኬዬ ቀኑን ሙሉ ሲቆም ቆይቷል	1
ከእርጥብነትሽ በላይ ሳቅሽ ያስደስተኛል	1
ልብሶችሽን ወደ ማጠቢያው ጣልኳቸው እና አሁን ከላይሽ ልብጠባጠብ ነው	1
የሰዎችን እየሳምኩ በጣም ተናድጄ አላውቅም	1
ቁርስ በአልጋ ላይ ወይስ በቃል አቅርብልሽ እንድቀሰቅስሽ ትፈልጊያለሽ?	1
በኋላ ላይ ሳገኝሽ እያሰብኩ በጣም ተናድጃለሁ	1
ክንዶችሽን ከኔ ዙሪያ ማግኘት ናፍቆኛል	1
በዚህ ጠዋት በሻወር ውስጥ ሳስብሽ ነበር	1
እኔን መግዛችሁ ናፍቆኛል	1
ስንሳሳም ከላዬ ላይ ስትቆሚ የሚያሳብድኝ ነገር አለ	1
መኝታ ክፍሉን አስተካክያለሁነገር ግን አንቺ ከእኔ ጋር አንሶላዎቹን ብታበላሺ ግድ አይለኝም	1
በአንቺ ላይ እወርድብሻለሁእናም ሞገስ ስለመመለስ እንኳን እንዳታስቢ እፈቅድልሽም	1
አንቺ በአጠገቤ መሆን በጣም ናፍቆኛል	1
ዛሬ ጠዋት በአልጋ ላይ ሳስብሽ እና ስምሽን እስከ ትልቁ ድረስ ስጠራ ነበር	1
በደስታ ስታደናግሪኝ በጣም ናፈቅሽኝ	1
ያንን ሴሰኛ ጥፍሮችሽን በጀርባዬ ላይ ስትተክይ ከፍተኛ ደስታ ላይ እንድትደርሺ በጆሮሽ ውስጥ ሹክ እልሻለሁ	1
ምንም ያህል ቀዝቃዛ ሻወር ብወስድአሁንም ከአእምሮዬ ማስወገድ አልችልም	1
አንድ በአንቺ ላይ ፍቅር ያደረበት ሰው አውቃለሁ	1
እርጥበታማለስላሳ እና ስስ ቆዳሽ ከእኔ ጋር መገናኘቱ ያስደስተኛል	1
ቀኔን ስምሽን ጮክ ብዬ በመጥራት መጀመር እወዳለሁ	1
ዛሬ በጣም ጥሩ ትመስያለሽ እና እንዴት አውቃለሁ? ምክንያቱም በየቀኑ በጣም ጥሩ ትመስያለሽ	1
አይኔን በዘጋሁ ቁጥር ራቁትሽን ነው የማየው ነገር ግን ለማሳወቅ ያህል በአይኔ ክፍት ሆኖ ማየት የበለጠ እፈልጋለሁ	1
ሄይየዱር ነገር አንቺን እያሰብኩ ነበር እና ደሜ ሁሉ ወደ ደቡብ ተጓዘ	1
ባለፈው ምሽት ምን እንዳለምኩሽ ማመን አትችዪም የእሳት አደጋ ተከላካይ ነበርኩ እና አንቺ በእሳት ላይ ነበርሽ እንደ እድል ሆኖ በእሳት ቱቦዬ አዳንኩሽ ግን በጣም አርጥብጬሻለሁ	1
ወደ ቤትሽ እንደመጣሽ በግድግዳው ላይ መቸብቸብ የምፈልገው ያህል ነው ምንም ቃል የለም ያ መጥፎ ሰው ያደርገኛል?	1
የምትፈልጊውን ነገር አውቃለሁነገር ግን ለሱ እንድትለምኚኝ ነው የምፈልገው	1
እዚህ ከእኔ ጋር ብትኖሩ ኖሮ ልብሶችሽን ቀድጄ በአልጋዬ ላይ እጥልሽ ነበር እናም ባንቺ ላይ በሆነው ነገር ሁሉ እዝናና ነበር	1
በዚህ የአጽናፈ ዓለም ክፍል ውስጥ እጅግ ሞቃታማ ሴት እንደሆንሽ እርግጠኛ ነኝ	1
ቀንሽን ስለአንቺ እያሰብኩ እና ሌሊቴን ደግሞ ስለአንቺ እያለምኩ እንዳሳልፍ ታውቂያለሽ?	1
በጣም ብዙ አማራጮች አሉ የትኛውን ትመርጫለሽ? መኪናው? ሶፋው? ወለሉ? የወጥ ቤት ጠረጴዛው?	1
ዛሬ ማታ በቀስታ እወስድብሻለሁ እናም በእያንዳንዱ ጣፋጭ አካልሽ ላይ እዝናናለሁ	1
ላንቺ በጣም ብዙ ነኝ እስካሁን ቢሆንም በእያንዳንዱ አስደናቂ ክፍል ይበልጥ እየተሻሻለ እና እየተሻሻለ መጥቷል	1
እንደዚህ አይነት ከንፈሮች ለምንም አልተሰጠሽም ተረከዝ አድርጊአንዳንድ ቀይ ሊፕስቲክ ተቀቢ እና በደንብ እንጠቀምባቸው?	1
ያንን እንደገና እና እንደገና መቅመስ የማስበው ይህንን ብቻ ነው	1
ጥቂት ለስላሳ ገመድ ለመግዛት እያሰብኩ ነበር የእጅ አንጓዎችሽን እና ቁርጭምጭሚቶችሽን ለማሰር በቂ መግዛት አለብኝ ወይስ የእጅ አንጓዎችሽን ብቻ?	1
አንተ ማፈሪያ የከሀዲ ልጅ አሁንም ታወራለህ የባንዳ ልጅ ባንዳ ነው ሁሌ ባንዳ መሆን አይደብራችሁም ግን	1
አንተን ባንዳ ካለህ ዘንዳ እሱን ምን እንበለው ወራዳ ምላሱን ነበር	1
ኸረ አንተ ልጅ ቆላህ	1
ሌባ የት አባህ ነበርክ እድሜ ላብይ የናፈቀህን አገር አሳየህ ቀዳዳ	1
በይፋ ልመና ጀመርክ ፎጣ ዘርጋ	1
አሁንስ ሄኖክ አበዛኸውጎጠኛ	1
እሱስ የወንድ ብልት አልቆረጠም ምነው ባዶ ጭንቂው ላይ አላረግም	1
ተዴ እንደተ አይነት ወላ ቀር ደቆሮች ወረኞች ስራ ስሩ ሰርተን እንለወጥ ወሬ ሀብት አይሆን እራስን መሆን ብልህነት ነው ከሚለው አንጻር ደደደደደደደደ ብብብብብብብብ ናቹ	1
ያንን ሊጥ እንኳን ጭፍን የፈለግሽውን በይው ልደቱ ክደቱ ወዳንቺም ተጋብቶ ደጋፊ ኖሮት አያውቅም አልሽ እኮ የተሞተው ደዴሳ ለአዞ የተጣለው የተጣለው የ አዲስ አበባ ወጣት እና ህዝብስ ይሄ የሊበን እና የዘሙን የጅል ተረትሽን እዛው	1
አስገዳዩ አብይ ገዳዩ ያዘዘ ጀነራል አደም ገዳይ ተብየው ተራ ወታደር ይህ ሀቅ ይታወቃል ለሁሉም ቀን ይጠብቅ አሁን ያሉ የቀድሞ የፌደራል የትግራይ ተወላጅ ሰራዊቶች አለመንቃታቸው እና ወደ ትግራይ አለመመለሳቸው ግን ይሰማኛል	1
ውሀ ቢወቅጡት እምቦጭ ነው ያንተ ነገር	1
ፈይሳ አዱኛ ይማርህ አተ ውሸታም	1
ከአንተ እጅ የማይገባ ነገር የለ ቀዳዳ	1
ጀበሉ መስኪድ ሚያቃጥለው በውስጡ ቁርአን እንዳለ ረስቶ ይሁን አየህ ስትቀደድ ለማወቅ በዚህች ደረጃ ብቻ ማስተዋል በቂ ነው ከጀበሉ ራስ ወረድ በሉልን	1
አሀ የተቃጠለው መስጂድና የአላህ ቁርአን ላንተ ምንም አይደለምነገር ግን ሙስሊሙ ማህበረሰብ እየደረሰበት ያለውን ግፍና በደል ያውም ሰላማዊ በሆነ ሰልፍ እንዳይገልጽ የሚደረገው ርብርብ ምነው እሳቱን ለማጥፋት ይህን ያህል ብትጥርለማንኛውም የሙስሊሙን ያህል የሚያንገበግባቸው የወሎ ቄሶችና ክርስቲያን ወንድሞች ስላሉ ይህ ምላሽ ላንተና ለመሰሎችህ መሀይማን ብቻ ነው	1
አለቅልቅ አንተ	1
ለሚገባው ሰው ቢጻፍ መልካም ነበር ይህም አይገባውም ብየ ነው	1
አይ መስከረም አበራ እያደሩ ማነስ	1
ክሽፈት እንደዳንኤል ብርሀኔ	1
ሬሳ ናቸው በተለይ ኤርሚያስ ከሰው በታች ከእንሰሳ በላይ ነው	1
በአንተ ስብከት እንኳን የአንድ አገር ህዝቦች ይቅርና አገረባች አገሮች መሆን ራሱ በሽታ ነውመጽሀፍ እንጅ ማንባብ አትችልም ሀሳት ተበልክ በቃ	1
አንችን ብሎ በአማራ ዘውግ ውሰጥ ተዘፍቀሽ አይደለም እንደ ግን መብትሸ ነው ግን ደግሞ አታጨበርብሪ	1
እፏፏፏ እር እስከ መቸ ክልሉ እኮ መግስት አልባ ነው ህዝብ እጂ አመራር የለውም ቢኖር ኑሮ የታገቱትን እህቶቻችንን ያስለቅቅ ነበር አሁን ምን ይሉታል ንጹሀንን መግደል	1
እውነት ብለሀል ይህ ታሪክ ተመዝግቦ ይቀመጣል ወደፊት ለትውልድ ይዘከራል በዚህ አስከፊ የወረርሽኝ ወቅት በመንግት እየተደረገ ያለው ድርጊት አሳፋሪ ነው ጸሎተ ምህላውን ከንቱ የሚያደርግ ስራ በሀይማኖት አባቶችም በኩል ለምንድነው ኦሮቶዶክሱም ሙስሊሙምካቶሊኩምፕሮቴስታንቱም ሁሉም የሀይማኖት አባቶች የማያወግዙት ታዲያ እርቅ ብለው ምህላ ጸሎት መያዛቸው ምኑ ላይ ነው የእስልምና ሰበካ ጉባኤ ሀጂ ሙ	1
ወግ ወጉን ይዘህኽዋል ወያኔ አሸንፏል ያለውን ስብስብ ነው ፓርላማ ያልከው ቀልደኛ	1
አውቀህ ሞተሀል	1
መስኪ ኮሮና እያለ ሌላ አጀንዳ አነሳሽ ብሎ አንቺንም ኮሮና አሁን ላለው አመራር አሪፍ መደበቂያ አጀንዳ ሆኗል	1
ታኬ ጀግና ነውእስክንድር ወደ ቃሊቲ ገብቶ ሲመረቅ ወጥቶ ቢያየው የተሻለ ነው	1
ምንድነው እየሆነ ያለው አንድ የመንግስት ከፍተኛ ባለስልጣን ኢሜል እየላከ ሲያስፈራራ በፌስቡክ ላይ መስደብ ብቻ ነው የምንችለው ከዛ የዘለለ መፍትሄ የሚሰጠን አካል የለም ስዩሜ ለሚመለከተው የህግ አካል ማቅረብ ይኖርብሀል እሱ ግን እንደጋዳፊ እንዳንገለው ፈርቶ መቀሌ መሽጎ አያፍርም ሰው እልካለው ሲል	1
የሚገርመኝ ሌላው ቢያንስ ዱላና ሳንጃ አያነሳም እንዴ ተደራጅቶ ኦረ ጎበዝ አንተም ይዘህ መክት ዋጋ ክፈል	1
እስካሁንም በሚቆረጥልህ ዳረንጎት እኮ ትግሉን ከውስጥ ሆነህ የምታምሰው ይኼ ቀድመን መጠርጠር ያቅተን ኑሯል ብለህ ነው ምንም እንዳልተቀበለ አእንደ አዲስ አመልካች ከሀ የምትጀምር ለመምሰል የምትጋጋጠው ወናፍ የሰው ወናፍ	1
የስድብ ክፉ አቅሙን አያውቅ ይሚባለው ለአንተ አይነቶቹ ነው ሰዎች ስለሆኑ ሊሳሳቱ ቢችሉም ለብዙ አመታት ባደረጉት ትግል ማንነታቸውን እናውቀዋለን የማትመጥናቸው ሰዎች ላይ አሳማኝ ያልሆነ ትችት በመጻፍ አትድከም	1
ኮረናን ስበብ በማድረግ ከጎናቸው እሚቆም አይኖርም በሚል ስበብ ነው ይህን ጦር ያዘመቱት ሲደምር ወይዘሮ ተመስገን እሚያስተላልፈው መልክት እና እሚሰራው ስራ ሆድ ጀርባ ነው ፋኖን እስከሂዎት ፍጻሚያችን ከጎኑ ልንቆም ይገባል ኮረናንም እንደዚሁ በመደራጀት እንዋጋ አመሰግናለሁ አቶ ገብርየ	1
እንደዚህ ለመውረድና ተላላኪ ለመሆን መማርህ ለምን አስፈለገቢያንስ እነሱ አቋም አላቸው	1
በደንብ ነው ያየሽው ጀግኒት ያውም ከመረጃ ጋር ነው ትንታኔ ሚሰጥ	1
የአባ ኮስትርበላይ ዘለቀስም ሲነሳ ያመኛል ምክንያቱም የአሁን ዘመን ትውልድብቻ ልተወውታጋይ ይሞታል ትግል አይሞትምነውና	1
የአንቺን አእምሮ ያህል ትንሹን ማሰብ እስከምንጀምር ደጋግመሽ ጻፊ	1
አንችስ ለሀገርሽ ሚን ያህል ስህተት ሳታስተናግጂ በሀላፍነት በተወከልሽበት ቦታ ተወጣሽ	1
አንቺም እሳቸው ጋ መርጠሽ ልትሞሸሪ ነው የፈለግሺው ዙሮ ግን ስልጣንም ከፈለግሽ ተጠጊያቸው አባቢያቸውበዳይ	1
አየ ወንድሜ ከመጀመሪያው ነው ጭንቅላት የልተፈጠረብህ ዝሮ አንተ ምንም አላረክም አፈጣጠርህ ነው ለመለስ የሚሳደብ ሰው ሰው ሰው ሳይሆን አህያ ነው አረ አህያም አይደለም አህያማ ቁም ነገር አላት ማን ልበልህ ታድ እኔጃ ብቻ ሸይጣን መሆን አለብህ ምክንያቱም ሸይጣን ነው ከጥሩ ነገር የማይስማማ አንተ ደግሞ የሱ ልጅ ሳትሆን አትቀርም አይሁዳ አህያ ጅብ አንተ እንጂ ለመለስ አህያ ብለህ መቼ ያምርብሀ	1
አፍ ሲከፈት ቅንጭላት ይታያል ይባላል እውንት መሆኑን በአንተ አየሁት ይህን ያህል ከእውቀት ነጻ አትመስለኝም ነበር ቀፎ እስኪ ተመቻችተህ ከምትኖርበት መጥተህ ህዝቡን እየው የጎደለው ፖለቲካ ሳይሆን የሚበላው እህልና ውሀ ነው	1
ዲ ን ዳንኤልን የመፎገርም ሆነ የመተቸት ሞራልም ብቃቱም የላቸውም ደንቆሮዎች	1
ውታፍ ነገር ነህ ደግሞ አታፍርም አራት ኪሎ እገባለሁ ስትል ህልመኛ ነገር ነህ	1
ትልቅ ፖለቲከኛ የመሆን አቅም እያለህ ጥቃቅን ነገሮች ላይ ትኩረት በማድረግ ራስህን ማዋረድህ ያሳዝናል	1
ከባድ ሀዘን ነው ወገኖቼ የገጠማችሁ እኔ ግን ሞተች ሲባል በጣም ያሳዘነችኝ የ አመት ልጃ ነበረች ምክንያቱ እናት ስትሞት ትንንሽ ልጆች ካሏት የሳን ባታ ተክታ የምታሳድጋቸው እሷ ስለሆነች ይህን ደሞ የደረሰበት ያውቃል የኔ ትንሽ ልጅ እግዚአብሄር ይረዳሽ ይህ ሀዘን ከባድ ቢሆንም አደራ ልጆቹን እያልሽ ከትምረትሽ ወዷላ እንዳትቀሪ ይህን የምልሽ ሰለማውቀው ነው በርቺ የአባትሽም ጉልበ	1
ናትናኤል ከበቡሽን እና ዙሪያሽን ሰላም በልልኝ	1
አዝለኸው ዙር ግንባር ላይ ተነቀሰው ግድ የለኝም አንተም እሱም ገደል ግቡ	1
የማን ሟርተኛ ነው ላንተው ያድርግ አንተ ሽንታም እሺ መቼም አይሞትም የውሻ ሻጭ ልጅ	1
እኛን እንዳታዳምጡ መጽሀፋችሁን አንብቡ ብለሽ ራስሽ ስትኮመኩሚ አመሸሽልኝ	1
አስቱ ትክክል ነሽ ሀብትሽ እጅግ የማደነቀው ጋዜጠኛ ነው አስቴር በዳኔ ንግስተ ነገስት ዘ ኢትዮጵያ	1
ያጢንህ አሁን ልደቱ ስድብ ያውቃል	1
በራባ ዶሪ ዘመኑ ሰውን አድኖ ገድሎ በመረጃነት ይዞ ያልተገኘ ሉባ ሲሆን መሪ ወይም አባ ገዳ ሆኖ አይመረጥም ይሄን ነው ሚማሩት	1
ያንተን ቁላ በዚህ በጀገራ በቆረጠልክ ጥሩ ነበር	1
ራስህን እንደ ህዝብ ነው እንዴ ምትቆጥረው	1
መሰጠት መታደል የሚባል ነገር አለ አንተ ገብርየን ልሁን ብለህ ስለመረጥክ መቸም ቢሆን ገብርየን አትሆንም ገብርየ በወገኖቹ የታመነ ጀግና የጦር መሪ ነው	1
ከለውጥ በኋላ በሳማ እንደተገረፈ ህጻን አቅለብልቦት ነበር እስኪ ቂሊንጦ ይግባ እና ሰከን ይበል ሆ	1
አብዪ ቡዳ ሩኩስ አሀያ	1
ትንታኔ እሰጣለሁ ብለሽ እያናነበብኩ ሀተታው ጠፍቶብሽ ግለሰብ ላይ ተጠልጥለሽ ቀረሽልደቱ ሙቶ ይበልጣችኋል	1
በስላም ተመለስ አብያችን ከቀን ጅቦች ፈጣሪ ይጠብቅህ	1
አታስከፋን ዘመዴ መራራ አርቶዶክስ ነው ያለከውን ቶል ብለህ ኤዲት አርገህ መራራ አብድ ነው በለህ አርመው ምን ይስመስላሉ አንደው ዱርዬዋች ሲጀመር አህያ ነህ አህያ ደግሞ ስራዋ ሸክም ነው ስለዚህ ድርሻህን እወቅ ባንተ ቤት ለመከፋፈል ነበር ሽንታም ዝም ማለታችን ነገን ለማየት እንጂ የነፍጠኛን ጥግ መች አጣን	1
እውቀት አንተ የምታውቀው ብቻ ነው የሚመስልህ ጀል ዋቆ ጉቱ አንተ እንዳልከው ሽፍታ እንደሆነ አድርጎ የኦሮሞ ህዝብ የሚያየው ቢሆን ኑሮ እንዲህ የሚያከብረው ይመስልሀል ለምን የራሳችሁን ፍላጎት በግድ ሰው ላይ ለመጫን ትለፋላችሁ በእንዲህ የሚፈጠር የጋራ ታሪክ አይኖርም	1
ያገለግሉናል ብላቹ በተንኮል አሰለጠኗች ጭራሽ በልጠዋቹ ቁጭ	1
አተላ ነገር ነሽ አተላ ጥንብ ግም ጥንብ የተላሽ	1
እሽ ቀጥል አንተ የብልግና የወጥ ቤት ሰራተኛ ነው መሆን ያለብህ ጡረተኛ	1
አንተሰው ሰሞኑን ለኮሮና መድሀኒትነው ብለህ ኢሄን የሀበሻ አረቄ ግፈህ ግፈህ የምትለጥፈውን አታውቅም ልበል አሊያም ፊደል የቆጠርከው ጠላቤት ነው እንጂ ስርአት አልበኛ የሆነው የፋኖ አደረጃጀት የተለያዮ የመንግስት መዋቅሮችን በማን አለብኝነት በጣጥሶ በጎበዝ አለቃ ሲመራ ትንፍሽ ያላልክ ሰውዬ ዛሬ እርምጃ ሲወሰድበት ጎጃምአዘነህን ተከናንበህ አዬዬ ብትል ማን ይሰማሀል መንግስት ለአንዱ እናት ለሌላው	1
ልደቱ አልገባውም እንጅ የኢትዮጵያ ህዝብ ከቀበረው እኮ ቆየ	1
ወሮ በቄ ተደፍራለች እንጅ አልተደፈረችም	1
አስተዋይ ሴት አይደለሽም ስሜትሽ ተቆጣጠሪ አርቀሽ አስቢ ትግስት ውጤቱ ያማረ ነው ያንቺ ምክር ለአብይ ከጥቅሙ ጉዳቱ ይበልጣል እባክሽን ዝም በይ አንድ ሰው አንድ ሰው እንዴት ያቅታል ስትይ የው ውጤቱ	1
እመነኝ ጃዋር ኩሎ ሰተት ብሎ ይገባል	1
ባካችሁ ዝምበሉ የሌለ ትንቢት እየተናገራችሁ የንግስት ስንዱ እራሷን ንግስትነኝ ለምትለዋ ለሀሰተኛዋ ሲሳይ እየዳረጋችሁን ነው እሷም የሚያስቆማት ሰውጠፍቶ በአብይጾም እኩሌታው ተከታዮቿን አስፈስካለች ተዋህዶን አየተፈታተነችነው ማንያውቃል ከዚህ በኋላደግሞ እኔቴድሮስ ነኝ ብሎ የሚመጣ ሀሰተኛ ንጉስ ቢመጣስ ስንዱንም ማስቆም አልቻልንም እንኳን ሌላተጨምሮ ራሳችንን ለፈተና አናጋልጥ ቴዎድሮስ ከተባለና ትንቢት መነገር ከተጀመረ ከመቶ አመት በላይ ነው ግን እስካሁን ፍንጭም የለም	1
ብዙ ከርሳም በበዛበት ዘመን በመርህ የሚሞግት ሰው ስለሆነ እኔም ለሀብታሙ ታላቅ አክብሮት አለኝ ይህ ሰው በህወሀት የደረሰበትን የግፎች ሁሉ ግፍ ያደግሁበት ባህል ስለማይፈቅድ መናገር አልፈልግም ነገር ግን ይቅር ብያቸዋለሁ ያለ ሰው ነው	1
ስዩሜ እስኪ አስተያየቶችህን እያቸው	1
አስቱየ ተወዛወዝሽ እኮ እንደ ዛፍ አንዴ ትደግፊው አለሽ አንዴ ደግሞ ባደባባይ ትተችው አለሽ ሲጀመር ጅሀር ማለት የዶክተሩ የጀርባ አጥንት ነው መቸም ቢሆን ለፍርድ አያቀርበውም	1
ድራማቸው አሳቀክ አይደል ድራማ በናንተ ጊዜ ቀረ እውነት እስኪመስለን ነው እኮ የምትሰሩት	1
እብድ ቅናት እኮ ያሳብዳል ምንም እንዳትባል ከፈለክ ለምን ትዋሻለህ አንተ የሰይጣን ፈረስ ምንም አታመጣም አቢቹ በኢትዮጵያ እና በአለም ላይ ከፍ ከፍ ብሎ ስታይ እንደ ይሁዳ ተጸጸተህ ትታነቃለህ የክፉዎች መጨረሻ ይኸው ነው	1
አለማወቅህን አሳበቀብህ በ የ አመት ልጅ ነበርክ ማለት ነው	1
ሰው ልትበሉ ስታስቡ ስታወድሱ አሁን እንደው ማን ይሙት እናንተ በቀለን ጃዋርን ህዝቅኤልን ታሞግሳላችሁ	1
የሚባክን ጉልበት የለኝም ብሎ ደምድሟል አቅምን አውቆ መኖር ጥሩ ነው እንዲህ ስታምን እኮ ደስ ስትል	1
እና እኮ አሪፍ ነው ማን ተጎዳ ታድያ	1
ያየሰው ምድቡ እኛ ጋር ሆነ ወይስ እናንተ ና እኛ በሚል መርፌ የተወጋ አእምሮህ ነው ያለህ	1
አንች ቱሪናፋ ነገር ነሽ በምንም መመዘኛ ቢሆን ልደቱን የመተቸት ሞራሉም ብቃቱም የለሽም ላይ ድድ ከማስጣት ውጭ	1
ምን ችግር አለ ታዲያ አርፎ ካልተቀመጠ አሁን በብልጽግና ይገረፋል ሰብአዊነት እስኪናፍቀው ድረስ ለነገሩ ሳይቦሸቱ አይቀርም እሱና እስክንድር እንደ ሀብታሙ አያሌው	1
ታደሰ ጥበቡ አንተ የሰይጣን ዘር አሁን ይህን ድርጊት ቅድሚያ ያሳየ ማን ነው የቅማንትን ህዝብ መተማ አርደህ ዘግናኝ በሆነ ድርጊት ከአንድ ጉድጒድ አምሳ ስምትሰው አልተቀበረም የክፋት መደር ክፋት ታሳያላችሁ ሰላማዊ ህዝብ ታስጨርሳላችሁ ፈጣሪ ይፋረዳችሁ ለሁሉም ጊዜ አለው ቅርብ ነው አይርቅም	1
መማር እንደዚህ ከሆነ አለመማር ይሻላል እኔ ስመስለኝ ግን የሚያስለፈልፍ መርፌ ተወግቶ ይመስለኛል አሁን አተ የወላይታን ህዝብ ወክለህ ነው ተናገርከው የኢትዮጵያ አምላክ ይድፋህ	1
ታዴ ውዱ ሰው አንተ ሁሌም ጀግና ነህ ያልኩት ነገር ደረሰ ከዚች ከተረገመች ሴት ጀርባ ብዙ ባለስልጣናት ይኖራሉ ብየ ነበር የታዴን አካውንት ይለቀቅ	1
አንቴ ውሸ የውሸ ልጅ እነትህ አንቴን ወልደ ሰይሆን በአራእ ነው የወለደችህ	1
አዋይ አንሄካ ፋራ	1
ይሄ ጂብ ሆድ ነው አንድ ቀን ዋጋውን ያገኘዋል ብቻ ከልብ መጸለይነው	1
በለውጥ እና በ መደመር አባዜ የተጠመድህ አማራ ዛሬስ የለማ መገርሳን መግለጫ ሰምተህ ምን አልህ ለማንኛውም አር እና ጋላ እያደረ ይገማ ይላል የሰው ዘር	1
ብለህ ብለህ ደሞ ከጃዋር ገጠምክ	1
የተሸዋረረ ያተ አይን ነው	1
በእውነት ሄኖክ ትክክል አይደለህምየሙታንን ፎቶ መለጠፉ ትክክል አይደለምቢያንስ ወገኑን ዘመድ አዝማዱን እና ቤተሰቦቹ ምን ያህ በስሜት የሚጎዱ ዱሆኑን አስበውበጣም ትክክል አይደለህምካሉት መሪዎች ውስጥ በድክመት የሚታዪትን እና እነዚህን መሪዋች ስማቸውንም ጠቅሰህ ብትገልጽ ያምራል	1
ከጃዋር ፌስ ቡክ ፖስት ውስጥ አንድም ስህተት እንደማታገኝ እርግጠኛ ሆኜ ነግርሀለሁይልቁንስ ያንተ ፌስ ቡክ በንጹሀን ደም የጨቀየ ነውማርያምን	1
ምርጥ ሀሳብ ምርጥ ፕሮግራም ታክሎበት ምርጥና ጠቃሚ ውጤት ለህዝቡ ያስገኝለታል እናመሰግናለን አንተም ምርጥ ልጅ ነህ በርታ	1
አደራህን እነዛን የግል ቅሌቶቹን ሳታሳየን እንዳይገልህ	1
አይ ዳኒ ሞተ ብለሽ ንፍሮ አነፍረሽ ሽር ጉድ ስትይ ከች አለ ትንሽ ደንግጠሻል አይደል አይዞሽ ኢሱ ሳይጨርስ አይሸኝም	1
ይችን እብድ በቁጥጥር ስር ያዋለ የአባቶቻችን አምላክ ይክበር ይመስገን የዚች ከይሲ ተላላኪ ተከታይ የሆኑትንም በማጋለጥ ተባበሩ	1
እኔ ግን እጅግ የሚያሳዝነኝ የመረጌታ ገብረመስቀል ተሰሜ ነገር ነው	1
እራሱን ፈሳም እያለ የሚሳደብ ፈሳም ነው ስዩም ማለት	1
እዛዲያ የሽምቅ ውጊያው መሪ አንች ነሽ ነይና የኦፕሬሽኑን ንድፈ ሀሳብ አብረን እንስራው	1
ክክክክኮኮ አረ አታስቀኝእኮ ላንተ ማስፈራርያ	1
ወይ አስቴር በዳኔ የኛ ሰጋቱራ ሰው በባርነት ሲገዛ በፖለቲካዊ መብቱ ነው አንቺ ግን የተገዛሽው በስጋሽም በነፍስሽም በአእምሮሽ ምጭምር ነው የሆንሽ አፈቀለቀሎ	1
ስለ ኢትዮጵያ ብላችሁ በግድም ቢሆን ይህ ሰልፍ እንዳይቀር አድርጉ እስክንድር ዛሬ ይሞታል ይህ ከቀረበት	1
አንተ አህያ በሰምህ እንድትጠራ ያረገህ ጁንታ የምትለው የነጻነት ምልክቱ ነው ነገ ሁላቹም የእጃቹን ታገኛላቹ እሳቱ መጨረሻው እናንተን መብላት ነው	1
ዳኔል ሀሀሀ የማትለውጠው ሆኖብህ እንጅ አንተማ አምባሻውን ባንዲራ ነው የምትወደው ኢትዬጵያዊነት ሲገፋ መቀላቀሉ ተወውና ያንን አንባሻ ባንዲራህን አክሱም ሀውልት ላይ ስቀለው ወደድክም ጠላህም መብት ጅኒጃንካ ከማለት እውነታውን ህዝባችን በአይንህ አሳይቶሀል አትቀላምድ አጎቶችህ ጨው የቋጠሩበትን ባንዲራ እንዲህ ነው በክብር የምናውለበልበው	1
በውስጥ ጉዳያችን ምን ጥልቅ አደረገህና የራሷ ሲያርባት የሰው ታማስላለች እንዲባል አበደን የጎበጠውን አቅንተን የተጀመረውን ጥሩ ለማድረግ ስራ ላይ ነን	1
አንተን ለዚህ ወታደር ነበር መስጠት እንደ ኳስ ጥባ ጥቤ ቢጫወትብህ አሪፍ ነበርከራየን ወንዝ ማዶ ተዘፍዝፈህ ሚስኪኑን መህበረሰብ ለአመጽ አተነሳሳመቼም ቢሆን እኔ የፈለገ የትግራይ ልጅ ብሆንም አማራ የኔ መንታ ነው ወንድሜ የታገቱት አህቶቼ ናቸው በበኩሌ አቃወማለሁ ከሙሉ የአድዋ ወጣቶች ውግዝ ከመ አርዮሰ እንወዳችሁለን የአሳምነው ልጆች	1
በባልደራስ ተግባራዊ የትግል ስልቶች ላይ መጠነኛ ልዩነትና አመለካከት እንዳለሽ ገልጸሻል እና የባልደራስ የትግል ስልቶች ላይ ያየሽው ህጸጾች ምንድናቸው አማራጭ ያልሻቸው መንገዶችስ	1
ጋን በጠጠር ይደገፋል እንዲሉ የአንተም አንድ ጠጠር ታስፈልገናለች ከዚህ በኋላ አትጥፋብን	1
በዚህ ጉዳይ እስክንድር ከጃዋር ተለይቶ አይታይም	1
ውይ አንተ ጫታም ግን ይህ የለውጥ መሪ ነኝ የሚለው አጭበርባሪ ቡድን ስንት ነው የከፈለህ	1
ቆሻሻ ጭራቅ ነው ከሰይጣን የከፋ ይሄ ቅማላም ካድሬ ቱ ቱ	1
እኛ ታሪካችንን እንደግማለን እንገነባለን ምክንያቱም ያባቶቻችን ልጆች ነን እና እደሱ ወፍ ዘራሽ በጭራሽ አይደለንም	1
ከኢትዮጵያዊያን የማይጠበቅ ጭካኔ እውነት ግን ኢትዮጵያዊ ናቸው ታድያ ለምን ጨካኝ ሆኑ በሴት በህጻናት ይጨከናል	1
አንተ ሰው ሲደራጅ ስትኮንን አልነበረምን	1
እስኬው ነው መቸም ያነሰብሽ	1
አስቴር ማለት አዝግ ነሽ ቢያንስ ልጆጅች አሉሽ አይደል እና እንዴት ይረሳል አንድ እናት ባንድ ቀን ሁለት ልጆች አጥታለች እሱ ከማን ጋ ሲሞዳመድ እንደነበረ ታውቅያለሽ አይደል	1
ከአሁን በኋላ ጋላ ማንነቱን ለመደበቅ የሚያደርገውን ጥረት በዝምታ አናየውም ውሸት ሲደጋገም እውነት ይመስላል እና ኢትዮጵያ ውስጥ እንደ ህዝብ ቆማጣው ጋላ ብቻ ነው ኢትዮጵያ ውስጥ ያሉት አምስቱም የቁምጥና ጣቢያዎች ያሉት ጋላ ክልል ነው ጋላ በተፈጥሮ የቁምጥና በሽታ የሚያጠቃው ብሄር ነው	1
ጎሽ ይሄ በሽተኛ እንኳን ታሰረ ይሄ ሰይጣን እንደእሱ አይነቶቹንም አወናባጆች እየፈለጉ ማሰር ነው	1
የሱን ነገር ተውት ስንቱ ሊነገር	1
ታደሰ ካሳጥንቅሹ ካልተጠየቀ ማንም መጠየቅ የለበትም አንድ ብቻውን የአንድ ክልል	1
አስጠልተከናል	1
አሁን ብትንጫጬም ባትንጫጬም አንድ ቀን አንድ ማለዳ ጥሪግ ብላችው ኮተተአችውን ጥላችው በየጓዳጓዱ በየሸንተረሩ በየጫካው ኮብልለሽ ትወጫለሽ	1
የአልበሽር መወገድ በአንድ በኩል ጥሩ እድል ይመስላል አልበሽር ከአለም የመንግስታት ስርአት የተገለለ መሆኑ ድርደር ለማድረግ የማይመች በተደራደረበት ነገር የማይረጋ እና አስተማማኝ ያልሆነ ሰው ነበር	1
አንተ ሰውዬ የምታወራውን ነገር ብትጠነቀቅ መልካም ይመስለኛል እኔ ኦሮሞ ነኝ ግን ፈሪሀ እግዚአብሄር አለኝ ኢትዮጵያዊነቴን ለአንዲት ሰኮንድ እንኳን ዘንግቼው አላውቅም ከኦሮመነቴም ጋር አልተጋጨብኝም አንተ እዛ ሆነህ በፎቶ አይተህ የምታዝንላቸው ሰዎች እኔ በአይኔ አይቻቸው ልነግርህ ከምችለው በላይ ልቤ ደምቷል የተቻለኝንም ሁሉ እያደረኩም እገኛለሁ ይልቅ አጠገብህ ልታጸዳቸው የሚገቡ ነገሮች ስላሉ ተፍ ተፍ ብትል መልካም ነው	1
መቼ ነው ወጥ አቋም የሚኖርሽ ግን አስቱ ገዢውንም ተቃዋሚውንም ተሳዳቢውንም የምትደግፊው አካሄድሽ	1
አንች የነፈጠኛ ልጅ ወሸወሸ	1
አሳማ አንተን ብሎ ነቃይ ለፍልፍ እንጂ	1
ከሁሉም የተረዳሁት ነገር የአንተ ጉዳይ ስመጥር ለሆነው ዩኒቨርሲቲ ግራ የሚያጋባ መሆኑን ነው አንተ ግን ያልሆንከውን ነኝ በማለት አሁንም በየዋህነት የሚከተሉህን የጥላቻ አብጊዳ ቆጣሪዎች ታደናግራለህ	1
አሁን ይህን ሰምቶ ከነጆሀር ጋ ልደቱን ማወዳደር ምን ይባላል ጠነኛ ነው እንበል የልደቱን ሀሳብ የማይደግፍ ውድቅ የሚያደርግ ሰውመቸም ፖለቲካ የማይገባው ራሱ የወደቀ ነው	1
ድልብ ደደብ መጀመሪያ ስው ስው ሽተት	1
ያንተ ተረት ተረት ደግሞ ማለቅያ የለውም	1
አንተ ደግሞ ምን አይነት ደደብ ነህ እኔኮ አስተዋይ ነበር የምትመስለኝሁሉንም ነገር አማራዊና ክርስትያናዊ ግንኙነት እና ይዘት ብቻ ያለው ለማስመሰል ትሞክራለህ ሚዛናዊ ለመሆን ትሞክራለህ ግን ወገንተኛ ነህ ከቻልክ ለህሊናህ እና ለእውነት ብቻ ቁሞ አንተ የምትወግንለት አካል ሲነካ ማጮህ ብቻ ሳይሆን ልክን ሳይሆን ሲገኝ ልክ አይደለም ማለት ልመድ እንጂ የኔ ወገን ሲሆን ልክም ባይሆን ልክ ነው አይነት ገጸ ባህሪ አትላበስአህመዲን ጀበልን ተሳድበህና ስም ለጥፈህ እንደ ዘመድኩን አይነቱን ልክ ነው ብትል ማንም አይሰማህም እሺ ከምንም ነገር ሰውነት ይቀድማል እንጂ ዝም ብለህ መጻፍ ስለቻልክ እና ቲፎዞ አለኝ ብሎ መጻፍ አዋቂ አያስብ…	1
በአሉ ባህላዊ የምስጋና በአል እንጂ ሀይማኖታዊ እንዳልሆነ ባለቤቶቹ ይናገራሉ አንተ ሀይማኖናዊ ነው የምትለው ከባለቤቶቹ በላይ ነው የምታውቀው ማለት ነው ከባለቤቱ በላይ የሚያውቅ ደግሞ ምንድን ነበር	1
መስኪ የአንች ልቅሶ ባሰን ከግንቦቴ በላይ ግንቦቴ ልሁን ያልሽውን ረሳሺው	1
ሰውዬ የጋራ ታሪኩን ምነው የኔ የኔ ማለት አማራቹ ስም ሲሰጠው የኢትዮጲያ ቅርጽ ለሚባለው ምን በጠዋቱ እንደ ቁራ ያስለፈልፍካል	1
አይ ጊዜ ደጉ ድሮ ያኔ ጨጓራችን አየተላጠ የፍትህ ስርአቱ ልክ አይደለም ስንል ሌላው ደግሞ ሲታሰር ፍርድ ቤት ይለቀቅ ወይም ዋስትና ሲፈቅድ ፍርድ ቤቱም የናንተው ነበር	1
አንተ ጀዝባ ቆርቆሮ ሳይጠይቁህ አታውራ	1
አፌ ቁርጥ ይበልልሽ የኔ ዝጀግና እናት ኢትዮጵያ ማለት አንቺ ነሽ	1
ሀፍረት የሌላት የሴት ሰገጤ አይሻባችሁ አኡዙ ቢላህ አንዳንድ አቅማቸውን የማያውቁ ደናቁራን እንስቶች አሉ የሴት ልጅ ወበቷ ሀያእዋ እንጂ ክፍት አፍነቷ አይደለም	1
ሴትልጅ የፌስቡክ ማድመቂያ እንጂ ተጠቃሚ ናት ሊባል አይገባም የፌስቡክ ተጠቃሚ ለመሆን እውቀት ያስፈልጋል	1
ሴት ልጅ ከብት ነች አህዮች ቱ	1
አሁን የገባኝ እንደ ሰው ልጅ ሳስበው ኢትዮጵያውያን ለኔ አስፈላጊ አይደሉም እነሱ የሚያስፈልጉት ለእንስሳ ድጋፍ ብቻ ነው አሁን ከአበሻ የምፈልገው ወንዶቹን ለድብድብ ሴቶቹን ለእምሳቸው ብቻ ነው	1
አገሪቱ ውስጥ ፍቅር በጠፋበት ዘመን የፍቅር ቀን ለማክበር የሚንጫጩ ሴቶችን ሳይ ከሴት ልጅ የማደንቀው ነገር አጣለሁ ከሴት ልጅ የማደንቅላት ከአካሏ ብልቷን ነው ከአእምሯ ማሰብ የማቆም ብቃቷን ነው	1
ሴትነት ወሲብ ነው	1
ሴት ልጅ የተፈጠረችው ወንድን ለማገልገል ነው	1
ሴት እናት ስትሆን በማህጸኗ ተሸክማ ወንድን ልጅ ታገለግላለች ሴት እህት ስትሆን ለወንድሟ ምሳ ታቀርባለች ሴት ሚስት ስትሆን ወንድ ስፐርም ትቀበላለች	1
ሴት ልጅ የወንድ ልጅ የህልውና መሳሪያ ናት ልክ እንደ ሳምሰንግ ሞባይላና እንደ አይፎን ቨርዥን እየቀያየረች ትለባብሳለች ትኳኳላለች	1
ሴት ልጅ ወደ አልጋ ሲሄዱ የስሜት ማእድ ናት	1
መጀመሪያም የተፈጠረችው ከአዳም ግራ ጎን አንድ አንድ አጥት ተበድራ ነው ስለዚህ ሴት ልጅ የወንድ ልጅ እዳ ናት ክፍያውን አስክትጨርስ ድረስ ሴት ልጅ በዚህ ፕላኔት የራሷ ህይወት የላትም	1
እግዜብሄር ሄዋንን ለመፍጠር ከአዳም ግራ ጎን አንድ አጥነት ተበድሯል ከዚህ አንጻር ሴት ልጅ በምድር ስትኖር አግዜአብሄር ለአዳም ያልመለሰው የወንድ ልጅ እዳ ናት	1
ሴት የወንድ እዳ አለባት ስለዚህ ሴት ልጅ ወንድን ከማገልገል ውጪ አማራጭ የላትም	1
ሴት የወንድ ልጅ እዳ ናት እዳው ካልተከፈለ አንላቀቅም ስለዚህ ሴትነት አግዜር ለአዳም ያልከፈለው ሴቶች በጉልበት የሚመልሱት ውዝፍ ወለድ ነው እኩልነት አይሰራም	1
የጋላ ሴት ከማገባ ሲጥ ብል እመርጣለሁ	1
ከደደቦች ብዙ ነገር ተምሬያለሁ ለምሳሌ ከሴቶች የተማርኩት አለማሰብ ከማሰብ በተሻለ ሰላም እንደሚሰጥ ነው	1
እቺ የጭን ገረድ እኮ ስትጦዝ ሚስጥር እያወጣች ተቸገርን	1
ብዙ ሴተኛ ወንዳገረድ አይታቹ ልታውቁ ትችላላቹ ታየ ደንዷ የሚያክለው ግን የለም	1
ሴት ልጅ ማለት ውሻ የውሻ ልጅ ናት ክብሯ እራሱ የሰይጣን ቀንድ ነው	1
ሴት ማለት የሴክስ ማሽንእና የሰው ጫጩት መፈልፈያ ናት	1
ሴትን ያመነና ጉም የዘገነ አንድ ናቸው ይላሉ አባቶች ባአጠቃላይ ሴት ማለት ፔሬዳም ሴ ማለት ሴሰኛ ት ማለት ትምህርት ቤት ማለት ናት ቡሽቲን የምታሰለጥነው እራሱ እርሷ ናት ናት	1
ሀብታም ስር የማይጠፉ አበሻ ሴቶችና ቆሻሻ ላይ የሚርመሰመሱ ዝንቦች አንድ ናቸው	1
አበሻ ሴትና ዝንብ ሰውን የሚፈልጉት በሰውነቱ ሳይሆን በሚጥለው ቆሻሻ ልክ ነው	1
ሴት ልጅ ብታጣፋም ባታጠፋም በቀን ግዜ መገረፋ አለባት ሴትና አህያ ድላ ይወዳሉ ይባላል ካነሰም እንደ ሁነታው እየታየ ይጨመርላታል	1
በመቶ የሚሆነውን የአገሪቱን ችግር ለመፍታት የሴቶችን ተሳትፎ መገደብ ብቻውን በቂ ነው ቀሪው የአገሪቱ ችግር የሚፈታው ወንዶች እየተሳሳቱም ቢሆን በሚሰሩት ስራ ነው	1
ወንድ ማለት ውሻ ድቃላ መሽተኛ ለማኝ ሸቀጥ ሸርሙጣ ነው	1
ከአበሻ የምፈልገው ወንዶቹን ለድብድብ ሴቶቹን ለእምሳቸው ብቻ ነው	1
አበሻ ሴትን ዴት ማድረግና በአሻንጉሊት መጫወት አንድ ናቸው የአበሻ ሴት ላይ የተኳኳሉ አይኖችና ውብ ከንፈር ታያለህ በቁመናዋ ትማረካለህ አስተሳሰቧን ስትገልጠው ከእሷ ይልቅ አሻንጉሊት ታከብራለህ	1
ሴቶችዬ ምነው ከ አመታቹህ ትዛላላቹህ ትጨፍራላቹህ ታተራምሳላቹህ በወንዶች ህይወቶ ላይ ትጫወታላቹሆ ልክ ላይ ሀይማኖተኛ ትመስላላቹህ አግቡኝ በሞቴ ልመና	1
አንቺ ጭቅቅታም ዝሆን ፊት ቅማላም ምናባሽ ሆንኩ ብለሽ ነው ፎቶየን የፖሰትሽው አንቺ ዲቃላ ዘረ ድክል ሸጋታ እምስ መጀመርያ የቂጥሽ ጸጉር ላይ ድሪል የሰራውን አርሽን አራግፊ ጥምብ ብስብስ ኪኪ ቡታ ገረድ ቁልቋላም አጋሜ ቱ	1
የአማራ ሴት ለኔ ምርጥ ውሻ ናት ዘር መንዝራቹ ይጥፋ ንፍጣሞች	1
የትግሬ ሴቶች ሰራቸው ሴትኛ አዳሪ ነው ቱቱቱቱቱ ሀገር አሳዳቢውች ቆሻሹች	1
አንቺ ዝንጀሮ ፊት ጥንብ ጋላ እኛን ፈጣሪ እንጂ ሰው አይመራንም ሂጅና የጀዋርን ቂጥ ላሽለት	1
ኦሮሞ ወንድ ጋላ ሴት ማግባት የማይደፍሩት ለካ ይሄን ከማዳጋስካር የመጣን ፊት በመሸሽ ነው	1
ለሴት ንፍጢት	1
ወንድ ውሻ ነው ስላቹ በምክንያት ነው እቺንም ቢያገኛት አይምሩም አባቶቻች አይወክልም እናተን ነው ወጣቶች ድፍት ያድርጋቹ ገንበጭ ሁላ ቱ	1
ገንዘብ ይኑርህ እንጂ ሴት ልጅ ባርያህ ነች እንደፈለክ ማድረግ ትችላለህ	1
አብይ አህመድ ስድ ባለጌ የሴት ልጅ ነው አሳዳጊው የተረገመ ያልተቀጣ ስድ የሴት ልጅ ነው	1
ወንድና ውሻ አንድ ናቸው ስላቹ በያገኙበት ነው ሚሸኑት ሴቶችዬ ተጠንቀቁ የነሱ ሽንትቤት እንዳትሆኑ ባይ ከዛሬ በህዋዊ እዚ ቤት አታገኙኝም	1
ወንድን ማመን ቀብድ ተቀብሎ ነው	1
የሴት ልጅ ጥያቄ የእኩልነት ጥያቄ አይደለም ሴቶች የእኩልነት ጥያቄ የሚጠይቁት የተለዬ የአስተሳሰብ አማራጭ ለመፍጠር አይደለም ከብዙ ወንዶች ጋር በተለዬ መልኩ የወሲብ እድል ለመፍጠር ነው	1
የሴቶች የእኩልነት ጥያቄ የመፍትሄ አማራጭ ሳይሆን በብዙ ወንዶች ዘንድ በወሲብ ስሜት የመታየት አድልን የማስፋት ጉዳይ ነው	1
ሴት ልጅ የእኩልነት ጥያቄ ካነሳች ከወንድ ያነሰ ሚና ስላላት ሳይሆን ከብዙ ወንዶች ጋር ለመውጣት ያላትን ፍላጎት እያንጸባረቀች ው	1
ምን እያልኳት ታንቀላፋለች ነው ነገሩ	1
ሀብታም ስር የማይጠፉ አበሻ ሴቶችና ቆሻሻ ላይ የሚርመሰመሱ ዝንቦች አንድ ናቸው አበሻ ሴትና ዝንብ ሰውን የሚፈልጉት በሰውነቱ ሳይሆን በሚጥለው ቆሻሻ ልክ ነው	1
ሴትነት ሴት ልጅ ትልቅ ህጻን ናት በእርግጥ ሁለቱም በዳይፐር ይመሳሰላሉ ህጻን ልጅም ሴት ልጅም ዳይፐር ይጠቀማሉ የሚለያዩት የዳይፐር ብራንዱ ላይ ነው	1
ሴት ልጅ የሚያስደስታት ህጻን ልጅ የሚያስደስተው ሂደት ነው ሴት ልጅ ባሏ የሚያስደስተው አያስደስታትም በዚህ የተነሳ የባሏን አዋዋል በሚመለከት በየጊዜው ታማርራለች ችግሩ ባል የሚውለው የተሳሳተ ቦታ ስለሆነ አይደለም ችግሩ ሙሉ ሰው የሚዝናናበት ቦታ ግማሽ ሰው ለሆነችው ሴት ልጅ ተመጣጣኝ ሆኖ ባለመገኘቱ ነው	1
ሴት ልጅ ሙሉ ሰው የሚዝናናበት ቦታ ለመዝናናት ከአቅሟ በላይ ነው ሴት ልጅን የሚያዝናናት ህጻን ልጅ የሚያዝናናው ሂደት ውስጥ ነው ለምሳሌ የጎረቤት ልጅ ልደት የሚያከብርበት ቦታ ውስዳት በጣም ደስ ብሏት ጣፋጭ ጊዜ ታሳልፋለች ቀጥሎ ላይብረሪ ውሳዳት ስታዛጋ ትውላለች	1
ሴት ልጅ ለፈተና ካልሆነ ማንበብ አትወድም ሲኒማ ትልሀለች ለምን እንደሆነ ታውቃለህ ሴት ልጅ እንደ ህጻን ልጅ የቶም ኤንድ ጄሪ አይነት የምስል ግርግር ትወዳለች ስለቢግ ባንግ ብታወራት እብድ ነው ትልሀለች ጓደኛዋን ወይም ሌላ ሴት ልጅ ብታማላት ግን ቁም ነገረኛ ትልሀለች	1
ህጻን ልጅ እና ሴት ልጅ የሚበላለጡት በቁመት ብቻ ነው በእርግጥም በአስተሳሰብ እኩል ናቸው	1
ሴት ልጅ ማለት ትልቅ ህጻን ናት ቅዳሜ ሲመጣ ሱፐር ማርኬት ስትገባ በጣም ትደሰታለች ለምን እንደሆነ ታውቃለህ ህጻናትም ላሜ ቦራ ሸርታቴ የሚጫወቱበት ዥዋዥዌ ያለበት ልውሰዳችሁ ስትላቸው የሚሰማቸው ስሜት ከሴት ልጅ ስሜት ጋር ተመሳሳይ ነው	1
ሴትና ውሻ አንድ ናቸው ሁለቱም ባሽተቱበት ይሄዳሉ ቱ ቱ ይድፍቹ	1
አንቺ ክርፋታም መጤ አንቺ ነሽ ደግሞ የሰው ሀይማኖት የምታነቋሽሺው ግማታም ወላሞ እስኪ መጀመሪያ ያን የገማውን የሻገተውን ፈንገሳም እምስሽን ታጠቢ	1
የምወዳት የ አመት ፍቅረኛየ ወደ መቀሌ ሂዳ ህወሀትን እንደመረጠችና ለህወሀት የምርጫ ቅስቀሳ እንዳደረገች ሰማሁ ምን ላድርጋትቂጧን ብዬ ላባራት ወይስ በሰላም ልለያትይህን በማድረጓ ልቤ ተሰብሯል	1
ወዮ ይቺ ደግሞ የባሰባት ነው	1
ይቺን ቅማል ቅርጽ ተመልከቱ ለነገሩ አንተ ምን ታደርግ አንዳንድ የእኛ ውሻ ሴቶች እምሳቸውን እየገለቡ ለጋላ ይበዳሉ ይሀው ፊት አግኝተህ እኔን ለመሳደብ በቃህ ይቺ መጋዝ እንኳን እኔን ለመናገር መብቃቷ ገርሞኛል አሁን ከእንቅልፌ ስነቃ ይቺን ኮሜንት ኮምቶ ወቷል	1
አንተ ምን አለብህ አይገባብህ አይወጣብህ ብላ ምትመልስ አትጠፋም	1
አንዳንዱ አቃቂር ሲያጣ እሺ ቤቲ ወንድ አደለ ለምን አህመዲን ጀበል አልጨበጠውም ይልሀል	1
ቤቲ ቱልቱላ ቁንጅና በቅጥነት እና በቁመት ተለክቶ አያውቅም የቁንጅና መሳፍርቱ ጥሩ ስነምግባር ነው	1
እባካችሁ ጸጥ በሉ ወንድ አካል	1
የምትግደረደር ሴት በጣም ነው ደስ የምትለኝ	1
ጭራቅ ከላይ እስከታች በአርቴፊሻል ብትሽሞኘሙኝም እንደወረድሽ ነሽ	1
አንተም አሁን ወንድ ተብለህ	1
ሴት ሆነው እንዴት በሴት እህቶችዋ ደራማ የሰራሉ እግዜር የስራቸውን ይስጧችው ግሞች	1
አፍንጫ ጎራዳ ሆነሽ ጠየም ካለሽ ትንሽ ከንፈርሽማ ወፍሮ ጸጉርሽ ከርደድ ካለ በቃ አንቺማ ጋና ነሽ ነበር የሚሉን ባርያው ወይም ሻንቆ ደግሞ የቤት ስምሽ	1
የኛ ሴቶች የዘመናዊነት መገለጫ ና ስኬት አድረገው የሚቆጥሩት ከነጭ ጋ ወይም ከአፍሪካ ሊሆን ይችላል ስትጠብስ ነው	1
እና የበግ ወጥ በሬ በሬ እንዲልልሽ ነበር የፈለግሽው	1
ፋራ የመንደር ዱርዬ ስራ ፈተን አንተን ስንከተል አልታየህም ምድረ ዱቄት እኛ ብዙ ስራ አለብን ኮተት	1
ሰው እንዴት አያስብም እንዴት ከስህተቱ አይማርም ይኸው ከአብዲ ኢሌ በፊት ጀምሮ እስከ ዛሬ እንደተሳሳተች አለች	1
አንች ከብት እኔ የማንን ዘር እንደምደግፍ እምትመክሪኝ አንች ነሽ ኦሮሞን ወክለሽ ተራገጭ ብዙ ደጋፊ ስላለው አላለችምሊጥራስ ቄቢያም ለምን ቆዳሽን ገፈሽ ለቄሮ አትሰጭውም	1
ታሪክ አድርጎ እንዲያስመዘግበው ለምን ጭገርሽን ቆርጠሽ ሸርበሽ ለጅዋር አትሰጭውም ሹርባ እንዲሰራበት ኋላ ቀር ማህይሞች መቼም አትሰለጥኑም	1
የማንነት ቀውስ ውስጥ ካሉ ሰዎች የመጀመሪያዋ አስቴር በዳኔ ነት እጅግም ታነድደኝ ነበር	1
ልጅቷ እኮ ምንም ስርአት የላትም	1
ባንቺ መርፌ ለመሰካት ያልፈሩ ባልተማረው ላይ ምን እንደሚሰኩ ፈጣሪ ይወቅ	1
አንተ ቅል ራስ ጭንቅላትህ ልክ እንደውጪው ውስጡም ባዶ ነው	1
አንተም ተዘጋጀ የአነተም ጸጉር አያልፍም ምነው አላየህውም እንዴ ጸጉርህ መመለጥ ጀምሯል	1
ህገመንግስት ላይ አለ የለም የሚለውን ዛዛታ ተውትና አረመኔው እስላሙ ፈላሻው ማንን ነበር	1
ምን ታድርጊ አንቺ ፈንጪ እንጂ ልክ ደካመ የተገኘ ይምስል	1
ቆንጆ ድምጽ ያላቸው ሴቶች በፍቅር ለመባለግ ተጋላጭ ናቸው	1
እቺ ጉማሬ ሰሞኑን ምነው ዝም አለች	1
የሷ ዘረኛነት የተሞላበት ስድብ ያዝናናኝ ጀምሯል	1
ሙስሊምሴቶች አስመሳይ ዱቄታሞች ናቸው ክርስቲያን ሴቶች ግን ከነ ብልግናቸውም ቢሆን ጨዋ እና ቀሽቲ ናቸው	1
ወንድ ማለት እኮ ቄቤ ወተትነው በጥቅላላ ከብት ነው	1
ለዚ ለጠንቋይ ልጅ ያለኝ ክብር በዚ መልኩ ነው የምገልጸው	1
ምነው ኢቺ ጋላ እምነት አልባ ዋቄ ፈታ ልጅ ምነው ያዙኝ ልቀቁኝ አለች አንቺ ቆሻሻ የበሰበስሽ የሽንት ቤት ትል ያ በስፐርም ጥማት ትሎቹ የሞቱበትን ቂጤን ላሱልኝ ብዱልኝ ሰልጀሪ አሰሩልኝ አልሽ አንቺ ጥንብ ቦቲያም ስርአት ያዥ ካልሆነ ግን ዛፍ ላይ ስቀቡት የነበረውን የ ከብት ቅቤ እየቀባሁ ነው ቂጢሽ እስከፈራርስ በእንጨት የምጎረጉርሽ ደሞ ይቀጥላል ድንዝዝ ነገር	1
ዳቦ ስጭኝ ስልሽ ደፍተሽ ያመጣሽው እግዜር የደፋውን ወዴት አደረግሽው	1
ንገሪልኝ እስቲ ለዚህ ምድረ ኮተት	1
ኢትዮጵያውያን ሴቶቹ ማሰብ አይችሉም ወንዶቹ የሚያስቡት ደግሞ በተሳሳተ መንገድ ነው	1
ወንድ እና ድመት አንድ ናቸው የራሳቸውን ማንም እንዲነካባቸው አይፈልጉም	1
አንተ የሆንክ ሻንቂላ ደደብ ቱ ደሞ ትሳደባለህ ሀሀሀሀሀሀ ተው ሰው እንዳይሰማህ መቸም ቆጆ ነህ ማለት ይደብራል እና ይሄን ጭፍን አይንህን መጀመርያ ግለጥ እሽ	1
አማራ ድሮስ ሴት እና ህጻንን እንጂ ሱሪ የታጠቀ ወንድ እማ ሲያይ መሳሪያውን ጥሎ ይፈረጥጣል	1
ወይዘሪት ጋላ ትባላለች ተዋወቋት	1
የኦሮሞ ሴት ለግርድና እንጂ ለትዳር አትመጥንም	1
የትግራይ ሴቶች መጠጣት ሰራችውነው ምድርቃፋፊ	1
እቺ ሸርሙጣ ወሎዬ እርምጃ ተወስዶባታል ኦሮሞን እና ትግሬን ስታንቋንሽሽ የምትውል ናት ስልኳን	1
ሸሌዋ ፍሬህወት ታምሩ የአብይ የጭን ገረድ መሆኗን በታላቅ ውረደት አሳይታለች	1
ከጎጃም ሴት የወሎ አህያ ትሻላለች ይባላል ምክንኛቱ ምድነው	1
እውነት እውነት እላችኋለሁ ከሴቶች ወንዶች ይሻሎኜል ቀናተኞች ናቸው ሴቶች	1
ወንድ ልጅና ውሻ አንድ ናቸው ሁለቶችም ሆዳቸወን ይወዳሉ	1
ደሞ ሙያ እንዳላት ሴት ዘለሽ መጥበሻ ለይ ፊጥ ማለትሽ መጀመሪያ ሙያ ልመጅ	1
ሴቶች ከወንዶች ይልቅ ስጋቸውንም ነፍሳቸውንም ማጠብ ያዘወትራሉ	1
ይሄ የችኮች ሴራ ነው	1
ውሻ አንተ ወንዳገረድ ታገቱ አለ እሺ ብዬ ሰማሁት ከታገቱት ዱ ተለቀቁ አለ ጎዴፈላ ደነገጥኩ	1
ስንት ወልደሽለት ነው ወይስ ቅምጡ ነበርሽ እቺ የሌባየሸርሙጣ ልጅ	1
አንቺ ግማታም ሸታታ ሸርሙጣ አለሽ እንዴ ቆማጣ የቆማጣ ልጅ አንብበሽ እርር ቅጥል ስለምትይ ብሎክ ብታደርጊ ባታደርጊ አይደንቀኝም ከአንቺ አይነቱ ጋር መቆጠራችን ያሳዝናል	1
ቆሻሻ ቁራ ወያኔ አንቺ ነሽ እሷ እንዳንቺ ሸርሙጣ አይደለችም	1
አንተ ግም የሸርሙጣ ልጅ የደርግ ወደል ውሻ	1
የወንድና ሴት ብልት ያላቸው ፍናፍንት ሴተኛ አዳሪዋ ፊልም ልትሰራ ስትል ታዋቂ አርቲስቶች ሴትነቷን ጠየቋት	1
ደንበኞችን ለመሳብ በሚል በከፊል እራቁታቸውን የሆኑ ሴተኛ አዳሪዎችን አንድ ላይ የሰበሰበው የወንዶች ጸጉር ቤት በኢንተርኔት መነጋገሪያ ሆኗል	1
የሴቶች ቀን የማያስታውሰው ሴተኛ አዳሪነት ከኢትዮጵያ ህግ አንጻር	1
ኡጋንዳ እና ቦትስዋና በሴቶች አለባበስ ላይ ደስ የሚል ህግ አላቸው በተለይ የመንግስት መስራቤት ለይ በሚሰሩት ሴተኛ አዳሪ መስላ ስራ የምትገባ ካለች አለቀላት	1
ለልጇ ስትል ሴተኛ አዳሪ ሆና የነበረቺው ሴት ህይወት	1
አንድ እራሷን በሴተኛ አዳሪነት ስታስተዳድር የነበረች ሴት የልጆቿን አባት የማታውቅ አሮጊት ስለ ጃዋር አወራች ብላችሁ ጮቤ ስትረግጡ ትንሽ	1
ወይ ሴተኛ አዳሪ ነሽ አልያም የሴትኛ አዳሪ ልጅ መሆን አለብሽ	1
ሰው ሴተኛአዳሪነት መጥፎ ነው ቢል በሌላ በኩል የሴተኛ አዳሪ ፈላጊ መኖር ሽርሙጥናን ትክክል ያደርገዋል	1
አማራ በሽርሙጥና በሴተኛ አዳሪነት የተገኙ ዝሪያዎች ስብስብ ነው	1
እምስ መላስ ሴትን የሚያከብር ቢሆን ሴተኛ አዳሪ ተብለው ገላ ቸርቻሪ ሸርሙጣ ሸሌ የሚባሉት ሴቶች ይከበሩ ነበር	1
ከሁሉ ይገርመን የነበረው አልከፍልም አለኝ እያሉ አገሩን በኡኡታ የሚያቀልጡት ሴተኛ አዳሪዎች ናቸው	1
አማራ ሁሉን ነገር ወደ ሴክስና ሽርሙጥና የማዞር ብቃቱ ከፍተኛ ነው የአዲስ አበባን መንገዶች በአማራ ሴተኛ አዳሪዎች መሞላት የዚሁ ውጤት ይሆን እንዴ	1
እንዳንተ ያለው ሸርሙጣ የሸርሙጤ ልጅ ብዙ ቢያወራ አይፈረድበትም አሁን አንተ የሴተኛ አዳሪ ልጅ እንጂ ሌላ ምን ስም አለህ ምንህ ይሰበራል	1
በትግራይ የተደፈሩ ሴቶች የሉም እያለች ነው ታዲያ ከሴተኛ አዳሪ ልጅ ምን እንጠብቃለን	1
ለመድፈር አለባበስ ብቻውንበቂ ባይሆንም ሁሉም ነገር አንጻራዊ ስለሆነ ፍጹማዊ መፍትሄ ባናደርገው የሴተኛ አዳሪ እህቶቻችንን አለባበስ ምንን ያመለክታል	1
አንተ የሸርሙጣ ልጅ የአረብ ዲቃላ አንድ ነገር ልንገርክ መቼም ምኞትክ አይሳካም ለማየት ያብቃክ	1
ስሚ አንቺ ሸሌ የእናትሽ እምስ ነው አሸባሪ አንቺ የሸርሙጣ ልጅ	1
የአማራ ወጣቶች በኦሮሞ አውሬ ታግተው እየተደረጉ ይቺ ቆማጣ የእንጭቅ ልጅ ለባሏ አህያ ዘመዶች ትምህርት ቤት ትከፍታለች ሸርሙጣ	1
አንቺ ሸርሙጣ ከአንቺ በላይ ሸርሙጣ አለ እና ነው ለዚህ ቆሻሻ ንግግር ድጋፍ የምትሰጭው	1
ይህ ወሸታም እናቱ ቤሴተኛ አዳሪነት አሳደጋው ለኢትዮጵያ ህዝብ ቁማር ይጫወታል ገና የሱን ደም ማፍሰስ አለብን ይህ የሸርሙጣ ልጅ	1
ብስብስ ሸርሙጣ ከተዘረፈው ብር ደርሶሽ ነው ወይስ ለአንዱ የህወሀት ሌባ ጭን ገልበሽ የሌባና ገዳይ ጠበቃ ለመሆን የዳዳሽ	1
አንቺ ነሽ ስራ ፈት ገደል ግቢ አመዳም ሁሌ ስትቀባጥሪ ዝም አልንሽ አልከበርም አልሽ አንቺ ብዳታም ሸርሙጣ	1
አንተ ሸርሙጣ የሸርሙጣ ልጅ ነህ ከሸርሙጣ ልጅ ምን ይጠበቃል	1
ሸርሙጣ ለዚህ ጥንባታም ግም እምስሽ ጊዜ ሰጥተሽ እንደመታጠብ ያልበላሽን ታኪያለሽ እከካም አሁን አንቺም ጋር የሚተኛ ወንድ ይኖራል	1
የሀበሻ ሴቶች ቂጣምና ሴታሴት ወንድ ያስጠላል ሲሉ ወንዶች ተናደው የሰጡት አስቂኝ ምላሽ ከፍቅር ቀጠሮ	1
የዲሲ ሀበሻ ወንድ ሴታሴት ነው እህቶቻችን አሜሪካን ሀገር ለመጀመፘ ጊዜ ሲገቡ በተቀባዮቻቸው የሚመከሯቸው ምክሮችን ተመልከቱ	1
ሴታሴት ወንድ ሆኖ እንደሴት የሚያወራ እንደሴት የሚራመድ ቀጭን ድምጽ ያለው	1
እውነት ከሆነ እናቴ ስትሰማ ምን ልትለው እንደምትችል አሰብኩት የግሸኗ እናቴ ነይልኝ ድሮም ሴታሴት ነበር አሁን ደግሞ ሴትነቱን በይፋ አወጀ	1
ለዘመኑ ሴታሴት ወንዶች እና ወንዳወንድ ሴቶች	1
የዛን የቆጨራ ሴታሴት ንግግር ገና አሁን ሰማሁት በተለመደው ፈሪነቱ ጥያቄ ሊጠየቅ በማይችልበት መድረክ ፍሬቢስ አሽሙርና ዘለፋ ነው	1
አንተ ቅዘናም በጭባጫ አፍ አለኝ ብለህ ታወራለህ ሴታሴት ውሻ	1
ሴትን ገሎ ጀግንነት የለም ህጻናትን ገሎ ጀግነት የለም አቅመ ደካማን ገሎ ጀግነት የለም ጀግና ህሊናውን የሚያሸንፍ ፈጣሪን የሚፈራ ነው ሴታሴት ቡሽቲ	1
እንዳንተ አይነቱን ሴታሴት አቃጣሪ ወንድ በሳማ ነበር	1
እስክንድር ነገ ሰፈር ለሰፈር የሚዞር ሴታሴት ሆኖ ቀረ አሁን የቀረው የወር አበባ ማየት ብቻ ነው	1
ወንዳወንድ ሴቶች ብዛት ከወንድ ጋ አጉል ጀለስ ናቸው ሴታሴት ግን ሴቶች አይጠጉትም ጭራሽ	1
ሴታሴት ወንዶች አዎ ፈሪ ነበራችሁ	1
የሆንክ ሴታሴትና ቱልቱላ ነገር ነክ	1
በሴቶች መሀል የሚገባ ሴታሴት ወንድ አይመቸኝም እስኪ እንደወንድ ሁነህ ወንድ ምሰል	1
አንተ ደግሞ ለቃቃሚ ሴታሴት ወንድ ሆነሀል	1
ዘንድሮኮ ወንዱ ሁላ ስራ ሲፈታ ሴታሴት ሆኖ አረፈው	1
አንተ የሸርሙጣ ልጅ ቁጭ ብለህ ሴት ጋ ትሳደባለህ አይደል ሴታሴት	1
ተነስቶ እንደገና ቢሞት ይሻለዋል ይሄ ሴታሴት	1
ወንዶች ከራሳቸው በላይ ቆንጆ የሆነ ወንድ ሲያዮ እዩት ይሄን ሴታሴት	1
ስራፈት ሴታሴት ሩቅ ሆነህ ያልተከናወነ የፈጠራ ወሬህን ከምትሰልቅ እንደ ወንዶቹ ገብተህ አትዋጋም ነበር ደደብ ሽንታም	1
አንተ ደንቆሮ የታዬ ተላላኪ የሸርሙጣ ልጅ ከአሁን በኋላ ትንሽ ሰው ስለሆንክ ከአንተ ጋር አላወራም ተራ ተላላኪ ነህ ሴት ያሳደገህ ስለሆንክ አውራ እኔ ወንድ ነው ያሳደገኝ አልሳደብም	1
ታዬ እና አንተ ሁለታቹህም አንድ ናቹህ ተራ የመንደር ተላላኪ የሸርሙጣ ልጅ ናቹህ ሽንታም ከአልጋ ስር ተኝተህ የምትውል ባንዳ ደንቆሮ ነህ የእኔ የአርበኛ ልጅ ነኝ እኔም አርበኛ ነኝ	1
ምንድነው ወንዳገረድ አንተ ደግሞ አንተ የሆንከውን ሰው ሁሉ የሆነ ይመስልሀል	1
ወንዳገረድ እንትንም እንትንም ያለው ነው መሰል	1
እሷ ምን ታድርግ ገና ተጀናጅና እንኳን ሳትጨርስ እዚህ ሀላፊነት ላይ ሾሟት የሆነች ወንዳገረድ ነገር	1
አንተ አምልጦኝ ነው ትላለህ በሀላ የሂዩማን ተጠቃሚ ወንዳገረድ	1
ወንድማ ቢሆን አቃጣሪ አይሆንም ነበር ይሄ እንዳልከው ወንዳገረድ ነው ሽንታም የሽንታም ልጅ	1
አንድ ቡና አጣጭ ወንዳገረድ ተጨምሯል ለማለት ነው	1
ወንዳገረድ እና ሴት እየለየን እንጂ ጸዲ ሁለቱም እንዳላት ተረጋግጧል ለዛ ነው ሾጥ የሚያደርጋት	1
ቤቲ ስለምትባለው ቄሪትሴት ቄሮብዙ በተወራ ቁጥር የማይገባትን እውቅና እያገኘች ነው እሷም የምትፈልገው ይህንን ነእ ይቺን አሳዳጊ የበደላት የጃዋር የጭን ገረድ እውቅና መንሳት ይሻ	1
ሴቶች ግን ብር አምላካቸው ነው ሴቶች ብር ያለው ወንድ ሲያዩ እንዴት እንደሚያረጋቸው እኮ ውይ ውይ ይላሉ ወንዶች ደሞ ማንኛዋንም ሴት ብር ካለህ እንደ ከብት እነዳታለሁ ካልክ	1
ሴቶች ግን ብር አምላካቸው ነው ሴቶች ብር ያለው ወንድ ሲያዩ እንዴት እንደሚያረጋቸው እኮ ውይ ውይ ይላሉ ወንዶች ደሞ ማንኛዋንም ሴት ብር ካለህ እንደ ከብት እነዳታለሁ	1
ሴት ልጅ ሚሊየነር ታደርግሀለች ግን መጀመሪያ ቢሊዬነር ከሆንክ ነው	1
ቺኮችዬ ለሴት ልጅ ዋናው መልክ ነው ጸባያቸው በዱላ ይስተካከላል	1
ኤጭ አሁንስ ወንዶች አስጠሉኝ የሚቀርቡኝ ሁሉ ለሴክስ ብቻ ሆነ ነይጋደም እንበል የሚሉት	1
አባቱ እናቱን ቂቤ በጠገበ ዱላ እየደበደበ ያንቺ ቦታ ማድቤት ነው ሲል እየሰማ ያደገ ሰው የኢቲዮጲያ ሴቶች ሁላ እንደዛ የሚኖሩ ይመስለዋል ሲጀመር ኢቲዮጲያ ውስጥ ሴቶች ላይ በደል የሚያደርሱት የደነዘዙ ወንዶች ናቸው	1
ሴቶች ከወንዶች ይሻላሉ ሳይሆን ይበልጣሉ	1
በህንድ ወንዶች እና ሴቶች ሴት ልጅ በባሎ መደብደብ አለባት ብለው ያምናሉ የሚል ጥናት ወጣ	1
ሴቶች ከወንዶች ይልቅ ይሸታሉ	1
ሴት እኩልነትዋን ለማሳየት ስትጥር ወንድ ለመሆን ፈልጋለች ማለት ነው	1
የሰው ልጅ ከእንስሳ እንደመጣ የሚገመተው የአንድ አንድ ወንዶች መረን የለቀቀ ባህሪይ በማጥናት ነው	1
ወንዶች ቆሻሻዎች ናቸው	1
እዛ ማዶ አንድ ዳኛ እዚ ማዶ አንድ ዳኛ የሀበሻ ወንዶች የቦርጭ መገኛ	1
ኛው የአለም ጦርነት በሴቶች እና በወንዶች መሀከል ነው የሚሆነው	1
ሴቶች ግን ምን ሆነው ነው ከወንዶች እኩል ካልሆን የሚሉት	1
ሴቶች ከወንዶች እንደሚሻሉ የሚገባህ ሴት አክቲቪስት እንደሌለ ስታይ ነው	1
አል ኒሳ ሴቶችን ምቷቸው ይላል	1
ሴቶች ከወንዶች ይልቅ ለምን የተረጋጉና ረጅም እድሜ እንደሚቆዩ ታቃለህ አታውቅማ ሚስት ስለሌላቸው ነው	1
አንድ አንድ ሴቶች በመልካቸው ወንዶች ደግሞ በብራቸው ይኮራሉ እኛ ብሩን ጥረን ግረን እናመጠዋለን እነሱ ደሞ በተፈጥሮ ያገኙትን መልክ ተጠቅመው ሙድ ይይዛሉ	1
ወንዶች መሞት አለባቸው	1
አሁን ያለን በወንዶች ለወንዶች ጥቅም ነው	1
በኛዋ ምስኪን ሀገር ወንዶች ሲራገጡ ስርአት ያፈርሱና ዳፋው ለሴቶች እና ህጻናት ይተርፋል	1
ለወንዶች ፊት ከሰጠሻቸው አናትሽ ላይ ይወጣሉ	1
ፌሚኒዝም ከወንዶች አንጻር መቀንቀን የለበትም ወንድ የእናቱ ሚስቱ እህቱና ልጁ በደል ያመዋል ያገባዋል የጭቆናው ምንጭ ወንድ ሳይሆን ባህል ነው	1
ወንዶች ናቸው ስሜታቸውን መቆጣጠር የማይችሉት	1
ወንድ የሴት እርዳታ ጠይቆ አለምን ቢገነባ ሴቶች አይጨቆኑም ነበር ወንድ ግን ሴቶችን እንደ ቶይ የሚጨወትበት አለም ነው የገነባው	1
ሰው በመሆናችን እኩል ተስተናጋጅነት ይገባናል ስንል ፌሚኒዝም የበላይነት እንደሆነ የሚያስቡ ይኖራሉ	1
ሴቶች በባህላችን ለወንዶች ምንዝር ናቸው	1
ዋነኛ የሴቶች ምስጢር ጠባቂ ሜክአፕ	1
ከሚስትህ ሚስቴ ትበልጣለች	1
በወሊድ ምክንያት ለሚሞቱ ሴቶች ያስረገዙት ወንዶች ለምን ተጠያቂ አይሆኑም	1
ገዳ ለወንዶች የሚያደላ የሚያደላ ሴቶችን የሚያገል ስርአት ነው	1
ወንዶች ህይወትን በጊዜ ሲያውቁ ሴቶች ግን አርፍደው ነው	1
ሴቶች ስላደረጉት ወሲብ ሲጸጸቱ ወንዶች ደግሞ ስላላደረጉት ወሲብ ይጸጸታሉ	1
ወንዶች አያስታውሱም ሴቶች ደግሞ አይረሱም	1
ሴቶች ከአንድ ወንድ ብዙ ነገር ሲፈልጉ ወንዶች ደግሞ ከብዙ ሴቶች አንድ ነገር ይፈልጋሉ	1
ሴቶች የወሲብ እርካታ እንዳገኙ መስለው ሲሸውዱ ወንዶች ደግሞ የፍቅር ግንኙነትን የእውነት አስመስለው ይኖራሉ	1
ወንዶች ሴትን ሲያዩ እንደ በግ ያደርጋቸዋል	1
እዚህ አገር እንኳን መውለድ መወለድ ያልነበረባቸው ወንዶች አሉ	1
ሴቶች የበላይ ናቸው እናም ወንዶች ሁሉ መገደል አለባቸው	1
ዘንድሮ የኢትዮጵያ ወንዶች ፈልቶባቸዋል	1
ሴቶች ሴቶች ከወንዶች ጋር እኩል ነን ይላሉ ግን አንድን ወንድ ፈሪና ደካማ ለማለት ሲፈልጉ ሴታሴት ይሉታል	1
የሀበሻ ወንዶች መቀጥቀጥ ነበረ	1
የኢትዮጵያ ወንዶች መቼ ነወቀ የሚሰለጥኑት	1
ፌሚኒስቶች ለሁሉም ነገር ወንዶችን መውቀስ ይወዳሉ	1
እዚ ማዶ አንድ ቆርቆሮ እዛ ማዶ አንድ ቆርቆሮ የሀበሻ ወንዶች ምድረ ደንቆሮ	1
ወንዶች እኮ ውሻ ናቸው	1
ወንዶች ሆዳቸውን ይወዳሉ	1
ይህን ያውቁ ኖሯል በአለም ላይ ካሉ ሴቶች ቱ ብቻ ይጫወታሉ የቀሩት ቶቹ በወንዶች ህይወት ነው ሚጫወቱት	1
ለሴቶች በሽታ ሁሌም መነሻው ወንዶች ናቸው	1
ወንዶች እና ሴቶች አንድ የሚያመሳስላቸው ነገር አለ ሁለቱም ሴት አያምኑም	1
የወንድ ረዥም መኳንንት የሴት ረዥም አጋንንት	1
ወንዶችን እጠላለሁ በጣም እጠላቸዋለሁ እነሱን ሳያቸው መሞት እፈልጋለሁ ደሜ ሲፈላ እና አይኖቼ ሲፈሰሱ ይሰማኛል የደም ግፊቴ ከፍ ብሏል እናም ጥላቻ መላ ሰውነቴ ሞልቶታል	1
የአበሻ ወንዶች እንደ እንቁራሪት ያንቋርራሉ	1
ወንዶች ሰለቹኝ አስጠሉኝ መረሩኝ	1
ቆንጆ ወንዶች ውበት ብቻ ናቸው	1
ወንዶች ልብ መስበር ላይ በጣም ጎበዝ ናቸው	1
ወንድ የሴት ምንትስ እና ጡት ብቻ ነው የሚያየው	1
ድሮም ወንዶች ስትባሉ አንድ አይነት ናችሁ	1
የሴቶች ቀን ማርች ነበር የሚከበረው እና ቀን ሙሉ ሲኳኳሉ ቆይተው ማርች ላይ ነው ጨርሰው የውጡት አሉ	1
አንተ ቡሸቲ የባንዳ መለኪያዎች ከኤርትራ ሱማሌ ፎጣ ለባሸ ተሰብሰበህ መጥተህ እንደ ጀግና ታያለህ የሚገርመው እንኳን ጦርነት ላይ ብቻ አንተንና መሰሎችህንም እንጠርጋሀለን የሸርሙጣ ልጅ ጠብቅ	1
ምን ያህል ቢጠማሽ ነው እንደዚ ሽርሙጥናውን ቲውተር ላይ የተቆጣጠርሽው ፈጣሪ ይታረቅሽ	1
ጉድ በልአርተፊሻል የሴት ቂጥ ሴቶች ወንዶችን ለማማለል በከተማችን በወንዶች ኧረ ጉድ ፈላባቸው	1
እውነት ለምንድነው ግን ወንዶች ትልቅ መቀመጫ ያላትን ሴት የሚወዱት	1
የሴቶች ትልቁ ችግር ያወራቸው ያያቸውሁሉ ሚወዳቸው ይመስላቸዋል	1
ለምን ይሆን አብዛኞቹ ሴቶች አሁን አሁን ፓንት መልበስ የቀነሱት ወይንም ጭራሽኑ ያቆሙት	1
ሴቶች ፍቅርን መስጠት ልመዱበት ጠቃሚ አጭር መልእክት	1
ሴቶች ራሳቸውን በመወሰብ ያረካሉ ባሌን እያሰብኩ በወሲብ ራሴን በራሴ አረካለሁ	1
ቆንጆ ቆንጆ ሴቶች ለምን ባለጌ ወንዶችን እንደሚወዱ የገለጹበት መንገድ በጣም ገራሚ ነበር	1
ለሴቶች ብቻ ትልቅ ዳሌ እንዲኖራቹ ትፈልጋላቹ እውነት ለምንድነው ግን ወንዶች ትልቅ መቀመጫ ያላትን ሴት የሚወዱት እንግድያውስ	1
የአባ ኮስትርበላይ ዘለቀስም ሲነሳ ያመኛል ምክንያቱም የአሁን ዘመን ትውልድ ብቻ ልተወው ታጋይ ይሞታል ትግል አይሞትምነውና	1
የምትናገርበት ምላስ እንጂ የሚያስብና የሚሰማ ጆሮ ስለሌለህ እንደ አበደ ሰው ሁሉንም ነገር ነካካ	1
አንተ ደግሞ ምን አይነት ደደብ ነህ እኔኮ አስተዋይ ነበር የምትመስለኝ ሁሉንም ነገር አማራዊና ክርስትያናዊ ግንኙነት እና ይዘት ብቻ ያለው ለማስመሰል ትሞክራለህ ሚዛናዊ ለመሆን ትሞክራለህ ግን ወገንተኛ ነህ	1
መጀመሪያ ሚዛን የሳተውን አስተሳሰብሽን አስተካክዪው ስለ ሀገር ምታስቢ ከሆንሽ ስለ አቀረበው ሀሳብ ነው ነው ልታወሪ ሚገባው አንጂማ አንቺም አዛ አሉባልታ እየለቃቀመ የሚያወራው ጉማሬ ጋር ስትሄጂ ለምን ሄደች ሳይሆን ሄዳ ምን ፌሬ ሀሳብ አነሰች ነው ያልነው እና ስለ ህግም ሆነ ስለ ፖለቲካ አቅም አለኝ ካልሽ የልደቱን ሀሳብ በሀሳብ ሞግቺ አሉባልታሽን እዛው ተዪው ሌለው ልደቱ መቀሌም ሄደ ሰላሌ አቋሙ አቋም ነው መቀሌ ሄዶ ያረገውን ንግግር ካልሰማሺው ፈልገሽ አዳምጪው ኦነግንዋቹንእንዲም ህውሀትን በሜዳዋ ሲያንጠባጥባት ታያለሽ ያኔ ልደቱ ይቅር በለኝ ማለትሽ አየቀርም ማለትም ጥሩ ህሊና ካለሽ	1
ይሄ ሰውየ ተንኮሉን ካላቆመ ፖሊስ ብለቀውም ኮሮና አይለቀውም	1
በናተ ዘበን እውነት የተናገረ ይጠላል አይደል አንተ እበት	1
ያልተገረፈው እኮ ቂጡን እየደከሉት ስለነበር ነው ለዛ ነው ቂጡን ሲበላው ሲያከው መቀለ ሄዶ ውዳሴወያኔን ጊዜ ደግሞ ቡራኬውን ከደጺዮን አግኝቶ በጌታቸው አሰፋ ተደክሎ ነው አሉ የሚመጣው	1
ሰው እንዴት የበታችነተ ስሜቱ ከቁጥጥር በላይ ሁኖ በአደበባይ ያወጣል ከፈሪም በላይ ቅዘናም	1
ሀፍረት የሌላት የሴት ሰገጤ አይሻባችሁ አኡዙ ቢላህ አንዳንድ አቅማቸውን የማያውቁ ደናቁራን እንስቶች አሉ የሴት ልጅ ውበቷ ሀያእዋ እንጂ ክፍት አፍነቷ አይደለም	1
ሴት ማለት የሴክስ ማሽን እና የሰው ጫጩት መፈልፈያ ናት	1
ሴት ንፍጢት	1
የትግራይ ሴቶች መጠጣት ሰራችው ነው ምድር ቃፋፊ	1
ስንት ወልደሽለት ነው ወይስ ቅምጡ ነበርሽ እቺ የሌባ የሸርሙጣ ልጅ	1
ቤቲ ስለምትባለው ቄሪት ሴት ቄሮ ብዙ በተወራ ቁጥር የማይገባትን እውቅና እያገኘች ነው እሷም የምትፈልገው ይህንን ነእ ይቺን አሳዳጊ የበደላት የጃዋር የጭን ገረድ እውቅና መንሳት ይሻ	1
ኤጭ አሁንስ ወንዶች አስጠሉኝ የሚቀርቡኝ ሁሉ ለሴክስ ብቻ ሆነ ነይ ጋደም እንበል የሚሉት	1
ጉድ በል አርተፊሻል የሴት ቂጥ ሴቶች ወንዶችን ለማማለል በከተማችን በወንዶች ኧረ ጉድ ፈላባቸው	1
የሴቶች ትልቁ ችግር ያወራቸው ያያቸው ሁሉ ሚወዳቸው ይመስላቸዋል	1
በመንገድ ላይ ስትሄድ አንድ ሰው ቢነካህ ምን ታደርጋለህ	1
ጣፋጭ ሕፃን	1
እሷ አስቀያሚ ነች እና እሱ የሚወዳጀውን የሴት ልጅ አይነት ደረጃ አታሟላም	1
ቆንጆ ሃሎ ማለት ብቻ ነው የምፈልገው እና ምን ያህል ለስላሳ እንደሆንክ ይሰማኛል	1
አንተ ሴሰኛ ነህ እና እናውቃለን	1
እነዚህ እንደ ብርቱካን የበሰሉ ናቸው	1
ሄይ ቤቢ	1
ሴት ልጆች ኩባያ	1
የእርስዎ ቦታ ወይም የእኔ	1
ልበዳችሁ እፈልጋለሁ	1
ትላልቅ ጡቶች	1
ተመልከት የሴት ጓደኛህ እየመጣች ነው	1
አንቺ ልጅ እዚህ ትመጣለች	1
ሄይ ይህች ልጅ በከተማ ውስጥ ያለህ ብቸኛ ልጅ እንደሆንክ ብዙ ትጠይቃለህ	1
ወንዶች ልጆች ከሽንት በኋላ እጅን መታጠብ አያስፈልጋቸውም አይደል?	1
እኛ ለሴቶች አካላት እንጠቀማለን	1
በእግዚአብሔር ሰላምታ እየተኩራራችሁ ነው እና አንተም ቆንጆ አይደለህም	1
እንደ ቺንኪ ባሉ አንዳንድ የአካባቢ ስሞች ተጠርተናል	1
ግብረ ሰዶማውያን የሰውን ፍንዳታ ሰበሰበ ማስቀመጥ	1
ያ እምስ ይቀዘቅዛል የበሰበሰ ንክሻ ትንሽ ባስታርድ	1
አንተ የሰባ ስብ ስብ ነህ	1
ለምን በመስኮት እየዘለለ እንደሆነ ጠይቁት እና በእነዚያ ጥብቅ አህያ ጂንስ ውስጥ እንዴት እንደሚያደርገው ጠይቁት???	1
አንተ መንፋት የምትወድ ሰው እንደሆንክ ግልጽ ነው	1
እግሮችዎን መንካት እፈልጋለሁ	1
እንደማላገኝ ማድረግ እፈልጋለሁ እንደምወደው የማውቀው መጥፎ ነገር ነው	1
እኔ ሁላችንም ለዚህ የሴቶች መቅጠር ነገር ነኝነገር ግን አንድ ነገር ማድረግ ባልቻላችሁ ቁጥር ሶስት ወንዶቼን የሚያስከፍለኝ ከሆነ አይደለም	1
ሴቶች በቤት ውስጥ የጽዳት ወለሎች ውስጥ ነበሩ	1
ትናንት ማታ ከእናንተ ጋር የግብረ ሥጋ ግንኙነት ፈጽሜያለሁ	1
ምን ትላጨዋለህ?	1
የእኔን ፖርኖ ወደውታል?	1
ለጢም ትሞቃለህ?	1
ምን ያህል ስብ እንደሚያገኙ ገንዳ እየጀመርን ነው	1
በደረጃው ውስጥ ልወስድህ እፈልጋለሁ	1
ዋው እና አሁንም እርጥብ ህልም ያለኝ እኔ ብቻ ነኝ ብዬ አስቤ ነበር	1
በምትተኛበት ጊዜ ልመለከትህ እችላለሁ?	1
ጡቶችዎ ትልቅ ናቸው እና ምናልባት ምንም እንኳን አልተሰማዎትም	1
እዚህ ለመስራት በጣም ሞቃት ነዎት	1
ቆንጆ ጡቶች	1
ወደ ቦታዬ ና እራት እይዛችኋለሁ	1
ታውቃለህወጣት እና የሚያምር አህያ እስካገኘህ ድረስ የሚጽፉት ነገር ምንም ለውጥ የለውም	1
እንደ ውሻ አታለለችው እና እንደገና ታደርጋለች	1
ክብደት ስጨምር ያንን ምስል አስባለሁ	1
እኔ እንደማስበው አንዳንድ ሴቶች ከሌሎቹ የበለጠ ቆንጆዎች ናቸው ፍጹም ታማኝ ለመሆን እና ለፖለቲካ ሹመት መወዳደር እንደሌለብኝ እድለኛ ነው	1
አንተ በእርግጥ ኬክ አይደል?	1
ማን ለማስደመም እየሞከርክ ነው?	1
ተፈጥሯዊ ከሆነ በጣም ቆንጆ ትመስላለህ	1
እንደገና እንደምትደፈር ተስፋ አደርጋለሁ	1
ሄይ ልጃገረድ በውስጣችን ትልቅ ጥቁር አለህ?	1
ላገባህ እፈልጋለሁስለዚህ እባክህ ጨምርልኝ	1
ጣፋጭ	1
ቁርጥራጭ	1
በጣም ስሜታዊ ናቸው	1
ስራውን ያገኘኸው ሴት ስለሆንክ ብቻ ነው	1
እሷ በእርግጥ ያን ያህል ጥሩ ነበረች ግን እሷን ማቆየት ፈልገው ነበር	1
ለሴት ልጅ ይህን ያህል ጥሩ ታደርጋለህ	1
ቆንጆ ትንሽ የጎን ምት	1
ወደላይ እና ወደ ታች አይኗታል	1
በቀድሞ ሥራዬ ሥራዬ ሥራ ያለኝ አለቃው ስሜቴ ስለነበረው ወይም አብረን ስለተኛን ወይም ጠባብ ቀሚስ ስለለበስኩ ነው የሚሉ ወሬዎች ነበሩ	1
የታሰበ የወሲብ ጥቅም	1
ጋለሞታ	1
ዝሙት አዳሪነት	1
ለገንዘብ ወሲባዊ ሞገስ	1
ትንሽ መምታት ነገሮችን ለማፋጠን ይረዳል	1
እየሰራሁ አይደለም የሚለውን ለመምታት እንደ አንድ ሰው ያዙኝ	1
በጣም መጥፎው ከ ዓመታት በፊት እርስ በርሳችን አልተዋወቅንም ነበር አብረን ብዙ መዝናናት እንችል ነበር	1
በአካል ከተገናኘን በኋላ በኢሜል ብቻ የተነገረለት የአቻ መታወቂያ እርስዎ ካሰብኩት በላይ በጣም ቆንጆ ነዎት ብሏል	1
ምን ያህል ታላቅ እንደሆነህ አያውቅም	1
የድመት ጥሪዎች እና የማለፊያ አስተያየቶች በአለም አቀፍ አውሮፕላን ማረፊያ የዴሊ ፖሊስ እኔን እና ጓደኛዬን ካሳለፋቸው አሰቃቂ ነገሮች ውስጥ ሁለቱ ናቸው በአውሮፕላን ማረፊያው ውስጥ ያሉ ጠባቂዎች እና የህግ አስከባሪዎች አንድን ሰው በጣም ምቾት እንዲሰማቸው ማድረጉ በጣም አሳዛኝ ነው	1
አንዳንድ ሰዎች በጣም ተገቢ ባልሆነ መንገድ ይመለከቱ ነበር ይህም የማይታገስ ነው በጠዋት እና በሌሊት ተከስቷል	1
የአካባቢው የኮሌጅ ወንዶች አስተያየት እየሰጡ ነበር	1
እንግዳ የሆኑ ድምፆችን ማሰማት እና በሴቶች ላይ መሳቅ	1
አይስክሬም ለመውሰድ ሄጄ ነበር እና እዚያ የሰከሩ የሚመስሉ ሰዎችን አስተዋልኩዞር ብዬ መሄድ ጀመርኩነገር ግን ከሩቅ የወሲብ ግብዣ አደረጉ	1
ወደ ፒጂዬ ስመለስ አስተያየቶች እና እይታዎች ነበሩ ከሰአት በኋላ	1
ጓደኛዬ መንገዱን እያቋረጠ ነበር	1
በመንገድ ላይ ስሄድ በብስክሌት ላይ ያሉ ሁለት ሰዎች ሴሰኛ አስተያየቶችን አልፈዋል ከሰአት በኋላ ከምሽቱ ሰዓት አካባቢ በቪሽቫቪዳላያ ሜትሮ ጣቢያ አቅራቢያ ተከስቷል	1
ከኮሌጅ ወደ ቤት ስመለስ አንድ ልጅ ስለ እኔ አስተያየት ሰጠ እና በፉጨት ተናገረ	1
በቢሮ ሰዓታት ውስጥ የወሲብ ትንኮሳ	1
ትንኮሳ	1
በጠዋት እና ከሰአት በኋላ የድመት ጥሪዎች እና አስተያየት ሰጪ የቅዱስ አውቶቡስ ይቆማሉ	1
ከትምህርት ቤት በኋላ ወደ ቤቴ እየሄድኩ ነበር እና በእግር ስሄድ አንድ ወንድ ልጅ ፊት ለፊት መጣ እና እንደሚወደኝ ነገረኝ ያንን ሰው ስለማላውቀው ችላ አልኩት ነገር ግን ያለማቋረጥ እየተከተለኝ ነበር እና ምንም አካል አልረዳኝም	1
አንዳንድ ሰዎች ከእኛ ጋር መጥፎ ባህሪ ነበራቸው	1
ወንጀለኛው የልጃገረዶችን ቡድን እያየ ነበር እና በጣም ርካሽ በሆነ መንገድ እያየ እና አስተያየት እየሰጠ ነበር ይህ ክስተት የተከሰተው ከሰአት በኋላ ነው	1
ከፒንክ ከተማ ምንም አይነት ክስተት ያልተዘገበበት ምክንያት በጣም ደነገጥኩሔቭ ማሾፍ በጣም የተለመደ ስለሆነ በየቀኑ ማለት ይቻላል በሴቶች ላይ ይከሰታልእሺ የጓደኛዬን አይነት ክስተት ላካፍልኝ በ ታዋቂ የሴቶች ኮሌጅ ውስጥ እየተማርን ነበር በጃይፑር እና በ ውስጥ እንደ ተከፋይ እንግዳ ይቆዩ ነበርሁለት ጓደኞቼ በድንገት የሆነ ነገር ለማግኘት ወደ ገበያ ወጡ መኪና መጣ በመኪናው ውስጥ ወንዶች ልጆች ነበሩ ብዬ አስባለሁከመካከላቸው አንዱ ጓደኛዬን በተሳሳተ ቦታ በመያዝ ወደ መኪናው ሊጎትት ሞከረእንደ እድል ሆኖ ሌላኛው ጓደኛዬ በመጮህ አዳናትበጣም አስፈሪ ነበር አሁንም ክስተቱን ረስታለችይህ ጉዳይ ብቻ አይደለም እንደዚህ አይነት …	1
ምሽት ላይ አስተያየት መስጠት እና ፎቶግራፍ ማንሳት ነበር	1
ወንዶች ልጆች አስተያየት እየሰጡኝ ይጮሁብኝ ነበር	1
ወደ ሥራ እያመራሁ ሳለ አንድ ሰው ሲከተለኝ አየሁመንገድ ለመቀየር ወሰንኩ እና ያ ደግሞ ሴተኛ አዳሪ ነኝ እና ወርቃማ ብልት አልነበረውም ሲል ጮኸ!!!	1
ብስክሌተኞች ይህንን በአብዛኛው ያደርጋሉ	1
የወንዶች ቡድን እዚያ ቆመው በእኛ ላይ ኮከብ አድርገው ነበር ማንቀሳቀስ ስንጀምር ከመካከላቸው አንዱ በጓደኛዬ ላይ አስተያየት ሰጠ	1
ዴስክ ላይ ተቀምጦእየሰራስራ አስኪያጁ የተወሰነ ማሻሻያ ለመጠየቅ ይመጣልየሴቶችን ደረት ብቻ ይመለከታልእንዲሁም አዲስ ለተቀላቀለች አባል ስለሷ ሳሪ ጨዋነት የጎደለው አስተያየት ትሰጣለች	1
ወንዶች ያዩኛል	1
በትምህርት ቤት እያለች ነፍሰ ጡር ነበረችወንዶች ልጆች ሁል ጊዜ ደውለው ያስጨንቋት ነበር	1
አንድ ረጅም ልጅ በየጊዜው ያሾፍብኛል ማለት ይቻላል ወደ ቤቴ መጥቶ ይደውላል እና መዝሙር ይዘምራል	1
ልጃገረዶችን የሚያሾፉ እና መጥፎ ቃላትን የሚናገሩ የሰዎች ቡድን	1
ጓደኛዬ በአውቶቡሱ ውስጥ ጾታዊ ትንኮሳ ፈፅሞ ነበርምንም እንኳን የሌላ አውቶብስ መቀመጫ ባዶ ቢሆንም አሮጌው ሰው አጠገቧ ተቀምጦ ሆን ብሎ መንካት ቀጠለ ከዛም ትዕይንት መፍጠር እና ከአውቶቡሱ መውረድ አልፈለገችም ማቆሚያዋ አልነበረም	1
አንድ ወንድ ልጅ በብስክሌት ሲሄድ በሴት ልጅ ላይ አስተያየት ሲሰጥ አየሁ ምሽት ላይ ሆነ	1
ሰዎች አስተያየት ሲሰጡፎቶ እያነሱ የእለት ተእለት ስራው	1
አንዳንድ ወንዶች መጥፎ ቃላትን ሰጡኝ	1
ምሽት ላይ አንድ አዛውንት ጓደኛዬን በአውቶብስ ውስጥ ሲነኩት ብዙ ጥድፊያ ነበር	1
ምሽት ላይ እየተራመደ ሳለ አንድ ሰው አለፈኝ እና ኮታ አስተያየት ሰጠ	1
አንዳንድ ሰዎች እየተከተሉ አስተያየቶችን ያስተላልፋሉ	1
መንገድ ላይ ስሄድ አንድ ሰው ተከትዬ አስተያየት ሰጠኝ	1
እስካሁን ምንም ነገር አልተፈጠረም ነገር ግን አክስቴ ኮሌጅ ስትሄድ በወንዶች ቡድን ተሳለቀች	1
ማፏጨት እና ማለፍ የቫልጉር አስተያየቶች	1
ሆሊ እየተጫወትን ሳለ አንድ ሰው የሰውነት ክፍልን ነካ	1
ወደ ትምህርት ቤት ስሄድ ወይም ወደ ቤት ስመለስ ወንዶች ይደውሉ እና አስተያየት ይሰጣሉ	1
አንድ መሪ በአውቶቡስ ውስጥ በጣም መጥፎ አስተያየቶችን ሰጠኝ	1
አንዴ ወደ ቤቴ ስመለስ በእኔ ላይ ኮከብ ሆኖበት አስተያየት መስጠቱን የቀጠለ አንድ ሰው ነበር ( )	1
በብስክሌት ላይ ያሉ የወንዶች ቡድን በልጃገረዶች ላይ አስተያየቶችን እያስተላለፉ ነበር ምሽት ላይ ተከስቷል	1
ጠዋት ሜትሮ ላይ ስሳፈር ርካሽ አስተያየቶች እና ፊሽካዎች ነበሩ	1
የትምህርት መምህር ደረትን ይነካ ነበር እና ስለ ወሲብ ይናገር እና የብልግና ቪዲዮ ያሳያል	1
ኦግሊንግየፊት ገጽታአስተያየት	1
አስተያየት መስጠትበክለብ ጂም አቅራቢያ መደበኛ መሰረት	1
አንዳንድ ሰዎች እኔን እና ጓደኞቼን በመንገዴ ላይ እያፏጩ ነበር	1
እነሱ በተመሳሳይ ሜትሮ ውስጥ ነበሩ እና ርካሽ አስተያየቶችን አልፈዋል ተከትለው እና ፎቶ ለማንሳት ሞክረዋል ከሰአት በኋላ በራጂቭ ቾክ ሜትሮ ጣቢያ ተከሰተ	1
ምሽት ላይ በተጨናነቀ የኒውሮድ ጎዳና ላይ በግል ክፍሎቼ በአካል ተነካሁ	1
ትናንት አመሻሽ ላይ ባለቤቴ ከቫስትራፑር ወደ ናንዳን ባው እየተጓዘች ነበር እና በመንገድ ላይ በሞተር ሳይክል ውስጥ ያለ አንድ ሰው ድመት እየደወለ እና ከቀኑ ሰአት ላይ አስተያየት ሲሰጥ ከ እስከ አፕልዉድ ያለው ጅረት በጣም የተገለለ ስለሆነ ብዙ ሴቶች ሲሄዱ ባለስልጣኑ በዚያ መንገድ ላይ ጥበቃ ለማድረግ እንዲሞክር ይጠይቁ ወደ ሥራ ይሂዱ እና እስከ ድረስ ዘግይተው ወደ ቤት ይምጡ	1
ከኮሌጅ ወደ ቤት ስመለስ አንድ ልጅ ሁል ጊዜ ያሳዝነኛል	1
እኔ ሴት ልጅ ነኝ እና ትምህርት ቤት እሄድ ነበርእሁድ ነበር እና አንዳንድ ወንዶች ልጆች በሚያልፉበት ጊዜ አስተያየት ሰጥተዋል ያ ለእኔ በጣም ተስፋ አስቆራጭ ነበር እና ትምህርት ቤት ከመሄድ ይልቅ ወደ ቤት ሄድኩ	1
ከትምህርት ቤት ወደ ቤት ስመለስ ሁለት ሰዎችን አገባሁ እና ከእኔ ጋር የግብረ ሥጋ ግንኙነት ለመፈጸም እንደሚሰማቸው ነገሩኝ	1
ከሰሜን ምስራቅ ለመጣ ጓደኛ የሚስጥር እና ጨዋነት የጎደለው መልእክት	1
ሎልበየቀኑ እዚህ ይከሰታል! አሁን በትክክል ተለምደናል	1
እንደ ማስወጣት የበለጠ ወደ ቤት ስመለስ ሁለት ሰዎች ሊከተሉኝ ሞክረው ጨዋነት የጎደለው ድርጊት ፈጸሙ	1
ከክፍል ስመጣ የወንዶች ቡድን ሴት ልጅን ሲያሾፉ አየሁ	1
ወንዶቹ በእግር በሚጓዙበት ጊዜ በሴቶች ላይ መጥፎ አስተያየቶችን ተናግረዋል ልጃገረዶቹ በራሷ እየተራመዱ ነበር እና ወንዶቹ በብስክሌታቸው ይጓዙ ነበር	1
ከላይ ወደ ታች በመመልከት እና አስተያየት መስጠት ማሾፍ በቡድን ውስጥ ማወዛወዝ	1
አንዲት ልጅ ወንድ ልጅ አስተያየት ስትሰጥ አየሁ እሱ አስተያየት ብቻ ሳይሆን ተሳለቀባት እና በስሟም ጠራት	1
በባፋል ከቢሮ ወደ ቤት ሲመለሱ ሁል ጊዜ መጥፎ አስተያየቶችን የሚያስተላልፉ የወንዶች ቡድን ነበሩ	1
ባቡሩን እየጠበቅኩ መድረክ ላይ ቆሜ ነበር አንድ ሰው ሲያየኝ አስተዋልኩ በሚቀጥለው ቀን እንደገና እያየኝ ነበር ይህ ለአንድ ሳምንት ያህል ቀጠለ ከዚያም ወደ እኔ መጥቶ ስሜንየኮሌጅ ስምንአድራሻዬን ጠየቀኝግን አሁንም እየጠየቀኝ ተከተለኝ ተናድጄ እንደገና ካስቸገረኝ ወይም ከተከተለኝ በእሱ ላይ ቅሬታ አቀርባለሁ እና ከዚያ በኋላ እሱ ፈጽሞ አልተከተለኝም ብዬ አስጠነቀቀሁት	1
ወደ ቤት እየተመለስኩ ሳለሁ የማጠናከሪያ ትምህርቴ ከተጠናቀቀ በኋላ ነበር የሴቶች ቡድን እያሾፉኝ እና የወሲብ ግብዣ ምልክት እየሰጡኝ ነበር	1
በአውቶቡሱ ውስጥ አንድ ሰው በሴት ልጅ ላይ እራሱን መቦረሽ ቀጠለ	1
በኮሌጅ ውስጥ ፉጨት የሚነፉ እና አስተያየት የሚሰጡ የወንዶች ቡድን	1
የተወሰኑ የወንዶች ቡድን ጸያፍ አስተያየቶችን እየሰጡ እና ጸያፍ አገላለጾችን ይሰጡ ነበር ከሰአት በኋላ ተከስቷል	1
ሁለት ሰዎች የጓደኛዬን ፎቶግራፎች በሕዝብ መኪና ውስጥ ጠቅ እያደረጉ ነበርበኋላ ድምጿን አነሳች እና እነዚያ ሰዎች በሚቀጥለው ጣቢያ ተወግደዋል	1
በአውቶቡስ ፌርማታ ላይ ቆሜ ሳለሁ አንድ እንግዳ መጥቶ ስለ አለባበስ ስሜቴ አስተያየት ሰጠ ከዚያ በኋላ ቆመ እና በመጥፎ መንገድ እኔን ማየት ጀመረ ትንሽ ሄጄ ራሴን ለመደበቅ ሞከርኩ	1
ማታ ላይእዚያ ነበር የአንዳንድ ስራ ነገር ግን እዚያ በአውቶቡስ ፌርማታ አቅራቢያ ያሉ አንዳንድ ሰዎች ተገቢውን ባህሪ አሳይተዋል ችላ አልኩ እና አውቶቡስ ወሰድኩ	1
በኦምፒክ መንገድ እየተራመድኩ ነበር አንዳንድ ወንዶች ስለ አንዲት ሴት የስድብ ቋንቋ ስለምትጠቀም መጥፎ አስተያየት ሲሰጡኝ ሴትየዋ በጣም ዝቅተኛ ስሜት ተሰምቷታል	1
ወደ አፍታዎች የገበያ አዳራሽ ሲሄድ አንድ ልጅ ስለ እኛ አስተያየት መስጠት ጀመረ	1
መጥፎ ባህሪ	1
ከምሽቱ አካባቢ ነበር አንዳንድ ወንዶች መኪናቸውን አቁመው ርካሽ ቃላትን እና የድመት ጥሪዎችን ተጠቅመው ጓደኛዬን በመንገዷ ላይ ለማስቆም የሞከሩት	1
እኔ የነርሲንግ ተማሪ ነኝ አንድ ወንድ መጥቶ ብቻህን ነው የምትሄደው እያለ ያሾፍኛል? እንዴት ነህ?	1
በክፍሌ ውስጥ ያሉ አንዳንድ ወንዶች ሁልጊዜ ጸያፍ ቃላትን በመናገር ሴት ልጅን ያሾፉ ነበር	1
ከኮሌጅዬ ወደ አፓርታማዬ በእግር ስሄድ በመኪና ውስጥ ያሉ የወንዶች ቡድን በድንገት ቆም ብለው አስተያየት መስጠት ጀመሩ	1
በመንገድ ላይ ስንጓዝ ሁልጊዜ ቀጣይነት ያለው አስተያየት መስጠት አለብን	1
በቡድን ሆነው በተሰበሰቡ ሰዎች እና አስተያየቶች ገፍተው ወጡ ምሽት ላይ ሆነ	1
አስተያየት ተሰጥቶኝ ነበር እና ብዙ ሰንሰለት የመንጠቅ ክስተቶች ተከስተዋል	1
አውቶቡስ እየጠበቅኩ ነበር አንዳንድ ሰዎች አስተያየት ሲሰጡኝ ነበር	1
ጥቂት ሰዎች በፓርክ ውስጥ በምትያልፍ ሴት ላይ አስተያየት ሲሰጡ ነበር	1
ከሆስቴሉ ውጭ በወጣሁ ቁጥር በሁሉም ቦታ እና በእያንዳንዱ ጊዜ እንደዚህ አይነት ትንኮሳ ይደርስብኛል ከኮሌጅ እና ሆስቴል ውጭ በሁሉም ቦታ ይከሰታል	1
ማሳደድ	1
ከጓደኛዬ አንዷ በህዝብ አውቶቡስ ውስጥ ተዘግታ ነበርትንኮሳ ደረሰባትእሷ ግን አምልጣለች	1
ወንዶች ያፏጫሉ እና ይመለከቱ ነበር ምሽት ላይ ሆነ	1
በትናንሽ ጎዳና ላይ ብቻዋን የምትሄድ ሴት ልጅን የወንዶች ቡድን ትንኮሳ አልነበረም	1
ትክክለኛ ቦታን ወይም ክስተትን ይገልፃልእነዚህ ጉዳዮች በየቀኑ በካፒታል ውስጥ ይከሰታሉ	1
በአውቶቡስ ፌርማታ ላይ ቆሜ ነበር እና አንድ ሰው መጥቶ አስከሬኑን ከእኔ ጋር በጀርባዬ ላይ አያይዞ ነበር	1
እኔ ልጅ ነኝ በሰዎች ተሳለቁበት ከዛ ምላሽ ሰጠሁ እና ከእኔ ጋር መዋጋት ጀመሩ	1
ከጓደኞቼ አንዱ በአንዳንድ ወንዶች ልጆች የቃላት ስድብ ደርሶበታል	1
ለመዞር ስኩቲ እጋልባለሁ ቀደም ብዬ ይሰማኛል ምናልባት ስኩቲ ብጋልብ ሔዋን ያን ያህል እንዳሾፍኩትበግልጽ ተሳስቻለሁ በቅርቡ በጋኔሻ ቪዛጃን ወቅት ሰዎች ወደ እኔ ሲመለከቱየትራፊክ ሰበብ ወስደው ከእኔ ጋር ወደነበረው ወደ እኔ እና ወደ ጓደኛዬ ለመቅረብ ሲሞክሩ አስተዋልኩ ይህ ብቻ ሳይሆን በተለመደው ቀንም ቢሆን የሪክሾ ሾፌሮች ቀሚስ ለብሼ ስነሳ ወይም የህንድ ልብስ ለብሼ ቢሆንም አሁንም እያዩኝ ሲያዩኝ አገኛለሁ አንድ ጊዜ በብቸኝነት መንገድ ላይ አንድ መኪና ከኋላዬ እየነዳ ነበር እና መንገዱ ባዶ ቢሆንም ጩኸቱን ቀጠለ	1
ሻጩ እያወዛወዘኝ ነበር እና በዲኤልኤፍ ኢምፖሪዮኢቨኒንግ ፡ ፒኤም ሊስብኝ ሞከረ	1
ለትምህርት ከፓንችፓካዲ አካባቢ ወደ ታኔ ጣቢያ እየተጓዝኩ ነበር በብስክሌት እየጋልብኩ ነበር እና አንድ ሰው በብስክሌት ይከተለኝ ነበር ያለማቋረጥ ሊያናግረኝ እየሞከረ ነበር ስሜን ማወቅ ፈልጎ ነበር እናም በዚህ መንገድ በየቀኑ በተመሳሳይ ጊዜ እንደምጋልብ ማወቅ ፈለገ ዝም ብዬ ችላ አልኩት ወደ ትምህርቴ ለመቸኮል ስለምፈልግ ምንም ማድረግ የማልችለው ነገር አልነበረም	1
ከሰአት በኋላ ከትንሿ ወንድሜ ጋር በመንገድ ላይ ስሄድ አንድ ሰው ስለ አለባበሴ አስተያየት ሰጠ እና ደህንነት አይሰማኝም	1
እኔና እህቴ ከስራ በኋላ ወደ ቤት እንሄድ ነበር የከባድ መኪና አሽከርካሪዎች እንደዚህ አይነት ቆሻሻ አስተያየቶችን አልፈዋልጥቂቶቹ ሰክረው ነበር ንዴት ወስደን ረጅሙን መንገድ ወደ ቤት ወሰድን	1
ምሽት ላይ ሰአት አካባቢ ከጓደኛዬ ጋር ለምሳ ወጣሁ () የወንዶች ቡድን አስተያየት ሰጥቷል ምሳ ካርል ኮታ (ከእኛ ጋር ምሳ በልተናል)	1
በጣም መጥፎ ተሞክሮ ነበር	1
ምሽቱ ነበር ፡ ከጓደኛዬ ጋር ወደ ሱቅ እየሄድኩ ነበርበመኪና ውስጥ የተቀመጡ አንዳንድ ሰዎች በጣም በመጥፎ ሁኔታ ስለእኛ አስተያየት ሰጥተዋል	1
ይህ ክስተት የተከሰተው በጠዋት ነው በሜትሮ (ቢጫ መስመር) ውስጥ ቆሜ ነበር እና አንዳንድ ወንዶች አስተያየት ሲሰጡ እና እያዩ ነበር	1
የሰሜን ምስራቅ ልጃገረድ	1
አንዳንድ ወንዶች ጨዋ ያልሆኑ አስተያየቶችን ሰጥተዋል እና በባል ባሃርቲ የህዝብ ትምህርት ቤት አቅራቢያ ሴት ልጅን ለመንጠቅ ሞክረዋል	1
ሰዎች እርስዎን ይመለከታሉ እና በምሽት አስተያየቶችን ያስተላልፋሉ	1
ሰዎች መጥፎ ቃላትን ይጠቀማሉ እና በሴቶች ላይ መጥፎ አስተያየቶችን ያስተላልፋሉ	1
ሴት ልጅን በማከም የታመሙ ወንዶች	1
ወደ ቲማርኬት ስሄድተመሳሳይ ዕድሜ ያላት ሴት እናቴ የወንድ ጓደኛዋ እንድሆን ስትጠይቀኝ አገኘኋት	1
ምሽት ላይ የተነሱ አስተያየቶች እና ምስሎች	1
ገበያውን ስጎበኝ አስተያየት ተሰጥቶኝ ነበር	1
ድመት አስተያየት እና መጥፎ የፊት መግለጫዎች	1
የወንዶች ቡድን በብስክሌት መጥተው እከክዬን አውጥተው ተሳለቁብኝ በጣም ፈራሁ	1
በመኪና ውስጥ ያሉ ሰዎች አስተያየት ሲሰጡ	1
ስለ ጾታዊነቴ በጣም ተቸግሬ ነበር	1
ሰዎቹ ጠዋት ላይ ስለ አስተያየት ይሰጡ ነበር	1
በገበያ ላይ ያለች የ ዓመቷ ልጃገረድ ላይ ብዙ ወንዶች ርካሽ አስተያየት ሰጥተዋል	1
ትምህርት ቤት የምንሄደው በከንቱ ነው ይልቁንም ወላጆቻችንን ገንዘብ እናባክናለን ይላሉ	1
በዴሊ ውስጥ በሁሉም ቦታ ማለት ይቻላል ይከሰታል	1
ድመት ተጠርቻለሁተጨፍጭፌበጆሮዎ ውስጥ ጸያፍ ነገሮችን በሹክሹክታ ይንሾካሾካሉ እና ብዙ ጊዜ ተከስቷልብዙ ጊዜ በጠራራ ፀሀይ ይከሰታል ትምህርት ቤት እያለሁ በጣቢያ አቅራቢያ ተንከባለልኩበዚያን ጊዜ በጣም ትንሽ ነበርኩ ከመቼውም ጊዜ ይበልጥ አሰቃቂው ቦታ ነው እና ከካንዲቫሊ ምስራቃዊ ጣቢያ እስከ ሎክሃንድዋላ እና ሌሎች አካባቢዎች ያለው መጋራት ሪክሾ ምንም አይነት ደህንነቱ የተጠበቀ አይደለም ብዬ አስባለሁ ከጊዜ ወደ ጊዜ በተለያዩ ወንዶች በሪክሾ ውስጥ ተበድያለሁ	1
በቤቴ አቅራቢያ ያለ አንድ ልጅ አሁን እያሳደደኝ ነው መንገዱን ባለፍኩ ቁጥር ቆሻሻ ዘፈኖችን መዘመር ይጀምራል እና እንደ አጃ ሜሬ ፓስነገሮችን አደርጋለሁ ያሉ ነገሮችን ይናገራል	1
በሰሜን ካምፓስወደ ቪሽዋቪዳላያ ሜትሮ ጣቢያ የሚወስደው መንገድ ተከሰተበአንድ ጊዜ ጠዋት ላይ ጨዋነት የጎደለው ስም መጥራት እና በሌላ ጊዜ ደግሞ ምሽት ላይ ጨዋነት የጎደለው ንክኪ ገጠመኝ	1
አንዳንድ ወንዶች አንዳንድ ሴቶች እንዴት እንደሚለብሱ ሁልጊዜ ለመበዳት ዝግጁ ናቸው ይሉ ነበር አንዲት ሰርቲ ሴት በጣም አጭር ድሬ ውስጥ ስለነበረች ማጠፍ እንደማትችል ተናግረዋል	1
አመሻሹ ላይ ወተት ልገዛ ስሄድ አንድ ትልቅ ሰው ከእህቱ ጋር ተከተለኝ እና ያ ሰውዬ ጀርባዬን ነካው እና ሌሎች የሚያበሳጩ ነገሮች እና አንተ ማን ነህ አልኩ? እሱ የራሴ ሰው ነው ብሎ መለሰ እና ግድ ይለኛል ተጨንቄ በፍጥነት ወደ ቤት ሮጥኩ	1
አስተያየት መስጠትመጥራትማፏጨት	1
አንዳንድ ወንዶች ልጆችን ያሾፉ ነበር እና አንድ ቀን እዚያ እንድቆይ ጠሩኝ	1
በጣም መጥፎ ነበር	1
አንዳንድ ጊዜ ሰዎች በድንገት ይነኩኛል እና አስተያየቶችን ያስተላልፋሉ	1
እኔና ጓደኛዬ ከትምህርት ቤት እየተመለስን ነበር ከዚያም ሦስት ወንዶች ልጆች እኛን መከተል ጀመሩ አስተያየቶችን አስተላልፈዋል እንዲሁም የእኛን ፎቶ ለማንሳት ሞክረዋል	1
ከጓደኞቼ ጋር በታክሲ ወደ ኮሌጅ እየሄደች ነበር መድረሻው ላይ ከደረሰ በኋላ አሽከርካሪው በተሳሳተ መንገድ ነክቶ ማሽኮርመም ጀመረ እና የሞባይል ቁጥር ጠየቀ	1
አስተያየት	1
በማይክሮ አውቶብስ ወደ ቤቴ እየሄድኩ ሳለሁ ማንነታቸው ያልታወቁ አንዳንድ ወንዶች ልጆች ወደ እኔ የሚጠቁሙ የሞላ ቃላትን ተጠቅመዋል ይህም በጣም ያሳዘነ ነበር	1
ወንዶች ልጆች ሲያሳድዱሴት ልጆች ሲያፏጩ አይቻለሁ	1
በሕዝብ ተሽከርካሪ ውስጥ መግፋት እና ዋዜማ ማሾፍ	1
በበዓላት ወቅት ድግስ ላይ ነበርን እናም ሰዎች በህዝቡ ላይ ተገቢ ያልሆነ ጥቅም ማግኘት ጀመሩ እና እኛን መንካት ጀመሩ	1
በሻይ ድንኳን ውስጥ ሻይ እየጠጣሁ ነበርእዚያ ያሉ ወንዶች እኔን እያወዛወዙ እና በመካከላቸው ስለ እኔ አስተያየት ሲሰጡ	1
በአንዳንዶች ላይ አስተያየት መስጠት በየቀኑ በኮሌጃችን ውስጥ ይከሰታል	1
ከቢሮዬ ወደ ቤት እየተመለስኩ ሳለ አንዲት ሴት አጭር ቀሚስ ለብሳ እና በዚያ ጎዳና ላይ ያሉ ጥቂት ወንዶች በእሷ ላይ መወከል ሲጀምሩ እና ስለ ሰውነቷ ክፍሎች አስተያየት ሲሰጡ አየሁ	1
ወደ ቤት ስንሄድ አንድ ልጅ በጓደኛዬ ላይ ያፏጫል ነበርጓደኛዬ ሰደበው እና ለአለቆቹ ቢሮ እንደምታሳውቀው ነገረው	1
ወደ አጎቶቼ ቤት ስሄድ አንዳንድ ሰዎች ተከተሉኝና ያሾፉብኝ ነበር ቀኑን ሙሉ አዝኛለሁ	1
ወደ ቤቴ በሚወስደው መንገድ ላይ የወንዶች ቡድን ሁል ጊዜ ያሾፉብኝ ነበር	1
ትምህርቴ ስላለ ሁል ጊዜ እዚያ ፊት ለፊት እጋፈጣለሁ ሌላ መውጫ መንገድ የለም	1
ምሽት ላይ ሃፕፔንድ በቫሻሊ ወሰን ሜትሮ	1
ሰንሰለት መንጠቅአስተያየት መስጠትመንካትመጎተትአስገድዶ መድፈርወሲባዊ ጥቃት	1
የቡድን ልጆች አስቸገሩን	1
ከልጃገረዶቹ መቀመጫ አጠገብ የቆሙ ወንዶች ጨዋነት የጎደለው አገላለጾችን ይናገራሉ (የአውቶቡስ መስመር ቁጥር )	1
ሰራተኛ ሴት ነች እና ችላ አለች	1
በዚህ አካባቢ የአልኮሆል ሱቅ አለ እና ከ በኋላ ምሽት ላይ በባንጋንጋ የሚኖሩ ወንዶች ልጆች መጥተው ሴት ልጆችን ያስጨንቁ ነበር	1
አንዳንድ ወንዶች ሴቶችን መጥራት ይወዳሉ ለማግባት በጣም ዝግጁ እንደሆኑ ይነግሯቸዋል	1
ይህ ክስተት የተከሰተው እኤአ ማርች ቀን ከቀኑ ሰዓት አካባቢ ነው በብስክሌት ላይ ያሉ ሁለት ሰዎች ሴት ልጅን እየተከተሉ ነበር እና በእሷ ላይ አስተያየቶችን እየሰጡ ነበር	1
ወደ ቤቴ ስመለስ አስተያየት እየተሰጠኝ እና ሳያስፈልግ እያሾፍኩ ነበር	1
አንዳንድ ወንዶች ልጆች እኔን ተከትለው ስለ እኔ አስተያየት መስጠት ጀመሩ	1
ይህ ክስተት የተከሰተው በዲቲ ከተማ መሃል ጉራጌኦን በጠዋት በ አካባቢ ነውከኪቲ ጓደኞቼ ጋር ነበርኩሁለት ሰዎች ተከተሉኝከዚያ ለመቅረብ ሞከርኩ በጥሬው አመለጠሁ	1
የወንዶች ቡድን በእኔ ላይ አስተያየት ይሰጡኝ ነበር	1
ጓደኛዬ ከባቡር ወደ ባንድራ ስትጓዝ በአደንዛዥ ዕፅ ሱሰኛ እና ጠጪ ትንኮሳ ደረሰባት እና እርዳታ ስትጠይቅ ማንም ለመርዳት ዝግጁ አልነበረም ሴት ልጆች ያሉት የሴቶች ክፍል እንደመሆኑ መጠን አላግባብ መጠቀም እና መንካት ጀመረ	1
ወንዶቹ ሰክረው በሴቶቹ ላይ መጥፎ አስተያየት ሰጡ ሴቶቹን ለመደፈርም ሞከሩ	1
በጎዳናዎች ላይ ባለፍኩ ቁጥርአንዳንድ ሰዎች በተለይም አስተያየቶችንጎግልንፉጨት እና ፎቶ በሚያነሱ ወጣቶች ምክንያት ይህ ግርግር አለኝ	1
እንደተለመደው በሜትሮ እየተጓዝኩ ነበር ከዚያ ቀን በቀር በሜትሮው ውስጥ ያለማቋረጥ በሹክሹክታ የሚያወሩ እና እኔን የሚመለከቱ የወንዶች ቡድን ነበሩ በጣቶች እና የፊት ገጽታዎች የብልግና ምልክቶችን ማድረግ	1
ምሽት ላይበዚያ አካባቢብዙ ሰካራሞች ወደ አካባቢ ነበሩለአላፊ አግዳሚዎች አስተያየቶችን ያስተላልፋሉ	1
በተለይ ከሰከረ በኋላ በባሌ በየጊዜው ይደበደብኩ ነበር	1
ናንግሎይ ባቡር ጣቢያ ሳለሁ ተከሰተ	1
የሜትሮ ጣቢያውን በሠረገላቸው የሚያቋርጡ ጥቂት ወንዶችበፉጨት እና አስተያየቶችን በማለፍ	1
በእግር የሚጓዙ ብስክሌተኞች አስተያየቶችን አልፈዋል	1
ተከትዬ በ እና ላይ አስተያየት ሰጥቻለሁ	1
በመኪና ውስጥ የነበሩ በርካታ ሰዎች መኪናዬን ተከትለው ቪዲዮና ፎቶ አንስተው መኪናውን አስቁመው ብለው ጠሩን	1
የወንዶች ቡድን የትምህርት ቤት ልጃገረዶችን ሲያሾፉ አየሁ ብቻቸውን ባይሆኑም አሁንም ፈርተው ነበር	1
ከቻታርፑር ወደ ቫሳንት ቪሃር ስጓዝ በዲቲሲ አውቶቡስ ውስጥ ተከስቷል ጥቂት ወንዶች ልጆች ከጥቂቶቹ ልጃገረዶች ጋር ያለማቋረጥ አስተያየት እየሰጡ እና መጥፎ ባህሪ እያሳዩ ነበር	1
ሰዎች ትልቅ ጡቶች እንዳሉኝ አስተያየት ሰጥተዋል እና እንዴት ምላሽ እንደምሰጥ አላውቅም ስለዚህ ን ችላ አልኩ	1
በተጨናነቀ ቦታ ላይ ያለ አንድ ሰው የእህቴን የሰውነት ክፍል ለመንካት ሞከረ	1
ምሽት ላይ ተካሄደወንዶች በብስክሌት እየጋለቡ አስተያየት ሰጡ እና ብቻዋን የምትራመድ ሴት ልጅ ሰንሰለት ለመንጠቅ ሞከሩእንዲሁም ፎቶዋን ጠቅ ለማድረግ ሞከረች	1
አንድ ቀን ከቡኤ እየተመለስኩ ነበር ከአውቶቡሱ ስወጣ አንዳንድ ሁለት ሰዎች ወደ እኔ ሄደው እንደሚያውቁኝ ተናግረው ስለ እኔ የተሳሳቱ ጥያቄዎችን ጠየቁኝ ለምሳሌ ታናሽ ወንድምህ እንዴት ነው የእናትህ ሁኔታ እንዴት ነው?እናቴ በጭራሽ አልታመመችም እና ታናሽ ወንድም የለኝምበኋላወደ ቤት እንድመለስ እና ያህል ከማንኛውም ምንጭ ገንዘብ እንዳገኝ ጠየቁኝ ለእናቴ መድሀኒት እንዲያዘጋጁ እና ለማንም እንዳይናገር	1
የወንዶች ቡድን በ አመት ውስጥ ስታልፍ ሴት ሁሉ አስተያየት ሰጥተዋል	1
ቁምጣ ለብሼ ነበር አንዳንድ የወንዶች ቡድን በለበስኩት መሰረት አስተያየት ሰጠኝ አሳፋሪ ነበር እና መጥፎ ስሜት ተሰማኝ	1
አንዲት ልጅ አጠገቤ ቆማ ሊፕስቲክ እየተጠቀመች ነበር እና ወንዶቹ አስተያየት እየሰጡ ርካሽ ዘፈኖችን ይዘምሩ ነበር	1
ከፓርቲ ስመለስ በለበስኩት ቀሚስ ላይ የሚያፏጭ እና የሚያዋርዱ አስተያየቶች ነበሩ	1
ጓደኛዬ አክስቷ ሁል ጊዜ እንደሚሳለቁባት እና ሰካራም እንደሚከተላት ነገረችኝ በመንገዱ በኩል ወደ ቤቷ እያለፈች	1
እኔና ጓደኛዬ ከትምህርት ቤት ወደ ቤት እየተመለስን ነበር ወንዶች የትምህርት ቤት ዩኒፎርማቸውን ለብሰው እኛን ተከትለው አስተያየት መስጠት ጀመሩ አንድ ወንድ ልጅ በጓደኛዬ ጡት ላይ ተሳለቀ እነዚህ ወንዶች ልጆች ሁልጊዜ ከሴት ልጆች ትምህርት ቤት ውጭ ይቆማሉ እና ችግር ይፈጥራሉ	1
ጓደኛዬ ወደ ሆስቴሏ እየሄደች ነበርየእስረኞች ቫን አልፎ በፉጨት አለፉ እና በአለባበሷ ላይ ጨዋነት የጎደለው አስተያየት ሰጡ!	1
በሴቶች ላይ የድመት ጥሪዎችኦግሊንግ እና ድንጋይ መወርወር የተለመደ ነው በተለይም በኮሌጅ አውቶቡሶች ውስጥ መምህራን ሴቶች እንኳን አይናቸውን ጨፍነዋል ከዚህ ኮሌጅ ይርቃሉ	1
በቫሱ ዴቭ ትምህርት ቤት አቅራቢያ አንድ ሰው አግባብ ባልሆነ መንገድ ነካኝ	1
ልጅቷ ሰውነቷን በመንካት የወሲብ ባህሪ እያሳየች ነበርልጃገረዷ በጣም አለቀሰች	1
ቆሜ ነበርአምፕ ልጅ ያለማቋረጥ ይመለከት ነበርአስተያየት ይሰጣል ከምሽቱ ፡ ላይ የሜትሮ ስቴቨኒንግ እስክደርስ ድረስ ይከተለኛል	1
አንድ ቀን ትምህርት ቤት እየሄድኩ ሳለ የወንዶች ቡድን ያሾፉብኝና ስለ እኔ አስተያየት ሰጡ	1
ከሰአት በኋላ ከትምህርት ቤቴ ውጭ ሆነ አንዴ መኪና ከፊት ለፊቴ ቆመ እና በመኪናው ውስጥ ያለው ሰው ማጋለጥ እና የግል ክፍሎቹን ማሳየት ጀመረ	1
ትምህርት ቤት ስሄድ የወንዶች ቡድን ነበሩ ያሾፉብኝ ጀመር እና መሳቅ ጀመሩ እሱን ለማስወገድ ከአካባቢው በፍጥነት ተጓዝኩ	1
በካራንጃ መድረክ ማታቱ ውስጥ ነበርኩ እና ቱቱ እና ጓደኞቹ አንዲት ሴት ልብስ ስትሸጥ እዚያ ሲደውሉ አየሁ እና ችላ ስትል በ ዓመቷ መሳለቂያ ጀመሩ	1
ይህ የዳሰሳ ጥናት በሙምባይ የመንገድ ገበያ ላይ ካለው የደህንነት ኦዲት ጋር በሴፍሲቲ (ቀይ ዶት ፋውንዴሽን) ይከናወናል	1
እሱ በመሠረቱ ያገለገሉ ነገሮችን የሚመለከት የርቀት ሰው ነበር ይህ ሰው እኩለ ቀን ላይ ያገለገሉ ነገሮችን ለመሰብሰብ ወደ ማህበረሰባችን ይመጣ ነበር ይህ ሰው በአገናኝ መንገዱ አጠገብ ስወጣ አንድ ቀን ነበር እና በድንገት እዚያ ወርዶ እራሱን ማውለቅ ጀመረ እና ብልቱን አሳየኝ እና እፈልግ እንደሆነ ምልክት ሰጠኝዳርካር ግቢቱልሺዋዲታርዴኦ	1
ወደ ኮሌጅ እየሄድኩ ነበር እና በአጠገባቸው በሚያልፉ ልጃገረዶች ላይ አስተያየት ሲሰጡ የሰዎች ቡድን አየሁ	1
በብስክሌት በሚጋልቡ ሁለት ወንዶች ልጆች የተሰጡ አስተያየቶች	1
ሴሰኛ አስተያየቶችን ሰጥቼ ነበር እና በአንዳንድ ሰዎች ተጎብኝቻለሁ	1
በመድረኩ ላይ ሜትሮውን እየጠበቅኩ ሳለየወንዶች ቡድን ( ወይም )ጥግ ላይ ተቀምጠው ብቻዋን ለነበረች ልጅ አስተያየት ሲሰጡ አየሁ ልጅቷ ፊት ለፊት ልትጋፈጣቸው እንኳን አልቻለችም እና ጭንቅላቷን ዝቅ አድርጋ ሄደች ምሽት ላይ ተከስቷል	1
ከጓደኛዬ አንዱ በመንገድ ላይ ስትራመድ አንዳንድ ሰዎች የተለያዩ ቃላትን በመጠቀም አስተያየት እንደሰጧት ነገረኝ	1
የሌላ ክፍል ተማሪዎች አንዳንድ ጨዋነት በጎደለው ቃላት አስተያየት ሰጡኝ	1
በካሊያን የባቡር ጣቢያ ጠዋት ላይ ድመት እና ፉጨት	1
በተጓዝኩበት አውቶብስ ውስጥ አንድ ሰው ነበር እና ከእኔ ጎን ባዶ መቀመጫ ስላለ ተቀምጦ ሆን ብሎ እየገፋኝ ነበር	1
ተነካሁ (እና ከሰአት በኋላ በጉዞ ላይ ሳለሁ አስተያየት ሰጥቻለሁ	1
በእኔ ላይ አስተያየት የመስጠት ልደታቸው መብት እንዳለው ያህል ብዙ ጊዜ በእኔ ላይ ይከሰታል	1
አውቶቡስ ውስጥ ከኋላዬ የተቀመጠ አንድ ሰው ወደ እኔ የተመሩ ዘፈኖችን መዘመር ጀመረ	1
መንቀጥቀጥዋዜማ ማሾፍመንካትመጎተት	1
አንድ ወጣት የ ዓመቷ ልጅ ምን ያህል ቆንጆ እንደሆነች በመንገር በምታልፈው ልጅ ላይ እየጮኸ እና እያፏጨ ነበር	1
ጠዋት ላይ አንድ ወንድ ስሜን እየጮኸ ይደውላል (ኮሌጅ ስሄድ ለፊልም ልወጣው ስላልቻልኩ ነው	1
መድረኩ ላይ የተቀመጡት ልጆች በእህቴ ላይ እያፏጩ ስለ ሰውነቷ መዋቅር አስተያየት እየሰጡ ነበር	1
ወደ ትምህርት ቤት ስሄድ ብዙ ጊዜ በአንድ ልጅ ማሾፍ አጋጥሞኛል	1
አንድ ጊዜ በምሽት አምፕ በሳሮጅኒ ናጋር የምድር ውስጥ ባቡር ውስጥ ስሻገር አንድ ሰካራም ሰው ተከተለኝ እና በእኔ ላይ አስተያየት ሲሰጥ	1
አመሻሹ ላይ በስልክ እያወራሁ እየተራመድኩ ሳለ በድንገት አንድ ሰው እጄን መታው እና ከጓደኞቹ ጋር ሄደ	1
ከኮሌጅ ሲመለሱ አንዳንድ ወንዶች ልጆች ፎቶ ማንሳት ጀመሩ እና በሜትሮ ጣቢያ አስተያየት መስጠት ጀመሩ	1
ከክፍል ሲመለስ አንድ ሰው ለተጎጂው አንዳንድ ጨዋ ያልሆኑ ቃላትን ተናግሯል	1
በጠባብ መንገድ ከኮሌጅ ወደ ቤት ሲመለሱ ወሲባዊ ጥቃት	1
እኔ የ አመት ልጅ ነኝ እና ከእህቴ ጋር ስዘምት ሌሎች የወንዶች ቡድን ሲያሾፉባት እና አስተያየት ሲሰጡ አገኛለሁ	1
ወደ ቤቴ በሚወስደው መንገድ ላይ ያሉ አንዳንድ ወንዶች የፊት ገጽታን በገመድ ያፏጫሉያፏጫሉ እና ያዩኛል	1
ይህ ክስተት አንድ ሰው ልጅቷን አብራው ወደ ቤቱ ለመሄድ ፈቃደኛ ባለመሆኗ ሲያስጨንቃት አይቻለሁ	1
በ ላይ አስተያየት ተሰጥቶኛል	1
ምሽት ላይ በባቡር ጣቢያ አቅራቢያ አንድ የወንዶች ቡድን አስተያየት ሲሰጡ እና ሊነኩኝ እየሞከሩ ነበር	1
ሰው ከእኔ ጋር መጥፎ ባህሪ አሳይቷል	1
በሌሊት በአካባቢው ሰንሰለት መንጠቅ እና አስተያየት መስጠት	1
አስጋራሊ ግቢ ከአከራዩ በር አጠገብ ካለው በር ጀርባ ምንም ትክክለኛ መብራት የአደንዛዥ ዕፅ ሱሰኞች እና ቁማር እየተካሄደ አይደለም	1
ሁለት ወንድ ልጆች የሴት ልጅን ፎቶ እያነሱ ነበር እና አስተያየት ሲሰጡ ልጅቷም ተሸማቀቀች	1
ይህ ሰው በጀብዱ ደሴት ላይ ግድግዳ ላይ ሲወጣ የጡት ጡትዎ መጠን ምን እንደሆነ እንድጠቅስ ጠየቀኝ?ቁጥር	1
በጄ ብሎክ ገበያ ውስጥ ተከስቷል	1
በመኪና ውስጥ ወደ ዘመዴ ቦታ ስሄድ አንዳንድ ሰዎች ማስፈራራት ጀመሩ	1
ከጓደኞቼ ጋር በምሽት ከጠጣሁ በኋላ የወሲብ ጥቃት ደረሰብኝ ልብሴን በኃይል ለማውረድ ሞከረ	1
የወንዶች ቡድን በሜትሮ ውስጥ በአንዲት ልጅ ላይ አስተያየቶችን ያስተላልፉ ነበር	1
በአውቶቡሶች ውስጥ ያሉ ጥሪዎችአስተያየቶችመነካካት እና ሌሎችም	1
አንዲት ልጅ በአጠገቧ እያለፈች ነበር እና ጥቂት ወንዶች በእሷ ላይ ርካሽ አስተያየት ሰጡ እና በብልግና መንገድም እሱ በምሽት ሰዓታት ነበር	1
እኔ ቡድን ወንዶች ልጆች ክፉኛ እያዩኝ በአውቶብስ ውስጥ ያልተፈለገ ቃል እየተናገሩኝ አለፉ	1
ለጠዋት የእግር ጉዞ ወጥቼ ነበር በላዩ ላይ የተወሰነ ጽሑፍ የተጻፈበት አናት ለብሼ ነበር ከፊት የሚያልፍ ልጅ ያንን ጽሑፍ ጮክ ብሎ አንብቦ መሳቅ ጀመረይህ የሆነው ከ ወራት በፊት ነው	1
ይህ ክስተት የተከሰተው በየካቲት ወር ከሰአት በኋላ ነውበኢንተር ኮሌጅ ውድድር ወቅት አለባበሳችንን በተመለከተ የ አስተያየቶች ተላልፈዋል	1
በእግር ስሄድ ልጆቹ ዘፈን እየዘፈኑ ያሾፉበታል	1
ክስተቱ በሞዲናጋር፣ወደ ቤቴ እየሄድኩ ነበር በህይወቴ ውስጥ እጅግ የከፋ ሁኔታን አሳልፌያለሁ ሁለት ብስክሌተኞች መጥተው በመንገዳቸው ተስተጓጉለው መንገድ ላይ እያለፉ ነበር ከአእምሮዬ በላይ አንካሳ አስተያየቶችን ማለፍ ጀመርኩ በጣም ሩቅ አባቴ የብስክሌታቸውን የተሽከርካሪ ቁጥር ተመልክቶ በፖሊስ ጣቢያ ቅሬታ አቀረበ	1
አንድ ጊዜ መንገድ ላይ ስሄድ የወንዶች ቡድን ብዙ ነገር እየተናገሩ ነው ቆንጆ ሴሰኛ በጣም መጥፎ ስሜት ይሰማኛል እና ደህንነት አይሰማኝም	1
በብስክሌት ላይ የነበሩ ሁለት ሰዎች ቀርበው ሴሰኛ ዘፈኖችን መዘመር ሲጀምሩ አውቶቡስ እየጠበቅኩ ነበር ማንም አላስቆማቸውም እኔ ብቻ ነው የሚመጣውን አውቶቡስ ወሰድኩምንም እንኳን እኔ መሳፈር ያለብኝ ባይሆንም	1
ይህ የዳሰሳ ጥናት በሙምባይ የመንገድ ገበያዎች ላይ ካለው የደህንነት ኦዲት ጋር በደህንነት (ቀይ ነጥብ ፋውንዴሽን) ይከናወናል	1
ምሽት ላይ በአካባቢያዬ መናፈሻ ውስጥ በእግር እየተጓዝኩ ሳለአንዳንድ ቆሻሻ አስተያየቶችን አሳልፌያለሁ ()	1
ይህ ክስተት ከሰአት በኋላ በዲልሻድ የአትክልት ገበያ ውስጥ ተከስቷል በመንገድ ላይ አንዲት ልጅ ስትራመድ እና ሁለት ሰዎች በብስክሌት መጥተው ጀርባዋን በመምታት ክፉኛ ያንገላቱባታል	1
ከጓደኞቼ አንዱ ስለ ሰውነቷ መዋቅር አስተያየት መስጠት የሚወዱ የወንዶች ቡድን ትልልቅ ጡቶችቡቦች እና ከ ጀርባ እንዳላት በመናገር ታሪኮችን ስንናገር ቅሬታ አቀረበልኝ	1
በአውቶቡስ ስጓዝ አንድ ሰው ሊነካኝ ሞክሮ እጁን ትከሻዬ ላይ አደረገ	1
እኔ ሳልፍ ወንዶች ከጀርባዬ ቆሻሻ አስተያየቶችን እየሰጡ ነበር (እነሱን) ከመካከላቸው አንዱ በፉጨት እንኳን ከሰአት በኋላ ተከስቷል	1
ምሽት ላይ በሞልቻንድ ሜትሮ ጣቢያ መግቢያ አጠገብ ተከስቷል የአራት ሰዎች ቡድን ነበር (ሁሉም እያዩኝ ደደብ ዘፈኖችን እየዘፈኑ እና እያጠቁ ነበር	1
ይህ ክስተት የተከሰተው ምሽት ላይ በባትራ ሲኒማ ቤቶች አቅራቢያ ነው በአካባቢው እየሄድኩ ነበር እና አንዳንድ በብስክሌት ላይ ያሉ ወንዶች ልጆች ቀሚስ በለበሰች ልጅ ላይ የቆሻሻ አስተያየቶችን እየሰጡ ነበር	1
ከአሰልጣኝነት ሲመለሱ የተደረገ ብልግና እና አስተያየት	1
ወደ ገበያ እየሄድኩ ነበር ሁለት ሰዎች በብስክሌት መጥተው ክበቦችን ሲያቋርጡ እና አስተያየት ሲሰጡ አይተዋል	1
አስተያየት መስጠት እና መደወል እና መንካት እና መጎተት	1
በዚህ የህንድ ክልል በእንቅልፍ አውቶቡስ እየተጓዝኩ ነበርትኬቶችን የመፈተሽ ሃላፊነት ያለው ሰው የፖድ በሬን ከፍቶ ሲያስጨንቀኝ ነበር መታጠቢያ ቤቱን ለመጠቀም በእረፍት ፌርማታ ላይ ከአውቶብሱ ስወርድ በአቅራቢያው ወዳለው ሜዳ ሊጎትተኝ ሞከረ ደስ የሚለው ነገር አንድ ቤተሰብ አይቶ አዳነኝ	1
አስተያየት መስጠትልጃገረዶችን በመጥፎ ሁኔታ መንካት	1
በዲቲሲ አውቶቡሶች ውስጥ ተገቢ ያልሆነ አስተያየትጥሪዎች እና ያፏጫሉ	1
በዲቲሲ አውቶቡሶች አምፕ ኤአርኤስዲ አውቶቡስ ማቆሚያነካኝ እና ያፏጩኝ	1
ከትምህርት ቤቴ በመጡ ወንዶች አስተያየት ሰጥቷል መማር የማይፈልጉ ነገር ግን ሴት ልጆችን ብቻ የሚያስጨንቁ በጣም መጥፎ ሰዎች ናቸው	1
በአውቶቡስ ፌርማታ ላይ ያለች አንዲት ሴት ሁለት ሰዎች ስለ መልኳ አስተያየት ሲሰጡ ብዝበዛ ተሰማት	1
አንድ ቀን አውቶቡስ ውስጥ ስጓዝ ሴት ልጅን የሚያሾፉ የወንድ ቡድን ነበሩ እንዲሁም አንዷ ሊነካት ሞከረች በኋላም በእኔ ላይ አስተያየቶችን አስተላልፈዋል ከዚያም አውቶቡሱን አስቆምነው እንቀጥላለን	1
ከኮሌጅ ስንመለስ ሁለት ወንዶች ልጆች ፊቴ ፊት ለፊት ጨዋነት የጎደለው ድምፅ እያሰሙ ሄዱ	1
ሰዎች ትናንት ከእኔ ጋር መጥፎ ባህሪ ያሳዩኝ ነበርያኔ ለባለቤቴ አሳውቄአለሁ ሸሹ ለቱሪስቶች ምንም ደህንነት የለም አዲስ ክሪሽና ሆቴል አንድ ሰው ተገቢ ባልሆነ መንገድ ነክቶኝ በማሸጊያው ኩራት ተሰማኝ እንደነዚህ ያሉት ይከሰታሉ	1
አንድ ሰው አንዳንድ የሂንዲ ዘፈን እየዘፈነ ነበር እና በዛ ሊያሾፍብኝ ሲሞክር እኔን እንደሚጎዱኝ ነበሩ እና ከሜትሮ ስወጣ ነካኝ	1
ናይ በሜትሮ ጣቢያ አቅራቢያ በሚያልፉ ልጃገረዶች ላይ አስተያየት ሲሰጡ	1
በቀን እና በሌሊት በሁሉም ሰአታት ውስጥ በ አውቶቡስ በ ላይ ጥሪዎችአስተያየቶችመነካካት እና ማወዛወዝ	1
በማለዳ ሰዓትኮሌጅ ስሄድ አብዛኛውን ጊዜ እጋፈጣለሁ	1
ይህ ክስተት የተከሰተው ከምሽቱ ወራት በፊት ከቀኑ ሰዓት አካባቢ ነው ሁለት ሰዎች ርካሽ አስተያየቶችን ያስተላልፋሉ	1
አንድ ቀን አውቶቡስ ውስጥ እየተጓዝኩ ነበር አንዲት ልጅ አጠገቤ ተቀምጣ ወንድ ልጆቿ ቆመው ርካሽ አስተያየቶችን ሲያስተላልፉ አየሁ ልጅቷ በየቀኑ መጓዝ ስላለባት ብቻ እያወቀች ችላ ብላለች	1
በአላፊ አግዳሚዎች ላይ የሚያፏጩ የሰዎች ቡድን ስሞችን በመጥራት እና በማበሳጨት ማበሳጨት	1
ሲያልፉ እምቢ ካሉ ይደውሉልዎታል አልፎ ተርፎም ወደ ቤትዎ ይከተሉዎታል	1
በሕዝብ አውቶቡስ ውስጥ አንድ ወንድ ጓደኞቼን የሴት ክፍሎችን ለመንጠቅ እየሞከረ ነበር ለማቆም ቢያመለክትም አላቆመም	1
ማታ ላይ ከጓደኛዬ ጋር ወደ ኬሚስት ሱቅ እየሄድኩ ነበር እና ቁምጣ ለብሼ ነበር እና በድንገት ሁለት ሰዎች ይከተሉን ጀመር እና አስተያየቶችን ማስተላለፍ ጀመሩ	1
ሔዋን እያሾፈች እና እያየች እና አስተያየት ስትሰጥ	1
ሽማግሌው እያፏጨ እና ስለ ኮሌጅ ልጃገረድ አስተያየት ሲሰጥ በጠዋት ሆነ	1
የዛሬ አመት ገደማ ነበርማይክሮ አውቶብስ እየጠበቅኩ ነበርኮከብ የተደረገበት ሰውአንዳንድ አስጸያፊ ቃላትን ተናግሮ አልፎ ተርፎም ተከተለኝ	1
በስኩተር ላይ ያለ አንድ ሰው ከፊት ለፊቴ ቆመኮትኒስ ቡብስኩት አለ እና በመኪና ሄደ በጣም ደነገጥኩ እና ብዙ ቆይቼ ምላሽ አልሰጠሁም	1
ከደህንነት ኦዲት ጋር የተደረገ ጥናት ነው	1
በቤቴ አቅራቢያ በሚገኝ የጣፋጮች ሱቅ ውስጥ ነበርኩ	1
ይህ ክስተት የተከሰተው ምሽት ላይ ነው ወደ የሚጠጉ አዛውንት እህቴን ከዱላ ኩዋን መከተል ጀመሩ እና ብዙ ፎቶዎቿን ጠቅ አድርገዋል	1
ዛሬ ጠዋት ወደ ጉራጌን ስሄድ ሁለት ወንዶች ልጆች ተከትለው ነበር በተባለው እነዚህ ርካሽ የለውዝ መያዣዎች ስዕሎቼን ጠቅ በማድረግ እና በሚያሽከረክሩበት ጊዜ ቪዲዮዬን በመስራት ላይ ናቸው ስለሴቶች ደህንነት ተናገሩ የሴቶች ትንኮሳ እንደ ሀገር ስንት ደረጃዎች እየወደቅን ነው ከሁሉም በላይ እንደ ሰው	1
ሁለት ወንዶች ልጆች በብስክሌት ላይ ነበሩ እና ከሶስት ጓደኞቼ ጋር በነበርኩበት ጊዜ አስጸያፊ ቃላትን አስተያየት ሰጥተዋል	1
በአጋካን የእግር ጉዞ እየተራመድኩ ነበር እና ከጓደኞቼ እና በተለምዶ እዚያ ከሚለምነው ሰው ጋር እጅ ለእጅ ተያይዘው ነበር ኡቹሚ ገንዘብ ከመጠየቁ በፊት ግን አልሰጡትም እና እሷ እና ፍቅረኛዋ በኤችአይቪኤድስ እንደሚሞቱ ነገራቸው	1
አንድ ሰው ሙሉ በሙሉ በተጨናነቀ አውቶቡስ ውስጥ ሊነካኝ ሞከረ	1
እኔም አስተያየቶችን እያስተላለፈ ያለ ብስክሌተኛ ተከተለኝ	1
ከመኪና ማቆሚያው ስኩቲ በመውሰድ ሰዎች እየመጡ እየተከተሉ ነበር	1
በዲዳ መናፈሻ ውስጥ አንድ ቦታ እየሄድኩ ነበር ምክንያቱም አጭር መንገድ ነበር በፓርኩ ውስጥ ካርድ የሚጫወቱ ወንዶች ያፏጫሉ እና አስተያየት ይሰጡኝ ጀመር አለቀኝ ይህ የሆነው ከሰአት በኋላ	1
እህቴ ወደ ትምህርት ቤቷ ስትሄድ አንዳንድ ወንዶች ደውለው ሊነኩዋት ሞከሩ	1
ከሁለት ቀናት በፊት በቫይረር ጣቢያ የቃላት ጥቃት አጋጥሞኛል	1
ስኮቲ በሚጋልቡበት ጊዜ አስተያየት	1
ጠዋት ላይ ወደ ዮጋ ክፍል ሲሄዱ በብስክሌት ላይ ያሉ አንዳንድ ወንዶች እየጋበዙኝ ያሉ ያህል በጣም መጥፎ አስተያየቶችን ሰጥተዋል	1
አንድ ሰው ተከተለኝ	1
የ አመት የትንኮሳ አይነት በ በሌህ ዋና ባዛር (በቀን ሰአት) በሌህ ዋና ባዛር በ (በቀን ሰአት) በሌህ ትምህርት ቤት አስተያየት መስጠት (በቀን ሰአት)	1
ምሽት ላይ አስተያየቶችን ተላልፌያለሁ	1
በዲቲሲ አውቶቡስ መስመር ምሽት ላይ መንካት እና አስተያየት መስጠት	1
እህቴ ከደጃችን ውጭ ተቀምጣ ሁለት ወንዶች ልጆች አልፈው ቆንጆ እንደሆንን እና አልጋ ላይ ቢኖሩን ይወዳሉ ማለት ጀመሩ	1
የሰከሩ ሪክሾ መጎተቻዎች አስተያየት ሲሰጡ እና ሲያጉረመርሙ	1
በጣም አስፈሪ ነበር	1
ዕድሜ ዓመት በሌህ (በቀን ሰዓት) ትምህርት ቤት የትንኮሳ አይነት	1
እኔጓደኛዬ እና እህቷ በልደቷ ላይ ከተገኙ በኋላ እየተራመዱ ነበር ቀሚሶችን ለብሰን ነበር እና የካዋዶች ቡድን እያለፉእየጮሁ እና አስተያየቶችን እየሰጡ ነበር	1
ጠዋት ላይ ተከስቷል	1
ባቡሬን እየጠበቅኩ ሳለ አንድ ሰው ስለ ምስሌ አስተያየት እየሰጠ ነበር እና ጸያፍ ፊቶችን እና ምልክቶችን ሠራ	1
ከሜትሮ ጣቢያ ወደ ቤት እየተመለስኩ ሳለ አንዳንድ ሰዎች በእኔ ላይ አስተያየት መስጠት ጀመሩ	1
አስተያየት ሲሰጥቼይን እየነጠቀ እና ምሽት ላይ በአካባቢው ይደውላል	1
ወደ ጣቢያው ስሄድ ከጎኑ ያለው መንገድ የወንዶች ቡድን አስተያየቶችን ያስተላልፋሉ	1
በ አመት አካባቢ ዋዜማ ላይ ሁለት ወንዶች ልጆች በመንገድ ላይ የምትሄድ ሴት ልጅ ሲያሾፉ አይተዋል ምናልባት ወደ ሜትሮ ጣቢያ	1
ከትምህርት ቤቴ የመጡ ሰዎች ከትምህርት ሰዓቴ በኋላ ዱፓታዬን ለመሳብ ሞከሩ	1
አንዲት ልጅ በአምስት ክፍል ትምህርቷን ለቃ የወጣችው በፆታዊ ጥቃት ስለተፈፀመባት እና ወንዶች ልጆች ይሳለቁባት ስለነበር ትምህርቷን ለመልቀቅ የወሰነችው	1
ብዙውን ጊዜ በ አውቶቡሶች ውስጥ ወደ ደቡብ	1
አንድ ሰው አውቶቡስ ውስጥ ሊነካኝ ሞከረ	1
አንድ ሰው በጓደኛዬ ላይ አስተያየቶችን አስተላልፎ የንጥል ዘፈን መዘመር ጀመረ እሷ ስታልፍ እሱ ተሰማው	1
በተጨናነቁ አውቶቡሶች ውስጥ መቆንጠጥ እና አስተያየት መስጠት ብዙ ጊዜ ነው	1
ኮሌጅ እየሄድኩ ነበር እና አንድ ሰው በሜትሮ ጣቢያው አቅራቢያ አስተያየት መስጠት ጀመረ	1
በድርብ ትርጉም ማውራት እና ስለ ልጃገረዶች አስተያየት መስጠት	1
ቤቴን በአውቶቡስ ስመለስ አንድ ሰው ስሜን ጠየቀው ከዚያ በኋላ አስተያየት ሰጥቷል ቆንጆ ሞቲ (ወፍራም ሴት)	1
ወንዶቹ እነሱን ለመንካት በሚያልፏቸው ልጃገረዶች ላይ አስተያየት ሰጥተዋል እና ልጅቷ ምላሽ ስትሰጥ ለሎጂኮት ኮቲስ ባሃን ቹ አስተያየት ሰጥተዋልይህ በጣም አዋራጅ እና ርካሽ ባህሪ ነበር	1
አራት ወንዶች ልጆች መጥፎ አስተያየት ሲሰጡ እና ሴት ልጅን ለ ደቂቃ ይከተላሉ	1
ተገቢ ያልሆነ ንክኪ	1
ምሽት ላይ ቦታ ወሰደ አንዳንድ ወንዶች ልጆች በአንዳንድ ትምህርት ቤቶች ፊት ለፊት ቆመው ነበር መጥፎ ባህሪ እና አስተያየት ይሰጡ ነበር	1
የበጋ ከሰአት ነበርበመንገድ ላይ እየተራመድኩ ነበር በሞተር ሳይክል ላይ ያሉ ወንዶች ልጆች ከተቃራኒ አቅጣጫ ወደ እኔ ይመጡ ነበር ከመካከላቸው አንዱ የታችኛውን የሰውነቴን ክፍል ነካው	1
የወንዶች ቡድን እንደ ጓደኛዬ ዘፈኖችን መዘመር እና ማፏጨት ጀመሩ እና ከትምህርቶች ወደ ቤት እየተመለስኩ ነበር	1
አንድ ሰው ለክፍሌ እየሄድኩ እያለ እኔ እና ጓደኞቼ ለእነሱ ትኩረት የሚከፋፍል በመሆኑ መንቀሳቀስ እንደሌለብን አስተያየት ሰጥቷል	1
በትምህርት ቤቴ ውስጥ ያሉ አዛውንቶቼ ያስጨንቁኛል ይስቃሉ	1
ምሽት ኮሌጅ ከገባሁበት ጊዜ ጀምሮ በምሽት ሰአታት ከኮሌጅ ስመለስ ብዙ ጊዜ ማሳደድ ገጥሟቸው ነበር አሳዳጊዎቹ ወደ እኔ ቀርበው ሊያናግሩኝ ሞከሩ	1
የኮሌጅ ጉዞ ባቡር ግልቢያ ወንዶች አስቀያሚ በሆነ መንገድ የሚመለከቱ ወንዶች የሲቪል ልብስ የለበሱ ወታደሮች ነበሩይህ የሆነው ከጎዋ በተመለሰው ባቡር ላይ ነው	1
ልብሴን በለበሰ ሰው ተበድያለሁ	1
በአብዛኛው በአውቶቡሶች ስጓዝ ባቡሮች እና በእኔ ላይ ደረሰ	1
አንድ ሰው ወደ እኔ ቀረበና ሞቃት መስሎኝ ሊነካኝ እንደሚፈልግ ተናገረ በጣም ፈራሁ	1
ሰውዬው በጣም ርካሽ አስተያየቶችን እያስተላለፈ ነበርይህ የሆነው በሻህዳራ አውቶቡስ ማቆሚያ ላይ ከሁለት አመት በፊት በማለዳ ነበር	1
ጨዋነት የጎደለው ተጋላጭነት (ማስተርቤሽን)ጨዋነት የጎደላቸው አስተያየቶችያፏጫሉየሌሎችን አካል ማሾፍመነካት	1
ከልጃገረዷ አንዷን ሰው ስትጠብቅ አየሁ እና ያንን ሰው ለመጥራት እየሞከረች ነበር ይህ በእንዲህ እንዳለ እሷን ያሾፉባት እና ሊነኩዋት የሞከሩ ሶስት ወንዶች ልጆች መጡ	1
አንድ ሰው አግዳሚ ወንበር ላይ ተቀምጦ ሬዲዮን እያዳመጠ ነበርበእኔ ላይ አስተያየት ሰጠ እና ከዚያ እያለፍኩ እወድሻለሁ አለበዚያን ጊዜ አፍሬ ነበር	1
በ ጎረቤት ግልጽ ያልሆነ ቋንቋ በመጠቀምመጮህረብሻ መፍጠርመጥፎ አምፕ መጥፎ የሰውነት ቋንቋ	1
ምሽት ላይ ከወንድ ጓደኛዬ ጋር ነበርኩ ( አስተያየት ተሰጥቶኝ ነበር ኹማራ ብሂ ሃት ፓካድ ሎክት	1
በሁለት ሞተር ሳይክሎች ላይ ያሉ የወንዶች ቡድን አውቶማችንን ተከትለው ወደ ጎን እየመጡ እኛን ለማየት ቀጠሉ ችላ ስንል የበለጠ ጓጉተው በመጨረሻ ተነስተን እስኪሄዱ ድረስ አውቶሞቢሉን እየዞሩ ቀጠሉ	1
ሆን ተብሎ ለመቅረብ እና ለመንካት በመሞከር መጥፎ ንግግር	1
አንዳንድ ወንዶች ወደ እህቴ ቤት ስሄድ ያሾፉኝ ነበር በ ላይ የበለጠ ነቀፋቸው	1
አንድ ቀን ወደ ቤቴ በሚወስደው መንገድ ላይ እየተራመድኩ ሳለ እና ጨለመ ቀድሞውንም እኔን ማሽኮርመም የጀመሩ የወንዶች ቡድን ነበሩ በጣም ፈርቼ በፍጥነት ወደ ቤት ለመድረስ ሸሸሁ	1
ለታዳጊ ወጣቶች ተግባር እየሄድኩ ነበር እና ጥብቅ እርሳስ እና ከላይ ጠባብ ለብሼ የአሻንጉሊት ገበያን ሳልፍ ወንዱ ነጋዴው በአለባበሴ ኮድ ላይ አሉታዊ አስተያየት መስጠት ጀመረ እና ሰውነትዎ ለመያዝ ምን ያህል ጥብቅ እንደሆነ እወዳለሁ አለኝ ጥብቅ እና ትኩስ ሰውነትዎን ከእርስዎ ጋር እውነተኛ የግብረ ሥጋ ግንኙነት ይፈጽሙ	1
መኪና ለመያዝ እየሞከረች ብቻዋን ነበረች አንድ ሰው ተገቢ ባልሆነ መንገድ ሊነካት ሞከረ እሷም ፊት ለፊት ገጠማት እና ወደ ኋላ ጮኸች እና እሱ በብልሃት ችላ ብሎ አሁን የሆነውን ነገር የማያውቅ መስሎ ሄደ	1
የወንዶች ቡድን በእኔ እና በጓደኞቼ ላይ ፊታቸውን እየፈጠሩ ነበር	1
በሴቶች ላይ የሚፈጸሙ በደሎችን መጮህ ወይም ጥሩ አስተያየቶችን ማስተላለፍ ተገቢ ባልሆኑ ቦታዎች መንካት	1
በእግር እየተጓዝን ሳለ ጥቂት ሰዎች በእኛ ላይ አስተያየት ሲሰጡን	1
የሪክሾ ሹፌር በደል እየወረወረ	1
ከኮሌጅዬ ከወጣሁ በኋላ በራምጃስ ቀይ ብርሃን አቅራቢያ ባሉ እንግዳ ሰዎች አስተያየት ተሰጥቶኝ ነበርወሲባዊ አስተያየቶችን እየሰጡ ነበር	1
አንድ ሰው አስተያየት ሰጥቷል	1
ከገበያ ወደ ቤት ስንመለስ ሁለት ወንዶች ስለ እኔ እና እህቴ አስተያየት ሰጥተዋል	1
ልጄን ይዤ ባለፈው እሁድ ከቀኑ ፡ አካባቢ ወደ ሙምባይ ቬርሶቫ ባህር ዳርቻ ሄድኩ ውሃውን ለማየት ፈርቶ መጮህ ጀመረ የ ሰዎች ቡድን ወደ እኛ መጥተው ውሃውን እንዴት እንደሚፈሩ እርስ በርሳቸው መነጋገር ጀመሩ እና ወደ እኛ እየጠጉ ከበቡን እና በጣም አልተመቸኝም እና ቦታውን ለቅቄ መውጣት ነበረብኝ ለጓደኞቼ የይር ክስተትን ስገልጽ ከመካከላቸው አንዱ ምሽት ላይ መሄድ አስተማማኝ ቦታ እንዳልሆነ ነገረኝ	1
ወደ ቤት ስመለስ መኪናው ውስጥ ተቀምጠው ሲያዩኝ ጥቂት ሰዎች ነበሩ እኔን መከተል ጀመሩ እና አንዳንድ አስተያየቶችን አሳለፉ	1
ክስተቱ የተከሰተው ትምህርት ቤት እያለሁ ነው በክፍሌ ውስጥ ያሉ ወንዶች አላስፈላጊ ስም እያሉ ያሾፉኝ ነበር	1
ምሽት ላይ የወንዶች ቡድን ስም ሲጠሩ (በጣም ጨዋ ያልሆኑ) ተመልክተው መጥፎ ባህሪ ለመፍጠር ሞክረዋል	1
አንዳንድ ሰዎች በእኔ ላይ አስተያየት ይሰጣሉ	1
በፓርኩ ውስጥ እየተራመዱ ነበር እና ወንዶች ልጆች ስለ መልኬ አስተያየት ሰጡ	1
በአውቶብስ ማቆሚያ ላይ ከአንዲት ሴት ጋር መጥፎ ባህሪ ያለው ሰው	1
በአውቶቡስ ውስጥ ብቻዬን ነበርኩ እና የወንዶች ቡድን እያፏጨ አስተያየት እየሰጡኝ ነበር እንዲያውም ሊነኩኝ ሞከሩ	1
አንዳንድ ወንዶች ሴት ልጅ ደውለው እምቢ ስትል ስሟን መጥራት ጀመሩ እና ስለ ባህሪዋ አስተያየት መስጠት ጀመሩ	1
ምሽት ላይ አስተያየት መስጠት እና ጥሪዎች	1
ምሽት ላይጓደኛዬን እየጎበኘሁ ነበር እና አስተያየት መስጠት የማያቆሙ የወንዶች ቡድን ነበር (	1
ከትምህርት ቤት ስሄድ እና አንዳንድ ሴቶች ሲያልፉ አየሁ እና የወንዶች ቡድን እንዲህ ብሏቸዋል ሴቶች ወደዚህ ይመጣሉ አለበለዚያ ሁላችሁንም ያረግዛሉ	1
እኔና ጓደኞቼ እየተራመድን ነበር ያኔ የወንዶቹ ቡድን ከኋላችን መሄድ ጀመሩጥቅስ ማለት የጀመረው አንተ ጋር መቀላቀል እንችላለን ከዚያም በፍጥነት እንደገና ተጓዝን እነሱ አስተያየት ሰጥተዋል በፍጥነት አይራመዱ እና እኛን መከተል ጀመሩ እና ጥቅስ አስተያየት ሰጥተዋል የሴት ጓደኛዬ ትሆናለህ?ኮታ እምቢ ብለን በፍጥነት ተራመድንአሁንም ለጥቂት ደቂቃዎች ተከተሉን እና መከተል አቆሙ	1
አንዳንድ ወንዶች ልጆች በቡድን ሴት ልጆች ላይ አምልጠዋል	1
ከማላድ ጣቢያ መግቢያመውጫ ድልድዮች አንዱ የሚጀምረውየሚያበቃው በወንዶች የህዝብ መጸዳጃ ቤት አጠገብ ነው ሁል ጊዜ ብዙ ወንዶች እዚያ ይቆማሉ እንዲሁም ወደ ዋናው መንገድ የሚወስደው መንገድ ግቢ አለው እና ጠዋት ወይም ማታ ወንዶች እና ወንዶች እዚያ ቆመው የሚያልፉትን ሴት ሁሉ እያዩ አስተያየቶችን እየሰጡ እንግዳ የፊት ገጽታዎችን እና አቀማመጦችን ዘፈኖችን መዘመር በሴቶች ላይ በሚያልፉበት ጊዜ መቦረሽ እና የመሳሰሉት	1
በምሽት ወደ ቤት ስመለስ የወንዶች ቡድን ሊደፍረኝ ሞከረ ሆኖም ማምለጥ ቻልኩ	1
ጥቂት ወንዶች ከባቡሩ ይጮኻሉ ይህ ሁለት ጊዜ ተከስቷል	1
ጓደኛዬ በትምህርት አስተማሪዋ ተደፍራለች	1
አዎከኢንዲራናጋር ወደ ኮሌጅ ስሄድአይቶ ዘፈን መዘመር ጀመረ	1
በመንገድ ላይ በወንዶች የተላለፉ ጨዋ ያልሆኑ አስተያየቶች	1
ይህ ክስተት የተከሰተው ከ ዓመታት በፊት በቫለንታይን ቀን በኒርማን ቪሃር ሜትሮ ጣቢያ አቅራቢያ በሌሊት ነበር በሶስት ብስክሌቶች ላይ ያሉ ወንዶች ልጆች መጥተው በእኔ እና በጓደኛዬ ዙሪያ መዞር ጀመሩ	1
ወንዶች ልጆች በኮሌጅ ውስጥ ስለ እኔ አስተያየት ይሰጣሉ	1
ይህ ክስተት በቤቴ ፊት ለፊት ተከሰተ ልጅቷን የሚያሾፉድመት ደውላ ፎቶዋን የሚያነሱ የወንዶች ቡድን ነበሩ ልጅቷ ምንም ማድረግ አልቻለችም	1
አንዲት ልጅ ከትምህርት ቤት ወደ ቤት ስትሄድ አየሁ ጥቂት ወንዶች ልጆች እሷን አስተያየት ሲሰጡ ያሾፉ ነበር	1
ከትምህርት ቤት ወደ ቤት እየሄድኩ ሳለ አንድ ወንድ ልጆች ትልቅ ዳሌ አለኝ ስትል ከፊት ለፊታቸው ስትራመድ ስትናገር ሲያዩ አየሁ	1
	1
ምሽት ላይ በጣም አሳፋሪ በሆነች ሴት ላይ ጥቂት ወንዶች አስተያየት ተሰጥቷቸዋል	1
ትምህርት ቤት እያለሁ ነው የሆነው (እኤአ)ጓደኞቼ ሁል ጊዜ ከትምህርት ቤት ከተመለሱ ወንዶች ጋር በመንደሩ አንድ እና ሁለት ደረጃ ላይ በመጫወት እና በለጋ እድሜያቸው የግብረ ሥጋ ግንኙነት በመፈጸም ይዝናኑ ነበር ይህም ወደ እርግዝና ይመራቸዋል	1
ምሽት ላይ አንድ ወንዶች ሴት ልጅን ለመንካት እና አስተያየት ለመስጠት እየሞከሩ ነበር	1
በመንገድ ላይ በየቀኑ መሻገር ያለብኝ የወንዶች ቡድን ነበር በመዘመርና በፉጨት ያሾፉኝ ነበር	1
ከትምህርት ቤቶች አምፕ ኮሌጆች ከወጡ በኋላ የመንገዱ ጥግ ነውወንዶቹ እዚያ ተቀምጠውእና የትምህርት ቤቱን ልጃገረዶች እና የኮሌጅ ሴት ልጆች አስተያየት በመስጠት ቡድን ይመሰርታሉ	1
አንድ ቀን ከትምህርት ቤት ስመለስ የወንዶች ቡድን የፊት ገጽታን በማሳየት ተሳለቁብኝ እና በአለባበሴ ላይ አስተያየት ሰጡ	1
በ ሆቴል በኩል አልፈናል እና ብዙ ወንዶች እኛን እያሳደዱን እና አስተያየት መስጠት ጀመሩ ከሰአት በኋላ ሆነ	1
ወደ አጎቴ ቤት እየሄዱ ሳለ ሁለቱ ልጆች ስለ አለባበሴ አስተያየት ሰጡኝ	1
ወደ ቤት በምሄድበት መደበኛ መንገዴ ላይ ስሄድ ወንዶች ልጆች እያንዳንዱን እርምጃዬን መመልከት ጀመሩ እና አስተያየት መስጠት ጀመሩ እና እነሱን ስመለከት ጨዋነት የጎደለው ምልክቶችን ማድረግ ጀመሩ	1
በሆሊ በዓል ላይ አንድ ወንድ ሰራተኛ በሴት ሰራተኞች አፍ ውስጥ ቀለም በመቀባት በቢሮው ግቢ ውስጥ ውሃ አፍስሷል ምንም ችግር አልነበራትም እና ጉዳዩን ሪፖርት አድርጋለች	1
ይህ ሰው እኛን ማባረር ሲጀምር ከጓደኞቼ ጋር ትምህርት ቤት ነበርኩ	1
ሰዎች በባቡሩ ውስጥ እያለፉ ነበር እና እያዩኝ አስተያየቶችን እያስተላለፉ ነበር	1
ከሱቅዬ ወደ ቤቴ እየተመለስኩ ሳለ አንድ ሰው አስተያየት ሰጠኝ	1
በጓደኛዬ ላይ የሚያፏጩ ጥቂት ጎኖች አስተያየት ይሰጣሉ እና ተቃውሞ ስናሰማም ያስፈራራናል	1
በወንዶች ቡድን አስተያየት መስጠት እና ጨዋነት የጎደለው ድርጊት	1
የወንዶች ቡድን ፎቶ እያነሱኝ ነበር በጣም ተጨንቄ ነበር	1
ሔዋን ከ ወደ በአውቶቡስ ውስጥ እያሾፈች	1
ቀጣይነት ያለው አስተያየት ነበር ከዚያ በኋላ ቦርሳዬ በሌሊት ተነጠቀ	1
አስተያየቶችን ማለፍ	1
በዳውላ ካውን ሁል ጊዜ እዚያ የሚንከራተቱ አንዳንድ ሰዎች ከዚያ በሚያልፉ ሴት ልጆች ላይ አስተያየት ይሰጣሉ	1
በመንገድ ዳር እየተራመድኩ ነበር በድንገት በብስክሌት ላይ ያሉ አንዳንድ ሰዎች አስተያየት ሰጡኝ	1
በሌሊት ሰአታት ውስጥ ነበርጥቂት ወንዶች በአጠገቧ ስላለፈች ሴት አስተያየት ሲሰጡ ነበር	1
በመንገድ ላይ ስሄድ አስተያየት የሚሰጡኝ እና የሚያፏጩኝ አንዳንድ ወንዶች ነበሩ	1
ክስተቱ የተፈፀመው ምሽት ላይ በሳትያ ቤተ መንግስት ጎዳና ላይ ነው በዚህ ቀን ከትምህርት ትምህርቴ እየመጣሁ ነበር እና አንድ ሳይክል ላይ ያለ ሰው በፉጨት አስተያየት ሰጠ	1
ሰንሰለት መንጠቅ	1
የምኖረው በላክስሚ ባውግ ሲዮን ነውእና ከጣቢያው መንገድ እስከ ቻውል መግቢያ ድረስ በተዘረጋው መንገድ ላይ ሱቆች አሉ በሺቫር የእንግዳ ማረፊያ መስመር ላይ ብዙ ጊዜ ቆሻሻ የሚመለከቱ እና ቆሻሻ አስተያየቶችን የሚያልፉ ሙስሊም ባለሱቆች እና የጫካ ልጆች አሉ ይህ በየቀኑ ይከሰታል ይህ ክስተት ሁላችንም በዚህ አካባቢ ያሉ ልጃገረዶች እና ሴቶች እንኳን አጋጥመውናል ባለሥልጣናቱ በእነዚህ ሁሉ ጨካኞች በአደገኛ ሁኔታ በሚሞላው በዚህ አካባቢ የፖሊስ ዳስ እዚህ ማቆም ያልቻሉት ለምን እንደሆነ አልገባኝም እባክዎን ያግዙከ ውጭወደ ሺቫር የእንግዳ ማረፊያወደ ላክስሚ ባውግ በመሄድ	1
ይህ ሰው ወደ ኮሌጁ ስሄድ መኪናውን ከፊት ለፊቴ አስቆመው እና ፎቶዎችን ጠቅ አደረገ ምንም ማድረግ ስላልቻልኩ ፊቴን ደብቄ ሸሸሁ	1
በእኔ ሰፈር የወንዶች መገናኛ አለ እዚያ ይሰበሰባሉ ሴት ልጅ እዚያ ሲሰበሰቡ ማለፍ ምቾት አይሰማትም	1
ጓደኛዬ ሁል ጊዜ በሳንጃይ ካምፕ ውስጥ ካለው የመጸዳጃ ቤት ግቢ አጠገብ ባለው ሰው ይንገላቱታል በዙሪያዋ ማንም አይረዳም እና ትፈራለች	1
ጸያፍ አስተያየቶችን ማለፍየፊት ገጽታን መስጠት ምሽት ላይ ተከስቷል	1
ተማሪ ነች እና ጠዋት ላይ ስትጓዝ እንኳን ደህንነት አይሰማትም በየቀኑ ማለት ይቻላል ጥቃት ይደርስባታል ነገርግን እስካሁን ምንም አይነት እርምጃ አልወሰደችም ወይም ለማንኛውም የፖሊስ ባለስልጣን ሪፖርት አድርጋ አታውቅም	1
ከጓደኛዬ ጋር በመንገድ ላይ እየተራመድኩ ነበር እና አንድ ሰው አስተያየት አለፈ በቃላት መለሰልኝ	1
አንተ ማጭበርበር እና የነገራቸው ነገሮች	1
ወደ ቤተ ክርስቲያኔ ስሄድ ጥቂት ሰዎች አባረሩኝ	1
ከትምህርት ቤት ከጓደኛዬ ጋር ነበርኩ ከዛም በመንገድ ማዶ የተቀመጡ አንዳንድ ወንዶች ስሟን እየጠሩ ያፏጩ ጀመር	1
ተገቢ ባልሆነ ልብስ ስለለበስኩ ነገሮችን አልሰጠኝም ባለው ባለሱቅ ተበድሏል	1
የሜትሮ ጣቢያ እስክደርስ ድረስ ወንድ ልጅ ያለማቋረጥ ይከተለኝ ነበር አስተያየቶችን አሳልፎ በእጁም ነክቶኛል	1
መንካት እና በጣም አጸያፊ መንካትምሽት ላይ በሜትሮ ጣቢያ ላይ ክርን እና እጆችን መያዝ	1
ከሳሎን እየተመለስኩ ነበርእዚያም የልጃገረዶች ቡድን ስለ እኔ አስተያየት ሰጡኝ ኮታ ተመልከት ጀግናው እየመጣ ነው	1
መንገድ ላይ ስሄድ አንድ ያልታወቀ ሰው ያሾፍብኛል	1
አንድ ሰው በዳክ ፓርክ መግቢያ ላይ ቆሞ ነበር ወደ ፓርኩ ስገባ አንዳንድ አገላለጾችን ተናገረ ችላ አልኩት እና በኃይል አስቆመኝ እና ስለ ፕርሶናል ዝርዝሮቼ ሊጠይቀኝ ጀመረ	1
አንዳንድ ወንዶች በጊንጥ መኪና ውስጥ ይራመዳሉ እና ልጃገረዶችን ለመጥለፍ ይሞክራሉ ከምሽቱ ሰዓት በኋላ ደካማ መብራት	1
ይህ የሆነው በ ወደ ቢሮዋ እየሄደች ያለች ግለሰብ ጠባቂዋ በአለባበሷ ላይ አስተያየት ሲሰጥ ስትመለከት ነው ራሷን የቻለች ሴት በመሆኗ ጠባቂውን ችላ ብላ ወደ ሥራ ሄደች በእለቱ በህብረቱ ስብሰባ ጉዳዩን ለህብረቱ ዋና ኮሚቴ አሳወቀች በዚህም ምክንያት ማህበሩ በጸጥታ ኤጀንሲው ውስጥ በጠባቂው ላይ ቅሬታ ያቀረበ ሲሆን በሶስት ቀናት ጊዜ ውስጥ ጠባቂው በሌላ ተተካ	1
የዘፈቀደ ትምህርት ቤቶች ወንዶች በጣም መጥፎ አስተያየቶችን አልፈዋል	1
በሌሊት ሰአታት ውጭ በነበርኩበት ወቅት ብዙ አስተያየት በመንገዴ ላይ መጣ	1
አንድ ሰው በአውቶቡስ ውስጥ ስለመታየቴ ብዙ አስተያየቶችን አስተላልፎ ያለማቋረጥ ትኩር ብሎ አየኝ	1
ጓደኛዬ በአንድ ወንድ ተበድሏል ወይም አስተያየት ሰጥታለች እና ምላሽ ሳትሰጥ ስትቀር ሊነካት ሞከረ	1
መንገዱን እያቋረጥኩ ሳለ አንድ የጭነት መኪና ወደ ውስጥ መጥቶ ያየኝ እና ኮትኪያ ዱናዳር ማአል ሃይ ኮታ የጮኸኝ ልጅ ነበር እና እንደ ሲኦል አለቀስኩ	1
ወደ መጸዳጃ ቤት በሄድኩ ቁጥር እዚያ የቆሙት ሰዎች ጸያፍ አስተያየቶችን ያስተላልፋሉ እና መጸዳጃ ቤት ለመጠቀም በጣም አስቸጋሪ ያደርጉኛል ይህንን ሁል ጊዜ ያደርጉታል	1
ከቡድን ጋር ገበያ ወጣሁ እና አንዳንድ ወንዶች ልጆች ያሾፉብን ጀመር	1
በእግሬ ላይ አስተያየት መስጠት	1
ከእህቴ ጋር በገበያ ገበያ እየተዘዋወርኩ ነበር በዘፈቀደ ያረጀ ሰው ኮትኪያ ማታክ ራሂ ሃይኮት እያለ ጆሮዬ ላይ ወጣ	1
አስተያየት መስጠት እና ጥሪዎች ምሽት ላይ ተከስቷል	1
ሁል ጊዜ ወንዶች (ባያስ (ከሽንት ጣቢያው በፊት ባለው ምልክት አጠገብ ወደ ሲዮን ጣቢያ እስከሚወስድዎት ደረጃ ድረስ) የሚቀመጡ ወንዶች አሉ እነዚህ ሰዎች በሚያልፉ ልጃገረዶች ላይ ቆሻሻ አስተያየቶችን ሲያስተላልፉ ወይም ጥንዶች ከታክሲዎች ወይም ከአውቶሞቢሎች ሲወጡ የመኪና ማቆሚያ ስለሆነ በጣም ያስፈራሉ ከምሽቱ ሰዓት በኋላ ሁል ጊዜ እዚያ የቆመ መኮንን ጥያቄ እባካችሁ እርዱየጽዮን ጣቢያ ሽንት ቤትሽንት ቤት ከጣቢያ በፊት እስከ ድንጋይ ደረጃ ድረስ ካለው የሲዮን ጣቢያ በፊት	1
በብስክሌቱ ላይ የነበሩ ሁለት ሰዎች በጣም ቀርበው በብስክሌቱ እና በእነሱ መካከል ተዘግቼ ነበር መንቀሳቀስ አልቻልኩምሳቁ እና አጉላ	1
በአውቶቡስ ውስጥ አንድ ሰው ሊነካኝ ሞከረ እና በአካባቢው አንዳንድ አካባቢዎች የወንዶች ቡድን ርካሽ ዘፈኖችን እየዘፈኑ ነበር	1
በሕዝብ ማመላለሻ ውስጥ ስጓዝብዙ ጨዋነት የጎደላቸው ክስተቶች ሲከሰቱ አይቻለሁ እንደዚህ አይነት ሁኔታዎችን ለማስቆም እንኳን ተነሳሽነቱን ወስጃለሁ (እኤአ) ብዙውን ጊዜ የሚከናወኑት በምሽት ሰዓታት ውስጥ ነው	1
በፌስቡክ መለያዬ ላይ የብልግና መልዕክቶችን ልክልኝ	1
ድርጊቱ የተፈፀመው በመንደሬ የ አመት ሴት ልጅ በመጀመሪያ በልጁ የቃላት ትንኮሳ ሲደርስባት በመጨረሻ ልጅቷ ጫካ ውስጥ እያለች ደፈረባት እና መኖ እየሰበሰበ	1
በሜትሮ ውስጥ ስጓዝ እየተደናገጥኩ ነበር	1
የኮሌጄን ፊት ለፊት መንገድ እያቋረጥኩ እያለ	1
ካምፓሴ ውስጥ እስክደርስ ድረስ ሰውዬው እየተከተለኝ ቀጠለ	1
አንዲት ሴት አጭር ቀሚስ ለብሳ ተረከዝ ለብሳ በመንገድ ዳር በቆሙ የወንዶች ቡድን ትሄዳለች ሰዎቹ እንዴት ጨዋነት የጎደለው ልብስ እንደለበሰች መጮህ ጀመሩ ልጅቷ ልብሷን ማውለቅ እንደምትችል በመፍራት ተረከዙን ለመሮጥ ተገደደች	1
በቀን ውስጥ በአውቶቡስ ውስጥ ትንኮሳ	1
ጠርቶኝ ጨዋነት የጎደለው ነገር አነጋገረኝ	1
አዎከመሬት አጠገብ እያወዛወዘእያሳደደ እና እያፏጨ	1
በብስክሌት ላይ ያሉ ሰዎች የሴት ሰንሰለት ለመንጠቅ ሞክረዋልከሁለት ቀናት በኋላ ኮሌጃቸውን ለቀው ስለሚወጡ ልጃገረዶች አስተያየት ሲሰጡ ታይተዋል	1
ጥሪ እና አስተያየት መስጠት	1
ከእናቴ ጋር ስገዛ እያሳደደኝ የነበረ እና ቆሻሻ አስተያየቶችን የሚያስተላልፍ ሰው ነበር	1
ማየት እና ጨዋነት የጎደላቸው አገላለጾችን እና መንካት እና ሁሉንም በማድረግ ይህ ሁሉ በአጠቃላይ በሜትሮ እና አውቶቡሶች ውስጥ ይከሰታል ምሽት ላይ በአውቶቡስ አጠገብ ብታልፍም ተገቢ ያልሆኑ አስተያየቶች እና ሁሉም ሰለባ ልትሆን ትችላለህ	1
እኔና ጓደኛዬ እየተጫወትን ነበር እና ጠባቂው ስልኩን ቁ ቺት ውስጥ ወርውሮ ሸሽቶ ደጋግሞ እያስጨነቀባት ነበር	1
በጣቢያው ውስጥ ደህንነት አይሰማትም በየቀኑ ማለት ይቻላል ጥቃት ይደርስባታል	1
እዚያ ትምህርት ቤት ስመጣ ከወንዶች ጋር ተገናኘሁ እነሱ ተማሪዎች ነበሩ በአንድ እጄ ቲፊን ለእህቴ ይዤ ነበር እና በሌላ በኩል የአካል ብቃት እንቅስቃሴ መጽሐፍ በእኔ ላይ ኮከብ እያደረጉ ነበር እና ከጥቂት ደቂቃዎች በኋላ ከዕቃዎቼ ጋር ሊሸከሙኝ እንደሚችሉ በመናገር መጥፎ አስተያየት ማለፍ ጀመሩ	1
የማውቀው ሰው ዋዝ በሜትሮ ውስጥ ያዘ እና ነካ	1
ጥሪዎች እና መጥፎ አስተያየት	1
ወደ ቤቴ ስሄድ አንድ ሰው አስተያየት እየሰጠኝ ነበር	1
ወደ ኮሌጁ ስሄድ የወንዶች ቡድን በአለባበሴ ዘይቤ አስተያየት ሰጥተዋል	1
አስተያየት ተሰጥቶኝ ተነካሁተጨቃጨቅኩ	1
በካሮል ባግ አውቶቡስ ውስጥ እያለን አንድ ልጅ ተገቢ ባልሆነ መንገድ እያየን ነበርይህ የሆነው ከ ወራት በፊት ምሽት ላይ ነው	1
በአካባቢው የሰንሰለት ነጣቂ ክስተት አጋጥሞኛል ፡ ተገቢ ባልሆነ መብራት ምክንያት ለማንም ደህንነቱ የተጠበቀ አይደለም	1
ምሽት ላይ ስጓዝ ቀላል ቲ እና ጂንስ ለብሼ ሳለሁ እንኳን ወንዶቹ አስተያየት እስካልሰጠበት ጊዜ ድረስ አይናቸው ወደ ኋላ አይመለስም ወይም መንካት ጀመረ	1
ብዙም አልተከሰተም ነገር ግን አሁንም ደህንነት አሳሳቢ ነው	1
ሌላ ተሳፋሪ አጋጠማት በለበሰችው ቀሚስ ትንኮሳ ደረሰባት ሁለት ሰዎች በእሷ ላይ አስተያየት እናስተላልፋለን	1
እዚህ ሁኔታው በጣም መጥፎ ነው በእውነቱ በአስደሳች እና በኒግት ለመዞር በጣም አስቸጋሪ ነው	1
በሜትሮ ጣቢያ በሴት ልጅ ላይ አንዳንድ አስተያየቶች ሲተላለፉ ሰምቻለሁ በ አካባቢ ምሽት ላይ ተከስቷል	1
ሔዋን አላስፈላጊ ነገሮችን መናገር እና የተወሰነ ጊዜ መንካት	1
ከሰአት በኋላ በነበርኩበት ወቅት ሰዎች ቆሻሻ አስተያየቶችን ሰጥተዋል	1
አንድ ቀን ከሰአት በኋላ ከጓደኛዬ ጋር እየተራመድኩ ሳለ አንድ ጥግ ላይ አንዳንድ ወንዶች ልጆችን አገኘን እና በጓደኛዬ ላይ አስተያየት መስጠት ጀመሩ	1
ከኮሌጅ በኋላ እንደተለመደው ወደ ሆስቴሌ እየተመለስኩ ነበር እና አንዳንድ የአካባቢው ሰዎች ቺንኪ ብለው ጠሩኝ	1
የወሲብ ግብዣ	1
እህቴን ተከትሎ የመጣው ሰው አስተያየቶችን አስተላልፎ ሊነካካት ሞከረዶንግሪ ከሳቡ ሲዲክ ሆስፒታል ወደ ሻሊማር	1
ፎቶ እያነሳሁአስተያየቶችን በማስተላለፍ ትንኮሳ እና ውርደት ተሰማኝ	1
ይህ የሆነው ባለፉት ቀናት በሌሊት ነው ወደ ቤት ስሄድ ወንዶች ልጆች በአንድ ጥግ ላይ ተቀምጠው አየሁ አንዲት ልጅ በዚያ መንገድ ስትሻገር እነዚህ ሰዎች በእሷ ላይ አስተያየት ሰጡ ችላ ብላ ሄደች	1
አስተያየት በሚሰጡ እና በሚያዩ ሰዎች ተረብሸዋል	1
አንድ ሰው አስተያየቶችን አልፏል እና ከኋላ ሊነካኝ ሞከረ ከቀኑ ሰአት አካባቢ ሆነ	1
እኔና እህቴ ጨርቅ ለመግዛት ወደ ገበያ እንሄድ ነበር በእግር ስንጓዝ ከወንዶች ቡድን ጋር ተገናኘን እና እህቴን ማሾፍ እና አስተያየት መስጠት እና ፊልም እንድትሰራ መጋበዝ ጀመሩ ተሸማቀቅን ግን መቆም አልቻልንም እኛ ብቻ እናርቃቸዋለን እና እንጓዛለን	1
በቡድን ውስጥ አንድ ላይ የሚሰባሰቡ ወጣት ወንዶች ቡድንአብዛኛውን ጊዜ ድመት ደውለው ወይም በሚያልፉ ሴቶች ላይ አስተያየት ይሰጣሉ	1
በዋናው ገበያ ላይ ተከስቶ የወንዶች ቡድን አልፈው አስተያየት መስጠት ጀመሩ	1
ክስተቱ የተከሰተው ኮሌጅ እያለሁ ነው በአገናኝ መንገዱ የወንዶች ቡድን ውስጥ ሲያልፉ አስተያየቶችን ያስተላልፋሉ እና ያሾፉ ነበር ይህ ሁኔታ በአገናኝ መንገዱ እንድሄድ ተስፋ አድርጎኛል	1
በብስክሌት ላይ የነበሩ ሁለት ሰዎች የእኔን ዱፓታ ለመንጠቅ ሞክረው ስቃወም የብልግና አስተያየቶችን አልፈዋል	1
ይህ የሆነው ከቀኑ ሰዓት አካባቢ ባቡሩ በላክስሚናጋር መድረክ ላይ እስኪመጣ እየጠበቅኩ ነበርበዚያን ጊዜ አንዳንድ ወንዶች ልጆች ሊነኩኝ እና አስተያየት ሊሰጡኝ ሞከሩ	1
በቲኬት ቆጣሪው አቅራቢያ በእኔ እና በቡድኔ ላይ አስተያየቶች ተላልፈዋል	1
ብዙ ሰው በአደባባይ መጥፎ እና ጸያፍ ቃላትን ሲናገር ሰምቻለሁ የአካል ክፍሎቼን እና ፊሽካዬን ለመንካት እንኳን ይሞክራል	1
አንዳንድ ወንዶችን ሲራመዱ ወይም ወንዶች ልጆች እያዩ እና አስተያየት ሲሰጡ ነበር ምሽት ላይ ሆነ	1
በጎዳና ላይ ልጆቼን ክፉኛ ተሳለቁብኝ	1
ከሱቅ ውጭ ነበርኩ አንድ ሰው ከኋላው መጥቶ ሲነካኝ የሆነ ነገር አስተያየት ሰጠ እና ሄደ	1
ምሽት ላይ ተበላሽቷል	1
ወደ ጫጩቶቹ የሚወስዱት መንገዶች ጠባብ ናቸው እና ወንዶች ልጆች ከመንገድ ወጣ ብለው ይቆማሉ እና ሴቶቹ እንዲያልፉ መንገድ አይሰጡም በእነሱ ላይ አስተያየቶችን ያስተላልፋሉ እና ዘፈኖችን ይዘምራሉ በመንገድ ላይ ካሮም የሚከፍሉ የወንዶች ቡድንም አለ	1
በሜትሮ (ሜትሮ) ውስጥ በሚጓዙበት ወቅት ከሰዓት በኋላ ተከሰተ በሁሉም የዕድሜ ክልል ውስጥ ያሉ ሰዎች ያለማቋረጥ እያዩ እና አስተያየት እየሰጡ ነበር	1
በሱቁ ውስጥ አንዳንድ ወንዶች ልጆች ሴት ልጆችን እያዩ እና አስተያየት ሲሰጡ ነበር	1
አንዳንድ ወንዶች በእኔ እና በጓደኞቼ ላይ መጥፎ አስተያየቶችን ያስተላልፉ ነበር	1
አንድ ሰው በባቡር መስመር ላይ ተቀምጦ ትምህርት ለመቀጠል እርጅና እንዳለብን ነገረን	1
ሰዎች በ ላይ እየነኩ እና እየተንከባለሉ ነው አንተን በማየት ላይ አስተያየት መስጠት	1
ከካንሃይያ ናጋር ሜትሮ ጣቢያ ወደ ቤቴ በሚወስደው መንገድ ላይ የመንግስት ትምህርት ቤት ወንዶች ልጆች ቡድን ወደ እኔ ቀርበው በዙሪያዬ ቡድን ፈጥረው የጆሮ ማዳመጫዬን በጣም ነጠቁ እና አስተያየት መስጠት ጀመረ ከምሽቱ ሰአት አካባቢ ሆነ	1
የወንዶች ቡድን በልብሴ ላይ ብልግና አስተያየቶችን አስተላልፏል	1
ዓይነ ስውር የሆነች ሴት ልጅ ወደ ፕላት ከቁጥር አቅጣጫ እንድትሄድ እንድታሳየው ጠየቀቻት ቢቲ ልጅቷ በተሳሳተ መንገድ ሊነካት የሞከረበትን መንገድ ስትነግረው	1
ከምሽቱ ሰዓት ላይ ተገቢ ያልሆነ የአምፕ አደገኛ ባህሪ	1
ብዙውን ጊዜ ሶስት (የኮርስ ህግ ተላላፊዎችን) በብስክሌት ላይ ሲጋልቡ ያስቀምጡ እንደ ፣ (ግልቢያ ያስፈልገዋል?) ያሉ አስተያየቶችን ያስተላልፋሉኮታ አንዳንዶቹ ወደ እግረኛው ልጅ በጣም ተጠግተው ወደ ፊት አይተው ፈገግ አሉ ይህ ትዕይንት በትራፊክ ምልክቶችም የተለመደ ነው በ አጋጣሚዎች ከሰዎቹ አንዱ የሚበር መሳም ሰጠ ይህ የሚከሰተው በሰፊ ቀን ብርሃን እንዲሁም ከምሽት ውድቀት በኋላ ነው በአንድ ኦካሲዮን ሰዎች የት እንደምንኖር እንዳያውቁ እነሱን ለማጣት ስንሞክር እኔን እና ጓደኛዬን ለ ሰአት አሳደዷቸው በመጨረሻም መሮጥ ነበረብን ሁሉም ከላይ የተገለጹት ግኝቶች የተከሰቱት ባለፈው ወር በህዳር እና በታህሳስ መካከል ነው	1
አንድ ሰው በማለዳ ሊሠራ ነበር በመንገድ ዳር ቻፓቲ እና ባቄላ የሚሸጡ የሴቶች ቡድን አገኘ ስለ እሱ ማውራት ጀመሩ እሱ ያደረጋቸውን እና በግብረ ሥጋ ግንኙነት ሲሳለቁ ሰውየው ደበዘዘ	1
አንድ ሰው በእኔ ላይ ቆሻሻ አስተያየቶችን አስተላልፏል	1
ከሰዓት በኋላ እና ምሽት ላይ ይከሰታል	1
ከጓደኞቼ ጋር ከትምህርት ቤቴ እየተመለስኩ ነበር እና አንድ ልጅ ስኩቲ ላይ ያለ ልጅ የስኩቲ ፍጥነቱን ቀነሰው ግራ ተጋባሁ ነገር ግን እሱን ችላ ለማለት ወሰንን ትንሽ ርቀት ከተራመድን በኋላ ያንን ልጅ እንደገና አየን በመንገዱ ዳር ስኩቲውን አቁሞ ነበር እና ያለማቋረጥ እያየ ነበር እና አስተያየቶችን ማስተላለፍ ጀመረ በዚህ ጊዜ ግን ችላ ከማለት ይልቅ በዚህ ጉዳይ ላይ ካላቆመ ለፖሊስ ቅሬታ እንደምናቀርብ አስጠንቅቀነዋል	1
ወንዶች ልጆች ርካሽ አስተያየቶችን ይሰጡ ነበር	1
አንድ ሰው በእኔ ላይ አስተያየት ከሰጠ በኋላ ደጋግሞ ሊያናግረኝ ሞከረ እና ቁጥሬን ጠየቀኝ	1
በብስክሌት ላይ ያሉ የወንዶች ቡድን ከጓደኞቼ ጋር ስሄድ ብልግና አስተያየቶችን አልፈው ጮኹ	1
ብስክሌተኞች መጥተው አስተያየት ሰጡኝ እና ተሳደቡኝ	1
አንድ ቀን ጠዋት ወደ ኮሌጅ ስሄድ የ አመት ሰው ከእኔ ጋር መጥፎ ባህሪ እያሳየኝ እና ጸያፍ ቃላትን እየተጠቀመብኝ ነበር	1
አንዲት ሴት በጭቃማ አካባቢ ባለ ተረከዝ ጫማ ይዛ ቀስ ብላ ትሄድ ነበር አንዳንድ ወንዶች በዚህ አይነት ጫማ መራመድ ካልቻላችሁ ለምን ይለብሳሉ? ሴትየዋ አንድም ቃል አልተናገረችም በአስቂኝ ዓይኖች ብቻ ተመለከተቻቸው እና ሄዱ	1
ጓደኛዬ ኮሌጅ ልትገባ ስትል በወንዶች ቡድን ተነካች እና ተናደደች	1
አዎበቤተ መቅደሱ አቅራቢያ ባለው ጋሊ ውስጥአንድ ሰው አስተያየት ሰጠ እና እያየኝ ነበር	1
ዛሬ በባቡር ድልድይ ደረጃ ላይ ስወጣ አንድ ሰው ልጅ ምን እየሰራህ ነው? ያስደነግጠኛል ከዚህ በፊት የከፋ ነገር ሰምቻለሁ	1
በመንገድ ላይ በ ሰዎች ቺንኪ እና ባህሪ ተባልኩ	1
ብዙ ጊዜ ምሽት ላይ በአቅራቢያው ያሉ ወንዶች እና ወንዶች በጥላ አካባቢ ይንከራተታሉ	1
በጠዋት ሰአታት ጓደኛዬን እየጠበቅኩ ብቻዬን ተቀምጬ ሳለሁ ተከታታይ አስተያየቶች እና ፊሽካዎች ነበሩ	1
በእግር ወይም በስኩተር በሚጋልቡበት ጊዜ ሰዎች ስለ እኛ አስተያየት ይሰጣሉ	1
አንዳንድ አሽከርካሪዎች ሲራመዱ ትኩር ብለው ያያሉያፏጫሉይቀራረባሉወዘተ	1
በብቸኝነት ጎዳና ላይ እየሄድኩ ነበር ሁለት ወንዶች ልጆች ኮቱኦ ብሃይ ብሁት ጂያዳ ጋርሚ ሆ ጂ ሃይ ጥቅስ በብልግና ቃና አስተያየት ሰጥተዋል	1
በአውቶቡስ ብቻዬን ወደ አክስቴ ቤት እሄድ ነበር አንድ ሰው መጥቶ ያናግረኝ ጀመርመጀመሪያ ላይ ችላ አልኩትእሱ ግን በጨዋነት አነጋገረኝ በአውቶብሱ ውስጥ ለአንዲት አክስት ስለ ጉዳዩ ቅሬታ አቀረብኩለት እና ወቀሰችው	1
ሁለት ወንዶች ልጆች የመዋቢያ ዕቃ ትተውኝ በሕዝብ መኪና ውስጥ ፎቶዬን በማንሳት ሊሳቡኝ ይሞክራሉ	1
አርብ አመሻሽ ላይ ነበር ከቀኑ አካባቢ ከትምህርት ቤት እየተመለሰች ነበርየወንዶች ቡድን ሁሉንም አይነት ስሞች እየጠሩ እና እያፏጩ መከተል ሲጀምሩ ነበር	1
አንድ ስኩቲ የለበሱ ሁለት ወንዶች ልጆች በእኔ እና በጓደኛዬ በጣም አታላይ በሆነ መንገድ ኮታሄሎኮት እያሉ አለፉ	1
እኛ ሶስት ሴቶች መንገዱን ስናቋርጥ ወደ ስምንት በሚጠጉ ወንዶች የተሞላ ነጭ ታታ ሱሞ በድንገት ቆመ እኛን ጮኹን እና የምንሰራውን መስሎን ደጋግመው እንዲያውቁ አጥብቀው ጠየቁንእኛን ለመከተል የሀይዌይ አካፋዩን እስከማቋረጥ ድረስ የአውቶቡሳችን መቆሚያ ሹፌሩ ሞተሩን እየሮጠቡድኑ ውስጥ ከፍተኛ አስተያየት ሲሰጥ ቆይቷልበሩን ለመክፈትም የማስፈራሪያ ምልክቶችን አድርጓል እና ተሽከርካሪውን ከጎናችን መሮጡን ቀጠለ በመጨረሻ በድንጋጤ ወደ ኋላ ተመለስን እና ሜትሮችን ወደ ቢሮአችን ሮጠን	1
አውቶቡሴን ስጠብቅ አስተያየቶች ተላልፈዋል	1
በጣም በታጨቀ ማይክሮ አውቶብስ ከትምህርት ቤት ሲመለስ ከመቀመጫዬ አጠገብ ያለ አንድ ሰው እዚህም እዚያም ሊነካኝ ሞከረ	1
እህቴ ኮሌጅ ስትገባ የሰዎች ቡድን ትኩር ብለው ይመለከቷታል እና መጥፎ አስተያየቶችን ያስተላልፋሉ በተቻለ መጠን በማቋረጥ ሊነኩዋት ይሞክራሉ	1
ወደ መጸዳጃ ቤት ግቢ በሄድኩ ቁጥር እንግልት ይደርስብኛል	1
ሃይስለሴቶች ደህንነት ሁሉንም ነገር ማሳወቅ እፈልጋለሁስለ ናግፑር ከተማ ማሃራሽትራ፣ህንድ ማሳወቅ እፈልጋለሁአይ ኤም ስለ አንድ የተወሰነ አካባቢ ሳይሆን ስለ እያንዳንዱ መንገድ እንደ ባቡር ጣቢያዋና መንገድወዘተ ማውራት ነውበማንኛውም መንገድ አሁን ስለ እዚህ አለ የጎዳና ላይ ልጅየሱቆች አገልጋይ ስለ ሴት ልጆች ሁል ጊዜ ይቀልዳል እንደ ሴተኛ አዳሪ እያዩዋቸው ነው እያንዳንዱን ሴት ልጆች አስጸያፊ ቃላትን እንደሚጠቀሙ አድርገው ይመለከቷቸዋል እጠይቃችኋለሁእባክህ ስለዚህ አካባቢ አንዳንድ እርምጃ ውሰድ አመሰግናለሁ!	1
ኦግሊንግ እና አስተያየት	1
ከቤቴ አጠገብ ትንሽ ግሪል ፋብሪካ ነበር አብዛኛው ሰራተኛ ወንድ ነው አንድ ቀን ልገዛ ነበር አንዳንድ ወንዶች ልጆች ተሳለቁብኝ በግድግዳ እና በቫን ላይ ሻካራ ቃላትን እንኳን ይጽፋሉ	1
አውቶቡስ ውስጥ ስጓዝ አንዳንድ በአሥራዎቹ ዕድሜ ውስጥ የሚገኙ ወንዶች ልጆች ያፏጫሉ እና የማይረባ አስተያየት ሰጡ	1
ምሽት ላይ ከሜትሮ ጣቢያ ውጭ አስተያየት መስጠት	1
ለቤቴ ቅርብ በሆነው በሴክተር ኔሩል ጨዋነት የጎደለው ንግግር ተደረገብኝ	1
ጡቴን በክርኑ እና በእጁ ለመንካት ሞከረ	1
ከሰአት እና ከማታ ተከሰተ	1
ከሰአት በኋላአስተያየት ተሰጥቶኝ በፉጨት ተናገርኩ ካስጠነቀቅኳቸው በኋላም አልተናደዱም	1
በማይክሮ አውቶብስ ውስጥ ነበርኩሴት ልጅ መሆኔን ተረዳሁ አንዳንድ ወንዶች ያሾፉብኝ እና መሪው ወደ መቀመጫዬ ቀረበ ምንም ማድረግ ስላልቻልኩ ጮህኳቸው እና ከአውቶቡስ ወረድኩ	1
ድመት አስተያየት እና መጥፎ የፊት ገጽታዎችን ይጠይቃል	1
አንድ ሰው እያፏጨ እና አስተያየት እየሰጠኝ ነበር	1
በ አመት አካባቢ ያለ ሰው በሞገድ ገንዳ አዝናኝ እና የምግብ መንደር ጉራጌን ውስጥ አግባብ ባልሆነ መንገድ በመንካት	1
ከሰአት በኋላ ከጓደኛዬ ጋር ከትምህርት ቤት እየተመለስኩ ነበርአንዳንድ ወንዶች ልጆች ጸያፍ አስተያየቶችን እየሰጡ ነበር ወር ሆኖታል	1
ከጓደኞቼ ጋር ከኮሌጅዬ ውጭ ወደሚገኙ መክሰስ ድንኳኖች እየወጣሁ ነበር እና እነዚህ ሰዎች በእኛ ላይ የብልግና አስተያየቶችን ማስተላለፍ ጀመሩ	1
ከቀኑ ሰአት ላይ ከኤርፖርት እየተመለስኩ ነበርከዚያ ከቡድሃ የተወሰኑ ወንዶች በብስክሌት ተከተሉኝወደ ትምህርት ቤቴ ተከታትዬ የቻልኩትን ያህል ሮጥኩ	1
ወንዶቹ እየተከተሉ ነው ንክኪዎች	1
መንገድ ላይ ስሄድ አንድ ሰው እጄን እየጎተተ ነበር	1
በተጨናነቀ ቦታ ላይ ስለነበርኩ በጣም የሚረብሽ የኮትቹት ቻት ደጊኮት የሆነ ነገር የነገረኝ ሰው ነበር የተጨናነቀ ቦታ ስለነበር እና ሰዎች እርስ በእርሳቸው እየተገፉ ስለነበር ወዲያውኑ ምላሽ መስጠት አልቻልኩም በእኔ ላይ የደረሰውን ሳውቅ እሱ አስቀድሞ ሄዷል እና ያለበለዚያ እሱ አሁንም እዚያ ቆሞ ቢሆንም እንዴት ምላሽ እንደምሰጥ አላውቅም	1
በአቅራቢያው በሚገኝ ሱቅ ወተት ለመግዛት ስሄድ አስተያየት ተሰጥቶኝ ነበር	1
በኢንዲራ ናጋር አቅራቢያ ባለው መሬት ላይ አስተያየት መስጠትማፏጨት እና ማወዛወዝ ነበር	1
አንድ ሰው ነክቶኝ ተሰማኝ	1
አንዳንድ የወንዶች ቡድን እያፏጨ እያወዛወዘ አስተያየት እየሰጠሁ እና ፎቶግራፍዬን ሳነሳ ያለ	1
የታመመ ህክምና	1
አንድ ወንድ ልጅ ሴት ልጅን ለመንካት እየሞከረ ነበር እና ምንም ማድረግ አልቻለችም	1
ምሽት ላይ ሲራመዱ ከመኪናዎች ወይም በቡድን ያሉ ሰዎች መጮህ ማፏጨት ይጀምራሉ	1
በማለዳ የእግር ጉዞ ወቅት አንድ ሰው ዋዜማ ተሳለቀበት እና ስም መጥራት እና አስተያየት መስጠት ጀመረ ነሐሴ ቀን ሆነ	1
ፎቶዎቼም ተነስተዋል ለፖሊስ ቅሬታ አቅርቤ ነበር	1
የወንዶች ቡድኖች በብሎክ ዋና መንገድ ላይ ባለው የሻይ ድንኳን ዙሪያ ቆመው የሴቶችን ልብስ እያዩ እና አስተያየት ይሰጣሉ አንዳንዴም ፎቶ ያነሳሉ	1
ኮሌጅ እያለን የቀጣይ ፋኩልቲ ልጅ ጓደኛዬን ሳያስፈልግ አምፕ ይከተላት ነበር የማይረባ አስተያየት ይሰጥና አእምሮዋን ይረብሽ ስለነበር ይህንን ክስተት ከእኔ ጋር አካፍላለች እና ይህን ጉዳይ ለአስተባባሪ እናታችን አጉረመርመናል ከዚያ በኋላ ያንን ሰው አላየንም	1
አንድ ሰው በአደባባይ	1
በራጂቭ ቾክ በምሽት ሰዓትበመንገድ ዳር አስተያየት መስጠት ፊት ለፊት	1
እኔ እና ጓደኞቼ ከትምህርት ቤት ወደ ቤት እየሄድን ነበር አንዳንድ ሰዎች ከእኛ ጋር መዋጋት ሲጀምሩ በመጥፎ ቃላት አስተያየት እየሰጡን ነበር	1
በመንገድ ላይ እየተራመድኩ ነበር እና አንዳንድ ሰዎች ና እንነጋገራለን ማለት ጀመሩ እና ይህ ምቾት አልሰጠኝም	1
ምሽት ላይየድመት ጥሪዎችን አድርጌያለሁአስተያየት ስሰጥ እና እያየሁ ነው	1
አንድ ቀን በሕዝብ ማመላለሻ ወደ ትምህርት ቤት እሄድ ነበር ለመቆም ምንም ቦታ አልነበረም እና ከተወሰነ ጊዜ በኋላ አንድ ሰው ከኋላው እንደያዘኝ አገኘሁ ምን ማድረግ እንዳለብኝ አላውቅም ነበር ክፉኛ ቆንጥጬዋለሁ እና በጣም መጥፎ መልክ ሰጠሁት	1
በአካባቢው ያሉ ጥሪዎችአስተያየቶችመነካካት እና ሌሎችም	1
በመንገድ ላይ እየተንከራተትኩ ሳለ ፖሊሶች ልጅቷን እያዩ ስለ ከንቱ ሴት ልጅ እያወሩ ነበር	1
በቡድን ስጓዝ ምሽት ላይ ነበር ( ጥቂት ሰዎች ያለማቋረጥ እያዩ እና አስተያየት ሲሰጡ እና እያሳደዱ ነበር (	1
አስተያየት መስጠት እና ማቃለል	1
በዳዳር ጣቢያ ዋና ድልድይ ላይ ነበርኩ እና በጣም ተጨናንቆ ነበር አንድ ሰው አግባብ ባልሆነ መንገድ ነክቶኛል እና ዝም ብዬ ጮህኩት በድልድዩ ላይ ጥቂት ፖሊሶች ስለነበሩ ሊረዱኝ ቢሞክሩም በዙሪያው ያሉት ሰዎች ትብብር ስላልነበራቸው ሊያገኙት አልቻሉም	1
የወንዶች ቡድኖች በሚያልፉ ሴቶች ላይ ብልግና አስተያየቶችን ብቻ ሳይሆን በፉጨት እና በመሳቅ እና አንዳንዴም ሴት ተሳፋሪዎችን በመንካት ላይ ተሰማርተዋል	1
ሁለት ወንድ ልጆች በአውቶቡስ ፌርማታ ላይ ምስሎቼን ጠቅ ለማድረግ ሞከሩምን እየሰሩ እንደሆነ ስጠይቃቸው ላይ ጥቃት ይሰነዝሩብኝ ጀመር	1
በሮሂኒ ውስጥ በአጠገቧ ስታልፍ እና ሜትሮ ስትሳፈር እያየች ስለነበረች ልጅ አስተያየት ስትሰጥ ይህ ክስተት የተከሰተው ምሽት ላይ ነው	1
ወደ ክፍሌ እየሄድኩ ነበር ሰዎች አንድ ተሳዳቢ ነገር ሲጮሁብኝ እና የሆነ ነገር አስተያየት ሲሰጡኝ	1
በማንኩርድ ባቡር ጣቢያ ደካማ መብራት	1
ከሰአት በኋላ በዲዲኤ ፓርክ ጓደኛዬ ላይ ደረሰ ከፈተናዋ በኋላ ከትምህርት ቤት እየተመለሰች ሳለ በዙሪያዋ ያሉ ወንዶች ልጆች ማፏጨት እና አስተያየት መስጠት ጀመሩ በሌሊት ተመልሰው መጥተው እንደሚወስዷት ነገሯት	1
ከሰአት በኋላ መኪና እኔን መከተል ጀመረ (ወደ ቤት ለመመለስ በአደጋ ውስጥ ስጓዝ ቤቴ እስክደርስ ድረስ አላቆሙም ()	1
የ አመት የትንኮሳ አይነት በኛው ማርች በአግሊንግ (ሌህ) (ምሽት) ካትካልስ ዊስትልስ በስካልዛንግሊንግ እና በሌህ ገበያ በ (በቀን ሰአት) በሌህ ትምህርት ቤት አስተያየት መስጠት (በቀን ሰአት) የወሲብ ግብዣ በሌህ ገበያ (በቀን ሰአት) ሌሎች ስልክ ይጠይቃሉ ቁጥር (ምሽት)	1
ይህ ክስተት የተፈፀመው ከቀኑ ሰአት አካባቢ ነውየወንዶች ቡድን በሴት ልጅ ላይ አስተያየት ሲሰጡ እና እንደ ባለጌ እያዩ ነበር	1
አስተያየት መስጠትመደወልያፏጫልመንካት	1
አርብ ዕለት በስራችን ድግስ እያደረግን ነበርወደ ቤት ለመምጣት ዘግይቼ ነበር ስለዚህ በማኪና መድረክ ላይ ስወርድ ወደ ቤት ልወስደኝ ሞተር ሳይክል ወሰድኩ የሞተር ሳይክል ሹፌሩ ወደ ቤት ከመውሰድ ይልቅ ሊደፍሩኝ ወደ ፈለጉበት ጓደኛው ወሰደኝእርዳታ ለማግኘት ፈልጌ ነበር እናም በመታገል ሂደት ልብሴን ቀድደው ሸሹ	1
ይህ ክስተት የተከሰተው በሴፕቴምበር ቀን ከቀኑ ሰዓት አካባቢ ነው ጓደኞች እየሄዱ ነበር እና አንዳንድ ሰዎች አስተያየት መስጠት ጀመሩ	1
በመኪናው ውስጥ የተቀመጡ ሰዎች ቡድን ሪክሾን ተከትለው በሪክሾ ውስጥ ከተቀመጡት ልጃገረዶች ጋር ለመነጋገር እየሞከሩ እና ከፍተኛ አስተያየት እየሰጡ ነበር	1
አንዲት ልጅ ተሳለቀች እና ለስራዋ ስትሄድ ጥቂት ወንዶች ልጆች አስተያየት እየሰጡባት ነበር	1
ሜትሮ እየጠበቅኩ ነበር እና ከኋላዬ የቆመ አንድ ሰው አስተያየት ሲሰጥ እና እያየኝ ነበር	1
አንዳንድ ልጃገረዶች ከአውቶቡስ ቆመው ወደ ቤት ተከተሉኝ እነሱ እንደሚያውቁኝ ነገር ግን ስለእነሱ ሙሉ በሙሉ አልታወቀኝም እኔ ብቻዬን ስለነበርኩ መጥፎ አስተያየት እያስተላለፉ ነበር እና መዋጋት አልቻልኩም	1
በአካል ትንኮሳ ወሲባዊ ግብዣዎች	1
አንድ ጊዜ ከጓደኛዬ ጋር በቡድሃ የገበያ አዳራሽ ለመግዛት እየሄድኩ ነበር እና የወንዶች ቡድን ነበር ስለእነዚያ ወንዶች ልጆች አልታወቀኝም አንድ ልጅ እያየኝ ነበርእኔን እያወከኝ እና በራስ የመተማመን ስሜት እንዲሰማኝ እና እንድፈራ አድርጎኛል በኋላ ላይ ዓይኖቹን ብልጭ ድርግም በማለት አንዳንድ የፊት ገጽታዎችን ማሳየት ጀመረ እና ሁሉም አቅመ ቢስ ሆኖ ተሰማኝ	1
በጎዳና ላይ ስሄድ የ አመት ወንድ ልጆች አጠገቤ ነበሩ እና ፊርማቸውን ከፍተው ያፏጫሉ እና በኋላ ላይ እየሳቁ አስተያየት እየሰጡ ነበር	1
ከትምህርት ቤት ወደ ቤት ስሄድ አንዳንድ ልጃገረዶች በወንዶች ሲሳለቁባቸው እና ልጃገረዶቹ በጣም ምቾት ሲሰማቸው አየሁ	1
ተነቅሎ አስተያየት ሰጥቷል	1
በማለዳአስተያየት ተሰጥቶኝ ነበር	1
ከጠዋቱ ሰዓት አካባቢ በተጠናቀቀ ድግስ ላይ ተገኝቼ ነበር ወደ ቤት ለመመለስ ሪክሾ ማግኘት ችያለሁ ብቻዬን ለመጓዝ አስቀድሜ አውቄ ነበር ነገር ግን ሪክሾ የሰከረ በሚመስልበት ጊዜ የበለጠ ፈራሁ ማስጠንቀቂያ ቢሰጥም በፍጥነት እየነዳ ነበር እና እንዲያቆም ስጠይቀው ወደ ፊት መንዳት ቀጠለ ጮህኩና በቁጣ ስነግረውወርጄበት ቦታ ላይ ቆመ እና እሱን እንኳን ሳልከፍለው በፍጥነት ሮጠ ይህ ክስተት በእኔ ላይ ትልቅ ምልክት አድርጎብኛል	1
ብዙ አስተያየቶች ነበሩ (ከመካከላቸው አንዱ ከሰአት በኋላ ውጭ በነበርኩበት ጊዜ ኮታቻማክ ቻሎኮት ነው	1
የሜትሮ ጣቢያ እስክደርስ ድረስ ወንድ ልጅ ያለማቋረጥ ይከተለኝ ነበር አስተያየቶችን አስተላልፎ በእጁም መታኝ	1
ፎቶግራፎችን ማንሳትፊሽካዎችአስተያየት መስጠትንግግር ማድረግ	1
ጥቂት ሰዎች አደረጉት	1
ጨዋነት የጎደለው አስተያየት በየቀኑ ማለት ይቻላል	1
ጓደኛዬ ከሰራሁ በኋላ ወደ ቤት እየሄደ ነበር በመንገድ ላይ አንዳንድ ወንዶች ልጆች ነበሩ ምሽቱ ነበር እና ጓደኛዬ ብቻውን ነበር አንዳንድ ወንዶች ልጆች ያሾፉበት እና ያፏጩዋት እና ምቾት ተሰምቷት ሸሸች	1
አንዳንድ ወንዶች ልጅቷን ለመንካት እየሞከሩ ነበር እና መጥፎ ቃላትን ለእሷ ይሰጡ ነበር	1
አንዳንድ ወንዶች በብስክሌት ላይ ነበሩ እና በ ውስጥ እንድናልፍ አልፈቀዱልንም	1
ወደ ጓደኛዬ ቤት ለመሄድ ቀይ ቀሚስ ለብሼ ነበር አንድ ልጅ ቀይ ቀሚስ በእኔ ላይ ጥሩ መስሎ እንደሚታይ የሚገልጽ ዘፈን ዘፈነ	1
የወንዶች ቡድን አስተያየት መስጠት ጀመረ እና ከመካከላቸው አንዱ ፎቶአችንን ተናገረ ስለዚህ ሁላችንም ጮህን እና ሰዎች ተሰብስበው ስልኩን ወሰዱት	1
ከአሰልጣኝነት ክፍሎቼ የመጡ አንዳንድ የወንዶች ቡድን የስልኬን ቁጥሬን ይጠይቁ ነበር	1
ልጁ ልጅቷን በጉዞ ላይ እያለች ሊነጥቃት ሞከረ	1
ትምህርት ቤት እያለሁ አንድ ልጅ አለ አንድ ቦታ በሄድኩ ቁጥር ሁል ጊዜ እኔን የሚመራኝ አንድ ልጅ ሁል ጊዜ ይከተለኛል የ ኛ ቀን የጎዳና ላይ ሰዓቴን ያብጣል	1
አንድ ልጅ ፎቶዬን አንስቶ ሳያስፈልግ አስተያየት እየሰጠኝ ነበር	1
ያልተገባ ተነካሁ	1
አንድ ሰው በቀይ መብራት ሳሪስን ይሸጥ ነበር ልገዛው ፈቃደኛ ስላልሆንኩ ሻሽሚሽ በማለት ምሽት ላይ ከእይታ ጠፋ	1
በሴቶች ላይ የዘፈቀደ አስተያየቶች	1
ከጓደኛዬ ጋር ወደ ቤት ስንሄድ የወንዶች ቡድን ይደውሉልን ጀመርን እና ችላ እንላቸዋለን ከዚያም እኛን ማሳደድ ጀመሩ ያለማቋረጥ ያንገላቱናል	1
አንዳንድ ወንዶች በሩ ላይ ይህ ሲዲ የሚሸጡበት ሱቅ ነው በዚያ መንገድ በሚያልፉ ወይም በሚራመዱ ልጃገረዶች ላይ አስተያየት ይሰጣሉ	1
ከቤት በወጣሁበት ደቂቃ ይጀምራል እነዚህ ዳቦዎች ወደ አንተ ተጠግተው ከትንፋሻቸው በታች የሆነ ነገር ለማጉተምተም ይሞክራሉ ወይም ጮክ ብለው ምን ያህል ቆንጆ እንደሆኑ አንድ ነገር ይናገራሉ መልሶ ለማነጋገር ብዙ ሙከራዎች አልረዱም ለእነሱ ሰፊ የመዝናኛ ዘዴ ብቻ ስለሆነ በዙሪያው ያሉ ሰዎች ጣልቃ አይገቡም	1
እዚህ ልጃገረዶች ተገርመዋል አስተያየት እንስጥ	1
በማይክሮ አውቶብስ አጠገቤ ተቀምጦ የነበረ አንድ አዛውንት ነክቶኝ ነበር ለኮሌጄ ከአውቶብስ ስወጣ ያ ሽማግሌ የታችኛውን ክፍል ነካው እዚያ የነበሩት ሁሉም ሰው አይተዋል ነገር ግን ማንም ትንሽ የተናገረው የለም	1
በሕዝብ መኪና ውስጥ ሲጓዙ አካላዊ ጥቃት	1
በ የእግር ጉዞ አካባቢ ተከስቷልየትምህርት ቤት ተማሪዎች ስልክ ቁጥራቸውን በመጠየቅ ልጃገረዶችን እያበሳጩ ነበር	1
በሲፒ () ውስጥ በመንገድ ላይ ሲራመዱ አንዳንድ ወንዶች ልጆች በብስክሌት መጡ እና ዱፓታዋን ነጥቀው በጣም ስለተጎዳ ለ ወራት ከቤቷ ውጭ ስላልመጣች በጣም ተጨነቀች	1
ጓደኛዬ ከትምህርት ቤት ስትመለስ በአንዳንድ የአካባቢው ወንዶች ልጆች አስተያየት ተላለፈላት	1
በአንድ ሰው ማዋከብ ወይም ማየት ወይም በአንድ ሰው ማሾፍ የተለመደ ነው	1
ወደ ሥራ ልሄድ ነበር ከአካባቢያዬ የመጣ ሰው ወደ እኔ ሲቀርብ አየሁ ስሜን ጠየቀኝእምቢ ስልመንገዴን ዘጋውና እያየኝ ቀጠለ ገፋሁት እና ሄድኩ	1
አስተያየት ተሰጥቶኝ ከሰአት ላይ በፉጨት ጮህኩ	1
የወንድ ጓደኛዬን ለማግኘት ወደዚያ ኮሌጅ ሄጄ የወንዶች ቡድን ከኮሌጁ በር አጠገብ ቆሞ ምናልባትም አንድ ማራኪ ሆኖ ካገኙት ክፍሏ ወይም ኮሌጅ ውስጥ የትም እስክትደርስ ድረስ ይከተሏታል እናም በእኔ ላይ ተከሰተ እና ሙሉ በሙሉ ተከትለው አንዳንድ አስተያየቶችን እንኳን ያስተላልፋሉ እና የሰውነት ቅርጽ ይሠራሉ	1
የ አመት ሴት ልጅ በ አመት ልጅ ስትመታ አይቻለሁ	1
በአቅራቢያው በሚያልፈው የሴት ልጅ ቀሚስ ላይ አሰቃቂ አስተያየቶችን የሚያስተላልፉ ወንዶች ምሽት ላይ በሜትሮ (ፒታምፑራ) ውስጥ ተካሂዷል	1
ሰንሰለት እየነጠቀእና ሰዎቹ የማይረባ አስተያየቶችን እየሰጡ ነበርእና ጨዋነት የጎደለው የፊት ገጽታ	1
ምልክቱን ሲያቋርጥ አንድ ሰው በብስክሌት ተቀምጦ ጠራየተወሰነ እርዳታ የሚጠይቅ መስሎኝ ነበርነገር ግን ስሄድ አሳዛኝ ፍላጎቱን እንድፈጽም እየጠየቀኝ ነበር	1
በዳዳር ጣቢያ ድልድይ ከፍተኛ ሰዓት በሚበዛበት ወቅት ተቆርጧል	1
መጥፎ ዘፈኖችን ማየት	1
ምሽት ላይ ትንኮሳ	1
ከጥቂት ቀናት በፊት በጋንጋ ራም ሆስፒታል ፊት ለፊት በሰንሰለት ሲነጠቅ አየሁ	1
ትናንሽ ድንጋዮችን በልጃገረዶች ላይ መወርወርአስተያየት መስጠትበዳውላኩዋን ማፏጨት	1
አንድ ጊዜ ድልድዩን አቋርጬ ስሄድ ጓደኛዬ ተገፋና ተገፋ እና እንግዳው ደረቷን ያዘ	1
ከአሰልጣኝነትዬ እየተመለስኩ ነበር ወንዶች ልጆች ቆመው እንድሸኛቸው ጠይቄ አስተያየት ሰጠኝ	1
የአንደኛ ደረጃ ማለፊያ ሲያድስ በሴቶች ልዩ ቆጣሪ ላይ ትንኮሳ እና እንግልት ደርሶበታልከኋላ ያለው ሰው ትኬቱን ገዝቶ ወደ ኋላ እንድጠብቅ ፈለገ እምቢ አልልም እና ሊገፋኝ ሞከረ ፎቶውን አንስቼ ጸያፍ ምልክቶችን መስራት ጀመረ	1
የሶስት ሰዎች ቡድን በአንድ ሱቅ ውስጥ በአንዲት ልጅ ላይ አስተያየቶችን እያስተላለፉ ነበርእሷን ጥግ ሊያደርጉት ተቃርበው ነበርከሰአት በኋላ ከቀኑ ሰአት ላይ ሆነ	1
እንደ ኮትቺንኪኮት ያሉ አስተያየቶችን የሚያልፉ እና የሚስቁ አንዳንድ ወንዶች ነበሩ ምሽት ላይ ሆነ	1
በባቡር ውስጥ ስጓዝ አንድ ሰው ጀርባዬ ላይ ነካኝ	1
በመንገድ ላይ ትንኮሳ	1
ከላንጋታ በመጣ ማታቱ ውስጥ አንዳንድ ሰዎች በማታቱ ተሳፍረው አጠገቧ ተቀምጠው መወከል ቀጠሉሌቦች መሆናቸውን ወይም አለመሆናቸውን ማወቅ ስላልቻለች አልተመቸችም ነበር	1
በመንገድ ላይ ሲራመድ አንድ ልጅ አስተያየት ሰጠኝ	1
እኔና ጓደኞቼ ወደ ካርተር መንገድ ሄድን እና ትንሽ እየተዝናናን ነበር በድንገት ጓደኛዬ አንድ ሰው ፎቶ ሲያነሳ አስተዋለ እናም ወደ እሱ ሄደን ስልኩን እንዲያሳየን ነገርነው እና ምስሉን አግኝተን ሰርዘነው ሰውየውን በጥፊ መትተን ሄድን	1
በኮሌጅ ውስጥ የቡድን አጋራችን ዘፈኖችን ይዘምር ነበር ወይም ለሥዕላችን ለአንድ ቀን ሲጋብዝ ወይም ሲያሾፍብን አስተያየት ይሰጥ ነበር	1
አንድ የዘፈቀደ እንግዳ ወደ እኔ መጣ እና በልብሴ ላይ አሰቃቂ አስተያየቶችን ሰጠ	1
ከሰአት በኋላ በሰሜን ካምፓስ ተከስቷል በሪክሾ ላይ እያለ የወንዶች ቡድን የተመረጡትን ምድቦች በማድረግ ተከተሉት	1
ወደ ኮሌጅ በሚወስደው መንገድ ላይ በዲቲሲ አውቶቡሶች ውስጥ አስተያየት መስጠት እና መግፋት ተካሂዷል	1
መደበኛ አስተያየት እና እይታ	1
አንድ ሰው በፀጥታ ሊከተለን እየሞከረ ነበር እና በኋላ ላይ በመንገድ ላይ አስተያየቶችን ማስተላለፍ ጀመረ ( በሌሊት ሰዓታት ውስጥ ተከስቷል	1
ይህ ክስተት የተከሰተው እኤአ በ ከጠዋቱ ሰአት አካባቢ የወንዶች ቡድን በአውቶቡስ ስጓዝ አስተያየት ሰጥተዋል	1
በጠዋት እና ከሰዓት በኋላ ይከሰታል	1
ወንዶች ኩርታ በለበሱ ልጃገረዶች ቡድን ላይ አስተያየት እየሰጡ ነበር	1
አንድ ሰው ሂጅራ ብሎ ጠራኝ እና መጥፎ ነገር እንደሚያደርግልኝ	1
ከስታንገር ርካሽ አስተያየቶችን መስማት የሚያበሳጭ ስሜት ይሰማዋል	1
አንድ ሰካራም ስለ እኔ አስተያየት እየሰጠ እና በጣቢያው ላይ ፎቶዬን ለማንሳት እየሞከረ ነበር	1
ሰውዬው ያለምክንያት እያየኝ ነበር	1
በአውቶቡስ ፌርማታ ላይ አውቶቡስ እየጠበቅኩ ነበር የወንዶች ቡድን ወደ እኔ ቀርቦ አስተያየት መስጠት እና የፍቅር ዘፈኖችን መዘመር ጀመረ	1
የከተማዋ አዲስ ዘመን እየተባለ የሚጠራው ቾክራስ በዚህ ሀይቅ ዳር መንገድ አጠገብ የመከማቸት እና ሁለቱን የጎማ ተሽከርካሪ የተሳፈሩ ሰዎችን በተለይም ሴቶችን የመምታት አዝማሚያ አላቸው	1
ጠዋት ላይ በአውቶቡስ ውስጥ አንድ ልጅ ያለማቋረጥ ለ ሰዓት ትኩር ብሎ ተመለከተ	1
ከኮሌጅ ስመለስበአውቶቡስ እና ሁለት ፌርማታዎች ስላጋጠሙኝ ብቻበእንግሊዘኛ በትክክል በነዚያ ቃላት ሳይሆን ስለተነገረኝ በእኔ ላይ ቆንጥጬ ነበር በጥፊ ልመታው እችል ነበርነገር ግን ሁለቱም እጆቼ ሞልተው ቦርሳዬ ጀርባዬ ላይ ነበር እንዲሁም እንዲሁ ምሽት ላይ በጣም የተጨናነቀ ስለሆነ ምንም ለማድረግ በቂ ቦታ አልነበረኝም ይህ ቢቆም እመኛለሁ	1
እኔ ወንድ ልጅ ነኝ ከትምህርት ቤት ልጄ ወደ ቤት ስመለስ በመልክዬ ላይ አስተያየት ሰጠችኝ	1
ጠዋት ላይ ኮሌጅ ልገባ ነበር አንደኛው ሰው ከላይ ወደ ታች እያየኝ እና የፍትወት ቀስቃሽ አስተያየት ሰጠ	1
ወደ እናት ቤቴ ስሄድ ቁጥሬን ልሰጠው ከቻልኩኩባንያ ብፈልገው ወዘተ	1
አስተያየት ተሰጥቶኝ ነበር	1
የቦምቤይ ጎዳናዎችን መሻገር (ፔዳር ራድ) በታክሲ ማድረቂያዎች እና ብስክሌተኞች የተላለፉ አስተያየቶች	1
ከጓደኞቼ ጋር ወደ ክበቡ እየሄድኩ ሳለ በቫን ድመት ውስጥ የነበሩ ሁለት ሰዎች በትራፊክ መብራት ላይ ሲቆሙ ደውለውልን	1
ይህ ክስተት ከአንድ ሰው ጋር በአንድ አካባቢ ሁለት ጊዜ አጋጥሞኛልበሁለት ዓመት ጊዜ ውስጥ እኤአ በጥር የተጠቀሰው ሰውያኔ ትንሽ ጨካኝራሰ በራ ሰውከቤቴ ትንሽ ራቅ ብዬ ሳለሁ መንገዴን ተሻግሮ ነበር ጨዋ ይመስላልእና አሁን የተገነዘብኩትን ብስክሌት ይጠቀማልግማሹ የተሰበረ ወይም የማይገኝ ታርጋ አለው ከዚያም ተሻግሮ ተመልሶ መጣብልቱ ከሱሪው ላይ ተጣብቆ ከመንገዱ ተቃራኒ ጎን ቆሞ እንድመለከት ጠየቀኝ ማስተርቤሽን ነበር ምላሽ ለመስጠት በጣም ደነገጥኩ እና በምሰራበት ጊዜ እሱ ጀርባው ላይ ተነስቷል በቅርቡያው ሰውአሁን የበለሳን እና ወፍራም የሆነውእንደገና በዚያው መንገድ መንገዴን አቋርጦበዚህ ጊዜ ከህንጻዬ አጠገብ ነበርኩ ሰውዬ…	1
ከ ቀናት በፊትበማዳንጊር ሲ ብሎክ ለትምህርቴ እየሄድኩ ሳለአንዳንድ ሰዎች አስተያየቶችን አስተላልፈዋል ምሽት ላይ ሆነ	1
አንድ ጊዜ ከምሽቱ ሰዓት አካባቢ እራት ለመብላት ከሄድኩአንዲት ልጅ ስትከተላት እና አንዳንድ ጨዋ ያልሆኑ ሰዎች አስተያየት ስትሰጥ አየሁ ()	1
በመኪና ውስጥ ከጎኔ የተቀመጠ መካከለኛ እድሜ ያለው ሰው ሆን ብሎ እንደ ፓኬት መወርወር ወይም ፀሐያማ በሆነ ቀን ለዝናብ ከአውቶሞቢሉ በሁለቱም በኩል ያሉትን ፕላስቲኮች ለመሳብ በሚሞክር የውሸት ተግባራቱ ሊነካኝ እየሞከረ ነው	1
ወደ ቤት ስመለስ በጣም ደነገጠኝ እና ተከተለኝ እና ለመነጋገር ሞከረ	1
ከገበያ እየተመለስኩ ነበር እና በመንገድ ጥግ ላይ ወንዶች ቆመው አንዲት ልጅ በአጠገቧ ስታልፍ አስተያየት ሲሰጡ አየሁ ልጅቷ ዝም ብላ ችላ ብላ አለፈች	1
በሚያልፈው ጠማማ ጸያፍ አስተያየቶች	1
በመንገድ ላይ በሴቶች ላይ የሚደርስ ጥቃት ሁለቱም ሴቶች ናቸው	1
የተሳሳተ ባህሪ	1
ከሰአት በኋላ ነበር በጣም መጥፎ አስተያየት ሰጡ እና በዴሊ ሜትሮ ውስጥ የሞኝ ቀልድ ሰነጠቁ	1
ለጠዋቱ ክፍል አውቶቡሱን በቆመበት ስጠብቅ በመንገዴ ላይ ተከታታይ አስተያየቶች እና እይታዎች ይመጣሉይህም በጣም አስቂኝ ነው	1
አንድ ሰው ሆን ብሎ ወደ እኔ ገባ ይዤ በጥፊ መታሁት	1
በአውቶቡስ ውስጥ ወንዶች ልጆች ሴት ልጆችን ይገፋሉ እና ይወድቃሉ እና ለመቅረብ ይሞክራሉ በአብዛኛው ወንዶች እንደዚህ አይነት ከንቱ ነገር ያደርጋሉ	1
ምሽት ላይ በሜትሮ ውስጥ አስተያየት መስጠት	1
የ በር በኮሌጁ ህንጻ ጀርባ ላይ የባቡር ቅኝ ግዛት እያደረገ ነውበየቀኑ የዚያ ህንፃ ወንዶች እና ወንዶች ልጆች የኮሌጅ ተማሪዎችን (ልጃገረዶችን) በማየትአስተያየት በመስጠትየፊት ገጽታ እና የኮሌጅ ፕሮፌሰሮች በዚህ ላይ እርምጃ አይወስዱም	1
መንገዱን እያቋረጥኩ ሳለ አንዳንድ ወንዶች ልጆች ከመንገድ ዳር ቆመው ነበር ፎቶዎቼን አንስተው የብልግና አስተያየቶችን እንኳን አስተላልፈዋል	1
አስተያየት መስጠት ከሰአት በኋላ ተከሰተ	1
ማየት እና አስተያየት መስጠት	1
አንዳንዶች ተገቢ ባልሆነ መንገድ ከኋላዬ ነካው የመንገድ መብራቶች ውጤታማ አይደሉም በጣም ጨለማ ነበር	1
በብስክሌት የሚጋልቡ ወንዶች ስለ እኛ አስተያየት ይሰጣሉ	1
አንድ ጊዜ ወደ ካምፓሴ እየሄድኩ ሳለ በአውቶቡስ ጣቢያ ውስጥ ያለ ልጅ ከእኔ ጋር መምጣት ፈለገ እንዳይከተል ነገርኩት ነገርኩት ነገር ግን ወደ አውቶቡስ ሊከተለኝ ሞክሮ የአውቶቡሱ ሹፌር ወረወረውአንድ ጊዜ አንድ ሰው በየቦታው ይከተለን ሲጀምር እና በመጨረሻም ወሲብ ፈፅሞናል ወዘተ	1
ባቡሩን እየጠበቅኩ ሳለ አንድ ሰው ያለማቋረጥ እያየኝ ነበር	1
የወንዶች ቡድን በእኔ ላይ አስተያየት እየሰጡኝ ነበር	1
በረሃ በሆነ የመኪና ማቆሚያ ቦታ ወደ መኪናዬ እየሄድኩ ነበርአንድ ልጅ ከኋላው ያዘኝ እና ሊነገሩ የማይችሉ ነገሮችን አደረገ	1
ከሴፍዋች የቀረቡ ሪፖርቶች	1
በሜትሮ ጣቢያው ደረጃ ላይ እየወጣን ሳለ የተወሰኑ ሰዎች በእኔ እና በጓደኞቼ ላይ አስተያየት እየሰጡ ነበር	1
ከጓደኞቼ አንዱ ወሲባዊ ትንኮሳ ደርሶበታል መንገድ ላይ ስትራመድ ሰውዬው እንደተሰማት ተሰማት	1
በሆንዳ ተክል ውስጥ የምሰለጥነው እኔ ብቻ ስለሆንኩ ሁሉም ሰው ያዩኝ ነበር	1
በሪክሾ ውስጥ ሳለሁ ወንዶች ልጆች አስተያየቶችን እየሰጡ እኔን ሊነኩኝ እየሞከሩ ነበር	1
ወደ ቤት እየሄድኩ ነበር እና አንድ ወንድ ተከተለኝ እና ጓደኝነት እንድፈጥር ጠየቀኝ መሮጥ ጀመርኩ እና እሱ ደግሞ ከኋላዬ መሮጥ ጀመረ ከዚያም እኔን ፈልጎ ህንጻዬን በሙሉ ቃኘ	1
ጓደኛዬ ምሽት ላይ ወደ ገበያ በሄደ ቁጥር ሁለት ወንዶች ልጆች ያፏጫሉ እና በሰውነቷ እና በልብሷ ላይ አስተያየቶችን ያስተላልፋሉ ይህ የሚሆነው በካማድ መንገድጎዳና አቅራቢያ ነው	1
አንድ ቀን ከሰአት በኋላ ወደ ሥራ ልሄድ እና በማሃራጃ ሲግናል አቅራቢያ ባለው መንገድ ላይ እሄድ ነበር በዚህ አካባቢ ወደ የሚጠጉ የብዙ ወንዶች ቡድን አየሁ ሁሉም ከህንድ ሰሜናዊ ክፍል የመጡ ይመስሉ ነበር በዱፓታ በተሸፈነ ጨዋ የሳልዋር ካሜዝ ውስጥ ነበርኩ በቡድኑ ውስጥ ካሉት ሰዎች አንዱ ኮቲ አንቺን በጣም በሚያዋርድ መልኩ እወዳለሁ እያለ ጮኸኝ አሁንም ይህ በፖለቲካዊ ተነሳሽነት የተነሳ ይመስላል እራሳቸውን እንደ አምላክ እና አማልክት በሚቆጥሩ የሰሜን ህንዶች ነጭ ቆዳ ያላቸው ቡናማ ቆዳ ያላቸው እና ጥቁር ቆዳ ያላቸው ደቡብ ህንዶች ግን ጅራቶች እና የህንድ ክፉ ጠንቋዮች ናቸው ነጭ ቆዳ ያላቸው የሰሜን ህንድ ሴቶች እንደ…	1
የ አመት እድሜ ያለው የትንኮሳ አይነት በ በአግሊንግ (ሌህ) በኛው ማርች (ምሽት) ካትካልስ ዊስትልስ በስካልዛንግሊንግ ሌህ (በቀን ሰአት) በትምህርት ቤት አስተያየት በሌህ (በቀን ሰአት)	1
ልክ እነዚህ ሁለት ሰዎች በእኔ ላይ ሲያልፉ እና እንድሰማ በጣም የሚያዋርድ ነገር ሲያጉረመርሙ በባቡር ሊሳፈሩ ነበር	1
አንዳንድ ወንዶች ልጆች ለሴት ልጅ አንዳንድ ጸያፍ አስተያየቶችን ሲያስተላልፉ የሚያሳዩት መጥፎ ባህሪ	1
ከጓደኞቼ ጋር ስሄድ በብስክሌት ላይ ያሉ የወንዶች ቡድን	1
ጨዋነት የጎደለው አስተያየት	1
የወንዶች ቡድን አብረው ስለ እኔ አስተያየት ሲሰጡኝ በራስ የመተማመን ስሜት እንዲሰማኝ ያደርጉኛል	1
ከትምህርት ትምህርቴ በኋላ ወደ ቤት እየሄድኩ ነበር ምሽት አካባቢ እና አንድ ወንድ ተከተለኝ ወር አካባቢ ሆኖታል	1
በማንኛውም ጊዜ ሊከሰት ይችላል እና በመንገድ ላይ በሚጓዙበት ጊዜ በሁሉም ቦታ ይከሰታል	1
የወንዶች ቡድን ሴት ልጆችን ያሾፍ ነበር እና ፎቶግራፋቸውን ያነሳሉ	1
ወንዶች እና ወንዶች በሴቶች ላይ ምንም አይነት ጨዋነት የላቸውም መንገድ ላይ መሄድ ብቻ ያስፈልግዎታል እና ሁሉንም አይነት ትንኮሳ ይደርስብዎታል	1
ከሰአት በኋላ ተከሰተ	1
ይህ የተወሰነ ቀን መሆን የለበትም ምክንያቱም ወደዚያ በሄድኩ ቁጥር እራሱን የሚያድስ ልምድ ነው በሴክንደርባድ የባቡር ጣቢያ አቅራቢያ የሚገኘው የራቲፊል አውቶቡስ ጣቢያ በአውቶቡሶችበአውቶቡስ ፌርማታዎች ውስጥ የሚንከባለል ጨዋነት የጎደለው እይታ በቅርብ ለመቆም እና አስከሬኖችን ለማሸት የሚሞክርበት ቦታ ሆኖ ቆይቷል ከዚህ አውቶብስ ማቆሚያ ለ ዓመታት አውቶቡሶችን መውሰድ ነበረብኝ እና ተጎንብሼእያየሁእየተጎነጎነኝ እና እየተሻሸሁ ነው የተሻለ መብራት እና እንክብካቤ እና የፖሊስ አባላት መገኘት ሁኔታውን እንደለወጠው ተስፋ አደርጋለሁ	1
ወደ ብሃክታፑር እየተጓዝኩ ሳለ የወንዶች ቡድን ነካኝ ይህም ለእኔ በጣም አልተመቸኝም	1
ብዙ ጊዜ በዴሊ ውስጥ በሮሂኒ ዘርፍ እና በጠዋትከሰአት እና ማታ ትንኮሳ አይቻለሁ መወያየት የተለመደ ርዕስ ነው	1
በብስክሌት ተነካ	1
በተከፈተ ጂፕ ውስጥ አራት ሰዎች ጨዋነት የጎደለው አስተያየት ሰጥተዋል በሌሊት ተከሰተ	1
ወንዶች በባቡር ውስጥ ጮክ ብለው ስለ እኔ አስተያየት መስጠት ጀመሩ	1
በገበያ አውቶቡሶች ውስጥ አንድ ሰው በጣም ምቾት እንዲሰማኝ በማድረግ አስተያየቶችን እየነቀነቀ እና እያስተላለፈ ነበር አውቶብሶቹ በጣም የታሸጉ እና የተጨናነቁ ናቸው	1
በዲኤምአርሲ ምሽት ሰዎች በብስክሌት ጮክ ብለው ሲያፏጩ አለፉ ()	1
ምሽት ላይ አንዳንድ የግሮሰሪ ዕቃዎችን ለመግዛት ወደ ሱቁ እየሄድኩ ነበር አንዳንድ ወንዶች ልጆች እየተከተሉኝ ነበር እና አስተያየት እየሰጡኝ ነበር እኔ አላውቃቸውም ፍርሃት ተሰማኝ እና ሄድኩ	1
ከምሽቱ ሰዓት አካባቢ ነበር ከኮሌጅ በኋላ ወደ ሜትሪ ጣቢያ እየተመለስኩ ነበርእኔ ግን አንዳንድ የሰከሩ ወንዶች ልጆችን አገኘሁፎቶ እያነሱ እና አስተያየት እየሰጡ ነበር ብቻውን መጓዝ ደህንነቱ የተጠበቀ እንደሆነ ይሰማዋል	1
የአንዳንድ ወንዶች መጥፎ ባህሪ በሴቶች ላይ ጸያፍ አስተያየቶችን ያስተላልፋሉ	1
አንድ ሰው ጸያፍ ዘፈኖችን እየዘፈነ ነበር	1
ምሽት ላይ በሰማያዊ መስመር ሜትሮ ተከስቷል	1
የወሲብ ግብዣዎችስዕሎችን ማንሳት	1
ከኮሌጃችን ውጭ ቆመን መኪና እየጠበቅን ነበርአንዳንድ ወንዶች ልጆች መጥተው እያሳደዱን ጀመሩ	1
በቀለም ካስት ላይ የተመሰረተ ማሾፍ	1
በምሽት አስተያየት	1
እኔ በካምላ ናጋር ነበርኩከቀኑ ሰአት አካባቢ ነበርየኮሌጅ ተማሪዎች የሚመስሉ የወንዶች ቡድን በአለባበሴ ላይ ቢራ ረጨ የቻልኩትን ያህል ሸሽቼ ስለ ጉዳዩ ለጓደኞቼ ነገርኳቸው ለሚቀጥሉት ዓመታት እዚህ መማር ስላለብን ለፖሊስ ሪፖርት ማድረግ አልፈለግንም	1
በእግር ስንሄድ ጥቂት ወንዶች በሴት ጓደኞቼ ምስል ላይ አስተያየት ሲሰጡ አየሁ	1
ከጂምዬ ውጭ ብቻዬን ቆሜ ነበር ሾፌሬ ሊወስደኝ ነበረበት እና ሊወገድ በማይችል ሁኔታ ምክንያት ዘግይቷል ሹፌሬ እስኪመጣ ድረስ የሚያዩኝ የወንዶች ቡድን ያለማቋረጥ አሳደዱኝ	1
አንዲት ልጅ እያለፈች ነበር እና የወንዶች ቡድን በእሷ ደስታ ላይ አስተያየቶችን እያስተላለፉ ነበር	1
አንዲት ልጅ በፖሊስ ጥቃት ደርሶባታልይህ የሆነው በሌሊት ነው	1
አንድ ቀን ወደ ቤቴ ስመለስ ሁለት እንግዳ የሆኑ ወንዶች ልጆች ሊያናግሩኝ ሞከሩና ወዴት እንደምሄድ ጠየቁኝ ቤቴ የት አለ?	1
የተከሰተው በምሽት ነው	1
ዴሊ ሬዋሪ ማለፊያ ባቡር አስተያየት	1
ወንዶች አስተያየት እየሰጡ ነበር	1
የወንዶች ቡድን ፉጨት እየነፈሰ ከኮሌጅ ውጭ አስተያየት እየሰጠ ነበር	1
በማለዳ በሰሜን ካምፓስ አካባቢ ለእግር ጉዞ ሄድኩ እና አንድ የመኪና ሪክሾ ሹፌር ሲያየኝ ማስተርቤሽን ጀመረ	1
ሞሞስቻውሜይን የአስተያየት ዓይነቶች	1
ሰዎች ስለ መልካችን አስተያየት ሲሰጡን ፎቶ ሊያነሱን ይሞክራሉ	1
ኮሌጅ ስገባ አንዳንድ ሰዎች አይተውበፉጨት ያፏጫሉአስተያየት ሰጡኝ እና ተከተሉኝ	1
በኃይል ቤት አቅራቢያ ተከሰተሁለት ሞተር ሳይክል ነጂዎች እንግዳ እና ግርግር አስተያየቶችን በመስጠት እና በፉጨት አለፉ በሌሊት ተከሰተ	1
እስከዛሬ ደህና ነኝ ነገር ግን እንደ ወንዶች ልጆች አስተያየቶችን ለኛ ሴት ልጆች በሚያስደነግጥ ቃል ሲያሾፉ አይቻለሁ	1
ምሽት ላይ በር ላይ ሰዎች ሁል ጊዜ አስተያየት ሲሰጡ እና ሲነኩ ይገኛሉ	1
ሳልፍ ሁል ጊዜ በመካከላቸው ምልክቶችን ያደርጋሉ እና ቆንጆ ብለው ይጠሩኛል እና ይህን አልወደውም	1
እህቴ እና ጓደኛዋ በሶስት ሰዎች ተጨፍጭፈዋል ወደ ደቂቃ ያህል ያለማቋረጥ ይከተሏቸዋል	1
ሁለት ወንዶች ልጆች ሴት ልጅን ያሾፉ ነበር	1
ወደ ትምህርት ቤት እየሄድኩ ሳለ ከተሽከርካሪ ውጭ ቆመው የነበሩ የወንዶች ቡድን ትልቅ ቂጥ አለኝ	1
ወንድ ልጅ በእኔ ምስል ላይ አስተያየት ሲሰጥ	1
ወደ መስጂድ እየሄድኩ ነበር እና አንዳንድ ሰዎች ደውለው ይጮሁብኝ ጀመር ኮቱኮ ሳዋኮት ማለት ያንቺ ቆንጆ ማለት ነው	1
በአውቶቡስ ውስጥ አንድ ሰው አግባብ ባልሆነ መንገድ ነካኝ	1
ሳያስፈልግ እያየወራዳ ነገሮችን አስተያየት መስጠት	1
የድመት ጥሪዎችፉጨትአስተያየት መስጠትማሽኮርመምየፊት መግለጫዎች	1
እኩለ ቀን ላይ ትንኮሳ	1
አንድ ሰው እስከ ቤቴ ድረስ ተከተለኝ	1
ተገርሜ አስተያየት ሰጥቻለሁ	1
በትምህርት ቤቱ አቅራቢያ ተከስቷል	1
ሴት ልጅ አልፋ አስተያየት ስትሰጥ እና የማይመች መልክ ስትሰጥ ወንዶች እየጮሁ እና እየጮሁ ነበር	1
ጠዋት ላይ ስለ ሴት ልጆች ቡድን የተሳሳቱ ቃላትን አስተያየት መስጠት	1
ሰዎች በልብሴ እና በሰውነቴ ላይ አስተያየት እየሰጡ ነበር	1
ከአንድ ወንድ መቀመጫ ሲጠየቅ ያልተፈለገ አስተያየት መስጠት	1
ሴት ልጅ ከመኪና እንድትወርድ አልተፈቀደላትም ሼ እየጮኸ ሹፌሩ በፍጥነት እየነዳ ሸሸ በመኪናው ውስጥ ለመቆየት ተገድዳለች ይህ የሆነው ሚኒ ሲሾርሴክተር ቫሺ አቅራቢያ ነው	1
ሰዎች በካምላ ናጋር አካባቢ ስለ ቀሚሶች እና ነገሮች አስተያየት ይሰጣሉ ምሽት ላይ ተከስቷል	1
አንድ ጊዜ በአቅራቢያው በሚገኝ የገበያ አዳራሽ ውስጥ መንገድ ላይ ስሄድ አንድ ሰው ስለ ግል ክፍሌ መጥፎ ቃላት ሲናገር በአጠገቤ አለፈ	1
በኡታም ናጋር ተርሚናል አንዳንድ መጥፎ ወንዶች ልጆች ከዚያ አካባቢ በሚያልፉ ልጃገረዶች ላይ አስተያየት መስጠት ይጀምራሉ	1
ከጓደኞቼ ጋር በዝናብ እርጥብ ነበርኩ እና አንዳንድ ወንዶች ስለ እኛ አስተያየት ሰጥተዋል	1
ከወንዶችም ከሴቶችም ከጓደኞቼ ጋር በባንድራ ትርኢት ላይ ነበርኩ እና ይህ ሰው አህያዬን አጥብቆ ቆንጥጦታል ወደ ኋላ ስመለስ በህዝቡ መካከል ጠፋ አሁንም ማን እንደሆነ አላውቅም	1
መንገድ ላይ እየተራመድኩ ነበር እና በብስክሌት ላይ ያሉ ጥቂት ወንዶች ልጆች አስተያየት ሰጡኝ	1
ጓደኛዬ በሌይኑ ውስጥ እየሄደ ነበር እና አንድ ሰው ስም ጠርቶ ያሾፍባታል	1
ከዚህ አሰቃቂ ገጠመኝ ከ ዓመታት በፊት ከአንድ ቀን በኋላ የጻፍኩት የሚከተለው ነው ምናልባት የኔ ጥፋት ነው ምን ማለት እንደሆነ በፍፁም ማወቅ አልነበረብኝም እናም ድምፄ እየተንቀጠቀጠ በኮትማር ጃኬክት መለስኩለት እና እንደ እያንዳንዱ ሹል የቃላት ልውውጥበኋላለተወሰነ ጊዜ መስጠት የምችላቸውን የተሻሉ ምላሾች አሰብኩ ኮታ ፖሊስ ቻሌጋን ማለፍ? ወይም የጉድጓድ ሀሳቦች አሁንም በቃላት መግለጽ አልቻልኩም በድንገት የአስገድዶ መድፈር ሰለባ መሆን ምን እንደሚሰማኝ ፍንጭ ተሰጠኝ ምናልባት በድንገት በዙሪያዬ ላሉ ሰዎች እንደተጋለጥኩ ተሰማኝ ለማለት በጣም ተንኮለኛ ሊሆን ይችላል በተመሳሳይ በዙሪያዬ ባሉ ብዙ ዓይኖች ውስጥ ግዴለሽነት …	1
አንዲት ልጅ ገና ከትምህርት ቤት ትመጣ ነበር የወንድ ልጅ ቡድን መጥፎ ቃል ዓረፍተ ነገር በመናገር ያሾፍባታል ነገር ግን ምንም አይነት እርምጃ መውሰድ አልቻለችም እና ን ችላ ብላለች	1
በአውቶቡስ ውስጥ የታመመ ልጅ ጠቀሰኝ	1
የወሲብ ሱሰኞችን አውቃለሁ ከእነሱ እና ከፍላጎታቸው እና ሱሳቸው በዙሪያቸው ባሉ ሰዎች ላይ ምን እንደሚያደርግ የኛ እጅ ልምድ አለኝ በድንገት አንድ ሀሳብ ወደ እኔ መጣ አንጀት ነበረው በዚህ ደረጃ በሱሱ ውስጥ ማለቴ ነው (እኔ በጣም ማራኪ እንዳልሆንኩ በማሰብ እና ለወጣት ልጃገረዶች ይህን አይነት ነገር ብቻ ይናገራል) ምናልባት ይህን የሚያደርገው በግዴታ ነው ነገር ግን የሆነ ቦታ የጀመረ መሆን አለበት እንደዚህ አይነት ነገር ጮክ ብሎ የሚናገር ነጠላ ሰው አላውቅምበግንኙነት ውስጥም ቢሆንባለጌ ሚና ጨዋታ ምሽት ይህ ለሴት ልጅ ከማቅረብ የበለጠ ከባድ ነው ብዬ አምናለሁ ወይም ምናልባት ለእሱ ላይሆን ይችላል ምናልባት ያደገው የ…	1
በቤቴ አካባቢ በመንገድ ላይ ማፏጨት እና ማሾፍ አጋጥሞኛል	1
በሪክሾ ወደ አንድ ቦታ እየተጓዝኩ ሳለበሳንትሮ መኪና ውስጥ ያሉ አንዳንድ ሰዎች ተከተሉኝ እና እያዩ ነበር	1
ብቻዬን ገበያ እየሄድኩ ነበርአንዳንድ ወንዶች ልጆች በብስክሌት መጡ የሴት ልጅን ፎቶ አንስተው ተሳለቁባት በኋላም ሸሸች	1
እኤአ በ አመት አካባቢ ያለች ልጅ ቁምጣ ለብሳ ነበር እና በወንዶች ቡድን ያለማቋረጥ እያየችአስተያየት እየሰጠች ነበር ( አካባቢ)ለሌሎችም አስቸጋሪ ነበርከሰአት በኋላ በሰማያዊ መስመር ሜትሮ ተከስቷል	1
እህቴ እና ጓደኛዋ በሶስት ሰዎች ተሳደቡ ያለማቋረጥ ለ ደቂቃ ያህል ተከተሏቸው	1
ከሰአት በኋላ ጨዋነት የጎደለው አስተያየት ነበር	1
አንድ ወንድ ከምሽቱ ፡ ላይ በመንገድ ላይ አንዲት ልጃገረድ እየጮኸ እና አካላዊ ጥቃት እየፈፀመ ነበር ለማቆም ወደ ታች ወርጄ ጣልቃ መግባት ነበረብኝ ካላቆመ እንደምነግረው ነገረኝ በጣም የሚያስደነግጠው ነገር ሰዎች ሲከሰት እየተመለከቱ ነበር እና ማንም አላቆመውም አንድ ሰው ሁለተኛ ፎቅ ላይ ካለው ቤቱ ለፖሊስ እንደሚደውል ጮኸግን ያ ብቻ ነበር ይህ ዓይነቱ ግድየለሽነት በጣም አስፈሪ ነው!	1
አንዲት ልጅ ጠባብ መንገድ ማቋረጥ ባለባት ምሽት ድግስ ላይ ልትገኝ ነበር ነገር ግን በመንገድ ላይ ሰዎች ሲያሾፉባት እና መጥፎ ቃላትን ሲጠቀሙባት እያዩ ነበር አሁን ከቤት ለመውጣት በጣም ፈራች	1
ከኮሌጅ ሲመለሱ አንዳንድ ወንዶች ከመንገድ ተከተሉኝ	1
በእግር በሚጓዙበት ጊዜ አስተያየት መስጠት	1
አንዳንድ ሰዎች እኔ እና ጓደኛዬ በአጠገባቸው ስናልፍ ቆንጆ ነኝ አሉ	1
በገበያ ማዕከሉ ውስጥ ሰዎች አስተያየት ሲሰጡኝ እና ፎቶ ሲያነሱኝ ነበር	1
የተወሰኑ ሰዎች በመኪና ሲያልፉ ጸያፍ ምልክቶችን አደረጉእና በሜትሮ ውስጥ ያለ አንድ ሰው ፎቶ አንስቷል	1
እሷ የመንግስት ነች ባለስልጣን እና በተጨናነቀ አካባቢ ምክንያት ደህንነት የሚሰማት ጊዜዎች አሉ	1
በ ዓመቴ ብቻዬን እየመጣሁ ነበር እና አንዳንድ ወንዶች ልጆች አስተያየት ሰጡኝ እና ያፏጩኝ ነበር	1
ትንኮሳ እና መጥፎ ባህሪ	1
በአጠገቤ እያለፍኩ ነበር እና አንዳንድ ሰዎች ስለ እኔ ማውራት እና እኔን ማየት ጀመሩ	1
መንገዶቹ በጣም በረሃ ሲሆኑ ሔዋን ምሽት ላይ ታሾፍ ነበር	1
ወደ አንዱ የሳሮጅኒ ናጋር ሱቆች ሄድኩ እና አንድ ልጅ የፊት ገጽታን እያሳየ ነበር እና ክፉኛ ወቀሰው	1
ባቡር ከዴሊ ወደ ሪዋሪ አስተያየት	1
ከሰአት በኋላ ስጓዝ በእኔ ላይ የተሰጡ አስተያየቶች ነበሩ	1
አንድ የመኪና ሹፌር ተከተለኝ እና ጨዋ ያልሆኑ አስተያየቶችን ሰጠኝብዙ ሰዎች በአካባቢው ስላልነበሩእንዴት ምላሽ እንደምሰጥ እርግጠኛ አልነበርኩም እና የበለጠ እንዳይከተለኝ በፍጥነት ወደ ባይላን ገባሁ	1
በእኔ ላይ አስተያየት የሚሰጡ ወንዶች ልጆች	1
ከገበያ እየተመለስኩ ሳለ አንድ ልጅ ይከተለኝ ጀመር እና ጸያፍ አስተያየቶችን ሰጠ	1
አስተያየት ስጠኝ ምስሎቼን ወሰድኩ	1
በጎዳናዎች ላይ ሲራመዱ	1
በዚህ አካባቢ ብዙ እንግልት ይፈጸማል ልጃገረዶች ይንገላቱ እና ሰዎች በቢላ ይንከራተታሉ	1
የክፍል ጓደኛዋ ከጎረቤቶቿ መቀመጫ ጋር እንኳን እንደሄደች ነገራት	1
የፊት ገጽታዎችን በማይመች መንገድ ያለማቋረጥ እንዲመለከቱ ማድረግ እንዲሁም አካላዊ ትንኮሳ ይደርስባቸዋል	1
አላግባብ መጠቀም ቃላት	1
ይህ ክስተት በጠዋት በሴክተር ከ ወደ ኮሌጅ ስንሄድ በቡድን ውስጥ የነበሩ አንዳንድ ወንዶች ስለ እኛ አስተያየት ሰጥተዋል	1
ወደ ሻህዳራ ሜትሮ ጣቢያ እሄድ ነበር በመንገድ ላይ አንድ ሰው ማፏጨት ጀመረ እና ርካሽ አስተያየቶችን አስተላልፏል በሜትሮስ ውስጥ ሰዎች ምንም እንዳልተከሰተ ይነካሉ እና ያስመስላሉ	1
ወደ ኮሌጄ እየሄድኩ ነበር ወደ ጣቢያው እንደገባሁ ጥቂት ወንዶች ልጆች በአለባበሴ ላይ አስተያየት ሲሰጡ ሰማሁ	1
ተበሳጨ እና ችላ ተብሏል	1
ተከታይ እና አስተያየት	1
ከህንጻችን አጠገብ ባለ ኮሪደር ላይ እያለፍኩ ነበር እና እዚያ የሚያልፍ ሰውም ነበር መራመዱን አቆመ እና መንገድ እየሰጠኝ መስሎኝ ነበር ነገር ግን አጠገቤ ስደርስ እቅፍ አድርጎ አቅፎኝ ነበር ነገር ግን እምቢ አልኩኝ ደደብ እና ደደብ ነኝ ብሎ አሰደበኝ	1
ወንዶች አስተያየት ይሰጣሉ እና ሴት ልጆችን ያሳድዳሉ	1
ጓደኛዬ በአካባቢው ከሚኖሩ ሰዎች ቡድን ፊሽካ እና ጸያፍ ቋንቋ አግኝቷል	1
ጓደኛዬ ተቸገረ አንድ ሰው ከሰአት በኋላ በሞልቻንድ መንገድ ላይ አስተያየቶችን አስተላልፏል አንድ ወር ሆኖታል	1
በጣቢያው ውስጥ ደህንነት አይሰማትም	1
ምሽት ላይ ጥሪዎች እና አስተያየት	1
ከእህቴ ጋር በመንገድ ላይ ስሄድ አንዳንድ ወንዶች ልጆች ያሾፉብኝ ነበር	1
እንደ እኔ አባባል በዴሊ ውስጥ በጣም ደህንነቱ ያልተጠበቀ ቦታ ሱልጣንፑሪ ነው ሞባይል ተኳሾች ተነጠቁቢፕ የሚያዩ ልጃገረዶች ናቸው	1
በ አመሻሽ ላይ በካምላ ናጋር ገበያ ውስጥ እያለፍኩ ነበር ይህ የ አመት እድሜ ያለው ሰው በጣም ጸያፍ እና ርካሽ አስተያየቶችን በማለፍ ሲያልፍ በጣም አሳፋሪ ነበርአይሮአፔድ አይነት ተሰማኝ	1
አንድ ቀን ትምህርት ቤት ስሄድ የወንዶች ቡድን አየሁ እናም ያፏጩኝ ጀመር እና መልስ ሳልሰጥ ተሳደቡኝ	1
ወደ አሻንጉሊት ገበያ ስሄድ አንድ ሰው ትልቅ ቡም አለኝ እያለ ይሰድበኝ ጀመር እና የተናገረውን ስላልገባኝ ደነገጥኩ እና አሳፋሪ ነው	1
ወደ ሥራ ስሄድ ወይም ወደ ኮሌጅ ስሄድ ሰዎች እንደ ቻይንኛቺንኪስወዘተ ያሉ አስተያየቶችን ያስተላልፉ ነበር	1
ምስሎች ተወስደዋል እና አስተያየቶች ተላልፈዋል	1
በአውቶቡስ ውስጥ	1
በጠዋት ወደ ላሊት በመንገዱ ላይ እየሄድኩ ሳለ ከተቃራኒ አቅጣጫ የሚመጣ መኪና ውስጥ ያለ ሰው ፍጥነቱን ቀዝቅዞ መስኮቱን አውርዶ ኮትማስት ላግ ራሂ ሃይኮት (የቁም ነገር የሚመስል) በጣም ጸያፍ በሆነ መልኩ ጮኸ	1
አንድ ቀን እንደ አጎት የማከብራቸውን አንድ አዛውንት በአንድ ሬስቶራንት ውስጥ ለማግኘት ሄድኩ እና በዚያን ጊዜ ማንም በሌለበት ጊዜ ሊስመኝ እና የግል ክፍሎቼን ሊነካው ሞከረ እንደ ህዝባዊ ቦታ እና ለእሱ አክብሮት መስጠት ስላልቻልኩ ከዚያ በፍጥነት ተሰማኝ	1
ከሰአት በኋላ ትንኮሳ	1
አንድ ወንድ አንዲት ሴት በአካባቢው ባቡር ላይ ስትሄድ ተጓዥ የሆነው ሰው በአካባቢው ባቡር ውስጥ ነበር ሲል አስተያየቱን ሰጥቷል	1
ጥቂት ወንዶች ያፏጫሉ እና አጭር ቀሚስ የለበሱ ልጃገረዶችን ይከተሉ ነበር	1
ከሴት ጓደኛዬ ጋር ወደ ሰርጉ እየሄድኩ ነበር እና በጣም ጥሩ ልብሶችን ለብሰናል እና በአውቶቡስ ፌርማታ ላይ አንዳንድ ሰዎች እሷን ስከላከል የሚደበድቡኝን ልብሷን ሊያነሱ ሞከሩ እነሱ የግል ክፍሎቿን ነካው	1
ጠዋት ትንኮሳ	1
የተጓዝኩበት ምሽት ላይ ነበር እና የተለያዩ የድመት ጥሪዎችፉጨት እና አስተያየቶች ተደርገዋል () የተከሰተው በሜትሮ እና በከተማችን ውስጥ ነው	1
ምሽቱ ነበር እና ወደ ኮሌጅ እየተመለስኩ ነበር እና በድንገት አንድ ቫን ከጎኔ ቆመ እና አስተያየቶችን ማለፍ ጀመሩ ፍጥነቴን አዘጋጅቼ ወደ ኮሌጁ በር እጣደፋለሁ	1
አንዲት ሴት አውቶቡስ ውስጥ አጠገቧ ተቀምጦ የነበረ ሰው አግባብ ባልሆነ መንገድ ነክቶት ምላሽ ስትሰጥ ከአውቶቡሱ ተወርውሮ ወደ ፖሊስ ጣቢያ ተላከ	1
ይህ ክስተት ከሰአት በኋላ በሜትሮሰማያዊ መስመር ውስጥ ተከስቷል ከሴቶች ክፍል አጠገብ ባለው ክፍል ውስጥ ያሉ እንግዶች እያዩ እና አስተያየት እየሰጡ ነበር	1
ሪክሾ ውስጥ ነበርኩ በድንገት ሁለት ወንዶች ልጆች በብስክሌት ይከተሉኝ ጀመሩ እና ያፏጫሉ እና ርካሽ አስተያየቶችን ያስተላልፋሉ	1
ከጃንግፑራ ሜትሮ ጣቢያ ወደ ኋላ እየተመለስኩ ነበር እና አንድ ፖሊስ (የጋራ ህዝብ ጠባቂዎች እየተባለ የሚጠራው) ርካሽ አስተያየቶችን አሳልፏል ልጃገረዶች በዕለት ተዕለት ሕይወታቸው ውስጥ ማየት እና ዋዜማ ማሾፍ የተለመደ ነው	1
ሁለት ወጣት ወንዶች ልጆች ከአንድ አዛውንት ጋር በ ሴት ልጆች ላይ መጥፎ አስተያየት እየሰጡ ነበር	1
ከትምህርት ቤት ስመጣ ዘፈን እየዘፈነ ነበር ያ እንደገና አታድርገው አልኩ እሺ በቤቴ አቅራቢያ ሆነ	1
ከህንጻዬ ወጣሁ እና ይህ ሰው የሆነ ነገር በሹክሹክታ ተናገረኝ እና እንዳለፈኝ ሳውቅ በመንገዴ ላይ ቆምኩ እና ዞር አልኩ እና ምላሽ ለማግኘት ወደ ኋላ እየፈለገ ነበር ቀኔን እንዲያበላሽ አልፈቀድኩም	1
በሜትሮ ውስጥ ሲጓዙ ጸያፍ አስተያየቶችን ተቀብለዋል	1
በአካባቢው በተጨናነቀ ባቡር ውስጥ ነበርኩ እና አንድ ሰው በጉዞው ሁሉ ይነካኝ ነበር እና በመጨረሻው ጣቢያ ላይ ስንወርድ በጆሮዬ ላይ አስተያየት በሹክሹክታ ተናገረ እና ሄደ	1
የምስል አምፕ አስተያየት መስጠት	1
ጓደኛዬ በታዋቂው ኩባንያ ውስጥ በራሷ አለቃ ትንኮሳ ደረሰባት ያለሷ ፈቃድ በኃይል ሳማት	1
በአጠገቡ ስላለፈችው ልጅ ሁሉ አስተያየት የሚሰጡ የወንዶች ቡድን ቆመው ነበር	1
በዲሲ ከሴቶቹ ጋር ልገናኝ በመንገዴ ላይ ነበር በአውቶቡስ ፌርማታ ላይ ስወርድ በመንገድ ዳር የተቀመጡ ብዙ ወንዶች አንዲት ሴት እንድትቀበል ጋበዙዋቸው ሴትየዋ ችላ ስትል ስድብ ጀመሩ	1
ጸያፍ የፊት ገጽታ	1
ማሳደድ እና አስተያየት መስጠት	1
እኔና ጓደኞቼ ከራጃኒ ጋር ወደ ትምህርት ቤት እየተጓዝን ሳለ ምሰሶቹ ላይ የተቀመጡ የወንዶች ቡድን እየደወሉን እና እየሳቅን በአለባበሳችን ሁነታ ላይ ማሾፍ ጀመሩበጣም መጥፎ ስሜት ተሰማን	1
አስተያየት መስጠትመንካት መጥፎ የፊት መግለጫዎች (ዲቲሲ አውቶቡስ ቁጥር )	1
ወደዚያ ስለተዛወርን እና በአቅራቢያው ባለው ሱቅ ውስጥ አንዳንድ እቃዎችን ላገኝ ስሄድ ለቦታው አዲስ ነበርኩ በመድኃኒት ባለሙያ ተሳለቅኩ እና አስተያየት ሰጠኝ በጣም ፈርቼ ወንድሜን ደወልኩ እና ያንን መድሃኒት አስጠነቀቀ	1
ወደ ቤቴ እየተመለስኩ ሳለ በብስክሌት ወደ እኔ የሚመጣ ሰው ጡቴን ነክቶ ሄደ በዚያን ጊዜ በጣም ፈርቼ አፍሬ ነበር	1
በትምህርት ቤቴ ካርኒቫል ጥቂት ወንዶች ሊደበድቡኝ የሞከሩ ነበሩምንም እንኳን በዙሪያው ሴቶች የሆኑ እና ያልተነሱ አስተማሪዎች ቢኖሩም ወንድ ጓደኞቼ ግን ቆሙልኝ ከመካከላቸው አንዱ ሊደበደብ ተቃርቦ ነበር ነገር ግን እነዚያ ሰዎች ግቢውን ለቀው መውጣታቸውን አረጋግጧል	1
ጥቂት ወንዶች ስለ ሴት ልጅ እያሾፉ እና አስተያየት እየሰጡ ነበር	1
በአሥራዎቹ ዕድሜ ውስጥ የምትገኝ ልጃገረድ ወደ ሜትሮ ጣቢያ እየሄደች ነበር አንድ መኪና አጠገቧ ተንከራተተ እና ውስጥ የተቀመጡት ልጆች መስኮቱን ከፍተው በጣም በሚያሳዝን ሁኔታ ወደ እሷ ተመለከቱ ከዚያም የጥቅስ ጎኮት አለ	1
ከፊት ለፊቴ ስሄድ የወንዶች ቡድን አበባ ወረወሩብኝ እና ጨዋነት የጎደለው አስተያየት ሰጡ	1
ከሰአት በኋላ ስወጣ ልጆቹ አስተያየት እየሰጡ ነበር ከሰአት በኋላ ተከስቷል ለፖሊስ ሪፖርት አድርጌ ነበር ነገር ግን ምንም ምላሽ አልነበረም (	1
ሰዎች በአጠገቤ ስሄድ ስለ እኔ አስተያየት ይሰጡ ነበር	1
በአካባቢው አውቶቡስ ውስጥ ነበርኩ ልጅ ሆዴን ሊነካው ሞከረ እና ጮህኩት	1
በምስራቅ አንድሄሪ ኮሌጅ ስሄድ የወንዶች ቡድን ተቀምጠው ያፏጩኝ ነበር	1
ይህ ክስተት የተከሰተው ምሽት ላይ ከጓደኞቼ ጋር ስዞር ነበር	1
በማለዳከእናቴ ጋር ለመገበያየት ወደዚያ ሄድኩ (በወንዶቹ በቆሸሸ ስም እየተጠራሁ ነበር)	1
አስተያየት መስጠትድመት ጥሪዎችሰንሰለት መያያዝ	1
ዴሊ ደህና ስላልሆነ ትንኮሳ በሁሉም ቦታ ይከናወናል ምሽት ላይ ይከሰታል	1
ከቢሮአቸው ስለመጡ ልጃገረዶች አምፕ ፎቶግራፍ ማንሳት አስተያየት መስጠት	1
ይህ ክስተት የተከሰተው ከ ወር ባነሰ ጊዜ ውስጥ ምሽት ላይ በሜትሮ ጣቢያ ውስጥ ነው በሜትሮ ውስጥ ያለ አንድ ሰው በአጋጣሚ እንደመታ በመምሰል የግል ክፍሎችን ለመንካት ሞክሯል	1
ሰዎች ስለ እኔ ጸያፍ ንግግር አድርገዋል	1
የማይታገስ	1
ድመት ጥሪዎችፉጨትፎቶ ማንሳትአስተያየት መስጠት እና ሌሎች ጨዋነት የጎደላቸው ተግባራት	1
የመኪና ሰው በመኪና ውስጥ ብቻዬን መሆኔን አይቶ የተሳሳተ መንገድ ወሰደ (አቋራጭ ነው እያለ) በኋላ ስጮህ እና ፖሊስ እደውላለሁ አልኩት በትክክለኛው መንገድ ወሰደ	1
ወደ መኪናዬ መሄድ ስላልቻልኩ መንገዱን ዘጉት	1
በጋራ መኪና ውስጥ ነበርኩ የመጨረሻው ፌርማታ እኔ ብቻ እና አንድ ወንድ ቀረሁ በድንገት የግል ጥያቄዎችን ጠየቀኝ እና መሳምህ እችላለሁ? ምላሽ ከመስጠቴ በፊት ሸሸ	1
በምሽት ጊዜ በተማረ ሰው በአውቶቡስ ላይ የሚደርስ አካላዊ ጥቃት	1
አንዳንድ ወንዶች (ጨካኝ) በመንገድ ላይ መጥተው ስለ ሴት ልጅ በአሰቃቂ ሁኔታ አስተያየት መስጠት ሲጀምሩ ከጓደኞቻቸው ጋር የተለመደ ምሽት ነበር	1
ይህ ክስተት የተከሰተው ምሽት ላይ በራጂቭ ቾክ ሜትሮ ጣቢያ ነው በአብዛኛው የተከሰተው ሜትሮ ጣቢያው ሲደርስ ነውአብዛኞቹ ሰዎች ያንን እንቅስቃሴ አላግባብ ይጠቀማሉ እና የግል ክፍሎችን ይነካሉ	1
አልፌ ነበር እና አንዳንድ ሰዎች ደውለውኝ ቆንጆ ንገሩኝ	1
በሕዝብ አውቶቡስ ውስጥ አንድ ሰው ሲያሾፍ እና ከሴትየዋ ጋር ለመቀራረብ ሲሞክር አየሁ	1
ምሽት ላይ በካሽሜሬ በር ሜትሮ ጣቢያ ላይ አስተያየት መስጠት እና መንካት	1
ቀጣይነት ያለው እይታ እና ለመቅረብ እና ለመንካት መሞከር	1
ወንዶች ልጆች ስለ እኔ አስተያየት ሲሰጡ ተረብሸኝ ነበር	1
በቼናይ ውስጥ የተጨናነቁ አውቶቡሶች ወንድ አሳፋሪ ነገሮችን ለመያዝ እና ለመስራት ይሞክራል እና ሴቶች እንደ መደበኛ የዕለት ተዕለት ነገሮች ያደርጉታል በቋንቋ ችግር ምክንያት ስትጋፈጣቸው ያልተረዱ ያስመስላሉ ማንም አይቆምምይህ በቼናይ ውስጥ ባሉ ሁሉም የህዝብ ማመላለሻ አውቶቡሶች ላይ ነው	1
በሕዝብ መኪና ውስጥ አካላዊ ጥቃት	1
የወንዶች ቡድን በፉጨት አፏጩኝ እና መጥፎ ቃላት ነገሩኝ	1
ከጥቂት ቀናት በፊትበመንገድ ላይ ብቻዬን ስሄድጥቂት ሰዎች እያዩኝ በፉጨት ዘፈን እየዘፈኑልኝ ጀመሩ	1
እኔና ጓደኛዬ ከኮሌጅ እየተመለስን ሳለ አንዳንድ ሰዎች መጥፎ አስተያየቶችን እና ምልክቶችን ተጠቅመዋል	1
በአውቶቡስ ውስጥ አንድ አዛውንት ከኋላዬ ቆመው በእኔ ላይ እራሱን ለማሸት እየሞከሩ ነበር	1
ኮሌጅ ሲመጣ በአውቶቡስ ላይ ተከስቷል	1
እሁድ እለት በሲዲ () ውስጥ ከሁለት ጓደኞቼ ጋር ነበርኩአንደኛው የሁለት ዘር ዝርያ ነው እኛን ያለፉ ሰዎች ሁሉ ማለት ይቻላል እንደ ሂ እህትወዴት ትሄዳለህበጣም ቆንጆ ትመስላለህ ያለ ነገር መናገር ነበረባቸውእና በተለይ በጓደኛዬ ላይ ተመርተው ነበርእሱም በተለይ በማሳይ ገበያ ውስጥ ሰዎች በእሷ ላይ ምን ያህል ንክኪ እንዳላቸው አለመመቸት ተሰምቷቸዋል በሲዲ ማየት ለምጃለሁ ነገር ግን በመንገድ ላይ ባሉ ሁሉም ሰው ማለት ይቻላል ማለፍ ያን ያህል ምቾት ተሰምቶኝ አያውቅም እና ሁለታችንም በጣም እፎይታ አግኝተናል እና ታክሲ ውስጥ ገብተን ወደ ቤት ስለሄድን እናመሰግናለን በጣም ደህንነት እንደተሰማኝ እና ጓደኞቼም እንዳደረጉ አው…	1
በአውቶቡስ ውስጥ ስጓዝ አንዳንድ ወንዶች አስተያየት ሰጡኝ እና ፎቶዬን አነሱ	1
ከሰአት በኋላ ከራምጃስ ኮሌጅ ውጭ ሆነ አንድ ሰው የሆነ ነገር ስትናገር ጓደኛዬን ለመቅዳት ሞከረ እና ከዚያም አንዳንድ ፊቶችን ሠራ	1
የወጣት ወንዶች ቡድን አስተያየቶችን ያስተላልፋሉ	1
በአንድ ባለ ሱቅ አስተያየት ሰጠኝ	1
በመንገድ ላይ ስሄድ አንድ ሰው አልፎኝ ሄዶ በድንገት ጡቴን ጨመቀ በህይወቴ እንደዚህ አይነት ጥሰት እና ጥላቻ ተሰምቶኝ አያውቅም ይህ በፉጨትበመጮህ እና በመንካት የጀርባዬን መጭመቅ ከሚደርስባቸው የየቀኑ ወሲባዊ ትንኮሳ ውጭ ነው	1
ወደ ቤቴ እየሄድኩ ነበር የወንዶች ቡድን ከሜትሮ ጣቢያው በአንዱ በኩል ቆመው ነበር በአጠገቡ ስላለፈችው ልጅ ሁሉ አስተያየት እየሰጡ ነበር	1
በእኔ ላይ የሚታዩ መጥፎ የፊት ገጽታዎች አጋጥመውታል	1
አንዲት ልጅ በአውቶቡስ ጣቢያው ላይ ቆማ ነበርጥቂት ወንዶች ወደ እሷ ለመቅረብ እና እሷን ለመንካት ሲሞክሩ () እንዲያውም ስለ እሷ አንዳንድ አስተያየቶችን ያስተላልፉ ነበር ( ልጅቷ ገሰጸችውእና ሰዎቹ እንደዚህ አይነት ባህሪ ማሳየት አቆሙ ( ከሰአት በኋላ ተከስቷል	1
ከታናሽ ወንድሜ ጋር ወደ ዓይን ሆስፒታል ስሄድ ወደ ሆስፒታል ስንሄድ ሰዎች በመዘመርና በማሾፍ ያሾፉብን ነበር	1
የአውቶቡሱ መሪ እኛ የሴቶች ቡድን የተጓዝን ነበርን እስከ ክሪሽና ቤተመቅደስ ፓታን ድረስ ተከተልን	1
የ ን ለሚጎበኙ የውጭ ቱሪስቶች አስተያየት ተላልፏል	1
አንዳንድ ዕቃዎችን ለመግዛት በአቅራቢያው ወደሚገኝ ሱቅ እየሄድኩ ሳለበመንገድ ላይ ያሉ ሁለት ሰዎች ርካሽ አስተያየቶችን ማለፍ ጀመሩ እና የቆሸሸ መልክ ሰጡ በሚያዝያ ወር የሆነ ቦታ ሆነ	1
በጂአይፒ ኖይዳ ውስጥ ስዞር አስተያየት ተሰጥቶኝ ነበር	1
መስረቅአስተያየት መስጠትመጎተት	1
የመኪና ሪክሻ ሹፌር ጓደኛው በመንገድ ላይ ልጃገረዶችን ሲያንገላታ ነበር	1
ወደ ቤት ስሄድ ጥቂት የአካባቢው ሰዎች በሻይ ሱቅ ላይ ተሳለቁብኝ	1
በአውቶቡስ ፌርማታ ውስጥ አውቶቡስ እየጠበቅኩ ሳለ አንድ ሰው አጠገቤ መጣ ከእርሱ ጋር አደረ ለ ደቂቃ እንኳን ተከተለኝ	1
በትሪሙርቲ ሴቫ ሳንግ ቻውል ላይ አስተያየቶች ተላልፈውብኛል	1
እኔና ጓደኛዬ (ሴት ልጄ) በእግር ስንሄድ ጥቂት ሰካራሞች አስተያየት ሰጡ እና ለመቅረብ ሞከሩ	1
አንዳንድ ወንዶች ምሽት ላይ አውቶሪክሾዎችን በሚፈልጉ ሴቶች ላይ አስተያየቶችን ማስተላለፍ ያስደስታቸዋል	1
ከትምህርት ቤት ወደ ቤት ስሄድ አክሮስ መጣሁ በመንገድ ዳር ተቀምጬ ሁሉም ሲደውሉልኝ እና እንዴት እንደምመስል ሲናገሩ ነገሩኝ አልወደድኩትም	1
ምሽት ላይ ከፕራጋቲ ማይዳን ሜትሮ ጣቢያ ውጭ የሚደረጉ ጥሪዎችአስተያየቶች እና ንግግሮች	1
ጋዜጠኛ ሆኜ አንድ ምሽት ከቢሮዬ ወደ ቤት እየተጓዝኩ ነበር ብስክሌቴን ስጋልብ ሁለት ሰዎች ይከተሉኝ ጀመር ቤት እስክደርስ ድረስ ተከተሉኝ ጨዋነት በጎደለው መልኩ አስተያየት ይሰጡኝ ነበር	1
ስኩቲ እየጋልብኩ ሳለ በሶስት የተለያዩ ብስክሌቶች ላይ ያሉ ሶስት ወንዶች ልጆች ያሾፉኝ ነበር እና ወደ እኔ ሊመጡ እየሞከሩ ነበር	1
ይህ በደህንነት (ቀይ ዶት ፋውንዴሽን) ከደህንነት ኦዲት ጋር በሙምባይ የመንገድ ገበያዎች የተደረገ ጥናት ነው	1
ከትምህርት ቤት ስመለስ አንዳንድ ወንዶች አስተያየት እየሰጡኝ ሊነኩኝ እየሞከሩ ነበር	1
በኦሎምፒክ መንገድ እየተራመድኩ ሳለ ሲዲ በሚሸጡበት በር አጠገብ ተቀምጠውከፍ ብለው እና ከተመለከቱ በኋላ የሚንኮታኮቱ አንዳንድ ወንዶች ልጆችን አለፍኩ ባይስ እዚያ ተቀምጠው የሚያልፉ ልጃገረዶችን ይመለከቱ እና አስተያየት ይሰጣሉ አስተያየት ከተሰጣቸው ልጃገረዶች መካከል ነበርኩ	1
ተጎጂዎቹ ከቤት ውጭ የሚጫወቱ ትናንሽ ልጆች ነበሩ () የቅኝ ግዛት በሮች ጥበቃ ያልተደረገላቸው ስለነበሩ ያልተገደበ አጥፊዎች መጥተው አስተያየት እየሰጡ ነበር ምሽት ላይ ከምሽቱ ሰዓት አካባቢ ተካሄደ	1
ይህ የሆነው በፕሬት ቪሃር ሜትሮ ጣቢያ አቅራቢያ ነውሜ እና ጓደኛዬ እየተራመዱ ሳለ በብስክሌት ላይ ያሉ ሶስት ወንዶች ልጆች በጣም ቀርበው ከኋላ መቱን	1
ይህ የሆነው በሙኒርካ አቅራቢያ ባለው አውቶቡስ ውስጥ ጥቂት ሰዎች በአለባበሴ ኮድ ላይ አስተያየት ሲሰጡ ነው	1
አንዳንድ ወንዶች ቁምጣ በለበሱ ልጃገረዶች ላይ አስተያየት ሲሰጡ እና ያፏጫሉ ምሽት ላይ ሆነ	1
በዲቲሲ አውቶቡስ (ባዳርፑር) በሴፕቴምበር ላይ የአምፕ ኦግሊንግየፊት አገላለጾችን አስተያየት መስጠት	1
በምሽት ሰውነቴ ላይ አስተያየት መስጠት	1
አንድ ሰው ተከተለኝ እና እያፏጨ መጥፎ ቃል ነገረኝ	1
ጮክ ያሉ ርካሽ ዘፈኖችን ሲዘምር አንድ ሰው እኩለ ሌሊት ላይ የወሲብ ግብዣ ሲያደርግልን ተገኘ	1
መንገዱን እያቋረጥኩ ሳለሁ ተሳለቅኩኝ እና አንድ ሰው ተከተለኝ እና እሱ ደግሞ ሊነካኝ እየሞከረ ነበር	1
ከስራ ወደ ቤት እየተመለስኩ ሳለ የወንዶች ቡድን በእኔበባህሪዬ እና በልብሴ ላይ አሰቃቂ አስተያየቶችን መስጠት ሲጀምር እንዴት ምላሽ እንደምሰጥ አላውቅም ነበር እኔ ያገባች ሴት ነኝ እና ምንም ብናገር በህብረተሰባችን ውስጥ ያሉ ሰዎች ወቀሱኝ ነበር ይህ የሆነው በካሊ ማታ ማንዲር አካባቢ ነው	1
በሌሊት አስተያየት መስጠት ማጉረምረም እና ጥሪዎች	1
ወደ ትምህርት ቤት ስሄድ አንዳንድ ወንዶች ብዙውን ጊዜ አስተያየት ሲሰጡኝ እና ሲያፏጩኝ በጣም ምቾት ተሰማኝ	1
በሌሊት ከቤቴ እየተመለስኩ ነበርሁለት ሰክረው (ሰከሩ) ወደ እኔ መጥተው መንካት ሲጀምሩበወንድ ጓደኛዬ ረድቶኛል	1
ይህ በጣም ብዙ ጊዜ ተከስቷል እናም አመሻሹ ላይ ከጓደኛዬ ጋር እየተራመድኩ ነበር እና ወንዶች ልጆች በብስክሌት እየጮሁብን ነበር	1
በሲዮን የምኖር የ አመት ኮሌጅ የገባች ልጅ ነኝ በጣም አስቸጋሪ እና አስፈሪ ጉዳይ በየቀኑ ማለት ይቻላል በቀን ውስጥ በማንኛውም ጊዜ በጣም አደገኛው ቦታ ከመሬት በታች ድልድይ (የምድር ውስጥ ባቡር) ካለበት ጣቢያ ውጭ ነው ብዙ ጊዜ በዚህ ጨለማ ከመሬት በታች ምንም ብርሃን የለም ከዚህ በተጨማሪ ከመሬት በታች ካለው ድልድይ ከወጡ በኋላ እና ወደ ሺቫር የእንግዳ ማረፊያ ቤት ሲሄዱ ሁል ጊዜ ግዙፍ የወንዶች ቡድን አሉ የሱቅ ጠባቂዎችን ጨምሮ በጅምላ ልብስ መሸጫ ሱቆች አጠገብ ተቀምጠው ወደ ቢኤምሲ ኳተርስ የሚሄዱ ሴሰኛ አስተያየቶችን ብቻ ሳይሆን ወሲባዊ አስተያየቶችን ይሰጣሉ እና አንዳንድ ጊዜ ያልተፈለገ ግንኙነትን ይሞክራሉ የ…	1
በብስክሌት ላይ ያሉ ጥቂት ሰዎች ጨካኝ አስተያየቶችን በማለፍ ወደ ጓደኛዬ ለመቅረብ ሞክረዋል ምሽት ላይ ሆነ	1
አንድ ሰው አጭር ልብስ ለብሼ ነበርበጣም ፈርቼ ነበር እናም የሆነውን ማመን አቃተኝ እያለ ሙቅ ውሃ ወረወረኝ	1
ከጥቂት አመታት በፊትአንድ ምሽት ከጠዋቱ ሰዓት ላይከአውቶቡስ ፌርማታወደ ቤቷ እየሄደች ነበር ከእነዚያ ድንግዝግዝ መንገዶች አንዱ ነበር እየተራመድኩ ሳለ ወደ ኋላ ተመለከትኩኝ እና እነዚህ ሰካራሞች ሲያፏጩ እና ስሜን እየጠራሁ አየሁ በቻልኩት ፍጥነት ተጓዝኩታክሲ ተሳፈርኩ እና ቤት ደረስኩ ተሰባብረኝተበሳጨሁልደበድባቸው ፈልጌ ነበር ግን ሁላችንም ብቻዬን እንደሆንኩ አልቻልኩም	1
አንድ ሰው በሴት ልጅ ላይ አስተያየት መስጠት እና ፊቶችን ማድረግ ጀመረ	1
ሰዎች በ ብስክሌቶች ( በ ብስክሌት) እኔን እና ጓደኛዬን አይተው በጣም መጥፎ ነገር ተናግረው እየጮሁ እና አስተያየት እየሰጡን ነበር ቦታውን በደንብ አላውቅም እና እንደገና ወደዚያ መሄድ አልፈልግም ነገር ግን የባታ ሱቅ እና እዚያ ነበር በአካባቢው ቆሻሻ ምስሎች ያለው ሲኒማ	1
የወንዶች ቡድን አስተያየት ሰጥተው ወደ ገበያ ማእከል ስንሄድ ያሾፉን ጀመርን ምንም ትኩረት አልሰጠንም እና የራሳችንን መንገድ አልያዝንም	1
አንዲት ወጣት ልጅ አውቶቡስ ውስጥ እየገባች ነበር እና መሪው ወገቧ ላይ ሊነካት እየሞከረ እና አስተያየት ሲሰጥዮኮት ወደ ቦታዬ እንዲሄድ በማድረግ እግዚአብሔር ጊዜ አሳልፏል	1
አስተያየት መስጠት እና ማፏጨት	1
አንዳንድ ወንዶች ከምሽቱ ሰዓት ላይ በኮሌጅ ሴት ልጆች ላይ ይመጡ ነበር	1
በምሽት ሰአታት ውስጥየአንድ ሰው አስተያየትየፊት ገጽታእይታ እና የድመት ጥሪዎች ርዕሰ ጉዳይ ነበርኩ	1
ወንዶች ልጆች ከኋላዬ አስተያየት ሲሰጡኝ አንድ ላይ የወንዶች ቡድን በእኔ ላይ አስተያየት ይሰጣሉ	1
በዲቲሲ አውቶቡሶች ውስጥ እየተጓዝኩ ሳለበየቀኑ ማለት ይቻላል ትንኮሳ ይደርስብኛል ሰዎች እርስዎን ለመንካት ይሞክራሉአስተያየቶችን ያስተላልፋሉ እና ምንም አካል ለእርስዎ አይቆምም	1
ከገበያ ወደ ቤት ስንመለስ ሁለት ብስክሌት የለበሱ ወንዶች ልጆች ይከተሉኝ ጀመር	1
ምሽት ላይ ከሳትያ ወደ ማትሬይ ስሄድ ያጋጠመኝ የተለያዩ አዋራጅ ባህሪ	1
አንዲት ልጅ በመንገድ ላይ ስትንቀሳቀስ አንዳንድ ሰዎች ሲያስጨንቋት ነበር	1
ከሰአት በኋላ ወደ ዘመዴ ቦታ እየሄድኩ ነበር አንድ ሰው ይከተለኝ ጀመርዘፈኖችን እያጉረመረመ እና በልብሴ ላይ አስተያየት እየሰጠ ነበር መሮጥ ጀመርኩና ሊያጣው በየመንገዱ ሄድኩ	1
ከአሰልጣኝነት እየተመለስኩ ሳለ አንድ የመኪና ሹፌር እስከ ቤት ድረስ አሳደደኝ	1
በእግር ስሄድ አንዳንድ ሰዎች አስተያየቶችን አስተላልፈዋል	1
ብዙውን ጊዜ የሱቅ ሰራተኞች ወይም ባለቤቶች አስተያየት ይሰጣሉ እና በአብዛኛው እነዚህ ክስተቶች በምሽት ይከሰታሉ	1
ይህ የሆነው በ በኮላባ ነው ከጓደኞቼ ጋር ለመገናኘት ወደ ታጅ ቤተ መንግስት እየሄድኩ ነበር ቁምጣ ለብሼ ነበር እና ስፓጌቲስታፕድ ከላይ (አለባበስ ጠቃሚ አይደለም ነገር ግን ማህበራዊ ኮንዲሽነር ለምን እንደተለይኩ እንዳስብ አድርጎኛል) አንድ ሰው አስቁሞኝ በስልኩ እርዳታ ጠየቀ በረዶ ነበር ባትሪውን እንዲያወጣ ነገርኩት እና ወደ ታጅ ገባሁ በግምት ከአንድ ሰአት በኋላየመታጠቢያ ክፍሉን መጠቀም ስላለብኝ ካፌ ሞንዴጋር ነበርኩ እጥበት ክፍል ስደርስ ያው ሰው ከወንድ ኪዩቢክል ወጣ ሰላም ታስታውሰኛለህ? እኔ ስልኩ ሰው ፒሶፍየጠፋ መልክዬን ሰጠሁት እና ወደ ማጠቢያ ክፍል ውስጥ ገባሁ በሩን ይዞ ማውራት እንደሚፈልግ ተናገረ ገፋሁት…	1
ከቀኑ ሰዓት አካባቢ ወደ አክስቴ ቤት እየሄድኩ ነበር እና አንድ ወንድ እኔን ማሳደድ ጀመረ እና የብልግና አስተያየቶችን እያስተላለፈ ነበር መኪና ወስጄ ወዲያው ወጣሁ	1
በሞቲላል ኔህሩ ኮሌጅ ውስጥ ተከስቷል	1
ጠዋት እና ማታ ላይ ትንኮሳ	1
ከእነዚህ ቁጥሮች በየቀኑ የስልክ ጥሪዎችን እያገኘሁ ነው የአንድ ሰአትህን ያህል እየጠየቁኝ ነው?እባክዎ አንድ ነገር ያድርጉ እና ይህን ከንቱ ነገር ያቁሙ	1
እኔ ወንድ ነኝ በኛ ክፍል ተምሬ አስተያየት አግኝቻለሁእያፏጨእያሳደድኩ ነው	1
ይህ ክስተት የተከሰተው ከሰአት በኋላ ከቀኑ ፡ አካባቢ ነው በሜትሮ ቀይ መስመር ውስጥ ነበርኩኢንደርሎክ እና አስተያየት እየተሰጠኝ ነበር	1
የ አመት እድሜ ያለው ሰው ሱቅ ሳልፍ አስተያየት ሰጠኝ	1
በመምህሬ ደፈርኩ	1
ተከሳሹ የተጎጂውን ጌጣጌጥ ነጥቆ ጨዋነት የጎደለው አስተያየት ሰጥቷል	1
ወደ ሆስቴሌ ገጽ (ገጽ () ስመለስኮታ ቺንኪኮት እና ኮታማልኮት () አስተያየት የሰጡ ሰዎችን አገኘሁ ማየታቸውን እንኳን ማቆም አልቻሉም ( እነዚህ ክስተቶች ከባድ ስላልሆኑ እና አገልግሎታቸውን ስለማያምኑ ለፖሊስ ቅሬታ አላቀረብኩም (እኤአ)	1
መንገድ ላይ ስሄድ የተከተሉኝ እና ጸያፍ ቃላት የሰጡኝ የወንዶች ቡድን ነበሩ	1
ወይም	1
እኔና ጓደኛዬ በሌሊት በዋናው መንገድ ላይ ወደ ውጭ እየተንከራተትን ነበር (በእግር ጉዞ ብቻ) እና ሪክሾ ዋላህን ማየት የቻልክ ያህል ነበርሲያዩን አስተያየት ሲሰጡብን ነበር	1
አንድ ሰው መጀመሪያ አስተያየት ከሰጠ በኋላ ነክቶኝ ነካኝ	1
አንድ ሰው ከቂርቲ ናጋር ሜትሮ ላይ ወርዶ አጠገቤ ተቀመጠበድንገት ወደ እኔ እና ወደ ጓደኛዬ እያየ ዘፈኖችን መዘመር ጀመረ እና ከዚያ ጋር ለመነጋገር ምክንያቶችን መፈለግ ጀመረ የሚቀጥሉትን የሜትሮ ጣቢያዎችን ስማችንን ወዘተ ከዚያም ከሜትሮ ከመውጣቱ በፊት ስሙን ጠርቶ በልብሳችን ላይ አስተያየት ሰጥቷል ሆን ብሎም ወደ እኛ ይጋጭ ነበር	1
አንድ ሰው በመጀመሪያ አስተያየት ሰጠኝ ከዚያም ሊነካኝ ሞከረ	1
ከምሽቱ ፡ አካባቢ አንዳንድ ፎቶ ኮፒዎችን ለማግኘት በአካባቢው ነበርኩ እና ብዙ ወንዶች ያፏጫሉ እና ጸያፍ ምልክቶችን ያደርጉ ነበር	1
አንዳንድ ወንዶች ስለ እኔ አስተያየት ሰጥተዋል	1
እስከመጨረሻው አስተያየት እየሰጡ ከገበያ ወደ ቤት ተከተሉን	1
ወደ ባባ ዶጎ ክሊኒክ ስሄድ በመንገድ ዳር ተቀምጠው እቃቸውን እየጨመቁ ይገኛሉ እስኪገረሙ ድረስ እና እግሮችዎ ሳምንት ስለሚሆኑ በፍጥነት መራመድ እስኪያቅታቸው ድረስ ሰዎችን ይመለከታሉ ከዚያም መራመድ በማይችሉበት ጊዜ ይስቃሉ	1
ሜትሮውን እየጠበቅኩ ነበር ሰዎች አይተውኝ እንዴት እንደለበስኩ እና እንዴት እንደምመስል አስተያየት መስጠት ጀመሩ	1
ይህ ክስተት የተከሰተው በ ከቀኑ ሰአት አካባቢ በሜትሮ ጣቢያ ነውጓደኛዬ ብዙውን ጊዜ በዚህ ጣቢያ ላይ በየቀኑ ትንኮሳ ይደርስበታልይህን ለማስቆም ደህንነቱ የተጠበቀ ከተማ እንድትወስድ እፈልጋለሁበጣም ደህንነቱ ያልተጠበቀ ነው (እባክዎ)	1
በጣም መጥፎ ልምዴ አንድ ጊዜ ከፖንዳ ወደ ፓንጂም ጂዮቲ () በተባለ አውቶቡስ ስጓዝ ነው) የአውቶቡሱ መሪ የግማሽ ትኬት ተሳፋሪ መሆኔን ሲያውቅ በጣም መጥፎ ቃላትን በመጠቀም መጥፎ ነገር መናገር ጀመረ	1
ጥቂት ወንዶች ሴት ልጆችን አስተያየት ሲሰጡ አንድ ክስተት አይቻለሁ ልጃገረዶቹ አስቁሟቸው ከዚያም መሳቅ ጀመሩ ከሰአት በኋላ ተከሰተ	1
ሰላም ምስባህ ይህ ክስተት ከ አመት በፊት በእኔ ላይ ደርሶብኛል ከአሰልጣኝነት ትምህርቴ የወጣሁት በክፉ እሽግ ነው እና ወደ ባንድራ በባቡር መጓዝ ነበረብኝ ከቀኑ ሰዓት አካባቢ ነበር ባቡሩን እየጠበቅኩ በፓርል ጣቢያ ቆሜ ነበር መድረኩ በጣም ተጨናንቆ ነበር እና ሰዎች እያዩኝ በላዬ እና ጂንስ ላይ አስተያየቶችን የሚያልፉ ነበሩ ባቡሩ ሲደርስ ከጄንት ክፍል የመጡ ወንዶች እኔን ለማዋከብ የቦሊውድ ንጥል ዘፈኖችን እያሾፉ እና እያፏጩ ዘፈኑአስጨናቂ ነበር እና አጠገቤ የቆሙት ጥቂት ሴቶች ምንም አላደረጉም ግራ ተጋባሁ እና ይህ ህይወቴን በሙሉ የማስታውሰው አንድ ተሞክሮ ነው	1
ባቡሬ ከጠዋቱ ፡ ላይ ደርሶ ነበር ቲቲ መውጫው ላይ በጣም ደነዘዘኝ እና ጠንከር ያለ እይታ ሰጠሁትከዚያ በኋላ አንድ አዛውንት ወደ ደረጃው ሲወጡ አስተያየት ሲሰጡኝ እየደወሉኝ እየጠነከሩ ፊታቸውን አደረጉኝ ፉክ ኦፍ አልኩት	1
እኔ ወንድ ልጅ ነኝ ብዙ ጊዜ አስተያየት እሰጣለሁ (ድመት ጥሪዎችየፊት ገጽታ እና አንድ ቀን እኔም ተከትዬ በሽቦ የሚመስል ሰው በጣም አስፈሪ ነበር	1
የአውቶቡስ መሪ ስለ አለባበሴ አስተያየት ሰጠ እና መጥፎ ቃላትን ተናገረ	1
በአውቶቡስ እየተጓዝኩ ነበር ሴት ልጅ በአውቶቡስ ውስጥ በአንድ ወንድ ልጅ ተገድዳ እና ተጎዳች	1
አጠገቤ በአውቶቡስ የተቀመጠ ሰው ሊያናግረኝ ጀመረ እና ችላ አልኩ በተሽከርካሪው ውስጥ በነበሩት ሌሎች ተሳፋሪዎች ታድጓል	1
የወንዶች ቡድን አፀያፊ አስተያየቶችን እያስተላለፉ ነበርከሰአት በኋላ በሳኬት ሜትሮ ጣቢያ ተከሰተ	1
መንገድ ላይ ስሄድ አንድ ማ አስተያየት ሰጠህ ምንም እንኳን የልጅ ልጅ ብትሆንም ትልቅ ነገር (ጡት) አለህ ከዚያም ያንን አስተያየት በመስጠቱ ወቀሰው እና በአቅራቢያው ያሉ ሌሎች ሴቶችም ተሳደቡት	1
ሁለት ወንዶች ልጆች ፊቴ ላይ ጨዋነት የጎደለው ድምጽ አሰሙ	1
በአውቶቡስ ውስጥ ትንኮሳ	1
የቺንኪ እና የቺክኒ አይነት አስተያየቶች	1
ሰንሰለት መንጠቅአስተያየት መስጠትማሽኮርመምየፊት መግለጫዎችሌሎች	1
የወንዶች ቡድን ተገቢ ባልሆኑ ቦታዎች ሊመታኝ እና በመደበኛነት ያፏጫል	1
አራት ሰዎች ስለ አንዲት ሴት ልጅ አስተያየት እየሰጡ ነበር	1
በብሉይ ዴሊ በሚገኝ ቤተ ክርስቲያን አጠገብ እያለፍኩ ነበር እና ጥቂት ሰዎች በምሽት ሰዓታት አስተያየት መስጠት ጀመሩ	1
መንገድ ላይ እየሄድኩ ነበር አንድ ሰው በአቅራቢያው መጣበመንገድ ላይ ሌላ ሰው አልነበረም ጓዳውን ከፍቶ ብልቱን አሳየኝ እና ቆሻሻ ቃላት ተናገረ እሸሻለሁ	1
አንድ ወንድ ተከተለኝቦርሳዬን ትቼ መሸሽ ነበረብኝ ለመውሰድ ጓደኛዬን መጥራት ነበረብኝ	1
ሞለስተር ጓደኛዬን በባባሪ ማንዲ አቅራቢያ በተሽከርካሪዋ ላይ አየችው እና ሊወጡ ሲሉ በብስክሌት ላይ እያለች ፓሉዋን ለመያዝ ሞከሩ እሷ ግን ወቀሰቻቸውግን እንደ አለመታደል ሆኖ ለቀቃቸው	1
ከትምህርት ቤት ወደ ቤት ስሄድ አንድ ወንድ ልጅ ሁለት ሴት ልጆችን ሲያሾፍ አየሁ ልጃገረዶቹ በአውቶቡስ ማቆሚያ ላይ ለአውቶቡስ እየጠበቁ ነበር ልጃገረዶቹ ከአንድ አዛውንት እርዳታ ጠየቁ እና እዚያ አበቃ	1
ከ እስከ ሰዎች ያሉት ቡድን በኮብልስ ድንኳን አጠገብ ቆሞ ነበር ከላይ እስከ ታች ያሉ ሴቶች ወደዚያ መንገድ የሚደርሱትን ሴት ልጆች ያለማቋረጥ ሲያዩ ተመለከትኩ	1
ሁለት ወንዶች ልጆች በእኔ እና በጓደኞቼ ላይ አስተያየት ሰጥተዋል	1
ከኮሌጅ እየተመለስኩ ነበር እና ያ ቀን በጣም እየዘነበ ነበር ሪክሾ ማግኘት ስላልቻልኩ ማህበረሰቤ ከሜትሮ ጣቢያው የ ደቂቃ የእግር መንገድ ርቀት ላይ ስለሆነ ለመራመድ ወሰንኩ አንድ ብስክሌተኛ አየሁ አስቆመኝ እና አቅጣጫ ጠየቀኝአልኩት ከዚያ በኋላ ለምን ብቻህን ትሄዳለህ ብሄድ መጠየቅ ጀመረእሱን ችላ ብዬ መራመድ ስጀምር ብስክሌቱን ገልብጦ ጃንጥላውን አትጠቀም ምናልባት ወንዶች ነገሮችን በማየታቸው እድለኛ ይሆናሉ አለ እና እሱ በብስክሌት ላይ እንዳለ እንዳልኩት ምንም ማድረግ አልቻልኩም እንዲሁም መንገዱ በሙሉ ባዶ ነበር በዚያን ጊዜ የምፈልገው ወደ ቤቴ በፍጥነት መሄድ ብቻ ነበር	1
ጠማማዎች እንደዚህ አይነት አስተያየቶችን ሲሰጡ ማልቀስ ይፈልጋሉ	1
አንድ ሰው ከኋላ ሆኖ ሊነካኝ እየሞከረ ነበር	1
በሌሊት ጥሪዎች እና አስተያየት መስጠት	1
ሰዎች በመንገድ ላይ አግባብ ባልሆነ መንገድ ነክተውኛል	1
በአንዳንድ ሰዎች መጥፎ ባህሪ	1
አንድ ጓደኛዬ ከትምህርት ቤት እየተመለሰ ሳለ አንድ የማታውቀው ሰው በሁለት ጎማ ቆሞ ወደ አንድ ቦታ አቅጣጫ ጠየቃት ልክ እንደነገረችውፈገግ አለና ወደ ታች እየጠቆመ ይህን አይተሃል?ብልቱ ወጥቷል ለአንድ ደቂቃ ያህል ባዶ ሆና ሸሸች	1
አንድ ሰው በብስክሌት መጥቶ ስልኬን ነጠቀው	1
በኮሌጅ ህይወቴ በዴሊ ውስጥ በሁሉም ቦታ ማለት ይቻላል ሞኞች እና ቫጋቦኖች አጋጥመውኛል ጨዋነት የጎደለው አስተያየቶችን አልፈው ጨዋነት በጎደለው መንገድ ያፏጫሉ ወይም ጸያፍ ምልክቶችን ያሳያሉ ይህም ሌላውን ሰው (ልጃገረዶች) ያሳፍራል እና ንቃተ ህሊና ይኖረዋል	1
አንድ ሰው ስለእኛ አስተያየት መስጠት ሲጀምር ከጓደኞቼ ጋር ነበርኩ	1
ቆሻሻ አስተያየቶችን አሳልፎ የጠየቀኝ ሰው ነበር በሌሊት ተከስቷል	1
በምንጓዝበት ጊዜ እንግልት ይደርስብናል በዚህም ምክንያት የትም መሄድ አንችልምይህ የሆነው ከወራት በፊት በሌሊት ነው	1
በሌሊት የተነሱ አስተያየቶችመጨናነቅ እና ምስሎች	1
በአውቶቡስ ፌርማታ ላይ አውቶብሴን እየጠበቅኩ ሳለ አንድ ሰው ደውሎ አስተያየት ሰጠ	1
ከፖዳር ትምህርት ቤት ሴት ተማሪዎች በርካታ ቅሬታዎችን ሰምቻለሁ ዛሬ ግን እኔም አጋጥሞኛል ብዙ ወንዶች በሳንታክሩዝ (ደብሊው) ስካይ ዋልክ ላይ ይንከራተታሉ እና አይናቸውን በሴት ልጅ ላይ ሲያነሱ እሷን መከተል ይጀምራሉ ምን እያደረጉ ነው ብለው እስከጠየቋቸው ድረስ ችላ ይሉሃል እና ይሄዳሉ	1
ማለፊያ አስተያየቶች	1
ከአውቶቡሱ ወርጄ ወደ ቤት ከሄድኩ በኋላ አንድ የመኪና ሹፌር እና ጓደኛው ለ ሜትሮች ያህል ተከተሉኝ እና ጨዋነት የጎደለው አስተያየት እየሰጡኝ ነበር ደስ የሚለው ነገር የበረሃው የመንገዱ ክፍል እንዳለቀ ወደ ኋላ ተመለሱ ለአጭር ርቀት ብቻ ነው ብለው ቢናገሩም አሽከርካሪው ጓደኛ ወዳለበት መኪና ውስጥ በጭራሽ አይግቡ	1
ከኮሌጅዬ ስመለስ በሻይ ሱቅ ውስጥ ሲጋራ የሚያጨሱ ወንዶች ልጆች ነበሩየፍትወት ቀስቃሽቆንጆ አስተያየት በመስጠት ያሾፉኝ ነበር እንዲሁም ያፏጩኝ ነበር	1
ከሰዓት በኋላ በአውቶቡሶች ውስጥ ስለ ልጃገረዶች አስተያየት መስጠት	1
በመንገድ ላይ ስሄድ አንድ ሰው ወደ አንዲት ልጅ መጥቶ ነክቶት ‘ሴሰኛ ሆይ! እድል ስጠኝ እሱ ደግሞ ተከትሏታል	1
የሜዳ አህያ ማቋረጫ ላይ መንገድ ሲያቋርጡየወንዶች ቡድን ሁል ጊዜ መጥፎውን አስተያየት ያልፋሉ ወይም በአለባበሳችን ላይ አስተያየት ይሰጣሉ ይህም በጣም ይረብሸናል አንዳንድ ጊዜ ኮሌጅ እንዳልገባ ይሰማናል	1
ወደ ሥራ ለመጓዝ ባቡሩን እጠቀማለሁ ከ ወራት በፊት ከባቡሩ ስወርድ አንድ ሰው ስለ እኔ ወሲባዊ ጸያፍ አስተያየቶችን ሰጥቷል	1
እኔ ሰው ነኝ በዚያ መንገድ ለሚያልፉ ልጃገረዶች አላስፈላጊ አስተያየቶችን የሚያስተላልፍ የወሮበሎች ቡድን ያየሁበት በሂሌቶሌል ውስጥ ስሄድ ነበር	1
በመጥፎ ዓላማ በዲቲሲ አውቶቡሶች ውስጥ መንካት	1
ባዶ በሞኝ የብስክሌት አሽከርካሪዎች መንካት ያንን ብቻ መጠበቅ አይቻልም በልጃገረዶች ላይ ችግር የሚፈጥሩ አንዳንድ ህገወጥ ንጥረ ነገሮች አሉአንዳንድ ጊዜ አንዳንድ ሰዎች በልጃገረዶች ሆስቴል ፊት ወይም በቅርበት ሊገለጽ በማይችል ተግባር ይታያሉ እነዚያ መጥፎዎች ይህን ሲያደርጉ ምን እንደሚያገኙ አታውቁም አካባቢው ከቮዳፎን መደብር ጀርባ ባለው የዴና ባንክ መስመር ዙሪያ በአያፓ ማህበረሰብ ውስጥ በሃይደራባድ ውስጥ ማድሃፑር ነው	1
በሌሊት በሴላምፑር ገበያ ሳልፍ በሴት ልጅ ላይ እያፏጨሁ	1
መንካት	1
አንድ ጓደኛዬ በአሰልጣኝ ጓደኛዋ ተነካ	1
ከጓደኛዬ ጋር ወደ ቤት እየሄድን ነበር እና በድንጋይ ላይ የተቀመጡ አንዳንድ ወንዶች ልጆች አስተያየት ይሰጡናል ሁልጊዜም እዚህ በሶዌቶ ውስጥ ያደርጋሉ	1
ከሰአት በኋላ ተነካሁ እና ተንከባለልኩ	1
አንድ ጊዜ ወደ ክፍሌ እየሄድኩ ነበር እና አሁን የተከተሉኝ የወንዶች ቡድን ነበር ይህም ሊያስለቅሰኝ ተቃርቧል	1
እኔ እና ጓደኞቼ እዚያ ትምህርት ስንወስድ በየቀኑ ይጋጠሙኝ ነበር	1
በካምላ ናጋር ገበያ ነበርኩ አራት ወንዶች ልጆች እኔን ተከትለው ስለ እኔ አስተያየት መስጠት ጀመሩ	1
በአዛድፑር አውቶቡስ መንገድ ጠዋት ላይ አስተያየት መስጠት	1
የማደናቀፍ ባህሪ	1
ስለ ሴት ልጆች አስተያየት	1
የተጨናነቁ ቦታዎች ወሲባዊ ጥቃቶች የሚፈጸሙባቸው በጣም ብዙ ናቸው በተጨናነቀ አውቶቡስ ላይየተጨናነቁ ጎዳናዎች ወንዶች ጠያቂውን መለየት ባለመቻላቸው ሴቶችን ይጠቀማሉ ግሮፒንግ እና ወሲባዊ ቋንቋ ብዙ ጊዜ ጥቅም ላይ ይውላል	1
የድመት ጥሪዎችፉጨትአስተያየት ሰጪሌሎች	1
ከቅርብ ጓደኛዬ ጋር እየገዛሁ ሳለ እዛ ያለው የዘፈቀደ ሰው እኛን ማየት እና ዘፈኖችን መዘመር ጀመረ	1
በቤቴ አቅራቢያ ያሉትን ወንዶች ስወጣ ስሜን ከሌላ ወንድ ልጅ ጋር በመቀላቀል ያሾፉብኝ ነበር ትኩር ብለው ይመለከታሉአስተያየት ይስጡ	1
በአንደኛው ሰው ዙሪያ እየተዘዋወርኩ ሳለ አስተያየት መስጠት ጀመረ	1
ስለዚህ እኔ አንድ ምሽት ወደ ቤት መሄድ እና ይህን ነገር እንደማሳልፍ ነበር እና ልክ እንደ ዘግይቶ አልነበረም ምናልባት ልክ እንደ በጣም አልዘገየም እና ልክ ወደዚህ ፓርቲ ሄጄ በጣም ተጨንቄ ነበር እና ከዚያ ወደ ቤት መምጣት ነበረብኝ ወላጆቼ እንደ ጥብቅ ናቸው? ስለዚህ ታክሲ እወስዳለሁ እና ልክ እንደሌሎቹ የታክሲ ሹፌሮች በሚያምር አለባበሴ ላይ አስተያየት መስጠት ጀመሩ እና መጨነቅ እወዳለሁ! ከዚያም የወንድ ጓደኛዬ መረጋጋት እንደምወድ እንደነገረኝ መጮህ እና መጮህ እጀምራለሁ! ምንም እንኳን ያላደረገው እንዴት ያለ አዋቂ ነው! ሙሉ በሙሉ ከእሱ ጋር እለያለሁ! ስለዚህ ለማንኛውም ያ ነው	1
አመሻሹ ላይ ወደ ፒጂዬ እየተመለስኩ ነበር አንዳንድ የዘፈቀደ ወንዶች ልጆች በመንገድ ጥግ ላይ ቆመው አየሁአስተያየት መስጠት ጀመሩግራ ተጋባሁ ስለዚህ ችላ አልኩ እና ሄድኩ	1
የጓደኛዬ ፍቅረኛ ሰርቃለች ተብሎ በተከሰሰችበት ወቅት ሊስማት ሞከረ	1
በመጀመሪያ እነዚህ ሰዎች አስተያየት እየሰጡ ነበር እና በድንገት ሰንሰለቴን ነጥቀው ሸሹ	1
በተመሳሳይ ሰው በአውቶ ሶስት ጊዜ የማይመች ንክኪ አንዴ ከተዋከብኩ እና ሁለት ጊዜ ከእሱ ራቅኩት ካንዲቫሊ (ኢ) ጣቢያ ወደ ታኩር መንደር ይሄዳል	1
ሁለት ወንዶች ልጆች ስለ ሴት ልጅ ልብስ አስተያየት ሲሰጡ ነበር በጣም አሳፋሪ ነበር ምሽት ላይ ሆነ	1
በማህበረሰብ መጸዳጃ ቤት አቅራቢያ ያሉ ወንዶች ልጆችም እያዩኝ አስተያየት ተላለፈ	1
ሰውዬው በቦታው አቅራቢያ በዚህ ቦታ ሰክሯል ከዚህ ሴቶች የሚሄዱበት ሼፍ የለም	1
ይህ ክስተት በጓደኛዬ ላይ የደረሰው ወደ አክስቷ ቦታበአውቶቡስ ማቆሚያ ላይ ስትሄድ ነው	1
አንዳንድ ወንዶች ልጃገረዶቹን አስተያየት ይሰጡ ነበር	1
በኡታም ናጋር ተርሚናል ላይ አንዳንድ መጥፎ ወንዶች ልጆች ከዚያ ስለሚሄዱ ሰዎች በተለይ በሴቶች ላይ አስተያየት ይሰጡ ነበር	1
ወንዶች ስለ ሴት ልጅ አስተያየት ይሰጡ ነበር	1
አንዳንድ ወንዶች የድመት ጥሪዎችን እና ጨዋነት የጎደለው የፊት ገጽታ ያደርጉ ነበር	1
ከጓደኛዬ ወንድም ጋር ሲመረቅ ሆነ የቅርብ ጎረቤቱ ወሲባዊ ጥቃት ሊፈጽምበት ቢሞክርም ለወላጆቹ ሲነግራቸው አመለጠ በንቃተ ህሊናው ምክንያት አንድ ትልቅ ክስተት ተከልክሏል	1
በአካሽ የአሰልጣኝነት ትምህርት ከተከታተልኩ በኋላ በፕራታፕ ናጋር ወደ ቤቴ እየተራመድኩ ነበር አንዳንድ ሰዎች እኔን መከተል ጀመሩ እና ጸያፍ አስተያየቶችን ሰጥተዋል መንገዱን ለማቋረጥ ምልክት ላይ ስቆም ፎቶ ሊያነሱኝ ሲሞክሩ አስተዋልኩ ደስ የሚለው ነገር በአቅራቢያው አንድ የፖሊስ መኮንን ነበር ምንም እንኳን ምንም ነገር ባያደርጋቸውም እንደነሱ ላሉ ውሾች በቂ አይደለም	1
በጆድፑርራጃስታን ለ ወራት ያህል እንደ ባዕድ አገር እየኖርኩ ነበር አንድ ላይ ሆኜ ብዙ የፆታዊ ትንኮሳ ሁኔታዎች አጋጥመውኝ ነበር እና ይህ የእነርሱ ማጠቃለያ ነው አንድ ጊዜ ምሽት ላይ እየተራመድኩ ነበር እና አንድ ልጅ በብስክሌት አልፎ አልፎ እያለፈ ጡቶቼን ለአፍታ ጨመቀ በጓደኛዬም ላይም ተመሳሳይ ነገር ደረሰአንድ ጊዜ በመንገድ ላይ ያለ አንድ የዘፈቀደ ልጅ በእግር ስሄድ ይከተለኝ ጀመር እና እጄን ይዞ አቅፎኝ ነበር ማየት እና አስተያየት መስጠት የዕለት ተዕለት ነገሮች ነበሩ ብዙ ጊዜ ማፏጨት ተከሰተ እና እኔም እንዲሁ ጮህኩኝ በአደባባይ አንተን መበዳት እፈልጋለሁ ሁል ጊዜ ወደ አንድ ቦታ ስሄድ ሰዎች እኔን ወንዶችም ሴቶ…	1
ይህ የሆነው ከጓደኛዋ ጋር ከጓደኞቿ ጋር በነበረችበት ወቅት ነው	1
አንድ ልጅ ምሽት ላይ ጎትቷል	1
ወደ ትምህርት ቤት እየሄድኩ ሳለ ትንኮሳ ደረሰብኝ	1
ከትምህርት ቤት ስሄድ የወንዶች ቡድን ባንግ ሲያጨሱ አየሁ እና ይህን ሲያዩ ፈርቼ አሁን ማግባት አለብኝ ብለው እያሳደዱኝ ይሰድቡኝ ጀመር	1
በካሮል ባግ ገበያ አምፕ ከ ጓደኞቼ ጋር እየተዝናናሁ ነበር ከዛ ሰዎች እየተከተሉን ነበር እና እነሱም መጥፎ አስተያየቶችን እየሰጡ ነበር	1
ምሽት ላይ ስወጣ ጥቂት ወንዶች ልጆች ያስቸግሩኝ ጀመር አልፎ ተርፎም ስሜን ጠርተው ስለ እኔ አስተያየት መስጠት ጀመሩ	1
በሪክሾ ውስጥ እያለሁ ሰንሰለቴ ተነጠቀ	1
የወሲብ ምልክቶች ከአስተያየቶች እና ፉጨት ጋር	1
ባለፈው ወር ከጓደኛዬ ጋር ተከሰተ አንድ ሰው ወደ እሷ ቀረበ ከእርሷ ጋር አካላዊ ለመሆን ሞከረ	1
ማየት እና ተዛማጅነት የሌላቸው የማይቋቋሙት አላስፈላጊ አስተያየቶች	1
ዕድሜ ዓመት የሞላው የትንኮሳ አይነት በሌህ ውስጥ በኢቤክስ ቅኝ ግዛት ውስጥ ማውራት (በቀን ሰዓት) በ ታክሲ ውስጥ የሚደረጉ ጥሪዎች በሌህ (በቀን ሰዓት) የዴይሞ ቶንግ ዱክ አስተያየት መስጠት (ጥሩ ይመስላል) (የቀን ሰዓት) የግብረሥጋ ግንኙነት አዎ (በቀን ሰዓት) ይጋብዛል	1
አስተያየት መስጠት እና መተኮስ እና ተገቢ ያልሆኑ ድርጊቶች	1
ዘፈኖችን መዘመር አስተያየቶች በሕዝብ ማመላለሻ እና በመንካት ውስጥ ያሉ የፕሬስ አካላትን ያፏጫሉ	1
ድመት መጥራትአስተያየት መስጠት እና መቧደን የእለት ተእለት ክስተት ነው	1
ስኩቲ ላይ ሆነው ምልክቱ ወደ አረንጓዴነት እስኪቀየር በመጠባበቅ ላይ እያሉ ሰዎች ያሉት ቡድን እየጀመሩ እና ጨዋነት የጎደላቸው አስተያየቶችን እየሰጡ ነበር	1
ይህ ክስተት የተከሰተው ከሰአት በኋላ በጃንፓት ከምሽቱ ሰአት አካባቢ ነው ለገበያ ነበርን እና ይህ የመንገድ ዳር ሻጭ ቀበቶ የሚሸጥበት ነበር ቀበቶዎቹን እንድንገዛ አስገደደን ፈቃደኛ አልሆንንም ስለሆነም በመጥፎ መንገድ አስተያየት መስጠት ጀመረ እና እኔ በግሌ አልሆንኩም ወደውታል እና መጥፎ ተሞክሮ ነበር	1
አንዳንድ ወንዶች ጨዋነት የጎደለው አስተያየት እየሰጡ ያፏጫሉ	1
ምሽት ላይ ሳለሁ አንዳንድ በደንብ የተነበቡ ወንዶች ጨዋነት የጎደለው ባህሪ ነበር	1
በመንገድ ላይ እየተራመደ ሳለ ከህንጻው በረንዳ የመጣ ሰው በፉጨት ወደ ቤቱ እየጠራኝ ነበር ያ አካባቢ ከተለያዩ ቦታዎች የመጡ ተማሪዎች ለውድድር ፈተና ለመዘጋጀት በሆስቴሎች የሚኖሩበት ጨዋ ያልሆነ ልብስ አልለበስኩም ነበር ሳልዋር ለብሼ ነበር	1
ብስክሌተኞች አስተያየት ሲሰጡ እና ሲያፏጩ	1
በእኔ ላይ አልደረሰም ነገር ግን በቲሃር ጊዜ አንድ ወንድ ልጅ ሲያጨበጭብ አየሁ እና ከሴት ልጅ ጋር ሲያጨበጭብ አየሁ በቡድን ውስጥ ዲዩሲን ለመጫወት በመጣው የቫን ጣሪያ ላይ ነበር እሱ ደግሞ ዘፈን እየዘፈነ ነበር ሴት ልጅ በጣም ፈርታ አየሁ ሁኔታዋ በጣም ደካማ ነበር	1
አላፊ እያለሁ ነበር እና አንዳንድ ወንዶች ልጆቼ ምን ያህል ጥብቅ እንደሆነ ይወዳሉ ማለት ጀመሩ	1
በጎዳናዬ ላይ በየቀኑ በወንዶቹ እንዋከብበታለሁ ስለ ጡቶቼ እና ቂጣዬ አስተያየት ይሰጣሉ እና አንድ ቀን ከእኔ ጋር የግብረ ሥጋ ግንኙነት ይፈጽማሉ ይላሉ እነሱ ጨዋነት በጎደለው መንገድ ይነካሉ ግን ሁልጊዜ ከእነሱ እሮጣለሁ ይህን የሚያደርጉት የመንገድ መብራት ስለሌለ ነው	1
ከሰአት በኋላ በሎክሃንድዋላ በመንገዱ አንድ ክፍል ላይ በአደባባይ ትንኮሳ ደረሰብኝ ማንም ቃል አልተናገረም እና ሁለቱን ወንድ ልጆች በብስክሌት ለመጋፈጥ ስሞክር በፉጨት ሄዱ	1
በዴሊ ሜትሮ እየተጓዝኩ ነበር እና አንድ ሰው በፍትወት የተሞላ አላማ ያለው ሴት ልጅን እያየ ነበርከጥሩ ጊዜ በኋላ መውሰድ አልቻልኩም እና በእሱ እይታ ቆሜ ተራ እይታ ሰጠሁት እንደ እድል ሆኖ መልእክቱን ልኳል	1
በዚህ ቦታ ውስጥ በሁሉም ቦታ ለአስተያየቶች ተገዢኦግሊንግወዘተ	1
በመኪና ተከታትሏል	1
ከጓደኞቼ ጋር በሜትሮ እየተጓዝኩ ነበር እና ሶስት ወንዶች ልጆች እያዩኝ ነበር እና በእኔ ላይ አስተያየት መስጠት ጀመሩ ጓደኞቼን ይረብሹ ነበር እና እኛንም መከተል ጀመሩ ነገር ግን ሮጥን	1
ከኮሌጅ ወደ ቤት እየሄድኩ ሳለ አንዳንድ ሰዎች እያሳደዱ እና አስተያየት እየሰጡ ነበር	1
በዓላማ ጥሩ ያልሆኑ ብዙ የወንዶች ቡድን ነበር	1
ከእህቴ ጋር እየተራመድኩ ነበር አንድ ሰው ፎቶችንን ጠቅ አድርጎ በጣም መጥፎ ቃላትን በመናገር እና በማስፈራራት ፎቶውን በፌስቡክ ላከልን	1
በባንድራ አውቶቡስ ጣቢያ እና በአገር ውስጥ ባቡሮች ውስጥ በአክሲዮን አውቶማቲክን መንካት	1
በመንገድ ላይ ሲራመዱ	1
አንዳንድ ስራዬን ልሰራ ነበር አንዳንድ የጉን አይነት ሰዎች በተሽከርካሪዎቻቸው ላይ ተቀምጠዋል ስያልፍ እኔን መከተል ጀመርኩ እና አስተያየቶችን አስተላልፌ በመጨረሻ ተገልዬ ልጮህኝ ሞከርኩ ነገር ግን እኔ ጮኸችእንዲሸሹ ለማድረግ ጫጫታ አሰማ	1
ድመት አስተያየት እና ጨዋነት የጎደለው መጋለጥ	1
ሰዎቹ በጣም ርካሽ አስተያየት እየሰጡ ነበር	1
በትምህርት ቤት ውስጥ ከስፖርት በኋላ አርብ ላይ ነበር እኔ እና ጓደኛዬ ወደ ቤት እየሄድን እና በጎጎ አንዳንድ ወንዶች ልጆችን አገኘን ጓደኛዬን ደውላ ግን ችላ ብላ ን ማጎሳቆል ጀመሩ	1
በዚህ አካባቢ ያለው ደካማ የብርሃን ሁኔታ በህብረተሰቡ ልጃገረዶች ላይ ብዙ ጥቃቅን ወንጀሎችን ያስከትላል	1
ሰላምወደ ቤት ስመለስ የሚከተለው ክስተት ከእኔ ጋር ሁለት ጊዜ ተከስቷል ከምሽቱ እስከ ሰዓት ባለው ጊዜ ውስጥ ከካሳርቫዳቭሊ ናካ አጠገብ ባለው መስመር ላይ ወደ ታኔ ሙንሲፓል ጋርደን ጎን እሄድ ነበር ወደምሄድበት አቅጣጫ የሚያልፉ ወንዶች ቆሙ ፊቴ ላይ ፈትሸው ወደ ፊት ሄዱ ጠንከር ያለ ጨዋነት የጎደለው መልክ ሰጠሁ ነገር ግን መስመሩ ስላልበራ የቃል ውጊያ ውስጥ አልገባሁም የሚያልፉ ሰዎች በጣም ጥቂት ነበሩ በጣም የሚያስደንቀው ነገር በአንድ ወቅት ሳልዋር ካሜዝ ለብሼ ነበር ማንቂያ አንድ ከሀዋሬ የመኖሪያ ፕሮጀክት በፊት ርካሽ የሆነ የመጠለያ ቤት አለ በእግር እየተጓዝኩ ባለው መስመር ልጆቹ ወደ አንድ አቅጣጫ እየሄዱ ነበር …	1
በጣም መጥፎ ነበር ሁልጊዜ ማለት ይቻላል ይከሰታል ከመጠን በላይ ተጨናንቋል	1
አንዲት ሴት በመንገድ ዳር ስትራመድ በብስክሌት ላይ ያለ ሰው እያያት ሴሰኛ እንደሆነች እና አልጋ ላይ ጥሩ እንደምትመስል ተናገረች	1
በግንባታ ላይ ካለው በረንዳ ላይ ስተኛ አንድ ልጅ አስተያየት ሰጥቷል	1
ወደ ክፍል ሲሄዱ በመንገድ ላይ መራመድ	1
በ ዓመቴ አካባቢ ወደ ቤንጋሊ ገበያ ሄጄ አንዳንድ መድኃኒቶችን ለመግዛት ቫይረስ ስላለኝ እና አንቲባዮቲኮችን ስለምፈልግ ወደ ኋላ ስመለስ አንድ ሰው ጆሮዬ ላይ ሹክሹክታ ሲናገር ሰማሁ እና ስመለከት በ የዕድሜ ክልል ውስጥ ያለ አንድ ልጅ በብስክሌት ሲጋልብ አገኘሁት ከፊት ለፊቴ ሄደ ነገር ግን ወደ ኋላ እያየ ምልክቶችን ማድረጉን ቀጠለ ከጥቂት ሰከንዶች በኋላ ተመልሶ ያንኑ ደገመው ሶስተኛ ሙከራውን ሊያደርግ ሲል ወደ ማንዲ ቤት ጎላምባር በፍጥነት መሄዱን አይቼ ስልክዬን ደወልኩ ለመጀመሪያ ጊዜ በሹክሹክታ እና አስተያየት ሲሰጥ ችላ አልኩ ነገር ግን ያንን ለማድረግ ሲደፍር ለሁለተኛ ጊዜ ተናድጄ ነበር ግን እኔ ብቻዬን ነበርኩ እ…	1
ይህ ክስተት የተከሰተው ከኮሌጁ () ወደ ፒትማፑራ ሜትሮ ጣቢያ በተዘረጋው ሀይዌይ አቅራቢያ ነው ሴፕቴምበር አካባቢ ነበር እና ከሰአት በኋላ ሆነ አንድ ሰው ብልግና አስተያየት ሰጠ እና ሌላ መሳም ነፈሰ	1
ይህ ክስተት የተከሰተው ከሰአት በኋላ በጂቲቢ ሜትሮ ጣቢያ ነው አንድ ልጅ በርቀት ተከታትሎ ሄሎ እያለ ነበርችላ አልኩት	1
ባለ ጎማዬን መንዳት ስማር ወንዶች ልጆች በየቀኑ አስተያየት ይሰጡ ነበር	1
አንዳንድ የወንዶች ቡድን በዚያ መንገድ የምታልፍ ሴት ሁሉ ያሾፋሉ	1
ይህ ክስተት የተከሰተው በራምሊላ ማዳን አካባቢ ( ፣) አቅራቢያ ነውከቤቴ ፊት ለፊት ባለው መንገድ ላይ እየተራመድኩ ነበር አንድ የመኪና ሹፌር ወደ ጎን እያየ ነበር እና ሲያየኝ መጥፎ እና ጸያፍ ቃላትን መጮህ ጀመረ	1
ከቤተሰቤ ጋር ወደ ኮላባ መንገድ ገበያ ሄድኩ እኔን እየገዛሁ የብልግና አስተያየቶችን እያስተላለፍኩ እና እየዘፈንኩ ነበር	1
ወንዶች ኮሌጅ ሲገቡ እንደተለመደው አስተያየት ይሰጡ ነበር	1
ወደ ቤት ስሄድ በልጃገረዶች ተሳለቅኩኝ እና አስተያየት ሰጠኝ	1
እያየአስተያየቶችን ማለፍ	1
ሁለቱ አስተያየት ሲሰጡ እና ላይ እያዩ ነው	1
አንዲት ልጅ አንድ ሰው አስቆመው እና ምን ማድረግ እንዳለባት ሳታውቅ ስለፈራች ሊያታልላት ቀጠለ	1
የኛ ሴት ልጆችን በመጥራት ምሽት ላይ በቲያትር ቤቱ ዙሪያ ተደብቀው የሚገኙ የወንዶች ቡድን	1
እኛ ጓደኞች እርስ በርሳችን እየተነጋገርን ነበር ሴሰኛ ነው ብሎ አስተያየት የሰጠን አልፎ ተርፎም ሊነካን የሞከረ ልጅ መጣ አንዲት አሮጊት ሴት ያንን ልጅ ወቀሷት እና እንድንጠብቅ እና እንድንመለከት ነግሮናል	1
አንድ ጊዜ አንድ ሰው ምሽት ላይ ስሄድ እጄን ያዘ ብዙ አስተያየቶች እና የድመት ጥሪዎች አጋጥሞኛል	1
ይህ ክስተት የተከሰተው ምሽት ላይ በራጂቭ ቾክ ሜትሮ ጣቢያ ነው ከጣቢያው ወደ ኖይዳ ከተማ መሃል መድረክ እያለፍኩ ነበር እና ከመጸዳጃ ቤቱ ጀርባ አስተያየት እና የድመት ጥሪዎች መደረጉን አየሁ	1
ለተወሰነ ጊዜ በወንዶች ቡድን	1
አንድ ቀን ከእናቶቼ ፓልስ ስራ እየመጣሁ ሳለ በአደንዛዥ እፅ ስር ያለ ልጅ አገኘሁት እና ሰላምታ ሰጠኝ ነገር ግን ምላሽ ለመስጠት ፈቃደኛ አልነበርኩም ይህ ሴተኛ አዳሪ ማድረግ ጀመረ	1
በአውቶቡሱ ውስጥ ያሉ አንዳንድ ወንዶች ስለ አኃዛቸው እና ስለ ልብሳቸው ነገር ሲናገሩ በሴቶች ቡድን ውስጥ በጣም መጥፎ አስተያየቶችን ያስተላልፉ ነበር	1
የቤታችን ባለቤት አንዳንድ ጨዋነት የጎደላቸው አስተያየቶችን አስተላልፏል ምሽት ላይ ሆነ	1
በብስክሌት የሚሄዱ ወንዶች ርካሽ አስተያየቶችን እና እይታዎችን ያልፋሉ	1
ሰዎች ሳልፍ አስተያየት መስጠት ጀመሩ	1
ከቢሮ ስለሚመለሱ ልጃገረዶች ፎቶ ማንሳት እና አስተያየት መስጠት	1
መንገድ ከአምባቱር ኢንዱስትሪያል እስቴት አውቶቡስ ማቆሚያ የሚጀምር ነው እነዚህ ቦታዎች በተለይ ከምሽቱ በኋላ ቦታዎችን ማስወገድ አለባቸው በአካባቢው ያሉ ወንዶች ከልጃገረዶችሴቶች ጋር ብዙ መጥፎ ድርጊቶችን አይቻለሁ እና ሰምቻለሁ ስቃዩ የበለጠ የሚሆነው በመንገድ መብራቶች እጥረት ምክንያት እንደዚህ አይነት ክስተቶች ምቹ እንዲሆኑ ያደርጋል	1
ከቀናት በፊትወደ ቤቴ ስሄድ አንዳንድ ወንዶች እና አዛውንቶች እንኳን በእኔ እና በጓደኛዬ ላይ አስተያየት መስጠት ጀመሩ	1
በእግራችን ልንመታ ነበር እና በብስክሌት ላይ ያሉ የወንዶች ቡድን አስቸገሩን	1
ከምሽቱ ሰዓት አካባቢ በአትክልት ገበያ ውስጥ ተገቢ ያልሆኑ አስተያየቶች	1
በፓንቬል ውስጥ መከተል እና ማወዛወዝ በጣም የተለመደ ነው	1
እኔና እህቴ ወደ ቤት ስንሄድ አጭር ቀሚስ የለበሰች ልጅ በወንዶች ቡድን ስትሳለቅ አየን እንዲሁም አንድ ወንድ ልጅ እጇን ሊነካ ሲሞክር አይተናል ልጅቷ ተዋግታ ልጁን በጥፊ መታችው	1
ዳቦ ቤት ውስጥ ነበርኩ አንድ ሰው ወደ ዳቦ ቤት ገብቶ በቀጥታ ወደ ሴት ልጅ ሄዶ ምን ያህል እንደሚወዳት ሲነግራት ልጅቷ በእሱ ላይ ወጣች ሰውየውን አታውቀውም	1
ስኩቲዬን እያቆምኩ ነበር እና የራስ ቁርዬን እንዳነሳሁ አንድ ሰው በአጠገቡ እያለፈ አስተያየት ሰጠ እና በከፍተኛ ፍጥነት ወደ ፊት ሄደ	1
አንድ ወንድ ልጅ ሴት ልጅ ደውሎ በጣም ቆንጆ እንደሆነች እና አልጋ ላይ እንድትተኛ እንደሚፈልግ ነገራት	1
በየቀኑ ወይም በሌሊት ትንኮሳ	1
በአውቶቡስ () በ አቅራቢያ	1
የምቆይበት አካባቢ አሳዛኝ ነው ሁልጊዜም እነዚህ የቡድን ልጆች በመንገድ ዳር ቆመው ካርዶችን በመጫወት እና በእያንዳንዱ መንገደኛ ላይ አስተያየቶችን ያስተላልፋሉ አስተያየቶቻቸውን ችላ ለማለት እሞክራለሁ ግን እንደገና በተመሳሳይ ጊዜ ለምን ችላ እንደምል ይሰማኛል እንደ እኔ ያሉ ልጃገረዶች በመንገድ ዳር ሮሚዮዎች ላይ ቀላል ኢላማዎች እንዲሆኑ አልወድም ስለዚህ ጉዳይ ከወላጆቼ ጋር ስነጋገር እነሱም እንዲሁ ችላ እንዲሉኝ ይጠይቁኛል ግን በሆነ መንገድ ችላ ማለት አልወድም እነዚህ ወንዶች በልጃገረዶች ላይ የቆሸሹ አስተያየቶችን ስለሚያስተላልፉ ጥብቅ እርምጃ መውሰድ እፈልጋለሁ ስለዚህ ወላጆቻችን ከምሽቱ ሰዓት በኋላ ከቤት እንድንወጣ…	1
እኔ የማውቀው ሰው ላይ ደርሷል በሜትሮ ውስጥ እየተጓዘች ነበር ምክንያቱም በጣም የተጨናነቀ ነበር	1
ከአንድ ወንድ ጋር እየተራመድኩ ነበር እና ሰዎች አስተያየት ሰጡን	1
ይህ ክስተት የተፈፀመው እኤአ ጁላይ ቀን ምሽት ላይ አቅራቢያ ነው ሁለት በብስክሌት ላይ የነበሩ ሰዎች የሴትየዋን ሰንሰለት ነጥቀው የተወሰነ አድራሻ ሲጠይቁ እና እየሮጡ ሳለ መጥፎ አስተያየቶችን ሰጡ	1
ምሽት ላይ በሜትሮ መጋቢ (ናራና ቪሃር) ተከሰተ	1
ሳያስፈልግ ጽሑፎችን የሚልኩኝ የፊት መጽሐፍ ላይ አንዳንድ ጓደኞች አሉኝ	1
ምሽት ላይ በመንገድ ላይ ተከሰተ መኪና እየጠበቅኩ ነበር እና በተመሳሳይ ጊዜ የወንዶች ቡድን አስጨናቂ አስተያየቶችን አለፉ	1
አንድ ሰው በመጀመሪያ ስለ ማለፊያዬ አስተያየት ከሰጠ በኋላ አግባብ ባልሆነ መንገድ ነካኝ	1
አንዳንድ ግሮሰሪዎችን ከወሰድኩ በኋላ ወደ ቤቴ እየሄድኩ ነበር የፕራሙክ ቪሃር ማህበርን ከዋናው መንገድ ጋር የሚያገናኝ የመንገድ ንጣፍ አለ ሰዓቱ ፒኤም በብስክሌት ውስጥ ሰዎች አንዳንድ አስተያየቶችን ሲሰጡ አለፉኝ ከተወሰነ ጊዜ በኋላ ተመልሰው መጡ እና አስተያየቶችን ሲያስተላልፉ ሊነኩኝ ሞከሩ ጮህኩባቸው ከዚያም ሸሹ	1
አንድ ሰው ወደ ገበያ እየሄድኩ ሳለ ስለ መልኬ ለጓደኞቹ ጮኸ	1
ተከትዬ ወንዶች ልጆች እየሳቁ እና አስተያየቶችን ያስተላልፉ ነበር	1
በብስክሌት ላይ ያሉ ወንዶች አደረጉት	1
ጓደኛዬ ከኮሌጅ ወደ ቤቷ ስትመለስ በአራት ወንዶች ልጆች ክፉኛ ተጨንቆ ነበር	1
አንድ ሰው ?አምፕ ልጅቷን አጠቃች	1
ማታ ላይ የወንዶች ቡድን ደበደቡኝ እና ለደህንነቴ መሮጥ ስጀምር ጎትተው ወሰዱኝ መጮህ ጀመርኩ እና ህዝቡ ተሰበሰበሸሹ	1
በመንገድ ላይ ስሄድ አንዳንድ ወንዶች ልጆች አይተውኝ አስተያየት ሰጡኝ	1
በመኪና ውስጥ ያሉ አንዳንድ ወንዶች ስለ እኔ እና ጓደኛዬ በሩጫ ላይ ሳለን አስተያየት ሰጡ እና እኛን ለመከተል ሞከሩ	1
ምሽት ላይ ያሉ ወንዶች በመንገድ ላይ ለመራመድ ፈጽሞ የማይቻል ነገር ያደርጋሉ	1
በተጨናነቀ አካባቢ ነበርኩ አንድ ሰው የግል ክፍሌን ነካ ወደ ኋላ ስመለስ ቦታው በጣም የተጨናነቀ በመሆኑ ማን እንዳደረገው ማግኘት አልቻልኩም	1
በቡስፓርክ ጎንጋቡ ቆሜ ጓደኛዬን እየጠበቅኩ ነበር እና ሁለት ሴት ልጆች መጥተው ከጎኔ ቆመው ከእነሱ ጋር የግብረ ሥጋ ግንኙነት እንዲፈጽሙ ጠየቁ	1
የዚያን ቀን ባቡሮች ዘግይተው እየሮጡ ነበር እና መድረኩ በተጨናነቀ ነበር መድረክ ቁ ላይ ለመሄድ በድልድዩ ላይ ወደ ላይ ስንቀሳቀስ አንድ ሰው መንካት ጀመረ አስጠንቅቄዋለሁ ግን ጊዜ እንዲሁ አድርጓል በአደባባይ ጮህኩት እና ሸሸ	1
አንድ ሰው ወደ እኔ ቀረበና ጡቴን ያዘበአሁኑ ጊዜ ምንም ማድረግ አልቻልኩም ለወራት አሰቃቂ ነገር ተሰማኝ ብቻውን መጓዝ አልቻልኩም	1
ይህ በጓደኛዬ ላይ የደረሰ ክስተት ነውሁለቱም አለመግባባት ገጥሟቸው ልጅቷ በተወሰነ ደረጃ እንደተፈታ በማሰብ ሄደው ለመማር ሄዱበጀርባዋ ላይ የወንድ ጓደኛዋ አገኛት እና ይደበድባት ጀመር ልጅቷ በጣም ታምማለች እና በውርደት ምክንያት ቤት ውስጥ እንድትቆይ አድርጓታል	1
ሰንሰለት መንጠቅ ማሾፍ	1
ከትዕይንት ሜዳ እየሄድን ነበርአንዳንድ የሞተር ሳይክል ወንዶችን እንገናኛለንበትምህርት ለመቀጠል በጣም አርጅተናልና ከእነሱ ጋር ማግባት እንዳለብን ነገሩን	1
መዋኘት እየተማርኩ ሳለ የዋና አሰልጣኛዬ በትክክል ነካኝ	1
ጎብኚዎችን በደረት መድረክ ላይ ልወስዳቸው እየሄድኩ ነበርአንዳንድ የሞተር ሳይክል አሽከርካሪዎች ያፏጫሉ እና በአለባበሴ ላይ አስተያየት መስጠት ጀመሩ	1
ቦታዎቹ አስተያየቶችን በሚያልፉ ጨዋ ሰዎች ተሞልተዋል	1
ከተማችን በጣም ደህንነቱ ያልተጠበቀ ነው የበለጠ ሰብአዊነት ያላቸው ሰዎች ያሏት ከተማ እመኛለሁ ጓደኛዬ ባንጋሎር በሚገኘው አባቷ ተበድሏል	1
ምሽት ላይ በሜትሮ (ራጂቭ ቾክ) ውስጥ አስተያየት መስጠት ጥሪዎች እና ፎቶ ማንሳት ሊገለጽ አይችልም	1
በአውቶቡስ ውስጥ እየተጓዘ ሳለ መቀመጫዎች ባለመኖራቸው ምክንያት መቆም ነበረበት አውቶቡሱ ተጨናንቆ ነበር እና ስለዚህ ሁሉም ሰው በጣም ቅርብ ነበር በዚያን ጊዜ አንድ ሰው አግባብ ባልሆነ መንገድ ሊነካኝ ሞከረ	1
ልጆቹ በሳራንግፑር አውቶቡስ ማቆሚያ ላይ በቆሙት ልጃገረዶች ተደናግጠዋል	1
አንድ ቀን በሕዝብ ማመላለሻ እየተጓዝኩ ወደ ትምህርት ቤቴ እሄድ ነበር በጣም ጥድፊያ ነበር ለመቆም ምንም ቦታ አልነበረም እና ከተወሰነ ጊዜ በኋላ አንድ ሰው ከኋላው እንደያዘኝ አገኘሁ ምን ማድረግ እንዳለብኝ አላውቅም ነበር ክፉኛ ቆንጥጬዋለሁ እና በጣም መጥፎ መልክ ሰጠሁት	1
ክስተቱ የተፈፀመው እኤአ ህዳር ከቀኑ አካባቢ ነው ማስጠንቀቂያ ከወሰድኩ በኋላ ወደ ቤት እየተመለስኩ ነበር (አንዳንድ ነገሮችን ለማግኘት ገበያ መሄድ እንዳለብኝ ሳውቅ ወደ አካባቢዬ የአካባቢ ገበያ የሚወስደው መንገድ አልቀለለም (ነገር ግን በየቀኑ ወደዚያ እሄዳለሁ ስለዚህ አላመነታሁም በመንገዱ ላይ ስሄድ አንድ ሰው ሲለኝ ሰማሁ መንገዱ ስላልበራ በብስክሌት ላይ እንዳለ አላውቅም ነበርየብስክሌት መብራቶቹም ጠፍተዋል ) ልክ እንደዞርኩ ይህ ሰው በቀኝ እግሬ ላይ ብስክሌቱን ሲሰብር አየሁ (ሆን ተብሎ የተደረገ ወይም እንዳልሆነ አላውቅም) ወደ ስሜቴ ከመምጣቴ በፊት (ይህ ሰው በእውነቱ ብስክሌቱን ይዞ ሮጠ እና እዚያ በተጎዳ እግር…	1
በሌሊት ከ ሜትር በላይ ማየት እንኳን የማይችለውን የመንገድ መብራት የለም	1
ከጓደኞቼ ጋር እየተራመድኩ ነበር እና አንድ ወንድ በመንካት አለፈ	1
በቤቴ ሆነ ወንድሜ አስቸገረኝ እና አንድ ምሽትም ከእኔ ጋር መጥፎ ባህሪ አሳይቷል ስድስት ወር ሆኖኛል	1
በሌሊት አንዳንድ ወንዶች አንዳንድ አስተያየቶችን ያስተላልፋሉ	1
አንድ ወንድ ሴት ልጅን ያለማቋረጥ እያየ በሜትሮ (ሜትሮ) ምሽት ላይ ስለ አለባበሷ አስተያየቶችን ያስተላልፋል	1
ከምሽቱ ሰዓት አካባቢ በሜትሮ ሰማያዊ መስመር ራጂቭ ቾክ ተከሰተሜትሮው በጣም ተጨናንቆ ነበር እና አንድ መካከለኛ እድሜ ያለው ሰው ከማዕዘን እየወዛወዘ ነበርይህም በጣም ምቾት እንዲሰማኝ አድርጎኛል	1
አንድ ልጅ ሴት ልጅን መንገድ በጥፊ መታው	1
በሌሊት እዚያ በዝናባማ ቀናት ውስጥ በአብዛኛው እነዚህ ጉዳዮች በጣም የተለመዱ ናቸው	1
የእግረኛ መንገድ በሌለበት ታችኛው መተላለፊያ ላይ እየተራመድኩ ነበር እና አንድ ሰው ወደ ተቃራኒው አቅጣጫ ወደ እኔ ይሄዳል ወደ ታችኛው መተላለፊያ ግድግዳ ቅርብ ስለነበርኩ ያየኝ እና መንገድ ያደርግልኛል ብዬ እገምታለሁ ይልቁንም የማየት ችግር ከሌለው በቀር ድንገተኛ ሊሆን በማይችል መንገድ ወደ እኔ ይገባል እና ያለ እውቅና ቃል መሄዱን ይቀጥላል መራመዴን ቀጠልኩእና ከሁለት ሰከንድ በኋላ ወደ ኋላ ዞር ብዬ ጮኸሁበት ጥቅስ ምን እያደረግክ ነው ብለህ ታስባለህ?ጥቅስ ወደ ኋላ አልተመለሰም መሄዱን ቀጠለ እና ጨለማው ስለሆነ ቀጠልኩ እና ሌላ ምን ማድረግ እንደምችል አላውቅም እና ማንም በማይመለከትበት ጊዜ ውጊያ መምረጥ አልፈልግ…	1
አንድ ቀን እኔና ጓደኛዬ ከፓርቲ ስንመለስ በሶስት ወንዶች ልጆች ተደፍራለች ምኞቴ ሲበዛኝ በተሳካ ሁኔታ ሮጥኩ	1
አንድ አዛውንት መኪናውን አስቁመው እንድገባ ጠየቁኝ	1
በሜትሮ መስመር ላይ ቆሜ ሜትሮ እስኪመጣ እየጠበቅኩ ነበር እና በድንገት አንድ ሰው ከኋላ መጥቶ መንካት ጀመረ ወደ ኋላ በመግፋት አስቆምኩት	1
ሰዎች ገንዘቡን እና ጌጣጌጦቹን በሙሉ በባቡር ሊሳፈሩ ከነበረ ቤተሰብ ወስደዋል	1
ከሰአት በኋላ ከትምህርት ቤቴ ስመለስ አንድ ሰው በዲዲኤ መናፈሻ ውስጥ ካለ ዛፍ ጋር በኃይል አስሮኝ ነበር ሳመኝ እና አግባብ ባልሆነ መንገድ ነካኝ እና ተቃውሞአቸውን ስቆም ሸሸ በመጨረሻ ወደ ቤት መመለስ ቻልኩ ትምህርት ቤት እያሰብኩ ለቀናት ፈርቼ ነበር አሁንም ቅዠቶች አሉኝ	1
ጓደኛዬ በአጎት ቦታ የቤት ውስጥ እርዳታ ሆኖ ይሠራ ነበር ወደ ሥራ ስትሄድ ጥቂት ሰዎች እየተከተሏት አስተያየት እየሰጡባት ነበር ስለ ጉዳዩ ለአሰሪዋ አሳወቀችው ከዚያም እነዚህን ሰዎች ገጥሞ እንዲያቆሙ አደረጋቸው	1
ወደ ቤት ስመለስ የወንዶች ቡድን በፉጨት እና መጥፎ ቃላትን በመጠቀም ያንገላቱኛል	1
በዴሊ ሜትሮ ውስጥ ሰው እያሻሸብኝ ነው	1
ወንዶች ያፏጫሉ እና ድመት ይደውላሉ	1
ሰዎቹ ሆን ብለው ነክተው ሸሹ	1
ከጓደኛዬ ጋር እያለሁ ሔዋን በድዋርካ መንገድ ላይ እያሾፈች ነው	1
ፎቶ እያነሳ ነበር	1
በብስክሌት ላይ የነበሩ ሁለት ሰዎች ፊታቸው ላይ መሀረብ ይዘው በፍጥነት እየነዱ እና ልጃገረዶች ላይ ያፏጫሉ	1
በዱሼራ ፌስቲቫል ወቅት ለመሰማት ሞከርኩ	1
ከጓደኛዬ ጋር ሜትሮ ውስጥ ነበርኩ እና አንድ ወንድ ያለማቋረጥ ያፏጫል	1
በዲቲሲ አውቶቡስ (ከሻህባድ ማስታወሻ ደብተር) እየተጓዝኩ ነበር እና አንድ ሰው እንግዳ የሆነ የፊት ገጽታን እየተናገረ እና አስተያየትም ይሰጥ ነበር ከሰአት በኋላ ሆነ	1
ምሽት ላይ ኦግሊንግ የለከፈኝ	1
በአንዳንድ ወንዶች መጥፎ ባህሪ	1
ማይክሮ አውቶብስ ተጨናንቋል አንድ ሰው አውቶቡሱን ተጠቅሞ አግባብ ባልሆነ መንገድ ነካኝ	1
ከቀኑ ሰአት ላይ በረንዳዬ ላይ ቆሜ ነበርአንድ ወንድ ወደ ማህበረሰቤ ቀረበጨለማ ነበር ማንም አልወጣም አሁን ሱሪውን ልጣጭ ጀመረ ያ አሰቃቂ ገጠመኝ ነበር እና በዚያ ቀን ምን እንደሆነ ተገነዘብኩ	1
ወንዶች ልጆች ሰንሰለቴን ነጠቁ	1
ከትምህርት ቤት ስመለስ አንድ አዛውንት ተከተሉኝ እና ሰውነቴን ሊነኩ ሞከሩ	1
በአሮጌው ዴሊ የባቡር ጣቢያ	1
አውቶቡስ ውስጥ ስጓዝ ከኋላ ሆኖ አንድ ሰው አየኝ እና አውቶብስ ሲቆም ያ ሰው ወደ እኔ መጥቶ ነካኝ	1
አስተማሪ ላይ ለመንካት ሞከረ	1
በነጭ ግልጽ የትምህርት ቤት ሸሚዛችን ምክንያት የወንዶች ቡድን ስለ እኛ (እኔ እና ጓደኛዬ) አስተያየት ሰጥተዋል	1
ድመት ጥሪዎችያፏጫሉበኔታጂ ሱብሃሽ ቦታ ላይ አስተያየት መስጠት	1
ያለማቋረጥ መመልከት ለከፈኝ	1
አንድ ሰው እጁን ትከሻዬ ላይ አድርጎ ጡቴን ለመንካት ሞከረ	1
ከኮሌጅዬ እየተመለስኩ ወደ ማይቲጋር አውቶቡስ ማቆሚያ ስሄድ ልጁ መጥቶ ወደ ታፓታሊ መንገድ ጠየቀኝመንገዱን አሳየሁት እና መራመድ ጀመርኩ ግን ሰውዬው ተከተለኝ እና የግል ጥያቄዎችን ጠየቀኝ በፍጥነት ሄድኩ እና ብዙ ሰዎች ያሉበት የአውቶቡስ ማቆሚያ ደረስኩ ከዚያም ሰውዬው ከዚያ ሄደ	1
ስም ሻንጃና ማኢ ሳም ኮ ጃብ ቲዩሻን ክላስ እኔ ጃቲ ሁ ወደ ቫን ፓር ላድኬ ክዴ ሆካር አስተያየት ካርቴ ሃን	1
ይህ ክስተት የተከሰተው ከሰአት በኋላ ነው እየተነካኩ ነበር	1
በትምህርት ቤቴ ውስጥ አንድ አስተማሪ ሴት ልጆችን ምንም ነገር ባያደርጉም እና በፆታዊ ግንኙነት ቢያሰቃያቸውም ሁልጊዜ ይቀጣቸዋል	1
በእግር ስሄድ አንድ ልጅ ትኩር ብሎ አየኝና ዓይኑን ጨለመ	1
ከጓደኞቼ ጋር በባህር ዳርቻ እየተራመድኩ ነበር በድንገት ጥቂት ወንዶች ልጆች መጥተው አስተያየት ሰጡኝ	1
የወሲብ ግብዣዎች የብልት ንክኪ አምፕ ቡድን ን ያሳያል	1
ምሽት ላይ ሊነኩኝ እየሞከሩ ነበር	1
በሹክራ ባዛር አትክልት እየገዛሁ ሳለ ሁለት ሰዎች በጡቶቼ ላይ ማፏጨት እና አስተያየት መስጠት ጀመሩ ይህ የሆነው ምሽት ላይ ነው	1
ሪፈራሪ ላይ እየበላን ሳለ የሪፈክቶሪያን ፕሪፌክት ልጅ በሩ ላይ ቆማ ሳለ መብራቱ በድንገት ጠፋ አምስት ወንዶች ልጆች በጨለማ ወደ እርስዋ ሮጠው ጡቶቿን እየነኩ ነበር ለእርዳታ ጮኸች ነገር ግን የሚረዳ አካል አልነበረም መብራቶቹ እንደገና ጠፍተዋል እና ተመሳሳይ ነገር ተከሰተ	1
አንዲት ሴት በአንዳንድ ሰዎች የምታልፍበትን ክስተት አየሁ አንዳንድ ሳንቲሞችን እንደጣለች ነገር ግን ውሸት ነበር ሴትየዋ ዞር ስትል እነዚያ ሰዎች የ ዓመቷ ቆንጆ እንደሆነች ማወላወል ጀመሩ	1
ከረጅም ጊዜ ጀምሮ እርስ በርስ ሲጣመሩ የነበሩ አንድ ባልና ሚስት ግን በሃይማኖት ጉዳይ ምክንያት ወንድ ለሴት ልጅዋ አሲድ ወረወረች	1
ኮሌጅ አቅራቢያ ባለ አንድ ሰው አስተያየት ሰጠኝ	1
አንድ ሰው አጠገቤ አለፈ እና ክርኑን በጡቴ ላይ መዝረፉን አረጋገጠ ለወንዶች አንድን ሰው ለመንካት በጣም ቀልጣፋው መንገድ እንደሆነ እገምታለሁ እና ልጅቷ በትክክል ሆን ብሎ ያንን ያደረገው ኮትዲ ነው ወይንስ እያሰብኩት ነው? ቁጥር	1
በአውቶቡስ ውስጥ ስጓዝ አንድ ሰው ቂጤን ነካው	1
በድንገት እየተራመድኩ ነበር ሁለት ሶስት ሰዎች በብስክሌት ላይ አስተያየት ሰጡኝ	1
ወንዶች እና ወንዶች አስተያየት ይሰጣሉ እና ሁሉም ብዙውን ጊዜ	1
ወደ ሱቁ እየሄድኩ ሳለ አንዳንድ የአደንዛዥ ዕፅ አዘዋዋሪዎች ቀስ ብለው እየተከተሉ ጀርባዬ ላይ ሳሉ አብሬው ወደ ቤቱ ካልሄድኩ በቦታው ይገድለኛል ብሎ በፍጥነት ሮጥኩኝ	1
ሚኒ ቀሚስ ለብሳ የምታልፍ ልጅ ከወንዶች ቡድን ጋር በፉጨት እያፏጨች ነበር እና አለባበሷን በተመለከተ አስተያየት መስጠት ጀመሩ	1
በእኔ ላይ አስተያየት እና ቆሻሻ እይታ ተጭኗል ከምሽቱ ሰዓት ላይ ተከስቷል	1
አንዳንድ ወንዶች በፀጉር አስተካካያቸው የሚያልፉ አንዳንድ ልጃገረዶችን ይመለከቱ ነበር ልጃገረዶቹ በጭንቀት ተውጠው ሲመለከቱወንዶቹ ማፏጨትማፏጨት እና አስተያየት መስጠት ጀመሩ ልጃገረዶቹን ከሚያስጨንቃቸው ወንድ ልጆች አንዱ ክስተቱን ስመለከት ያዘኝ ከዚያም ዓይኑን ደበደበኝ እና ዝም ብዬ ዞር አልኩ	1
ጠዋት ላይ በዲቲሲ አውቶቡስ ውስጥ ነበርኩ እና አንድ ወንድ የሴቶች መቀመጫ ስለሆነ እንድቀመጥ ጠየቅኩት ነገር ግን ሴሰኛ አስተያየቶችን ማስተላለፍ ጀመረ እና ሹፌር እና መሪ እንኳን ምንም አልተናገሩለትም	1
አንድ ሰካራም ወደ ጓደኛዬ መጣን እና እኔ ወደ ኮሌጅ ስንሄድ እና በትክክል አስተያየት መስጠት ጀመርን	1
ወደ ትምህርት ቤቴ የሚወስደው መንገድ ከሆነ ጀምሮ ወደዚያ እየሄድኩ ነው ብዙ ጊዜ እንደዚህ አይነት እይታዎችፉጨት ወዘተ አጋጥሞኛል	1
አስተያየቶች ያለማቋረጥ ይተላለፉ ነበር በ ምሽት ላይ ተከስቷል	1
ከጣቢያው ወደ በሚሄዱበት ጊዜ ጥቂት ወንዶች ሴሞሚንግ ነበሩ	1
አስተያየት ሲሰጥጨዋነት የጎደለው መጋለጥ እና መንካትመጎተት ምሽት ላይ ከ ወደ እኔ ቦታ በአውቶቡስ ውስጥ ተከሰተ አውቶቡስ ውስጥ ነበርኩሰውዬው መጣ እና ይህ ሆነ	1
በመኪናው ውስጥ የሰከሩ ሰዎች በመንገድ ላይ ተከተሉኝ	1
ሁለት ሰዎች የኛን (የጓደኛዬን) ፎቶ በድብቅ እያነሱ እና እንዲሁም ፊሽካ እየነፉ ነበር	1
ምሽት ላይ ሁሉም የመንገድ አቅራቢዎች ርካሽ አስተያየቶችን ያስተላልፋሉ	1
የብልግና ባህሪ ተገዥ ነበርኩ	1
ከእናቴ ጋር መንገዱን እያቋረጥኩ ነበር እና ሰዎች አስተያየት አለፉብስክሌቱ ላይ ጠበቁመልክውን ሰጡን እና ሄዱ	1
በካሽሚር በር የሚገኘውን ሜትሮ እየጠበቅኩ ነበር እና የወንዶች ቡድን አስተያየት መስጠት ጀመሩ እና እንግዳ በሆነ መንገድ ባህሪ ያሳዩ ነበር በጣም አሳፋሪ ነበር	1
በኤምጂ ሮድ ከቢሮ ሰአታት በኋላ ታክሲ ለመውሰድ ለሚጠባበቁ ልጃገረዶች የወሲብ ግብዣ የሌዘር መብራቶችን በመጫወት ላይ ያሉ ጨዋነት የጎደላቸው ኮከቦች	1
በዲሲ ቢሮ መሬት ላይ ተቀምጬ ነበር እና የቡድን ኤፍ ሰዎችም እዚያ ተቀምጠዋል እያደረጉት ያለው ነገር ቢኖር አላፊ አግዳሚዎችን እያዩ እና ለእነሱ በተለይም ለሴቶች የተለያዩ ንግግሮችን ማድረግ ብቻ ነው	1
ሪክሾን ከእኔ ጋር ለመካፈል የሚሞክሩ ሁለት ሰዎች መውጫው ላይ መቀመጥ እፈልጋለሁ ብዬ ስናገር ሰዎቹ አጠገቤ መቀመጥ እንፈልጋለን ማለት ጀመሩ ደስ የሚለው ነገር የመኪና አሽከርካሪው በአውቶ ላይ እንዲሳፈሩ አልፈቀደላቸውም	1
በዲቲሲ አውቶቡስ () ውስጥ ወደ ድዋርካ ሰከንድ በሚመለስበት መንገድ ላይ የአምፕ መጥፎ የፊት መግለጫዎችን መንካት አስተያየት መስጠት	1
የኩሽና ዕቃዎችን የሚሸጡ አንዳንድ ወንዶች ን የሚገልጽ አስቂኝ ቋንቋ መጠቀም ሲጀምሩ አጭር አናት ለብሳ የነበረች ሴት እያለፈች ነበር	1
የከባድ መኪና ሹፌር ሚራ መንገድ ላይ ነክቶኛል ወይም ወሲባዊ ጥቃት ሊፈጽምኝ ሞከረ በየቀኑ ማለት ይቻላል ትንኮሳን እንመሰክራለንይህ የሆነው በታኩር ሞል ፊት ለፊት ባለው አውራ ጎዳና ላይ በዳሂሳር ሀይዌይ ሚራ ራድ ነው	1
አንዴ ጣቴን ከወንጀለኛው ጋር አጣበቅኩት በስድብ እና በቆሸሸ ምልክት ሲሰድበኝ እና ያኔ ነበር በቡጢ የተደበደብኩትለፖሊስ ሪፖርት አድርጌያለሁ	1
በአውቶቡስ ፌርማታ ላይ ቆሞ አንድ ሰው ፎቶግራፎችን ጠቅ እያደረገ ነበር እና አንድ ቀን አንድ የመኪና ዋላ ወደ አንድ መጥፎ ቦታ ሊወስደኝ ሞከረ	1
መንገድ ላይ እየሄድኩ ሳለ ሁለት በብስክሌት ላይ የተሳፈሩ ሰዎች ሊያስፈሩኝ ከፊቴ ቆመውሳቁብኝ እና አለቁኝ	1
የ ዓመቷ ልጅ በትምህርት ቤት ግቢ ውስጥ ተደፍራለችየወላጆቿን ፍላጎት በመቃወም በምሽት በትምህርት ቤት ድግስ ላይ ተገኝታለች እና በተቀላቀለችበት ወቅት ገንዘቧን የጠየቁ እና በኃይል የደፈሩ አራት ሰዎች ያዙት	1
ሁለት ወንድ ልጆች በአጠገባችን ሳለን አስተያየት ሰጥተዋል ከሰአት በኋላ ሆነ ውሾቹ ይጮኻሉ!	1
በ ሻስትሪ ናጋር የ ዓመቷ ትንሽ ልጅ በሱቅ ተደፍራለች	1
በእግር ስንሄድ ጥቂት ወንዶች በሴት ጓደኛዬ ምስል ላይ አስተያየት ሲሰጡ አየሁ	1
የወንዶች ቡድን መጀመሪያ ተጎጂውን አሳደዳት እና እድል ሲያገኙ ለእሷ አሳፋሪ የሆኑ አስተያየቶችን ሰጡ	1
ከፊልም አዳራሽ ውጭ ባሉ ብዙ ሰዎቼ ላይ አስተያየት ተሰጥቶኝ ነበር ፊልሙን ሳያይ ሄድኩ	1
ብዙ ጊዜ አጸያፊ አስተያየቶች እና ጥሪዎች ገጥሟቸዋል	1
አካባቢው በሌሊት በጣም ብቸኝነት ይሰማዋል እና ወንዶች እዚያ ሊያጨሱ ይመጣሉ እና በአጠገቡ የሚሄደውን ሁሉ ይመለከታሉ	1
ምሽት ላይተከታታይ አስተያየቶች ነበሩ (	1
የወሲብ ግብዣዎችየማታለል አስተያየቶችን ማለፍ	1
ከትምህርት ቤት ወደ ቤት ስመለስ ነበር በመንገድ ላይ ያሉ አንዳንድ ወንዶች ልጆች አይተውኝ እና አስተያየት መስጠት እና ማፏጨት ሲጀምሩ እንዲሁም የፊት ገጽታን አስፈሪ አድርገው ይገልጹ ነበር	1
በብስክሌት ላይ ነበሩ እና ወደ ቤት ስመለስ በሪክሾ ላይ ነበርኩ እና ተመለከቱኝ እና መጥፎ አስተያየት ሰጡኝ	1
ትምህርት ቤት ነበርኩ እና ወደ ክፍል ስሄድ አንድ ልጅ እጄን ያዘ እና ማቆም ነበረብኝ እና የሚከፍለው አስደናቂ አካል እንዳለኝ ነገረኝ	1
ብዙውን ጊዜ በምሽት የምጓዘው በሜትሮ አምፕ እነዚህ ሰዎች እየመጡ ነው አምፕ ማፏጨት ይጀምራል ችላ እላለሁ	1
አንድ ሰው መኪናውን አቁሞ አስተያየት ሰጥቷል	1
ዕድሜ ዓመት የትንኮሳ አይነት በቾግላምሳር (ሌህ) (ምሽት) የድመት ጥሪዎች በቾግላምሳርሌህ ገበያ እና ትምህርት ቤት በሌህ (በምሽት ሰዓት) በትምህርት ቤት እና በሌህ ገበያ አስተያየት መስጠት (በቀን ሰዓት) በትምህርት ቤት (በቀን ሰዓት) በ (ምሽት) የወሲብ ግብዣዎች ሌሎች ስልክ ቁጥር (የቀን ሰዓት) ይጠይቃሉ	1
ይህ ክስተት የተከሰተው ከሰአት በኋላ በሜትሮ ጣቢያ ነው ወደ ቤቴ እየሄድኩ ነበር እና አንዳንድ ወንዶች ልጆች አስተያየት መስጠት ጀመሩ	1
ከምቆይበት ሚቴ እየተራመድኩ ነበርከቀኑ ሰአት ላይበዶላር አቀማመጥ ኛ ምዕራፍ እና በብስክሌት ላይ ያለ አንድ ሰው የራስ ቁር የለበሰ ሰው ከኋላዬ መታኝ (አንኳኳኝ) እና ከዚያም ደረቱ ውስጥ አስገባኝ እና ተፋጠነ በዚያ ቀን ዝናብ እየዘነበ ስለነበርየብስክሌት ቁጥሩን ወይም አሠራሩን በትክክል መያዝ አልቻልኩምበተመሳሳይ ሁኔታ በአካባቢያዬ እንደዚህ አይነት ስራዎችን የሚሰሩ ወንዶች አሉ ምክንያቱም አብሮኝ የሚኖረው ጓደኛዬ ከቀኑ ሰአት ላይ ተመሳሳይ ችግር ስላጋጠመው ነው እነዚህ ጎዳናዎች ከምሽቱ ሰአት ላይ እንኳን ሱፐር ስቶርን ስትጎበኙጓደኛዬ አንድ ቀን ቀን ዙሮች ሲያደርግ ለፖሊስ ቫን ነገረው ነገር ግን ደኅንነቱ አሁንም በጣም …	1
አስተያየት መስጠት	1
በጋራ አውቶሪክሾ ውስጥ ነበርኩ አጠገቤ የተቀመጠው ሰው ሆዴን በክርን ሊጭንኝ እየሞከረ ነበር በኋላ እጁን ከጭኔ በታች ለመንሸራተት ሞከረ እጁን ወስዶ ፊት ለፊት እንዲቀመጥ ነገርኩት	1
እናቴ ውሻዬን ለእግር ጉዞ ስታወጣ በአንድ ሰው ተከትላ ጾታዊ ትንኮሳ ደረሰባት	1
ማታ ላይፊልም ለማየት ሄድንከዚያ ሰካራሞች እና ብዙ የመንገድ ዳር ሻጮች ለመንካት እየሞከሩ አስተያየት እየሰጡ ነበር የሚያበሳጭ በአውቶቡስ ማቆሚያ ላይ አንድ ፖሊስ ጠየቅን	1
በማለዳው በወንዶች ቡድን በጣም ተሳለቅኩ እና ተገፍቻለሁ	1
ወደ ትምህርቴ የምሄደው በፓርኩ መንገድ ነበር እና አንዳንድ የወንዶች ቡድን እንድቀጥል አልፈቀዱልኝም እና ቆሻሻ አስተያየቶችን እና ፊሽካዎችን እያስተላለፉ ነበር	1
እህቴ ከትምህርት ቤት ወደ ቤቷ ስትመለስ ሁለት ወንዶች ልጆች ተከተሏት ያፏጫሉ እና መጥፎ ቃላትን ይናገሩላት ነበር	1
አስተያየት የሰጠሁት ከሰአት በኋላ ነበር	1
አንድ ሰካራም በአካባቢው በሚንቀሳቀስ ባቡር ውስጥ ለማዋከብ ሞከረ	1
አንድ ጓደኛዬ በባህር ዳርቻ ላይ ወሲባዊ ትንኮሳ ደርሶበታል	1
አንድ ቀን አንዲት ልጅ እየተራመደች ነበር እና ሁለት ወንዶች ልጆች እሷን ማሾፍ ጀመሩ አቅመ ቢስ ሆኖ ስለተሰማት እያለቀሰች ነበር ነገር ግን ወንዶቹ ማሾፍ አላቆሙም	1
ወንድ ልጅ መጥፎ ባህሪ	1
በመንገዴ ላይ እየተራመድኩ ነበር እና ሁለት ወንዶች ልጆች በመንገድ ላይ ብቻዋን ስትራመድ ለአንዲት ልጅ ሲያፏጩ እና አስተያየት ሲሰጡ አየሁ	1
አንድ ጊዜ ከቢሮ ወደ ቤቴ ስመለስ አንድ ሰው በእቅፉ ሊነካኝ ሞከረ	1
አንዳንድ ልጃገረዶች እያሾፉኝ ነበር እና ምቾት ተሰማኝ	1
አንዳንድ ወንዶች ልጅ ስለ ሜካፕዋ እና አለባበሷ ሲያሾፉ አየሁ በኋላም አንዳንድ ተገቢ ያልሆኑ አስተያየቶችን ሰጥተዋል	1
ይህ ቦታ በማሂላ ኮሌጅ እና የሴቶች ሁለተኛ ደረጃ ትምህርት ቤት መንገድ ላይ ነው ልጃገረዶች ይህንን ቦታ (አሽራም ቾክ) ሲያቋርጡ ችግር እያጋጠማቸው ነው	1
ይህ ክስተት የተከሰተው ምሽት ላይ ከቀኑ ሰዓት አካባቢ ነው አንዳንድ ሰዎች ከኮሌጅ አውቶቡስ ስትወርድ እና ብልግና አስተያየቶችን ስትሰጥ እህትን መከተል ጀመሩ	1
መንገድ ላይ እየተራመድኩ ነበር እና እነዚህ ሰዎች በብስክሌት ጉዞ ላይ አለፉ አንደኛው ያፏጫል ሌላኛው ደግሞ ዘፈን መዘመር ጀመረ በመንገድ ላይ ከአጎቴ ልጅ እህቴ ጋር ነበርኩ	1
ከጓደኛዬ ጋር በነበርኩበት ምሽት በ አቅራቢያ ባሉ የወንዶች ቡድን አስተያየት መስጠት	1
ሞሞስ ሊኖረኝ ሄጄ ነበር እና አንድ ወንድ ሴት ልጅን በጣም ርካሽ በሆኑ ቃላት በጣም ሲወቅስ በጣም መጥፎ ገጠመኝ ነበር	1
ስለ ሰውነቴ በጣም ርካሽ አስተያየቶች ተላልፈዋል	1
ጓደኞቼ ወደ ቤቴ እየመጡ ነበር በመንገድ ላይ ተሳለቁባቸው እና እስከ ቤቴ ድረስ ተከተሉት	1
ሰንሰለት መንጠቅ ተከሰተ እና ሔዋን እያሾፈች ነው	1
ክፍል ከጨረስኩ በኋላ ወደ ቤቴ እየሄድኩ ነበር አስተያየቶችን አሳልፈው በእነሱ ውስጥ እያለፉ ያፏጩኝ አንዳንድ ወንዶች ነበሩ	1
በቆሸሸ መንገድ ትኩር ብዬ ተመለከትኩኝእንዲሁም አንዳንድ አስተያየቶች ተላልፈዋል	1
አንዳንድ የጎዳና ተዳዳሪዎች ጎረቤቴን በምሽት አትክልት ለመግዛት ስትወጣ አሳዝኗታል	1
እየተራመደ ነበር የባቡር ድልድዩን ወደ ካምቢ ሙሩ አለፈ እና አንድ ሰው ሁለት ጊዜ በፉጨት ጮኸኝ ምላሽ አልሰጠሁም እና ሴትየዋን በሀምራዊ ቀለም ጮኸች እና ጥሩ እግሮች አሉህ ሚስቴ በመሆኔ አደንቃችኋለሁ	1
በመጥፎ ዓላማ መንካት	1
በሳትያ ድልድይ እየተሻገርኩ ነበርአንድ ልጅ ጠርቶ ማስተርቤሽን እና የፆታ ግንኙነት እየጋበዘ ነበር	1
ከሰዓት በኋላ ስለ ልጃገረዶች አስተያየት መስጠት	1
ሴት ልጅ በወንዶች ተበድላለች	1
በትምህርት ቤታችን አውቶብስ ውስጥ ነበር እኔና ጓደኛዬ ከትምህርት በኋላ የትምህርት ቤቱን አውቶብስ ተጠቅማ ወደ ቤት ስትሄድ መሪው መጥፎ ቃላትን ተጠቅሞ ማሾፍ ሲጀምር ከመምህራችን ጋር ከማጉረምረም ይልቅ	1
እህቴ ምሽት ላይ ወደ ትምህርት ቤት ስትሄድ በሁለት ወንዶች ልጆች ታግላለች የጎዳና መብራቶች እየሰሩ ስላልነበሩ ማንነታቸውን ማየት ስላልቻለች ግን አስፈራት አሁን ጣልኳት	1
የወንዶች ቡድን አስተያየት ሲሰጥ እና ሲጮህ	1
መኪና ልጅቷን ተከትላ በህገወጥ አስተያየቶች እና ጨዋነት የጎደለው ድርጊት ስትጋብዝ	1
ስኩቲ እየጋልብኩ ነበር ሁለት ብስክሌቶችን የለበሱ ሁለት ሰዎች በስኩቲ ተከትለውኝ እና ለመሳፈር በሚረብሽ ተሳለቁብኝ	1
ከቡና ቤት ውጭ የተቀመጡ የወንዶች ቡድን አንዲት ወጣት ሴት በአጠገቧ እያለፈች ኮትዳርሊንግኮት ብለው ይጠሩ ነበርልጃገረዷ በጽሑፍ (ዳርሊንግ) ላይ ቲሸርት ነበራት	1
ክስተቱ የተከሰተው ከ ከተማ ውጭ ነው እኔና ጓደኛዬ በብስክሌት ላይ ነበርን እና ከቤቷ ውጭ ካለው የኮሌጅ ጓደኛችን ከአንዱ ጋር እየተነጋገርን ሳለ ታክሲ ቆመ ዕንቁ ነጭ ታታ ኢንዲካ ቪስታ () ነበር) ሹፌሩ ጓደኛችንን ማሾፍ ጀመረ እና እሱን ስናይ እኛንም ማጎሳቆል ጀመረ በመንገድ ላይ ውጊያ ለመምረጥ አስቦ ነበር ነገር ግን የተሽከርካሪውን ቁጥር በጸጥታ አስተውለን ሪፖርት ለማድረግ መረጥን በመኪናው ውስጥ ሌሎች ሁለት ነበሩት ከክስተቱ በኋላ ወደ ዬሽዋንትፑር ሄዶ ወደ ሜትሮ ሄደ	1
ከጣቢያው ውጭ እና መድረክ ላይ የሚንከራተቱ የወንዶች ቡድን አስተያየቶችን በማለፍ	1
እንደተለመደው ወደ ሆስቴሌ ተመለስኩ እና አንዳንድ የአካባቢው ሰዎች ቻይንኛ ብለው ጠሩኝ	1
አውቶቡስ ፌርማታ ላይ ከእህቴ ጋር ቆሜ አውቶቡስ እየጠበቅኩ ነበር እና ሁለት ሰዎች መኪና ውስጥ ገቡ እና በመኪናቸው ውስጥ እየጋበዙን ነበር እና ብልግና አስተያየቶች ነበሩ	1
ከእህቴ ቤት ወደ ቤት ስመለስ የወንዶች ቡድን ገጠመኝያፏጫሉ እና አስተያየት ይሰጡኝ ጀመር እያየኋቸው በጥድፊያ ወደ ቤቴ ሄድኩ	1
ከጓደኛዬ ቤት ወደ ቤቴ ዘግይቼ ነበር አንዳንድ ወንዶች ልጆች ጠጠሮችን እየወረወሩ ያሾፉብኝ	1
ይህ ክስተት የተካሄደው እኤአ ህዳር ቀን ምሽት አካባቢ ነው በፖስታ ላይ የቆሙ ሁለት ሰዎች ያፏጫሉ እና አስተያየቶችን ያስተላልፋሉ	1
አንዳንድ ሰዎች በሜትሮ ውስጥ አስተያየት እየሰጡ እና ተገቢ ያልሆነ መግለጫ እየሰጡ ነበር	1
አስተያየት መስጠት ድመት ያፏጫል ማሽኮርመም የፊት መግለጫዎች	1
ከጓደኛዬ ጋር ወደዚህ ካፌ እየሄድኩ ነበር እና አንድ ሰው ወደ እኛ የሚያመለክት የቦሊውድ ዘፈን መዘመር ጀመረ	1
ወደ ኮሌጅ እያመራሁ ሳለ አንድ ያገባ ሰው ተቀምጦልኝ የሰውነቴን ስሱ የአካል ክፍሎቼን ነካ መጀመሪያ ላይ ችላ አልኩት ነገር ግን ድርጊቱ ሲደጋገም እንዲያቆም ጠየቅኩት	1
አንድ ቦ እና ጓደኞቹ ሁል ጊዜ አስተያየቶችን እንደ ኮታባሂኮት እና በጣም የሚያናድድ አድርገው ያስተላልፉኛል	1
በዳና ፓኒ ቢች አቅራቢያ ወደሚገኝ የጓደኛ ቦታ ከጎበኘሁ በኋላ እየተመለስኩ ነበር ጥቂት ወንዶች ልጆች ዘፈኖችን መዘመር ጀመሩ ይህም በጣም ምቾት እንድፈጥር አድርጎኛል	1
የእሱ ክስተት በታጅ ላንድ መጨረሻ የቡና መሸጫ ሱቅ ውስጥ ደረሰብኝ ምሽት ላይ ከሴቭ ላይፍ ፋውንዴሽን መስራች ጋር እየተገናኘሁ ነበር እና በቁም ነገር ውይይት ላይ ነበርን አንድ ሰው ወደ እኛ መጥቶ መጀመሪያ ለባልደረባዬ ሲመኝ ነበር ከዚያም ወደ እኔ ዞረ እና አንድ ነገር ተናገረ ይህ ሰው እርስዎን በጣም ጥሩ ነው ምላሽ ከመስጠቴ በፊት እሱ ጠፍቷል አስተናጋጁን ደውለን ባለ ኮከብ ሆቴል ውስጥ እንዴት ያለ ነገር ሊከሰት እንደሚችል ጠየቅን ይህም ቦታ ሴፌኮት ቦታ ነው ተብሎ ይታሰባል ሰክሮ ነበር እና ለተወሰነ ጊዜ ተንጠልጥሎ እንደነበር ተናግረዋል በጥያቄ ውስጥ ካለው ሆቴል ጋር እየተነጋገርኩ ነው ስለ አሠራራቸው እና ደንበኞቻቸ…	1
ከአዛውንቶች አንዱ በሁለተኛው የኮሌጅ ቀናችን ከቡድኑ ጋር ወደ እኛ መጣ እና ያለ ምንም ምክንያት እኛን ማጎሳቆል ጀመረ	1
አንዲት ልጅ በቡድን እየተሰቃየች ነበር እና ምንም ማለት አልቻለችም	1
አንዳንድ ሰዎች ከእኔ ጋር መጥፎ ባህሪ ነበራቸው	1
ከጎኑ እያሳደደ እና እየነዳ ነበርእንደ ስምአይሆንምቤትወዘተ የመሳሰሉ የግል መረጃዎችን ይጠይቅ ነበር	1
በዚህ አካባቢ የህዝብ መኪና ውስጥ ብዙ ጊዜ በግል አካላት ዙሪያ መንካት አላስፈላጊ ሆኖ ተሰማኝ ስለዚህበሕዝብ መኪና ውስጥ ምቾት አይሰማኝም	1
ወደ ትምህርት ቤት ሲሄዱ ማሾፍ እና ከትምህርት ቤት ሲመለሱ ከአካባቢው የ አካባቢ ወንዶች	1
በካያላኒው ዴሊ አስተያየት መስጠት	1
ያጋጠሙኝ ብዙ አጋጣሚዎች አሉ ነገርግን እዚህ መጻፍ የምፈልገው ከአንድ አመት በፊት የ አመት ልጅ የሆነች ልጅ በጎረቤቷ የተደፈረች እና ወላጆቿ ህክምና ወደምወስድበት ሆስፒታል ወሰዷት	1
ወደ ትምህርት ቤት ስሄድ አንድ ሰው አውቶቡስ ውስጥ እያለሁ ያሾፍብኝ ጀመር	1
እኛ ህንዳውያን ብንሆንም ቻይናውያን አሉ እያሉ ጥቂት ልጃገረዶች እና ወንዶች ልጆች እርስ በርሳቸው እየተነጋገሩ ነበር	1
አንድ ጓደኛዬ በአንዳንድ የታመመ ሰው ተቧድኖ በሰውነቷ ላይ ጸያፍ አስተያየት እየሰጠች ነበር	1
አንድ የተሳሳተ ደዋይ በመጥፎ እየወሰደ ነው በሚል ከአንድ ወር ተሠቃየሁወይ ተከተለኝ የኩባንያዬ ቁጥር ነውነገር ግን ን አትከታተልም እርዳኝ ለዚያ ሰው ተጨነቀኝ ይላል	1
ወደ ቤት ስመለስ ያፏጫልኝ ልጅ አገኘሁት እና ችላ አልኩት እና ስድብ ጀመረኝ	1
እነዚህ የታጅ ክሪሽና እራሱ ሰራተኞች ናቸው! እኔና ባለቤቴ ለ ሳምንት ያህል እዚያ ቆየን እና እኔ ሙሉ በሙሉ የተሸፈኑ ልብሶችን ለብሼ ነበር እና ያ ቢሆንም!	1
አንድ ቀን እኔ እና ጓደኛዬ ከትምህርት ቤት ወደ ቤት እየሄድን ነበር ሁለታችንም ብቻችንን ነበርን እና ጥቂት ወንዶች ልጆች መንገድ ላይ ቆመው ነበር እና መጥፎ አስተያየት ሰጡ ይህም በጣም አስቂኝ ነበር	1
አንዳንድ ሰዎች እያፏጩ እና ልቅ አስተያየቶችን ሲያስተላልፉ	1
የ አመት ወንድ ልጆች በእኔ እና በጓደኞቼ ላይ ቆሻሻ አስተያየቶችን እየሰጡ ነበር	1
ከጓደኛዬ ጋር እየተራመድኩ ነበር እና ሁለታችንም ተሳለቀብን	1
ድመት ጥሪዎች ምሽት ላይ አስተያየት	1
በስፖሂያ ኮሌጅ እማራለሁ ከፔደር መንገድ በር ወደ ኮሌጁ መግባት ነበረብኝ ነገር ግን መታወቂያ ካርዴ ስላልነበረኝ ከፔደር መንገድ ወደ ዋናው በር መሄድ ነበረብኝ በብስክሌት ላይ አንድ ሰው እየሄድኩ ሳለ (የራስ ቁር ለብሼ ፊቱን አላየሁም) በእኔ እና በጓደኛዬ በኩል እያለፉ ነበር (ወደ ጎኑ ነበርኩ) ሰውነታችሁን እወዳለሁ አለ በጣም ጥሩ ረጅም የህንድ ኩርቲ ለብሼ ነበር ነገርግን ከአስተያየቱ በኋላ በጣም ተጸየፈኝ ምላሽ መስጠት አልቻልኩም ምክንያቱም ደነገጥኩ እንዲህ ዓይነቱ ክስተት ከእኔ ጋር ለመጀመሪያ ጊዜ ተከስቷል	1
የልጃገረዶች ቡድን ከትምህርት ቤት እያለፉ ነበር የተወሰኑ ወንዶች ልጆች ይደውሉላቸው ጀመር ነገር ግን ልጃገረዶቹ ወደ ኋላ መለስ ብለው አላዩም ከዚያም ወንዶቹ ቅርጽ የሌላቸው ናቸው ብለው ያጎሳቆሉዋቸው ጀመር	1
ከኮሌጅ እየተመለስኩ ሳለ የወንዶች ቡድን መጥፎ ቃላትን በመናገር ብዙ ያሾፉብኝ ነበር	1
ወንዶች ልጆች ብዙውን ጊዜ በዚህ ቦታ ይንከራተታሉ እና በሴቶች ላይ መጥፎ አስተያየቶችን ያስተላልፋሉ ያፏጫሉ ወዘተ	1
አውቶቡስ ጨዋነት የጎደለው መጋለጥመንካት እና መነቃቃት አጋጥሞኛል	1
ከምሽቱ ሰአት አካባቢ በአውቶቡስ ማቆሚያ ላይ ቆሜ ወንዶች ቆመው አስተያየት እየሰጡ ነበርችላ አልኩ	1
አንድ ወንድ ከሰአት በኋላ በሜትሮ አጠቃላይ አሰልጣኝ ውስጥ በአንዲት ልጅ ላይ ያለማቋረጥ አስተያየት ይሰጥ ነበር	1
አንዳንድ ሰዎች በእኔ እና በጓደኞቼ ላይ አስተያየት ይሰጡ ነበር	1
ከትምህርት ቤት ወደ ቤት ስትወጣ ሁሉንም ስሞች ትጠራ ነበር ስሞች እንደ ቆንጆ	1
አንዳንድ ልጃገረዶች ከወንዶች ቡድን አጠገብ ግዢን ያልፉ ነበር ከዚያም እነዚያ ሰዎች ይደውሉላቸው ጀመር ነገር ግን እነዚያ ልጃገረዶች ምንም ትኩረት አልሰጡላቸውም እና እነዚያ ሰዎች ርካሽ ሴት ልጆች እንደሆኑ ነገሯቸው	1
ከጓደኛዬ ጋር ገበያ ላይ ነበርኩአንዳንድ ወንዶች ልጆች እያዩብን እና አስተያየት መስጠት ሲጀምሩ ወዘተ	1
በባቡር መስመር ላይ ሁል ጊዜ የሚቀመጡ የወንዶች ቡድን ስሜን ጠርተው እንዲያፏጩኝ ሲጠብቁኝ አስተውያለሁ	1
እኔን እና ጓደኞቼን የሚያሾፉኝ የወንዶች ቡድን ነበር የተለያዩ አስተያየቶችን ያስተላልፋሉ	1
እኤአ በሴፕቴምበር በወንዶች ልጆች መጥፎ አስተያየት የመስጠት ክስተት በማሃራኒ ባግ ውስጥ ከእኔ ጋር ተከሰተ	1
ወንዶች ልጆች ከካምላ ናጋር እስከ ሆስቴሌ ድረስ ተከተሉኝእያፏጩ እና እያጠፉ ነው እንዲሄዱ ነገርኳቸው እና ያ የበለጠ ተሳዳቢ አደረጋቸው ዝም ብዬ ችላ አልኩ እና በፍጥነት ሄድኩ	1
አንድ የመኪና ሹፌር ከጓደኛዬ አንዱን ለማዋከብ እየሞከረ ነበር የሔዋን ቲሴሮች ቁጥር እየጨመረ ነው	1
በአቅራቢያው በሚያልፈው የሴት ልጅ ቀሚስ ላይ ወንዶች አስጸያፊ አስተያየቶችን ያስተላልፋሉ ምሽት ላይ በሜትሮ (ሲፒ) ውስጥ ተካሂዷል	1
አንዳንድ ሰዎች ጸያፍ አስተያየቶችን ማለፍ ሲጀምሩ በመንገድ ላይ ሳልፍ ነበር	1
አንድ ጊዜ ወደ ቤት ስመለስ አንድ ያልታወቀ ሰው ተከተለኝ በጣም አስፈሪ ነበር	1
ሰዎች ነካ እና አስተያየት ሰጥተዋል	1
ምሽት እና ማታ በሜትሮ ውስጥ ይከሰታል	1
ከኮሌጅ ሲመለሱ የወንዶች ቡድን አስተያየት መስጠት እና ጸያፍ መግለጫዎችን መስጠት ጀመሩ	1
በመውጫው በር ላይ በሚገኘው ኢንደርሎክ ሜትሮ ጣቢያ እየጠበቅኩ ነበር አራት ወንዶች ልጆች ያሉት ቡድን ርካሽ አስተያየቶችን አልፈው ተከተሉኝ ፖሊስ ሲያዩ ዘወር ብለው ሸሹ	1
እኔና ጓደኛዬ በሦስት ሰዎች ተሳለቁብንበፉጨት ያፏጩብናል እንዲሁም አንደበትን በመጠቀም እንግዳ ድምፅ አሰሙ	1
ወንዶች አስተያየት ሲሰጡ እና እያሳደዱ	1
እኔና ጓደኛዬ በሌሊት ወደ ቤት ተመለስን እና በፓንቬል ባር ውጭ ያሉ አንዳንድ ሰዎች አስተያየት ሰጥተው ያፏጫሉ	1
እኔና ጓደኛዬ በመንገድ ላይ ስንሄድ በብስክሌት ላይ የነበሩ ሁለት ሰዎች አጠገባችን ዘገዩየጓደኛዬን ጡቶች ይዘን በፍጥነት ሄድን ምላሽ ለመስጠት ወይም ለማጉረምረም ጊዜ እንኳን አላገኘንም የተጨናነቀ ቦታ ነበር ግን ይህን ለማድረግ ደፈሩ	1
በራክሻም ኒላያም አቅራቢያ በምትገኝ የሴቶች ላት ምሽት ላይ አስተያየት ሲሰጡ ከነበሩት ሰዎች መካከል ጥቂቶቹ ተገኝተዋል	1
ይህ ክስተት የተፈፀመው እኤአ ሴፕቴምበር ቀን ከቀኑ ሰአት አካባቢ በፓሲፊክ ሞል አቅራቢያ በሚገኘው ካያላ ነው በዚያ አካባቢ ሳልፍ አንዳንድ ወንዶች ልጆች ሲያፏጩ እና አንዲት ልጅ ስታልፍ አስተያየት ሲሰጡ አየሁ	1
ከአራት ጓደኞቼ ጋር ወደ እኔ ተቀምጠው የፊልም ግራንድ ማስቲ ወንድ ልጆች አንዳንድ ወሲባዊ ድምጾችን እየሰሩ እና እያዘናጉኝ እና እንዲሁም አስተያየት ሲሰጡኝ ለማየት ስሄድ ክራባት ነበር	1
የሰንሰለት ዘረፋ አይቻለሁ	1
በአሮጌው ምሽግ አቅራቢያ እና በአሮጌው ዴሊ ሜትሮ ጣቢያ አቅራቢያ ያሉ ሰዎች እነዚህን መጥፎ ተግባራት ያከናውናሉ	1
ከ ጓደኞቼ ጋር ነበርኩ እና አንዳንድ ሰዎች ስለእኛ አስተያየት ሰጡ እና ጨዋነት የጎደለው ምልክቶችን አድርገዋል	1
በዲዳ ፓርክ ከትምህርት ቤት ወደ ቤት እየተመለስኩ ነበር እዚያ የተቀመጡ ወንዶች ልጆች ይስቃሉኝ እና አስተያየቶችን ያስተላልፋሉ አልፎ ተርፎም ወሲባዊ ግብዣ ያደርጉ ነበር	1
ዝናብ እየዘነበ ነበር እና ወደ ቤት እየሄድኩ ነበር እና ሰዎች ዝናብ ሲዘንብ ጥሩ መስሎኝ ነበር እና ወደ ተርሚኑስ ከመድረሳችሁ በፊት በጥላው ላይ ቆመው ነበር እያሉ ያወሩ ነበር	1
ከትምህርት ቤት ወደ ቤት ስንሄድ የወንዶች ቡድን ለእኔ እና ለጓደኛዬ አስተያየት ይሰጡኝ ነበር ለድርጊታቸው ምላሽ ስንሰጥ ከእኛ ጋር መወያየት ጀመሩ መጥፎ ቃላትን እየተጠቀሙ ነበር	1
ከማያውቀው ሰው አጠገብ አግዳሚ ወንበር ላይ ተቀምጦ ከሄደ በኋላ ሰውዬው ተሰናበተ ከዚያም በኋላ ሊያየኝ ተስፋ አድርጎ ነበርከዚያም ብዙም ሳይቆይ ሊያየኝ ተስፋ አድርጎ ነበርከዚያም ይህን ጥቅስ ይጮኻል እና አስጸያፊ ድምፆችን ተናገረ	1
በኢንዲራ ናጋር አቅራቢያ መሬቱን ስታልፍ አስተያየቶች እየተሰጡ ነበር እና ተገረምኩ	1
ሰራተኛ ሴት ነች የተጨናነቀው ስለሆነ ደህንነት የሚሰማት ዋናው ምክንያት	1
ከሰአት በኋላ ከትምህርት ቤት ስመለስ ሁለት ሰዎች ከእኔ ጋር መጥፎ ባህሪ ነበራቸው	1
አንዲት ሴት በአውቶቡስ ውስጥ ስትጓዝ ይህን ገጠማት	1
ወንዶች ልጆች አስተያየት እየሰጡ ነበር	1
እዚህ ያሉት አብዛኛዎቹ የኤልጂቢቲ ቡድን ግለሰቦች በሲግናል ላይ ይሰራሉየተቀሩት ደግሞ የዚህ ቡድን አባል መሆናቸውን ለማንም አይናገሩም ወይም እንደ ሴተኛ አዳሪዎች ይሰራሉ ከሜትሮፖሊታን በጣም ዝነኛ የከተማ ዳርቻዎች አንዱ ለብዙ ኤልጂቢቲዎች መኖሪያ ሆኗል ሰዎችበተለይም ታዳጊዎችወንዶች ልጆችበተደጋጋሚ ያስጨንቋቸዋል ሰዎች በዚያ ምልክት ላይ እንደዚህ ያሉ ኤልጂቢቲዎችን በመኪና ፊት ሲጨፍሩ ወይም እንደ ሴተኛ አዳሪዎች ያያሉ ይህ አንድ ወይም ሁለት ጊዜ የተከሰተ ነገር አይደለም ነገር ግን በየቀኑ በዚህ ቡድን ውስጥ ይከሰታል ከተለያዩ የካራቺ ዩኒቨርሲቲዎች የተውጣጡ ተማሪዎች ትንኮሳን ለማስቆም ዘመቻ የጀመሩ ሲሆን በዚህም ምክንያ…	1
ኮሌጁን ለቅቄ ስወጣበአውቶቡስ ውስጥ አንድ ሰው አስተያየት እየሰጠ ን እየነካፎቶ እያነሳ ነበር (አውቶቡስ )	1
በዳዳር ጣቢያ ተነካ እና ትንኮሳ	1
አስተያየት መስጠትበፑንጃቢ ባግ አምፕ ኡታም ናጋር ውስጥ ያለውን አምፕ መጥፎ የፊት መግለጫዎችን መንካት	1
ከሰአት በኋላ ነበር ወደ ቤት ስሄድ በህዝብ ማመላለሻ የተጓዝኩት በአውቶብስ ውስጥ አጠገቤ የቆመው ሰው አስተያየት እየሰጠኝ ነበር	1
አንድ ሰው በሜትሮ ላይ ሲጓዝ ሴት ልጆችን ሞባይል ስልኩን ሲጠቀሙ ፎቶ እያነሳ ነበር	1
በኮሪዶር እየተጓዝኩ ነበርከየትም የመጣ አንድ ሰው ወደ እኔ ቀረበና ጀርባዬን ለረጅም ጊዜ ሲያደንቅ እንደቆየ ነገረኝ	1
አስተያየት መስጠትመጨቃጨቅየፊት መግለጫዎች	1
ከጂምዬ ውጭ ብቻዬን ቆሜ ሾፌሬ እስኪያነሳኝ እየጠበቅኩ ነበር ዘግይቶ ነበር ሹፌሬ እስኪመጣ ድረስ የሚያዩኝ የወንዶች ቡድን ያለማቋረጥ አሳደዱኝ	1
በአንዳንድ ወንዶች ጩኸት እና አስተያየት አግኝቻለሁ	1
ወደ ቤት ስሄድ በጣም ፈርቼ ነበር ሁለት ወንዶች ልጆች አስተያየት ሲሰጡኝ እና ሲያጉረመርሙኝ	1
እኔና ጓደኞቼ ልንጎበኝ ሲሉ እያሾፍን ነበር እያሾፉብን ነበር	1
ይህ ክስተት የተፈፀመው እኩለ ቀን ላይ ነው በሜትሮ መጋቢ አሽከርካሪዎች አስተያየቶች ተላልፈዋል	1
በቀን በሜትሮ ጣቢያው አቅራቢያ አስተያየት መስጠት እና መጎተት	1
ሔዋን እያሾፈችጨዋነት የጎደለው መጋለጥ	1
ከሰአት በኋላ በኦክላ ማንዲ በአንዲት ልጅ ላይ ሳልፍ ምስክሮች ነበሩ	1
በሌሊት አንዳንድ ወንዶች አንዳንድ አስተያየቶችን	1
በነጭ ግልጽ የትምህርት ቤት ሸሚዝ ምክንያት የወንዶች ቡድን ስለ እኛ (እኔ እና ጓደኛዬ) አስተያየት ሰጥተዋል	1
ድመት ጥሪዎችፉጨትበኔታጂ ሱብሃሽ ቦታ ላይ አስተያየት መስጠት	1
ስም ሻንጃና ማኤ ሳም ኮ ጃብ ቲዩሻን ክላስ እኔ ጃቲ ሁ ለቫን ፓር ላድኬ ክዴ ሆካር አስተያየት ካርቴ ሃን	1
በሌሊት ከሴት ጓደኛዬ ጋር ነበርኩ እና አንዳንድ የወንዶች ቡድን አስተያየት መስጠት ጀመሩ	1
ከአያቴ ጋር ነበርንሁለት ሰዎችን አገኘንአስቆሙን እና አያቴ እንዲሰጣቸው እንደሚፈልጉእምቢ አለች እና ይሰድቧት ጀመር	1
አንድ ልጅ ወደ ሜትሮ ጣቢያው እንድጋልብ አቀረበኝ እና ከዚያም ተሳደበኝ	1
በሌሊት አስተያየት መስጠት እና ማጉላት	1
ከሰአት በኋላ ወደ ሜትሮ የእግር ጉዞ በሚቃረብበት መንገድ ላይ ተከስቷል	1
ሁለት ሴት ልጆች በ ወንዶች ልጆች ተጨነቁ (አስተያየት ሰጡ)	1
ከጓደኞቼ ጋር ወደ ኮሌጅ ፌስቲቫል ስሄድ እና ልብስ ለብሼ ሳለሁ አንዳንድ ወንዶች ልጆች በእኔ እና በጓደኞቼ ላይ የተሳሳቱ አስተያየቶችን አስተላልፈዋል	1
አመሻሹ ላይ ገበያ ልወጣ ነበር ከዚያም በመንገድ ዳር የቆሙ አንዳንድ ወንዶች አስተያየት መስጠት ጀመሩ	1
መንገዱን አልፌ ነበርአንድ የብስክሌት አሽከርካሪ ብስክሌቱን ዘገየ እና ጡቴን ነካው ለፖሊስ ቅሬታ አቅርቤ ነበር ነገርግን ከተወሰነ ጊዜ በኋላ ነፃ ወጣ	1
የወንዶች ቡድን ተቀምጠው ያሾፋሉ እና ሴት ልጆችን ይመለከታሉ እንኳን ይደውሉ እና አስተያየት ይስጡ እና ሁሉንም ይንኩ በየቀኑ ከብዙ ልጃገረዶች ጋር ይከሰታል	1
ደካማ የመንገድ መብራትየሰሜን ምስራቅ ዘገባብዙ ትንኮሳዎችን በተደጋጋሚ አጋጥሞታል	1
አንዳንድ ሰዎች በአውቶቡስ ማቆሚያ ላይ አስተያየት እየሰጡ ነበር	1
ከሰአት በኋላ አስተያየቶች (ድመት ጥሪዎች እና ፉጨት) ይደርስብኛል	1
በገበያ ማዕከሉ ውስጥ ስንገዛ አንድ ሰው በእኔ እና በጓደኞቼ ላይ አስተያየት እየሰጠ ነበር እናም ከጓደኛዬ አንዱ በጥፊ መታው እና ከዚያ ሄደ	1
ይህ ክስተት የተከሰተው እኤአ በ በመኪና ወደ ቤት ስመለስ የወንዶች ቡድን ያሳድዱኝ ነበር አስተያየቶችን ያስተላልፉ ነበር ያፏጫሉ እና ጓደኝነትን ይጠይቃሉ ይህ ለ ቀናት ቀጠለ ሁሉንም ነገር ነግሬያለሁ ሁኔታውን ለያዘው ታላቅ ወንድሜ	1
በግቢው ውስጥ የጎዳና ላይ ጨዋታ እያደረግኩ ሳለ የወንዶች ቡድን አስተያየት እየሰጡ እና እያፏጩ ነበር	1
በኔታጂ ሱብሃሽ ቤተ መንግስት የሔዋን ማሾፍ ክስተት	1
በትልቁ የጎዳና ላይ መብራት ዙሪያ ተቀምጠው ሉዶ የሚጫወቱ ወንዶች ወደ ትምህርት ቤት እና ወደ ኋላ ስንሄድ ሁልጊዜ ይረብሹናል ተወዳጅተወዳጅቆንጆ ብለው ይጠሩናል እና ይህ ምቾት አያሳዝነናል	1
አንዲት ልጅ እየተራመደች ነበር እና ሁለት ወንዶች ልጆች በእሷ ላይ አስተያየቶችን አስተላልፈዋል እነዚያን ወንዶች ልጆች በማንገላታት መንገድ ላይ ሄደች	1
በሕዝብ አውቶቡስ ውስጥ ካሉት ሰዎች አንዱ ጊዜ እስከ ሰዓት ሊነካኝ ሞከረ	1
ሁለት ሴት ልጆች እያለፉ ነበር እና በቡድን ውስጥ ያሉ አንዳንድ ወንዶች ስለ ልብሳቸው እና አካላቸው አስተያየት መስጠት ጀመሩ ምሽት ላይ ሆነ	1
ካልካጂ ከሚገኘው የዶክተሮች ክሊኒክ ወርጄ ወደ ቤት መሄድ ጀመርኩ አንድ ረጅምበደንብ የተሰራፍትሃዊ የካሽሚሪ ሰው አንዳንድ ምግብ ቤቶች የት እንዳሉ አውቃለሁ ወይ ብሎ ጠየቀኝ ጭንቅላቴን ጨብጬ አይሆንም አልኩና መራመዴን ቀጠልኩ ከዚያም ከትንፋሹ በታች የሆነ ነገር አጉተመተመ እና አሳዘነኝ ወደ ዶክተሮች ክሊኒክ ለመመለስ ዘወር አልኩ ወደ ኋላ ተከተለኝ እና ከመስታወቱ በር ጀርባ ቆሜ አየኝ እንደገና ተመለሰ እንደ እድል ሆኖ መኪናዬ ሊወስደኝ መጣ እና እሱ ሲፈልገኝ አየን ይህ በ በተጨናነቀ መንገድ ላይ ነበር ሊመርጡኝ የመጡት ጓደኞቼም ይህ ሰው ቃል በቃል እያደነኝ ባለው መንገድ በጣም ደነገጡ ሙሉ እጅጌ ኩርታ ለብሼ ነበር	1
በጣቢያው ዙሪያ ያለው ቦታ እና መድረኩ በወንዶች እና በወንዶች ተሞልቶ ሴቶችን እያዩ አንዳንዶቹም ሴሰኛ አስተያየቶችን አልፈዋል	1
መንካትመጎተትአስተያየት መስጠት	1
እኔና እህቴ መኪናችን እስኪመጣ ድረስ ከገዢዎች ማቆሚያ የገበያ አዳራሽ ፊት ለፊት ቆመን ነበርከዚያ ሁለት ሰዎች መኪና ውስጥ ቀርበው የመኪናቸውን የኋላ በር ከፍተው አብረን እንድንጋልብ ጋበዙን እና አስተያየት መስጠት ጀመርን ከሰአት በኋላ ሰአት አካባቢ	1
ቦሪቫሊ ምስራቃዊ እና ምዕራብ የሚያገናኝ ደህንነቱ ያልተጠበቀ የእግረኛ ድልድይ ከድልድዩ በታች የአደንዛዥ ዕፅ ሱሰኞች መገኘት በድልድዩ ላይ ፀረማህበራዊ ንጥረ ነገሮች መገኘት እንደ ከሰአት በኋላ እና ከምሽቱ ሰአት በኋላ መብራቶች አይሰሩም የተሰበረ የአልኮል ጠርሙሶችሲጋራዎች እና ኮንዶም ተኝተው ማግኘት ይችላሉ በማለዳ አንድ የዕፅ ሱሰኛ እኤአ ሴፕቴምበር ቀን እዚያ ሞቶ ተገኝቷል አይጥ ራሱን ስቶ ሰውነቱን በልቶ ነበር በተጨማሪም ሴቷ አጃቢ ካልነበረች እና ድልድይ ከወጣች ብዙ ወንዶች ትኩር ብለው ይመለከታሉ እና አስተያየቶችን ያስተላልፋሉ	1
ድመት አስተያየት መስጠት እና ፎቶ ማንሳት	1
ከሆስቴሌ ኮሌጅ እየሄድኩ ነበር ሁለት ሰዎች አስተያየት መስጠት የጀመሩበት	1
በአውቶቡስ እየተጓዝኩ ነበር የወንዶች ቡድን ወደ እኔ ቀረበና የግል ክፍሎቼን ለመንካት ሞከሩበዚያው አውቶብስ ውስጥ ለሚጓዙ ሌሎች ሰዎች ያላቸውን ፍላጎት በድንገት ነገረኝ ከዚያም ረዱኝ	1
በመካከለኛ ዕድሜ ላይ ያለ አንድ ሰው በጣም ጸያፍ ቃላትን ነገረኝ	1
መሬት ላይበቆሻሻ መንገድ ተመለከትኩኝ እና እንዲሁም በቆሸሸ መንገድ ተነጋገርኩኝ	1
ትምህርት ቤት እየሄድኩ ነበር አስተያየት የሰጡ የማኔጅመንት ፋኩልቲ ወንዶች ነበሩ	1
የወንዶች ቡድን በእግር ስሄድ ገፋኝ እና የግል ክፍሌን እንኳን ለመንካት ሞከሩ በጣም መጥፎ አስተያየቶችን አስተላልፈዋል	1
በኮሌጃችን ሀይቅ አካባቢ ስንሄድ	1
በሕዝብ መኪና ውስጥ ስጓዝ ብዙ ጊዜ ወንዶችን መጥፎ ቃላትን በመጠቀም ወይም ግንኙነት ለመፍጠር ስሞክር ጥቂት ጾታዊ ትንኮሳ አጋጥሞኛል	1
ተውኔት እያደረግኩ ሳለ የወንዶች ቡድን አስተያየት እየሰጡ ያፏጫሉ (የጎዳና ጨዋታ)	1
በአሾክ ቪሃር ንዑስ ማእከል ተሰጠኝ እዚያም ፋኩልቲው ከእኔ ጋር መጥፎ ባህሪ ነበረው እና በገጸባህሪያቴ ላይ አስተያየት ሰጥቷል ቅሬታ ካቀረብኩ በኋላ ተዛውሬያለሁ	1
ወደ አውቶቡስ ማቆሚያ ስሄድ አንዳንድ ሰዎች ያፏጫሉ እና አስተያየት ይሰጡኝ ጀመር	1
ይህ ክስተት የተከሰተው ምሽት ላይ በአሮጌው ዴሊ ውስጥ በጃማ መስጂድ አቅራቢያ ነው አንዲት ልጅ ከቤተሰቧ ጋር ወጥታለች እና በወንዶች ቡድን ተሳለቀች	1
የማህበረሰቤ ጠባቂ እኔን እና ሌሎች ብዙ ልጃገረዶች አግባብ ባልሆነ መንገድ እያዩዋቸው እና እያዩዋቸው ነው	1
በቦሪቫሊ ጣቢያ ምሽት ላይ ውስጥአንድ መካከለኛ እድሜ ያለው ሰው እኔን እና ጓደኞቼን አሳደደ ያው ሰው ከሰአት በኋላ ሁለት ጊዜ አደረገው	1
ወደ ቤት ስሄድ አንድ ሰው መጥፎ አስተያየቶችን አልፏል	1
አንዳንድ ሰዎች አስተያየት ሲሰጡ እና ፎቶዎቼን በሜትሮ ጣቢያ አቅራቢያ እያነሱ ነው	1
ከሰአት በኋላ በሮሂኒ ሜትሮ ጣቢያ የብልግና አስተያየቶችን ያለፉ አንዳንድ ወንዶች አስተያየት ሲሰጡ አይተዋል	1
በመንገድ ላይ ስሄድ የወንዶች ቡድን እያሾፉእየዘፈኑ እና እያፏጩኝ ነበር	1
ከሰአት በኋላ በ ሜትሮ ጣቢያ ተከሰተወንዶቹ ስለ ሴት ልጅ ተገቢ ያልሆኑ አስተያየቶችን ያስተላልፋሉ	1
ቦታው ለሁሉም የውጭ ሀገር ቱሪስቶች እጅግ በጣም ደህንነቱ ያልተጠበቀ ነው እና ሰዎች ፎቶግራፍ ሲያነሱ ስም ሲጠሩ እና ከእነሱ ጋር ተገቢ ያልሆነ ባህሪ ሲያደርጉ አይቻለሁ	1
ከጓደኛዬ ቦታ እየተመለስኩ ሳለ ሁለት ጎማዬ በአንድ መናፈሻ አካባቢ ተሰበረ በመንገድ ላይ ለ ደቂቃዎች ያህል ለመጠገን እየሞከርኩ ነበር ከዚያም ሁለት ብስክሌቶች ከሩቅ ሲመጡ ሰዎች በአንድ ብስክሌት እና በሌላኛው በአቅራቢያው ቆም ብለው ማፏጨት እና አስተያየት መስጠት ጀመሩ ግን እንደ እድል ሆኖ ችግሩ ተስተካክሏል እና በፍጥነት ስኩቲዬን ገባሁ እና በተቻለ ፍጥነት ወጣሁ	1
ጓደኛዬ ወደ ቤቷ እየሄደች ሳለ አንዳንድ የመንደሩ ሰዎች ሲያዩዋት ነበር መጀመሪያ ላይ በፉጨት ነበር ነገር ግን እነዚያ ጎኖች ከበቧት እና አንዷ እጇን ያዘች እራሷን ነፃ አውጥታ ከቦታው ሸሸች ከገጠር ነዋሪ በመሆኗ በዚህ ክስተት ትፈራለች እና ትፈራለች እና ለፖሊስ ቅሬታ አላቀረበችም	1
ብዙ ወሮበላ እና አደንዛዥ እጽ አዘዋዋሪዎች ሴቶችን እያሳደዱአላፊዎችን እየያዙ እና ፖሊስ ምንም አያደርጉም ለፖሊስመቼም ካነበብክያ መህዲ የሚባል ሰውግንባሩ ላይ ጠባሳ ያለውእና ጓደኞቹ የአደንዛዥ ዕፅ አዘዋዋሪዎች ናቸው	1
እኔና ጓደኛዬ እየተጫወትን ነበር ጠባቂው ስልክ ቁጥሩን የያዘ ቺት ወርውሮ ሸሸ ደጋግሞ ያስጨንቃት ነበር	1
ወደ አንዱ የሳሮጅኒናጋር ሱቅ ሄድኩ ሰውዬው ትኩር ብሎ አየኝ	1
ከሰአት በኋላ በካምላ ገበያ ተከሰተለእኔ በጣም አልተመቸኝም እና በዙሪያዬ ያሉ ሰዎች እሱን ዘንጊዎች ነበሩ	1
በመንገድ ላይ ስሄድ የወንዶች ቡድን አስተያየት ሰጠኝ	1
ይህ ክስተት የተከሰተው በሴፕቴምበር አካባቢ ነው አንድ ሰው እስከ አውቶቡስ ማቆሚያው ድረስ ተከተለኝ ርካሽ ነገሮችን እያጉተመተመ ቀጠለ እና በጣም ፈርቼ ሮጬ ወደ ሜትሮ ጣቢያ መኪና ወሰድኩ	1
በባንድራ ምዕራብ ውስጥ በማጋሪያ መኪና ውስጥ እያለች እያየች ነበር እና በአውቶሞቢል ውስጥ ከሌላ ሰው ጋር መጋፈጥ ነበረባት	1
እነሱ መጥፎ ነገር አይተው አስተያየት ሰጥተዋል ምሽት ላይ ተኛ	1
ጠዋት ላይ ትንኮሳ	1
አንድ ሰው በባቡር ጣቢያው ውስጥ ሊጎትተኝ ሞከረ	1
በባሉዋታር ውስጥ የስጋ መሸጫ ነጋዴዎች (ሰራተኞች) ያፏጫሉ እና በዚያ መንገድ ሲራመዱ የሚያሾፉበት የስጋ ሱቅ አለ በጣም ደህንነት አይሰማንም	1
ጥቂት ወንዶች ጥቂት ልጃገረዶችን ለመንካት ሲሞክሩ እና የተለያዩ ርካሽ አስተያየቶችን ያሳለፉበት በጠዋቱ ሰአታት ነበር	1
መጋቢት ቀን ከምሽቱ ሰአት አካባቢ ሆነ በመኪና ውስጥ ያሉ አንዳንድ ወንዶች እኔን እና ጓደኛዬን እያሳደዱኝ መኪናቸውን ከመኪናዬ ፊት ለፊት አስቁመው በፖሊስ እርዳታ ከዚያ ብናመልጥም አስተያየት መስጠት ጀመሩ	1
በግል አውቶቡስ ውስጥ ያሉ አንዳንድ ወንዶች ስለሌሎች ልጃገረዶች አስተያየት ይሰጣሉ	1
ወደ ቤቴ እየሄደ ሳለ ይህ አዛውንት መኪናውን የሚነዳው ከጎኔ ቆሞ እያየኝ መኪናው ውስጥ እንድገባ ጠየቀኝ	1
እኔና እህቴ በመንገዱ ላይ እያለፍን ሳለ አንዳንድ ወንዶች ልጆች እያፏጩእያዩ እና አለባበሴን እና የተራመድኩበትን መንገድ አስተያየት እየሰጡ ነበር	1
ያ ሰው በሴቶች ወንበር ላይ ተቀምጦ ወንበር እንዲሰጠው ጠየቅኩት መጥፎ ባህሪ ማድረግ ጀመረ	1
ተጎጂውን ተከትለው የወንዶች ቡድንም ጨዋነት የጎደለው የፊት ገጽታ ያደረጉ እና ጸያፍ አስተያየቶችን አስተላልፈዋል	1
ይህ አካባቢ በምሽት በጣም ደህንነቱ ያልተጠበቀ ነው	1
በራክሻም ኒላያም አቅራቢያ በምሽት ስለ አንዲት ሴት አስተያየት ሲሰጡ ከነበሩት ሰዎች መካከል ጥቂቶቹ ተገኝተዋል	1
ልጅቷ በአኑሻክቲ ናጋር የማህበረሰብ ማእከል አቅራቢያ ስታልፍ የወንዶች ቡድን አስተያየቶችን እያስተላለፈ ነበር	1
ከቀኑ ዓም ጀምሮ ይህ ጎዳና ሰክረውም ሆነ ከፍ ባሉ የሪክሾ ሹፌሮች የተሞላ ሲሆን በመንገድ ላይ በቡድን ተሰባስበው አስተያየት በሚሰጡ የአካባቢው ነዋሪዎች በሌሊት በዚህ መንገድ መሄድ በጣም ደህንነቱ ያልተጠበቀ ነው	1
ከኮሌጅ ሲመለሱ በሞተር ሳይክል የተሳፈሩ የወንዶች ቡድን ተሳለቁብኝ	1
ሁል ጊዜ በግል ክፍሎች ላይ ማየት	1
አንድ ቀን በሻህዶራ ድንበር ላይ አንድ ወንድ ልጅ በብስክሌቱ ልጃገረዶችን ሲያሾፍ ዋዝ አደረገ	1
አንድ ሰው እያየኝ ነበር እና አስተያየቶችን እየሰጠኝ ነበር	1
ከሰዓት በኋላ አስተያየት መስጠት እና ጥሪዎች	1
አንዳንድ ወንዶች ስለ ልጃገረዶቹ አስተያየት እየሰጡ ያፏጩ ነበር	1
በጎዳና ላይ ስሄድ ብዙ ወንዶች ስለ እኔ አስተያየት ይሰጣሉ	1
በየቀኑ ማለት ይቻላል ይከሰታል	1
በአንድ ወቅት በቾውፓቲ ነበርንጥቂት የማይታወቁ ወንዶች ልጆች መጥተው ማውራት እና አስተያየት መስጠት ጀመሩ	1
በመንግስት ትምህርት ቤት ልጃገረዶች ላይ አስተያየት ሲሰጡ እና ለማጥቃት የሚሞክሩ ወንዶች	1
በበዓል ሰሞን ከጓደኞቼ ቡድን ጋር ነበርኩ የምሽት ሰአት ነበር በሰከሩ ሰዎች አልፈናል እና እስከዚህ ድረስ ጥሩ ነበር በኋላ ከወንድ ጓደኛዬ አንዱ በተመሳሳይ መንገድ መመለስ ነበረበት ሲመለስ በእነዚያ ሰካራሞች ተደበደበ	1
ቦታው በጎኖች የተከበበ እና ለጉዞ በጣም ደህንነቱ ያልተጠበቀ ቦታ ነው	1
በቡና ስብሰባ ላይ እያለን በሌላኛው ጠረጴዛ ላይ ያሉ ሰዎች አስተያየት እየሰጡ ነበር ትኩረትን መሰብሰብ አስቸጋሪ አድርጎታል እና ያለማቋረጥ እያዩ ነበር	1
ከኮሌጁ ውጭ የቆሙ የወንዶች ቡድን አስተያየት ሲሰጡን እና ድመት እየደወሉ ነበር	1
አንድ ወንድ ጓዳውን ከፍቶ የግል ክፍሎቹን የሴቶች ቡድን ለማሳየት ሞከረ	1
በአሁኑ ጊዜ በሁሉም ቦታ ነው እና በእያንዳንዱ ጊዜ ይከሰታልበሴክተር በሁሉም ቦታ ይከሰታል	1
በእረፍት ጊዜ ማንዳዚን ለመግዛት ወደ ሾፕ እየሄድኩ ነበር፣ከዚያ ሰካራም ሰው ጋር ተገናኘሁ ሄዬ ቤቢ ይሉኝ ጀመር በጣም ጥሩ ጫጩቶች አሉኝበምትኩ የሄድኩት አዛውንት ስለነበር ምላሽ ሰጠሁ	1
አንዳንድ ወንዶች ተንጠልጥለው ያለማቋረጥ አስተያየቶችን የሚያስተላልፉ እና በሴቶች ላይ የሚርመሰመሱ አሉ	1
[truncated: 15,201 more rows]
