# Supplementary material for: An Amharic sexually explicit content detection model using fine-tuned bidirectional encoder representation from transformers and explainable artificial intelligence
Source: PeerJ journal article supplement (doi:10.7717/peerj-cs.3529), 2026-01-30
Supplement: Normal_comments.xlsx [file Normal_comments.xlsx]

## Sheet: Sheet1
comments	label
አስቀድሜ ጥያቄዬ በጨዋነት በውስጥ መስመር እንዲደርስዎ አድርጌ ፍትህን ለማገዝ ብሞክር እርስዎ የመፅሀፍ ቅዱሱ የዳዊት ኦሮዮንን መንገድ በመምረጥዎ በይፋ ለመፃፍ ተገድጃለሁ አሁንም መረጃው እንዴት እሱ ጋር ደረሰ የሚለውን ውትወታ ትተው በማንኛውም መንገድ ቀጥተኛ ምላሽ ይስጡኝ ከመስከረም ወዲያ አሁን ያለሁ መንግስት ህጋዊ የስራ ዘመኑ ስለሚያበቃ የባለአደራ መንግስት እንዲቋቋም ሆኖም አሁን ያለው የአብይ መንግስት አስፈፃሚ አካል የመንግስትን የእለ ተእለት ተግባራትን እየከወነ ምርጫ እስኪደረግ ለ አመት እ	0
እነዚህን ወሳኝ ጉዳዮችን የሚያስፈፅም አካል እንዲቋቋምና ክትትል እንዲደረግ በመግለጫው ጠይቀዋል	0
የአማራ ህዝብ በአእምሮ ክንፉ ያልበረረበት ጥበብና ፍልስፍና ያልከፈተው የእውቀት ጎዳና አይኑ ያላየው ጆሮው ያልሰማው ልቡ ያላሰበው እውቀትና ብልሀት የለም	0
ከአማራ ህዝብ የሀገሪቱ ዘርፈ ብዙ እውቀት መንጭቶ የሞላበትከሙላቱም በመልክ በመልኩ ሲቀዳበት የኖረ ከኢትዮጵያ አልፎ ለአለም ሲታደል የኖረውና የሚኖረው እውቀት የተገኘበት ታላቅ ነገድ ነው	0
በአማራ ህዝብ ግን ደም የገበረባትአጥንት የከሰከሰባት ሰንደቅአላማ ናትና በሀዘኑበደስታውበአደባባይና በሰልፍ በክብር ያውለበልባታልይፎክርባታልያዜምባታል	0
የኢትዮጵያ ብሄራዊ ቡድን በመቀሌ እስታዲየም ሲጫወት የገቡት ደጋፊዎች በፍሬ የሚቆጠሩ ናቸው ሊያውም ይዘውት የገቡት የትህነግን የደደቢት አርማ ይዘው እንደሆነ የቅርብ ጊዜ ትውስታ ነው	0
ዛሬም የአርሰናሉን ፔፔን የቶተንሀሙን ሰርጅ አውሪር ይዞ የገባው ኮትዲሾዋር ብሄራዊ ቡድን በአማራ ወጣቶች አስደማሚ ድጋፍ ዋልያዎቹ አሸንፈው ወጥተዋል	0
ሀገራዊ ወግ ያለው ለሁሉ የሆነ አስገድዶ ሳይሆን በፍቅርና በልዩ ሰዋዊ አቀራረብ የሚቀርብ ትልቅ ሲሆን በፍቅር ስለፍቅር ከሁሉ የተዋለደ የወለደ የአለማቀፋዊነት ውሀ ልክ ያለው ወዘተ ህዝብ ነው	0
አንድ ጥያቄ አለኝ ወገኖቸ ዋልያወቹ ባህርዳር እስታዲዬም ሲጫውቱ ሁሌም የሚያሸንፉት በላይ ዘለቀን ነው አፄ ቴዎድሮ	0
የጎንደር ስልጣኔ የቅማንት ነውየዛውጌ ስርወ መንግስት የአገው የፊደል የብራና የዜማ የግእዝ የእመን ፅሁፍ የውቅር አብያተ ክርስትያን የክርስትና እና እስልምና እምነት የመጀመሪያ የተቀበሉ ትግራይ ነው	0
ታዴ ትክክል ነክ የዛሬው ጫወታ አአ ቢሆን ጉድ ነበር ማንም አይታገሳቸውም ነበር እንደዛ ለዱላ ሲጋበዙ በገዛ አገራችን የትኛውንም ወጣት ለፀብ ይጋብዙ ነበር የባህርዳር ህዝብ ግን ትእግስቱን ሳላደንቅ አላልፍም ብሄራዊ ቡድናችንንም እንደዛው ውጤቱን በጋራ ነው ያመጣችሁት እናመሰግናችኀለን ክብር ይገባችኋል	0
እኔ ምንም አልልህም ቃላት ያጥረኛል እጅህ ይለምልም	0
እግዚአብሄር ይስጥህቅቤ አጠጣኸኝአንተም ጠቢቡ አማራ ያፈራህ የጥበብ ሰው ነህበርታ	0
እድሜ ከጤና ማስተዋል ጨምሮ ያኑርክ ወንድማች	0
እኔ የአቢሲኒያ ምድሪ ሀበሻ መሰረት አድርጌ እውነተኛ ታሪክ ፅፌአለሁ	0
ግዜር ይስጥልን ታዴ እድሜና ጤና ይስጥህ	0
ዋው ምን አለ አምላኬ እንዚህን የሰፈር አክስቲቨት ነን ጦማሪ ነን የሚሉት ዘረኞች ፈጣሪ ምን አለ ካንተ እሩብ እውቀት ቢሰጣቸው	0
ፈጣሪ አለ ለአማራ ህዝብ ሲሰደድ በአገሩ ለ የጥቁር ፋሽስቶች አንገትን አይደፋም ፈሪያ ፈጣሪ የሆነ ህዝብ ከአማራ ቤት ታገኛለህ በክርስትና እምነት ስትሄድ ለአገሩ የማፀልይ ኩሩ ህዝብ በስልምናም ስትሄድ ጨዋ ሀይማኖት ተባቂ ነዉ ሰዉ አክባሪ እስላሙ አማራዉ ለአፍሪካ ፊደል ያላት ብቸኛዋ አገር ኢትዮጲያ	0
በድንጋይ ፈልፍሎ ቤተክርስቲያን የአነፀ ጥበብ ህዝብ ነዉ በዮዲት ጉዲት ቤተክርስቲያን ዉድመት የተረፈ መንዝ በድንጋይ የተፈለፈ በቤተክርስቲያን እንጠጦ ማሪያም በመሬት ዉስጥ መንገድ ያለዉ እንጠጦ ማሪያም ገዳም ይህንን የፈለፈሉ መንገድ መሬት ለመሬት የሚያስኬድ የፈለፈሉ ታራካዊና ጠቢባዊ የአማራ	0
ውነት ለመናገር አስመስክራቹሀል ብዬ ማለት እችላለሁ	0
የአማራ ምድር ሀሌም የተባረከ እና የተቀደሰ ነወ	0
የዛሬዉ ጨዋታ ባዳር ባይሆን ብዙ ችግር ይፈጠር ነበርአማራ ታጋሸ ህዝብ ነው	0
ዛሬ በጣም ደስ ብሎኛል ከሚገባው በላይ እምየ ኢትዮጲያ ዙሮ መግቢያየ ያምላክ ፀጋ ኮርቸባችሀለሁ ደሜ ናችሁ	0
ቃላትን ስትሰካካቸው እየተወሰውስኩ ነው ማነበው	0
በአማራ ምድር ኢትዮጲያ አትሸነፍም	0
እኔ ኮ የፊደል አቀማመጥህ ይገርመኛልእንኳንም አማራዬ ነህ	0
እፁብ ድቅ ማለትጅ አተን መግለጥ በቃል ከባድነው በርታልን	0
አንዳንድ ፈሪሀ እር ለማያቁ ድንክየወች ሊያጥላሉ ይችላሉ ትክክል ነው አንደበት ያለው ይገንዘበው ወንድሜ	0
ሁሌ ስታስቡ ትግራዋይ በውስጣቿለ ውድድሩ ከትግራዋይነው	0
መቸ ለአማራ ባለውለታችን እንደማለት ዙሪያውን ጥላታችን ተባልን ይገርማል	0
ትንሽ ትቆይና ሰውን የሰራነው እኛ ነን ትላለህ	0
አማራ ፍቅር እኮነን ስለሆንኩ አይደለም እውነትም ፍቅር ነን	0
እውነተኛ ትክክለኛ ነገርን ተናገርክ ደስስስስስስ ይላል ብሄራዊ ቡዲናችን ሁልጊዜ ባህርዳር ቢጫውት አይሸነፍም	0
እኔ አማራ አደለሁም ግን እውነት ለማውራት እንደ አማራ ታጋሽ ህዝብ የለም	0
የሚገርም አገላለፅ እግዚአብሄር ይስጥልን ወንድማችን	0
ታታሪው አማራው ሳይሆን ኢትዮጵያዊው ጋዘጠኛ ታደለ ጥበቡ እናመሰግናለን በርታ	0
አዎ አማራ ለኢትዮጵያ ያስፈልጋታል ኢትዮጵያ ያለ አማራ ባዶ ናት ለዚህ ነው አማራ ኢትዮጵያ የሚል አንተ ፀሀፊው እውነትዮ አማራ	0
ወንድማችን እዉቀትን ከትግስት ጋር እድሜን ከጤና ጋር ይስጥህ	0
ታሪክ የምታውቁ ሰወች ታሪካችን ለማስተዋወቅ እንዳትሰለቹ በበኩሌ አመሰግናለሁ	0
እውነቱን ገልፀሀዋን ቀጥልበት እንወድሀለን ዋላያወቹን ያበርታልን	0
ታዳ ባድራውን አርማውን ለምን ያዘው	0
ነገ ደግሞ ከሰማይ መስቀል ወርደ ብላችሁ	0
ችግሩ እኮ እዚህ ላይ ነዉ ኢትዮጰያዊነት በአማራ ህዝብ ልብ ዉስጥ ብቻ ነዉ ያለዉ ለማለት ስሌላዉ ህዝብስ በጥቅለላ ለመፈረጅ ወጣ ብለህ ብቶመለከት መልካም ነዉየባህር ዳር ህዝብ ግን እንደሁሌዉም ምንም የማይወጣለት ድንቅ ህዝብ ነዉ	0
እሳት ነበልባል የሆንሽ ልጅ	0
ሲጀመር በአሉ አግባብ ነው ዎይባሀላችን ሀይማኖታችንስ ይፈቅዷል ዎይ ትላንት የፍቅረኛሞች ቀንን ስንቃዎም ነበር ከባሀል አንፃር እናት ካመት እስካመት ቀኗ ቢከበርላትም አይበዛባትም ግን ይሄ በኛ በራሳችን ቀን አቆጣጠር ነው ምናከብረው ዎይስ ነጮች ባመጡት ይሆን	0
በጣም የሚገርም ነው¡	0
የእናቶችን ቀን በማስመልከት ስለናቴ የፃፍኩትን ታናሽ ወንድሜ ለአባቴ ያሳየዋል	0
የአባቶች ቀን ደግሞ የፊታችን ሰኔ ይከበራል ስለው ቀጠለና በል የልጆች ቀን ሲደርስ አሳውቀኝ ሲለኝ ሳቅ አመለጠኝ	0
አባቴ ቄስ ጥበቡ ካህን ጠባቂ መምህር በእግዚአብሄር ፊት የሚቆም የእግዚአብሄር አገልጋይ የህዝብ መሪ አስተማሪ ኖላዊ መንፈሳዊ አባትም ነው	0
ዘመንህ ይባረክ የአባትህ ፀሎት ይጠብቅህ‼መሰረተ ፅኑ ከሆነ አሀዱ ብለዉ ከሚያመሰግኑ ሀበነ ብለዉ ስጋዉን ከሚፈትቱ የተገኘህ በመሆንህ እጅግ ደስ ይበልህ‼ለእኛም ፀሎታቸው ይድረሰን‼አንተም እንደ አባትህ በማስተዋል እንድትጓዝ እግዚአብሄር ይርዳህ‼ሀይለ እግዚአብሄር አይለይህ‼ሰዉን በስሙ ሳይሆን በአካል የምትረዳ ያድርግህ	0
ሰዉ ሲያምንህ የምትታመን ሰዉ የዉስጡን ሲነግርህ የምታደምጥ ሁን‼‼‼ምክሬ ነዉ‼ነቢዩ ኤርምያስ እንዲህ ይላል ሴዴቅያስን እና መሰሎችን እኔ የምነግርህን የእግዚአብሄር ቃል እባክህ ስማ በህይወት እንድትኖር ይለዉ ነበረ	0
እናት ማለት የልብ ትርታ ውስጥ እንደሚፈልቅ የደም ዥረት ናትየእናት ፍቅር በዘመን የማይጠወልግበጊዜ የማያረጅበወራት የማይደበዝዝዘላለም አብሮ የሚኖር የሰውነት ምሳሌ ነው	0
እናትነትን ለመግለፅ ቅኔ ቢደረድሩ ቋንቋ ላይ ቢራቀቁ ዜማ ላይ ቢፈላሰፉ ተገልፃ አታልቅም እናትነት ጥልቅ ነው ውስብስብ ነው ምስጢር ነው	0
ዛሬም በድሬዳዋ ዩኒቨርስቲ የኛ አመት	0
በራእይ ዮሀንስ የተፃፈው አደጋኛ አውሬ በዚህ የሚቆም አይመስልምየመጨረሻው ዘመን ላይ ደርሰናል	0
አሁንም መማሪያ የላችሁምና በሚያዋጉን ጉዳዮች እንጂ በሚያስማሙን ጉዳዮች ላይ ለመፃፍ ፍላጎቱ የላችሁም	0
ነብሳቸውን በአፀደ ገነት ያኑርልን ለቤተሰቦቻቸው መፅናናትን ያድልልን ከእንደዚህ አይነቶች ክፉና አረመኔዎች ትውልዱን በቸርነቱ ይታደገን አቤቱ ኢየሱስ ክርስቶስ ሆይ የፍቅር አይኖችህን ወደ እኛ መልስልን	0
ነፍሳቸውን በአፀደ ገነት ያኑረው በጣም ያሳዝናል	0
የግፍ ፅዋቸው አስኪሞላ ነው ትእግስቱ ዋጋ ይከፍሉበታል ይዘገይ ይሆናል እንጂ የንፁሀን ደም እና የአባቶች እንባ በከንቱ ፈሶ አይቀርም እግዚአብሄር ትእግስቱን ይስጠን ለመንግስት ባለስልጣናትም የህሊና ፍርድ ይፈርዱ ዘንድ አስተዋይ ልቦና ይስጣቸው	0
ወዲና ወዲያ ሆናቹህ የእውሸት ትርክት እየፃፋቹ ኑፁኀን ወገኖቻችንን ምንም በማያቁት ምክንያት ቆም ብሎ ማሰብ በተሳነው በሱስ እና በማይጨበጥ የተስፋ አለም ውስጥ በተዘፈቁ ቅዠታሞች ተጠቅማቹህ የምታስጨርሱት	0
አሁንስ ምንድን ነው ወሬህ ኧረ በቃን ስንቅ አሊያ እውቀት አይደል እያቃበልከን የለኸው በንፁ	0
ፍሳችሁን በቅዱሳን እቅፍ ያኑርልን የምር የአማራ ክልል ህዝብ እግዚአብሄር ይጠብቃችሁ መከራው በዛባችው ለምንስ እንደ ጦስ ዶሮ ተቆጠራችሁ አረ አቤቱ ድረስልን	0
ነፍስ ይማር በሀላ ግን በመታወቃቸው ነው እማፍሩት መቸም እማያልፍ ቀን የለም	0
ሞት ያለ ቢሆንም አማሟታቸው እጅግ ያማል ግን ለሁሉ ቀን አለው	0
እደመሸ አይቀርም ሁሉ በጁ ነውና እግዚአብሄር አምላክ ነብሳቸውን ባፀደ ገነት ያኑርልን	0
ምድራዊ መንግስት የለንምናበበዛው ጥበብህ በማይሳነው ሀይልህ ከሰውአውሬወች ጠብቀን	0
ወይኒ ወንድሞቸ ነብስችሁን ይማረዉ ያስዝናል	0
ትክክል ይህ የነሱ የዘመናት የማይቀየር ባህሪ ነው	0
ደለ ጥንቡ እየዘራህ ያለውን አንተው ብታጭደው ጥሩ ነበር ግና ምን ያደርጋል ዳፋው ከክልሉ ውጭ ላለው ማህበረሰብ ነው እሚደርስ	0
እኛ የሚያጣላን እና የሚያለያየን ሳይሆን አንድ የሚያደርገን እና የሚያቀራርበንን ነው የምንፈልገውአጥፊዎችና ወንጀለኞች ለፍርድ እንድቀርቡ የሁላችንም ጥያቄ ነው	0
ቆይ የሁላችንም ተረጋጉ ክፉዉን ከደጉ ለዩ ሁሉም ደግ ቢሆን ፍርድቤት ባልነበረ እንዲሁም ሁሉም ክፋ በነበረ አሁንም ፍርድቤት ባልነበረ ግን አሁንም እድል አለ ይቅር መባባል መመካከር መማማር መተሳሰብ አንድ መሆን ክፉዉን ጊዜ ያርቅልናል	0
ኡፍፍፍፍ መከራችን በዛ ነፍሳችሁን በአፀደ ገነት ያኑረው	0
ውይ ወገኖቼ እግዚአብሄር አምላክ ነፍሳችሁን በአፀደ ገነት ያኑርልን እህህህህ	0
ለሚሞት ሰው ሞት ይገባዋል ይላል ቅዱስ ቃሉ ነገር ግን ለገዳይ ይብላኝለት ሴፍ የመዘዘ ሴፍ ይመዘዝበታል ለሟች ነፍስ ይማርልን መግስተ ሰማያት ያኑርልን	0
ነፍስ ይማርህሌና ለሌላቸው ህሌና ይስጣቸውሰው አፈር መሆኑን እረሳ ነገም የእሱ እጣ ፈታ የባሰ ነውሰው በሰፈረው ቁና ይሰፈራልናአማራ እስከ መቸ ነው ዝም የሚለው ልጅህ እየታረደ አተ የሰላም እቅልፍ የምተኛው ለይበርሰቲ ተማሪዎች መፍትሄ ፈልጉላቸው እናት ገመድ ታጥቃ ያሳደገችውን ልጅ ስታጣ እዴት የከፍ ሀዘን ነው	0
በወልዲያ ዩኒቨርሲቲ የተገደሉት ልጆችን ጉዳይ መንግስት ያወግዛል	0
ትክክለኛ ሰው ከሆንክ ሁሉም ቦታ የተፈፀመው ወንጀል ወንጀል ነው የሌላው አረመኔ አደረገ የራስን ኮካ እየጋበዝክ የሞቴ እንዳይመሰልህ ጥላቻ ጥላቻን ይወልዳል እንጅ ማንም እየጠላው ውደደኝ የሚል ሰው የለም የወልዲያንም አሟሟታቸው ፃፍ ሰው ከሆንክ አለበዚያ ደነዝ ሰው ነህ	0
በወረራ እንደመጡ እንካን የተሳሳተ ታሪክ ነዉ ለማለት ይዳዳቸዋል የዱሮ ሰዉ ሀቀኛ ነዉ ዉሸት አያቅም	0
ውድ የኦሮሞ ህዝብ ሆይ ስው የለም ወይ በሀገሩ አንድ አካል አንድ አምስል ሁነን ተፍቅራን የኖርንበትን ኢትዮጵያን አሻበሪው በስመ ኦሮሞ ነኝ ባዩ የኦሮሞ ህዝብ ወደ እስልምናሀይማኖት እየቀያራ መሆኑንና አማራ ህዝብ ላይም ግፍ በማድረስ ላይ ይገኛል	0
አቤቱ ጌታየ ሆይ እስከ መቸ ነው ዝም ብለህ የምታየነን አረ አሁንስ አምላኬ ዝምታህ አስፈራአረ ይሀ ሁሉ ዝምታህ ለመቸ ይሁን አረ ስው ለራሱ አደለ ሰይጣን የሆነው አቤቱ በምህረትህ አስበን ይቅርም በለን ወንድሞቼ ነብሳችሁ በገነት ያንረው	0
ሁሉንም ከማያዳላው ቀለም ከማይለየው ዘር ከማይለየው ደሀ ሀብታም ከማይለው ፈጣሪ ሁሉም የእጁን ያገኛል	0
ግን ታደለለ ፁሁፍክን ስትፅፍ አማራ ኦሮሞ ትግሬ ሱማሌ ሀረሬ ወዘተ እያክ ባትጠራ ጥሩ ነው የአማራ ጥቂት ቡድን ለፈፀመው ጥፋት ሁሉም አማራ መወቀ የለበትም	0
ጥቂት የኦሮሞ ቡድን ለፈፀመው ጥፋት ሁሉም ኦሮሞ መወቀስ የለበትም ሁሉንም ከምትፈርጅ የጥፋት ሀይሎች ብትል አሪፍ ይመስለኛል	0
የሰው ልጅ መሞት የለበትም ግን ወልድያ ዩኒቨርሲቲ የሞቱት የኦሮሞ ልጆቹ ሳይሰመሰህ የነዚህ ብቻ ተሰማህ	0
ነፍስ ይማር ግን ሁሉም ኦሮሞ አይደለም እንድህ የሚደረገው ትንሹች ጠባብ ናቸው	0
ለነሱ ፍርዱን ለሟቾቹ እህት ወንድሞቻችን ነፍስ ይማር	0
ዘርእየጠራንከምንወቃቀስሁሉምየጌታፍጥረቶችናቸውአሁንበቃንእንፀልይ	0
ነብሳቹሁን እንደ ቸርነቱ ይማረው ወገኖቼ	0
ነፍሳቸዉን ይማረዉ	0
ነብሳቸውን ይማረው	0
ነብሳቸውን በአፀደ ገነት ያኑርልን	0
ነብሳቺሁን ባአፀደ ገነት ያኑራት	0
ነፍሳቸውን በአፀደ ገነትይቀመጥላቸው	0
ነፊስ ይማሪ ይዝገይል እንጅ እግዝአብሄሪ ይፈሪደል ሴይፊ ይምያነሱ በሴይፊ ይጣፈሉ	0
በእውነት በጣም ያማል ፍጣሪ ነፍሳችሁን ባፅደ ገነት ያኑርው	0
የኔ ወዲምም እዛው ይማራል ይምየ እኔ ምን ላርግህ አላህ ይከተልህ ክፉህን ለኔ ወዲሜ	0
የአላህ እር ጉዲ ነው ነፍሳችሁን ፍጣሪ ይማርላችሁ	0
ወገኖቻችን ነብሳችሁን ባፀደ ገነት ያኑር ወይኔ ጭካኔ ያሳዝናል	0
ጃዋር መሀመድ በአግባቡ ሳይሰለጥን የቴኳንዶ ዩኒፎርም ወይንም ደቦክ ለብሶ ጥቁር መቀነት መጠምጥሙን ሳይ ከመጠምጠም መማር ይቅደም የሚባለውን ምሳሌያዊ አነጋገር አስታውሶኛል	0
ቴኳንዶ ከሙያዊ ብቃትና ቴክኒክ በተጨማሪ ትሁትና የታነፀ ባህርይ ሀቀኝነት የማይበገር ፅኑ መንፈስ እራስን መቆጣጠር ነው	0
ጓደኞቼም ከዚህ የራቁና መፅሀፍ አንባቢዎች ናቸውወጣቱ ቢራ ከመጠጣትሰከሮ ከመደባደብቁማር ከመጫወትሲጋራ ከማጨስጫት ከመቃም ወጥተው ወደ ትክክለኛው ተክለቁመና መፅሀፍ ማንበብስፖርት መስራትና እንደ ሀይማኖቱ ፀሎት ማድረግንን ሊለማመድ ይገባል	0
ይባርክህ የተጫማው ጫማ በራሱ የቴኳንዶ መስሪያ አይደለም ለማንኛውም ለወጣቱ የመከርኽው ምክር ብርቱና ጠቃሚ ነው	0
የተጫማው ጫማ በራሱ የቴኳንዶ መስሪያ አይደለም ለማንኛውም ለወጣቱ የመከርኽው ምክር ብርቱና ጠቃሚ ነው	0
ይታደሉታል እንጂ አይተገሉትምና እግዚአብሄር ከዚህ በላይ ጥበቡን ያብዛልህ ወንድሜ	0
እውነት በእውነተኞች አደበት እጅግ ውብ ናት	0
በእውነት የምትደነቅ ልጂ ለሁሉም ትምህርት ስጥ	0
ታዴ ብዙ ጊዜ እከታተልሀለሁ በመሆኑም አደንቅሀለሁ ቃላት እያጠረኝ አስተያየት ሰጥቸህ ባላውቅም ዛሬ ግን እራስክን የምትጠብቅ እና ፈሪሀ እግዚአብሄር እንዳለህ ሳውቅ በእጅጉ ወደድኩህ አየህ እራስክን ስትጠብቅ አንፀባራቂ ትሆንና ሰው ሁሉ ሊያደንቅህ ይገደዳል አይዞህ በርታ ወንድሜ	0
ገላጭ የተግባር ሰው እንዲህ ነው	0
እግዚአብሄር ይጠብቅህ የልብ አድርስ የሆንክ ልጅ	0
እንቁ ነገር ነህ ፈጣሪ ከሁሉም ነገር ይጠብቅህ	0
ኦዎ ታይኳንዶ ፅናትን ትህትናን ጥሩ ስነምግባር እንዲኖርህ አርቆ የሚማሩት እስፖርት ነው የወርልድ ቴኳንዶም ሆነ ኢንተርናሽናል ቴኳንዶ የመጀመሪያ መርሆቻቸው ታዛዥነት አክባሪነት ተቀዳሚ ነው ለማስተሩ የማይታዘዝ ተማሪ ከስልጠና ይታገዳል ጃዊሳው እንኳን ላሰልጣኝ ለመሪዎቹ የማይታዘዝ አጉራ ዘለል ከበብሽ ነገር ነው	0
የታቀፈው ቦርጭ ጫማዉን እንኳ ከመሰር የከለከለዉና ሚስቱን ማድረግ የሆነበት ቀፈታም ሆድ ተኮር መስሎ መታየት የለመደበት ስብእናዉ ገና ያገር ወጥ ያስረግጠዋል ታዴ	0
ተባረክ ወንድሜ እኔማ ከልጂነትህ ጄምሮ በ አስተዳደግህም በ ባህሪህም ስለማውቅህ ለቀባሪ ማርዳት ነው የሚሆንብኝ	0
ወንድሜ የልጂ አዋቂ ነህ እር እድሜና ጤና ይስጥህ በጣም አከብርሀለሁ	0
ለሁሉ ምሳሌ ነህ እግዚያብሄር ይባርክህ	0
ዋው ምርጥ ልጅ ታደለ ጥበቡ ፈጣሪ ይጠብቅህ	0
ጫታሙ ቀፈታሙ አጋሰሱ ስው በላው ጨካኙ ጃዋር ሰምታሀል	0
ታደለ ጥበቡን ያለማድነቅ እንዴት አይቻልም	0
ዋው ታዴ ሁለገብ እና ልዩ ሰው እንዴት ሆነ ብየ እያሰብኩ ነበር ይህችን ስፖርትጥበብ በፍቅር ነው የምወዳት	0
ታዴ ለካ በብዙ እውቀትክህሎት እና ብቃት የታጨቅ ነህፈጣሬ ጤና ይስጥህ	0
መሆን ያለበትና ትክክለኛው ይህ ብቻ ነው	0
የቴኳንዶ ፍልስፍናና አስተምህሮም	0
ታዴ መልካሙ ሁሉ ላንተ ይሁን ግሩም አገላለፅ እሚገባው ካለ	0
ከመጠምጠም መማር ይቅደም ታሪክ ሳያውቁ ነው ዛሬ እደዚህ ለሀገር ጠላት የሆኑት ያምራል ታዴ	0
ቴካዶ ማለት በመጀመርያ እራስን አሳልፎ መስጠት ለሌሎቺ መናር ማለት ነው	0
በአለማቺን ላይ አራት የቴካዶን ጥበብ ተፅኖፈጣሪወቺ እደሚሉት	0
ምንጊዜም የምትሰጣቸው አስተያየቶች በውቀት ላይ የተመሰረቱ ናቸውና በጣም አደንቅሀለው	0
መሆን እና ማስመሰል ይለያያሉ	0
አንተ ሆነህ ነው ያሳየኸን ታዴይሄ ጥበብ በምኞት ብቻ አይገኝምድካምን ጥንካሬን ብስለትን ትእግስትን ገንዘብንጊዜን ይጠይቃል	0
ብላክ ቤልት ለመድረስ ረጅም አመታትንም ይወስዳልፈተና አለው የብቃትየክህሎት የጥንካሬ እና የቴክኒክ ፈተናእኔም በዚህ አልፊያለሁ ብላክ ቤልት ለማግኝት አምስት አመታትን ወስዶብኛል	0
የዘረዘርኳቸው አንተም ሆነህ የተገኘኸውም ጥሩ መገለጫዎች ሲሆኑ ከጁሀር አንፃር የሰነዘርከው ግን ጥዩቅ አይደለችም	0
ግን ያሚገርመኝ ይህ ሰውዬ የሆና ነገር ይዞ ሰመጣ ሰው ከጉራንጉር ብቅ ይለል ሌለ ጊዜ ብታሰታምር ምን አለበት	0
በጁሀር ጉዳይ እኔም የተሰማኝን ብያለሁ ምክንያቱም ሙያው ውስጥ አለሁ ቴኮንዶ አስተዋይ እሩሩ ነው እንደማውቀው ወንድሜ	0
ፖለቲካ ሳይገባው ፖለቲከኛ ሆነ አሁን ደግሞ ከጫት ወደ ቴኳንዶ ለዛውም ጥቁር ቀበቶ ምክንያቱም ኬኛ ነዋ ጉዳዩ አሁን ችግር የሆነው ከኢንፎርማል መሪነቱ በአቋራጭ መሪዉን ልቆጣጠር ማለቱ ላይ ነው	0
የእኔ ጀግና በርታልኝ ኢትዮፅያችን አሁን የምትታመሰው እንዳንት አይነቶች ማነሳቸው ነው	0
እደግ ወንድሜ ወጣቶቻችን ተምሳሌት ይፈልጋሉ	0
ምን አልባት የጃዋር ፀባይም በስፖርት ሊቀየር ይችላል	0
ክበርልን ወንድም እኛም የምናውቀው በባህርይ የታናፅ እስፖርተኞችን ናው ክለቡ ግን በዝህ ጉዳይተጠያቂናትን ያጭራል	0
ታዴአችንአጀንዳ እኮ እየተቀበልን ነውላንተ መምከሩ ቢከብደኝም	0
ታድየ የቴኳንዶ ጥበብ እራሱ የለውም ቴኳንዶ እኮ ፍቅር መመማሪያ እንጂ ሰው እያረዱ መጣል አይደለም	0
አይ ታዴ ሲጀመር የቴኳንዶ ችሎታ አለኝ የሚል ሰው እንዴት ከ በላይ ጠባቂዎች ከበውት ነፃነቱን ያጣ ነበር	0
መንግስት ጠባቂ ካነሳለት እንግዲያስ መፈናጠር መጀመር ሊያስፈልግ ነው ጥሩ ማስፈራሪያ ነች	0
አታስመስሉ መጀመሪያ ክፋታችሁን ተው ጎረቤታችሁን ውደዱ እንግዳን ተቀብላችሁ አስተናግዱ ድሀን አታሳድዱ በሽተኛን መኖሪያ እፕታሳጡ ያኔ እንደ ሀገር እግዚአብሄር ይታረቀናል	0
ይህንም ቃል በሰማሁ ጊዜ ተቀምጬ አለቀስሁ አያሌ ቀንም አዝን ነበር በሰማይም አምላክ ፊት እፆምና እፀልይ ነበር	0
የእማአምላክ ልጅ እባችንን ያብስልን ፍርዱን ይስጠን ወገኖቼ አኛም ባለንበት በፀሎት ቆመናል አምላክ በቃቹ ይበለን አሜን	0
እያለቀስን እማ አንኖርም ስራውን እየሰራ ነው በጥቂት ገዜ እናየዋለን	0
አሜን የቅዱሳን አምላክ ፆሎታችሁን ይስማ ልመናችሁንም ይፈፅም ለሀገራችን ሰላሙን ያዉርድልን	0
እር ሆይ የልጆችህን የተሰበር ልብ ትጠግን ዘንድ ሁሉም ወዳንተ እጆቹን ዘርግቷል ከክፉ ሁሉ ትጠብቀን ዘንድ አሜን አሜን አሜን	0
አሜን አሜን አሜን የቅዱሳን አምላክ ፀሎት ልመናችሁን ይስማለሀገራችን ሰላምና ፍቅር ያዉርድልን በሀይማኖታችን ያፅናን	0
በአካል ተገኝተን ለዚህን ቅዱስ ተግባር ባንሳተፍም በመንፈስ ከእናንተ እንደ አንዱ ነን ፈጣሪ ይታረቀን ምህረቱንም ያውርድልን	0
እኛማ ምን አቅም አለን አቅማችን እሱ ለኛሲል ደሙን ያፈሰሰ አጥንቱን የከሰከሰ ጎኑን ያስወጋ በመስቀል ላይ የዋለ ያሁሉ መከራን የተቀበለ መች አመመኘ አለ መች ደከምኩ አለ ያለዉ ነገር ቢኖር የሚሰሩትን አያዉቁምና ይቅር በላቸዉ ነዉየለዉ እኛም አቅማችን የድንግል ማርያም ልጅ ቸሩ መድሀኒያለም ብቻ ነዉ	0
አሜን አሜን አሜን አሜን የቅዱሳን አምላክ ልኡል እግዚአብሄር ፀሎት ልመናችሁን ይስማው	0
ልመናችሁን ስምቶ ለአገራችን ስላም ምህረት ያውርድልን ድንግል ማርያምየአስራት አገርሽን ለክፍዎች አሳልፈሽ አትስጪብን ህዝባችንን ከስይፍ ጠብቂልን	0
አሜን እግዚአብሄር አምላክ ፀሎት ልመናቸውን ይቀበልልን እኛንም በእነሱ ፀሎት ይማርን ይቅር ይበለን	0
ለሁሉም አስተዋይ ልብ ይስት	0
ፀሎት ልመናቸውን እግዚአብሄር አምላክ ይስማልን	0
አሜን አሜን አሜን	0
አምላኬ ሆይ በቃችሁ በለን	0
ልኡል እግዚአብሄር እባክህ ለሀገራችን ሰላምህን ስጣች አቤቱ የአባቶቻችን ፀሎታቸዉን ስማቸዉ አሜን	0
እግዚአብሄር ፀሎት ልመናችሁን ይቀበል አሜን ፫	0
አሜን የቅዱሳን አምላክ ፀሎታቸውን ይስማቸው	0
እግዚአብሄር ይርዳችሁ ወገኖቼ የድንግል ማርያም ልጅ ፀሎት ልመናችሁን አባቶች ምእመናን እሱ ይስማን	0
የጥላቻ ዘር ከምትዘራ አንተም እስቲ ተቀላቀል	0
ሀገሪትዋን ከፈጣሪ ጋር ያጣላት ማን ሆነና የዚ ሁሉ ነውጥ መነሻ የዚ ሁሉ ደም እና ግድያ ዋና ከተማ ጎንደር አየሸደለሽም ወይ ገና ፈጣሪ የእጅሽን ታገኛ ዘንድ የትግራይ እናቶች ፀሎት ላይ ናቸው	0
አቤቱ ምአትህ የራቀ ምህረትህ የበዛ አምላክ ሆይ እባክህ ኢትዬጵያን ጠብቃት	0
እመብርሀን ከልጆ ከወዳጆ ታማልደን	0
አቤቱ የሆነብንን አስብ የድንግል ልጅ ጌታ ሆይ	0
እውነተኛ ሰላም ያለው ከቤትህ ነው	0
ሁሉም ክልሎች የነሱ መንገድ ብንጀምር ጥሩ ነው	0
ጌታ ሆይ ካንተ ወዴት እንሄዳለን ሰላምህን ለሁላችን ስጠን	0
እግዚአብሄር ሆይ እንደኛ ሀጥያት ሳይሆን እንዳንተ ቸርነት መጠን ማረን	0
አዲስ አበቤዎችስ ወዴት ነን ሌላ ከተሞችስ ወዴት ነን ምነው ለበጎ ነገር ብንሳተፍ ሚጠቅመንን ምናለበት ብናቅ አምለመከ እስራኤል ፀሎታችሁን ይስማቹ	0
እመቤቴ ፆለታቹህን ሰምታ ምህረተቶቱን ትላክን አማላጇ	0
አላቅህምደግሞ ከእግዚአቢሄር ጋርወይ ጉድ መልአኩ ተፈራ ያውርድላት	0
በፀሎት የማይፈታ ምንም አይነት ችግር የለም የሀገር ውሀ ልክ	0
መቸምእግዚአብሄር ለአንድ ፃድቅ ሲል ይቅር ይላል	0
በዚች ምድር እንደናንተ አስመሳይ ፍጡር የለም	0
እግዚአብሄር ፀሎታቹን ሰምቶ ለሀገራችንና ለሀይማኖታችን ሰላም ፍቅሩን ያውርድልን	0
በዉሸት ኤከሌን ግደልልኝ ብሎ ፀሎት የለም እግዘብሄር እዉነት ነዉ	0
ሰላምባስ ይሙት እሲኪ በሉን አልሰማንም ከ አም ቦሀላ የተወለዱ ናቸው ማለቲ የተወለዱ ብቻ ናቸው ለፆሎት የወጡት	0
አማራና ኦርቶዶክስነትን መቼም ተያይዛችኋታል አዲሷ የመደራጃ መንገድ መሆኗ ነው ታዲያ ወሎየው ሙስሊም ራሱን ክልል አድርጎ መኖሩ ግድ ሊሆን ነው ማለት ነው ነገሩ እኮ አማራነትን ኦርቶዶክስነት ካደረጋችሁት ቆያችሁ አማራው በብሄር አልደራጅ ብሎ ኢትዮጵያዊነትን ሲያቀነቅንና የሌሎች ሀይሎች መሳሪያ እንዳይሆን ስጋት ሲገባችሁ በሀይማኖት ሽፋን አንድ ሆኖ እንዲቆም ይዛች	0
ፍፍፍፍ በጣም ያማል እውነት እር ይፈርዳል ነፍሳቸውን በአፀደ ገነት ያውላቸው መቼም ሀዘኔን በቃል አልገልፀውም የሁሉም ህዝብ ሀዘን ነው መፅናናትን ይስጣቹ	0
ይህ ቤተሰብ በአካባቢው እጅግ ትጉህ ታታሪና ሞዴል የሆኑ ቤተሰቦች ነበሩ በጣም ያማል ነፍስ ይማር	0
ሰማእትነትን ለተቀበሉ ውድ የተዋህዶ ልጆች ነፍስ ይማር በአብርሀም በይስሀቅ በያእቆብ አጠገብ ያኑርልን	0
ምን ይባላል ነፋስ ይማር በረከታቸው ይደርብን ከማለት ውጭ	0
በየ ሰአቱ ሞቱ ተቀብሩ ማለቱን እሰማለን	0
እግዚያብሄር ነፍሳቸውን በገነት ያኑርልን	0
ምን ብዬ መፃፍ እንዳለብኝ እኳን አላቅም በጣም ነው የከፋኝ ያዘንኩት እግዚአብሄር ነብሳቸውን በአፀደ ገነት ያኑረው ግን ለምን የሰው ልጅ ተውልዶ አድጎ በኖረበት እትብቱ በተቀበረበት አገሩላይ ተጨፈጭፎ መገደልን መስማት በጣም ያማል ያማል ለመላው ቤተሰቦቻቸው እግዚአብሄር መፅናናትን ይስጣቸው ይከብዳል አላቅም አቦ	0
እግዚአብሄር ነፍሳቸው በገነት ያኑርልን	0
በጣም የሚያሳዝን ልብን የሚሰብር ድርጊት ነዉ እግዚአብሄር ነብሳችሁን በቅዱሳን እቅፍ ያድርግልን ለልጆቻቸሁም መፅናናትን ይስጥልን የበሮዳዉ ጊዮርጊስ ፍርዱን ይስጥ ደማችሁን ያውጣ አረመኔ ህዝበ በሏችሁ	0
በጣም በጣም ያሳዝናል እስካሁን በደል እና ግፍ እየደረሰብን ታግሰናል ከጊዲህ የምንታገስበት አቅም እና ትግስት የለነም ነብሳችሁን በገነት ያኑርልን	0
በጣም ያማል ምን አይነት ጊዜ ላይ ነው የደረስነው ፈጣራ በምህረቱ ይጓብኝሽ እምዬ ኢትዮጵያ	0
ነፍሳችሁን አፀደ ገነት ያኑርልን በሰፈሩት ቁና መሰፈሩ አይቀርም	0
እግዝኦ እግዝኦ እግዝኦ መሀርነ ክርስቶስ እምለው ጠፋኝ እናትና አባት ባድላይ ማጣት ምነኛ መራራ ሀዘን ነው ለሊጆቻችሁ እና ለመላው ኢትዮጵያ መፅናናት ይስጥልን ሌላ ምን ይባላል ኡፍፍፍፍፍፍፍፍፍፍፍፍፍ	0
የፈጠራቸው አምላክ ፍርዱን ይላክልን ነብሳቸውን በሰላም ያሳርፍልን ከደጋጎቹ ጋር ከአብርሀም ከይስሀቅ እና ያእቆብ አጠገብ ያኑርልን እውነት አውነት እላችሀለሁ በእኔ የሞተ ህያው ነው እንዳለሁ መፅናናቱን ለወገኖቻቸው ይስጥልን	0
እነዚህስ በእነሱ ከዚህ ከሚያልፈው ከሚጠፋው አለም ቢጠፉም ቢገደሉም በላይ በሰማይ ለዘለአለም ከክርስቶስ ጋራ ህያው ሆነው ይኖራሉ	0
ይብላኝላቸው ለገዳዮቹ ለዘለአለም በማይጠፋ እሳት በገሀነመ እሳት ለሚቃጠሉት ወዮላቸው መከራ አለባቸው	0
ኧፉፉፉፉፉፉየእውነት ከፋኝየወገን ሞተ ያማል ነፍሳቸውን በገነት ያኑርልንወይ ገጥመን በለየልን ነበር	0
ፈጣሪ ነብሳቸውን በገነት ያኑራቸው እያልኩ ነገር ግን በቅማንት ማህበረስብ በአዘዞ ከተማ የአቶ ነጋ ቤተስብ ተገለው በእሳት ሲያቃጥሏችው አንድም የሀይማኖት አባትም ሆነ ሚድያዎች ቀና ብለው አላዩትም ለሁሉም እንዲያስቡ ልቦና ይስጥቸው	0
ለምን ግን ለምን ምን በድለውምን አጥፍተውከእናት ከአባቶቻቸው ከራሳቸው ከጃቸው በልታችሁበተወለዱበት ቦርቀው ባደጉበት በተዳሩበት በተኳሉበት ወልደው በከበዱበት መንደርአዮ አቦ ጉርባ ኦቦለይሲ ብለው በፍቅር በኖሩበት ሌት ተቀን አገራቸውን ለማሳደግ በታተሩበት ሜንጫ ለነሱ እስቲ እንወቃቀስ እውነት እጃችሁ ጨክኖ በነዚህ ንፁሀን ላይ ሜንጫ አነሳ እናንተም አላችሁ እኛም አለን ታሪክ ይወቅሳችኋል	0
ለነሱም ፃድቅ ፈራጅ አምላክ በቅርቡ በፅድቅ ይፈርድላቸዋልያለ እናት ያለ አባት ያለ አያት ያለ ወንድም ያለእህት ስንቱን አስቀራችሁ እግዚአብሄር ፍርዱን አይንፈጋችሁ	0
አምላኬ ሆይ ከሀዘንም ሀዘን ይለያል ይሄን ምን ይባላል አንድ ሀገር ያውም አንድ አካባቢ አንድ አይነት ኑሮ እየኖርን እንዴትስ እጃቸው እሺ አላቸው እንዴትስ ነው ስውን ሚያክል ነገር እንደዚህማድርጉ ያውም በወንድምህ አባትህ እናትህን በሚይክሉት ላይ	0
ለቤተሰባቸው ፅናት ይስጣቸሁ እግዚአብር ሰው ሰውን የጠላበት ዘመን ለምን ይሆን ዘላለም የሚኖር መስሎት ይሆን እዚች ምድር ላይ	0
ግን ለምን ኢትዮጵያ ሆኑ ኖረው ኢትዮጵያዊ ቢሆኑ አይሻልም ነበር ለምን ቢባል ኢትዮጵያዊነት ሱስስለሆነ እንደዚህ ብለውን ነበር መሪዎቻችን እኛም አምነን መስቀል አደባባይ ላይ ሞታቸውን ሞትንላቸው እነሱ ግን ያንን ሁሉእረሱና ዳግም ይገሉን ዘንድ ተነሱ	0
ጎበዝ ማብላት ማጠጣቱ ማሳደሩ ይቅር ግን ይሄ ሁሉ ህዝብ ሲያልፍ እንዴት የአንድ ቀን ሀዘን አይታወጅም ያሳዝናል	0
ግዚአብሄር ነብሳቸውን ይማር	0
እህህ እስከመቼ	0
እነሱ አልሞቱም የሞቱት ገዳዮቹ ናቸው ለምን ነፍስን አልገደሉም መገድል የቻሉት ስጋን ብቻ ነው የናተስ ሞት ምን አይነት ይሆን የስጋ ሞት አይደለም የነፍስ ሞት አለባችሁ ነፍሳቸውን በገነት ያኑር	0
ፈጣሪ ነፍሳቸውን ይማር ለገዳይም የሚስኪን ደም አሁን ቢያፈሱ ቁናው ተመላሽነውቢያውቁት ከሰው የተፈጠረ ሰው ሰውን ማጥቃት አለማገናዘብነው ለሁሉም ቀን አለው ዱኒያ ተዘዋዋሪናት	0
አማራነት ማተብ እንጅ ሞትየሚገባው ዜጋ አይደለም የሞቱት የወገኖቻችንንደም የዘካርያስን ደም በመሰዋው የተቀበልህ የንፁሀንአማኞች ስለስሜ ያሳድዱችሆል ይገድሉችሆል የተባለው የወንጌ ል ቃል	0
በጌታችንበመዳኔታችንበኢየሱስክስቶስ ስምማመናቸው በአላውያን አህዛብ እጅ ህይወታቸውን ያጡ የወገኖቻችንን ነፍስ በአብርሀምበይሳቅበያእቆብ አጠገብ እንድታስቀምጥልን ፀሎቴ ነው	0
ወደ ሀማኖት ጠጋጠጋ አያስፈልግም እጅ ነው ፍድዮም ፍዳሆም በከመ ምግባሪሆም ነው ትናንትና ምእመናን መርጀታ ሳይቀር የተገደሉ ሳ የእሄር ልጆች አይደሉም ማለት ነው	0
እኛ ባልሰራነው ስራ የውሸት ሀውልት ይሰራብናል አሁን የእውነት መታረድ በኛ ላይ ሲደርስ ምን እናድርግ የበቀል አምላክ እግዚአብሄር ይበቀለቸው	0
ነፍሳችውን ፈጣሪ በኢዶም ገነት ያኖራት ስለሁሉም ነገር ፈጣሪ አንድቀን መልስ አለው የሰውን ለጅ በስለት የገደለ እራሱ በስለት ይገደላል	0
የሰው ደም ያፈሰሰ ደሙ ይፈሳል ነፍሳችሁን በገነት ያኑረው ወገኖቼ	0
አረ በስቱ አቤቱ ይቅር በለን	0
አቤቱ ማሀረነን	0
አቤቱ አይኖችህ ወደኛ አብራልን አላወቁም እጅ ኢትዮጲያ እኮ ሀገረ እግዚአብሄር ናት	0
ይህ አሳዛኝና አሳፋሬ ድርጌት ያየነውና የሰማነው አሁን ጃዋር ከገባ ነው ይህ ምን የኦሮሞ ልጅ ተግባር ነው ወተት የሚያጠጣ እርጎ የሚያበላ የሌላ ልጅ ከራሱ አስበልጦ የሚንከባከብ ኦሮሞ ልጅ አይደለም ለምን እምየ ምንሊክን ይቃወማል መቃወም የለበትም እርሱ የኦሮሞ ልጅ ሳይሆን የጥልቁ መንፈስ የሉሲፈር ልጅ ነው ኢትዮጵያ ቂም አታውቅም በግዜ ይቅርታ ጠይቅ ካልሆነ ኢትዮጵያ ስትፈርድ አልከስክሳ ትደፋሀለች	0
ከሰማእቱ ቅዱስ እስጢፋኖስ እቅፍ ያኑራች	0
እግዚአብሄር ሆይ ምናለ በቃህ ብትለን እግዚአብሄር ነብሳችሁን ይማር	0
ትክክል ምንም ውሸት የሌለበት	0
ነፍሳቸውን በገነት ያኑርልን	0
ፈጣሪ የት ነህ ይህንን ግፍ ዝም አልክ አረ ድረስ	0
ጌታ ሆይ እናት አባታቸውን ላጡ ህፃናት አንተ ራራላቸው ጌታ ሆይ አንተ ድረስልን ይቅርም በለንነብሳችዉን በአፀደ ግነት ያኑርልን ግዳዮቹንም እግር ይፋርዳችዉ እነዚ የቀን ጀቦች ናችዉ	0
ጌታ ሆይ እናት አባታቸውን ላጡ ህፃናት አንተ ራራላቸው ጌታ ሆይ አንተ ድረስልን ይቅርም በለን	0
ነፍስ ይማር በውነት ያማል ፍርድን ፍጣሪ ይስጥ	0
አቤቶ ፈጣሪ ይቅርቀለነ አንተ አስበን የሞቱትን ነብስ ይማር	0
ነፍሳቸውን በአፀደ ገነት ያኑራቸው ፈጣሪ	0
በጣም ያሳዝናል እግዚአሀብር ነፍሳቸውን በገነት ያኑርልን	0
እግዜአብሄረ ነፍሳቸውን በአፀደ ገነት ያኑረልን	0
እግዚአብሄር ነፍሳቸውን በገነት ከነ አብርሀም ይህሳቅና ያእቆብ ጎን ያሳርፍ አሜን	0
እግዚኦ መሀረነ ክርስቶስ አተ ፊትህን መልስልን ልጅ ያለእናትናባት እናትናአባት ያለልጅ አስቀሯቸዉ እግዚአብሄር ሆይ አተ ፍረድ ሌላ ፉራጅ የለንምና ነፍሳችሁን በገነት ያኑርልን ለቤተሰቦቻችሁ መፅናናትን ይስጥልን	0
ነብስ ይማር የጭካኔ ጥግ አቤት ጉድ	0
ሰማእታት	0
ሰይፈኞች በሰይፍ ይጠፋሉ እግዚያብሄር መልስ አለው ይችን መሪ አልባ ሀገር ፈጣሪ ይጠብቃት የሞቱትንም ነፍስ ይማር	0
ሰው የዘራውን ያጭዳል ለእያንዳንዱ ፈጣሪ የስራውን ደሞዝ ይከፍላል	0
ያማል ንፁሀን ዜጎች ላይ እንዲህ ያለ ግፍ	0
ነፍስ ይማር በውነት ለእምነት መሞት መታደል ነው	0
እግዚኦ አምላኬ የሆነብንን አስብ ነብስ ይማር	0
እግዚሆ ማርና ክርስቶስ ገታሆይ በምህረት ጎብኘን	0
ወደት ነው ሀገርየ አየ ሰው አመት እማንኖርባት ምድር	0
ጌታሆይ ወዴትነው ያለህው ነፍስ ይማር	0
የሰማእታቱን ደም የሚያፈሱትን እግዚአብሄር ይበቀላቸው	0
ነፍሳቸውን በገነት ያኑርልን ሊላ ምን ይባል ይሆን እፍፍፍፍፍፍፍ	0
አቤቱ ጌታ ሆይ ስለናትህ ብለህ ማረን እራራልን	0
አቤት ፈጣሬ ነፍሳችሁን በገነት ያኑረው	0
እግዚኦ መሀርነ ክርስቶስ ነብሳችውን ከቅዱሳን ተርታ ይጨምርልን	0
ያሳዝናል በጣም ሰው በግፍ እየሞተ መግለጫ የማይሰጥ መሪ ነው ያለን ምን ይደረግ	0
ነፍስ ይማር የንፁሀን ደም በከንቱ ፈሶ አይቀርም	0
አገራችን ላይ ለመኖር ዋስትና አጣን	0
ነብስ ይማር በዉነት ያማል ያስቀቅቃልም ምን እደምል አላዉቅም የትንቢት መፈፀሚ አታድርገን ጌታ	0
ደማቸው ወደ እግዚአብሄር ይጮሀል	0
አምላኬ አንተ ፍታው እኛ ምን አቅም አለን	0
ወይነ ወንድሞቸ በአገራችን ላይ ለመኖር ዋስትና አጣን	0
ምንም ቃል የለኝም ፍርድን ፈጣሪ ይስጥ	0
እግብሄር ነፍሳቸውን በገነት ያኑር	0
ይዘገያል እንጅ እር ፍርዱን ይጣቸዋል	0
ኛው ሰአት ላይ ደርሰናል ሁሉ እንደየስራው የሚያገኝበት በክርስቶስ ወንበር ፊት ዋጋችን የምንቀበልበት ሰአቱ አሁን ደርሰዋል	0
ኸረ የመንግስት ያለህ መግለጫ በመስጠት የማረጋጋት ስራ ይስራ በፍጥነት የሚሞቱ ሰዎችን ህይወት ይታደግ እር ሆይ ሰላምን አምጣልን	0
አገራችን መሪ የላትም ቢባል ይሻላል ሰው ተወልዶ ባደገበት አገር እንደወንጀለኛ እየታየ መፈጠርን የሚያስጠላ ጊዜ መጣብን እግዚኦ አምላኬየሰው ልጅ እንደ በግ እየታረደ ድንግል ማርያም አስራት አገርሽን አስቢያት	0
ጌታሆይ ፈጥነህ ድረስልን ይቅርም በለንለአረመኔወች ልቦና ስጣቸው ወደቀልባቸው መልስ	0
ልባችን ደክመ አእምሮአችን ዛለ አምላክ ሆይ ፍርድህ ይቅረበን	0
ከእለት ወደ እለት እየወረድክ ነዉ እና እባክህ ወንድሜ ሚዛናዊ ሁን	0
ያሳዝናል ግን በቅማንት ላይ እየተፈፀመ ያለውም ይኸው ነው በራስህ ላይ ስደርስ ብቻ ሳይሆን ለሌላውም ጉዳ አለማድረስና ከደረሰም መከላከል ይልመድባችሁ	0
እባካችሁ የአማራ ክልል ባለስልጣኖች እና በፌደራል አማራን የወከላችሁ ባለስልጣናት እባካችሁ በማንነነታቸው ምክንያት ለሚያልቁ ወገኖች ቁሙ ወይ ካልቻላችሁ ከአላፊነታች ውረዱ ህዝቡ በየቦታው ያለው ህዝብ ወደ ሰላም የሚሆንበት ቦታ የሚቀሳቀስበትን ሁኔታ አመቻቹ	0
ብዙ ንብረት አፍርቶ ከመቀመጥ ክላሽ መግዛት ወሳኝ ነው ይህ ሁሉ ሰው ቢኖረው ኑሮ በቀላሉ የዝብ መንጋውን ማስታገስ ይቻል ነበር	0
አቤቱ ጌታ ሆይ የሆነብንን አስብ የምህረት እጆችህን ዘርጋልን	0
የአማራው ወኪል ስለሌለ እንደፈለጉ ይሁኑ	0
ከፈጣሪ ሌላ ማን ይድረስላቼው ጠቅላያችን ሰምቶ ዝም ጪጭ ብሎል ተብሎአል	0
ልኡል እግዚሀብሄርምህረቱን ላክልን ነብስ ይማር	0
የዘመኑ የከፋ ሰቆቃ አምላክ ሆይ ይህንን ግፍ ተመልከት	0
እግዚአብሄር እንደ ሀጥያታችንስራችንሳይሆን አንደ ቸርነተህ አድርግልን ይቅር በለን	0
ልኡል እግዚአብሄር ሆይ ስለ እናትህ ስለ ድንግል ብለህ በቃችሁ በለን	0
መሪ ከሌለ ሀገር እንዲ ነው ምንም ማድረግ አይቻልም	0
አንድ ቀን ዋጋ ከፋይ ይሆናሉ	0
ጌታሆ የሆነብንን እየተደረገብን ያለውን አስብ	0
ሀረር የተ አካባቢ ነው ይህ የሆነው	0
መከላከያ ገብታል አይባልም እንዴ	0
ኧረ ለማን ነው አቤት ሚባለው	0
አምላኬ ሆይ ይህ መርዶ መቸ ነው እሜአበቃ እግዚአብሄር አምላክ ይድረስላቸው	0
እኔ እሚገርመኝ መንግስት ግንአለ	0
እር ያሳዝናል ይህ ትግባር ሰውኛ አይመስለኝም	0
የ አመት መካካሻ ነው	0
እግዚአብሄርሆይምረቱንላክልን	0
እግዚአብሄር ይድረሰላችሁ	0
ፈሪሀ እግዚአብሄር የሌለባቸው ሰዎች ሚኖሩባት	0
ህዝብን በጅምላ በዚህ መልክ መፈረጅ የህዝብ ጠላትነት እንጂ ህዝብ ከህዝብ ጋር ተከባብሮና ተባብሮ እንዳይኖር የሚያደርግ መርዝ ነው ከእንዲህ አይነት አስተሳሰብ መውጣት ነው የሚጠቅመው	0
ጥቂቶች ባጠፉ ህዝብን በዚህ መልክ መፈረጅ ተገቢ አይደለም እንዲህ ብለን አይደለም የህዝቦችን አብሮነትን እያረጋገጥን ለመሄድ የሚንችለው እስኪ ኢትዮጵያ ውስጥ የትኛው ህዝብ ነው በውስጡ አጥፊዎች የሌሉበት ሀሳቦቻችን ህዝብን ከህዝብ ጋር የሚያጋጩ መሆን የለበትም	0
ዉድ ወንድም የኦሮሞ ህዝብ የሌለበት የኢትዮጵያ ምድር የለምይህ ማልት የህዝቡ ማህበራዊ ህይዉት ስር የሰደደ ሰለመሆኑ የሚያመለክት ብቻ ሳይሆን ለሌሎች ቤሄረ ብሄረሰቦች ጥሩ ልምድ ልሆን የሚችል ጨምር ነዉ	0
በአጠቃላይ ዛሬ ኢትዮጵያዊነትን የሚያቀነቅን የኦሮሞ ህዝብ ስም ለማጥፍት የሚደረግ ዘመቻ ምክንያታዊነት የሌለዉ ጉዳይ ነዉ	0
የንፁሀኑ ደም አንደ አቤል ደም በእግዚአብሄር ዘንድ ትጮሀለች ነፍሳቸውም በገነት ትኖራለች ነፍስ ይማር	0
አትሳሳት ወዳጄ ስንት አለን ከኦሮሞ ተወልደን ኢትዮጲያዊነት በደማችን የሚራወጥ ነገሩ አልገባህም ኦሮሞ ስላልሆነክ አይደለም የጃዋር ጭፍሮች ሰው የሚያርዱት ተዋህዶ ስለህንክ ነው የምትታረደው እኛ ክርስትያን የኦሮሞ ተወላጆች በተለይ ሸገር ላይ ተወልደን ያደግን በኢትዮጲያና በተዋህዶ ቀልድ አናውቅም	0
ኦሮሞ ኢስላሚክ እስቴት እንመሰርታለን ብለው ደፋ ቀና የሚሉ ውሀቢላዎች ናቸው እንጂ የሰው ልጅ ከመሬት አንስቶ የሚያሳድግ ባለሀገር ኦሮሞን አብረህ አትጨፍልቅ	0
አንተ ሰውዬ የምታወራውን ነገር ብትጠነቀቅ መልካም ይመስለኛል እኔ ኦሮሞ ነኝ ግን ፈሪሀ እግዚአብሄር አለኝ ኢትዮጵያዊነቴን ለአንዲት ሰኮንድ እንኳን ዘንግቼው አላውቅም ከኦሮመነቴም ጋር አልተጋጨብኝም አንተ እዛ ሆነህ በፎቶ አይተህ የምታዝንላቸው ሰዎች እኔ በአይኔ አይቻቸው ልነግርህ ከምችለው በላይ ልቤ ደምቷል የተቻለኝንም ሁሉ እያደረኩም እገኛለሁ ይልቅ አጠገብህ ልታፀዳቸው የሚገቡ ነገሮች ስላሉ ተፍ ተፍ ብትል መልካም ነው	0
ሰው ዝም ብል እግዚአብሄር ዝም አይልምበርግጥም የምህረት አምላክ መሆኑን አውቃለሁ ግን አቅም አጥቶ በጣር ውስጥ ያለውን የፈጠረውን ነፍስ ለአጋንንት መጫወቻ አያደርግም	0
ስማ በኦሮሞ ስም የሚነግዱትን ለይተህ አውጣ ሚሊዮን ኦሮሞን በትናንሽ አስተሳሰባቸው ጠላታቸው በሆኑ ሰዎች ሁሉንም ልትወቅስ አትችልምፍቅርን ስበክ የአቤል ደም ከፀባኦት ይጮሀልበቀል ደሞ የእግዝአብሄር ነው	0
ወንድሜ ታደለ ይሄን ጦማር ስትጦምር እያለቀስክ ሊሆን እንሚችል እገምታለሁ ምሬትህ የይገባኛል ነገር ግን ፅሁፍህን እኔን ጨምሮ ብዙ ሰዎች ያነቡታል ስለዚህ አንዱ ወንድሜ እንደተናገረ በጥንብ ሽታ መካከል ዝንቦች እንዳሉ ሁሉ በምርጥ አበባ መካከል የሚውሉ ማርን የሚሰጡ ንቦችም እንዳሉ አትዘንገወንድሜ አንብበኸው ማስረጃ ከጠየቅኸኝ እውነቴንነው ወንድሜ ማንነቴን እና የተደረገልኝን ምን አይነት ሰቦች እንዳሉ አሳይህአለሁ እንደምታነበው እና ልትረዳኝ እንደምትሞክር ተስፋ አደርጋለሁ	0
ወቅታዊ ችግር አማራ ክልልም እንዳለ ኦሮሞ ክልልም አለ	0
ወዳጄ በሀገራችን እየሆነ ያለው አንገት_ያስደፋል በፖለቲካ ቁማርተኞች ወገኖቻችን በወጡበት ቀርተዋል መሪር ሀዘን ነው በዚህ አጋጣሚ በዚህ ሴራ የተጠለፉ ብዙዎች ቢሆኑም በዛው ልክ ለሀገራቸው የሚሞቱ ከህዝባቸው ጋርም እያለቀሱ ያሉ ብዙ ኢትዮጵያዊ የኦሮሞ ልጆች አሉና እባክ_ወዳጄ በጅምላ አትፈርጅ አትጥላ	0
ፈጣሪ ቸሩ መድሀኒያለም በግፍ የተጨፈጨፉትን በአፀደ ገነት ያሳርፍልን	0
ለጋሞ አባቶችና ወጣቶች ለመላ ለጋሞ ህዝብ ሀዘኑ መሪር ነው ከልባችን አዝነናል እንዲሁም በአዳማ ለሞቱ የተለያየ የኢትዮጵያ አካባቢ ልጆች ሀዘናችሁ ሀዘናችን ነው	0
በጥቅሉ ኦሮሞን መወንጀል ስህተት ነው ኢትዮጵያዊነትም ሆነ ሰብአዊነት የማይጋጭባቸው ብዙ ወዳጆች አሉኝ ወርቅነህ ወንድሜ ንዴትህን ተቆጣጠረው በእርግጠኝነት ይህን መጥፎ ግዜ እናልፈዋለን	0
ዝዘህ ላይ ፈጣሪ እሱም የሰማይ ንጉስ ይፈርዳል ዝምም አይልም እንደት እንኑር ወገኔ የት እንሂድ ምነው ድሮ ጣልያን በገዛን	0
መፅሀፈ ምሳሌ	0
እግዚአብሄር የሚጠላቸው ስድስት ነገሮች ናቸው ሰባትንም ነፍሱ አጥብቃ ትፀየፈዋለች	0
ትእቢተኛ አይን ሀሰተኛ ምላስ ንፁህን ደም የምታፈስስ እጅ	0
ድፍን ኦሮሞን በዚ አትፈርጀው ከኢትዮጰያ ጋር ታሪክ ያላቸው ቱለማና መጫ ውስጥ እንዲሁም ያዲሳባ ኦሮሞ ለእምነቱና ለሀገሩ የሚጋደል ሞልቷል	0
እኔ የሚገርመኝ ምን ያስፈልጋል ሀሉን ኦሮሞ እንዲህ መጨፍለቅ በጥላቻ ደሞ በተቻለን መጠን ጥሩ ያልሆኑ አባበሎች ላለማለት መሞከር ዋጋ ያስከፍላሉና ይህን ስል የደሀው ልጁ ይጎዳል እንደምናየው ትነሽ እናስብበት	0
የኦሮሞን ህዝብ በጅምላ መኮነን ስህተት ነዉጥቂቶች በፈፀሙት ህዝብን መፈረጅ ይቁምህዝቡማ የተራበን አጉራሽለተጠማ ወተት አቅራቢ ነበር አድራጊና አስደራጊዉን ኮንኑ ከህዝቡ ላይ ግን ብእራችሁን አንሱ	0
ኦሮሞ የወሀ ህዝብ ደግ ክፋት የሌለበት ከብዙሀኑ ጋር ተስማምቶ ወዶ ተጋብቶ የሚኖር ምስጉን ህዝብ ነው ምን አበላሸው ካልክ ሰው ማመኑ ነው እሴቱን የዋህነቱን ሰው ማመኑን እግዚሀብር ግን የስራቸውን ይስጣው ዳኛው እሱ ነው	0
ታደለ ጥበቡ እንደዚህ ካሰብክ ዘመዶችህ ሁሉ በክልሉ እንደ ሙጫ ተጣብቀው ገነት የገቡ ያክል ሲኖሩ ከዚያ ወጥተው አንተ የሚታከብረው ክልል ውስጥ እንዲኖሩ አትመክርም	0
ኦሮሞ ሲባል በሚለው ሁሉንም ያጠቃለለ ሀሳብ ለማንም አይጠቅምም ኦሮሞነታቸው ከሰውነት ተፈጥሮአቸው ከኢትዮጵያዊነት ማንነታቸው የማይጋጭባቸው ብዙ አሉ ከሞቱት ወገኖቻችን ጋር እነርሱንም አብረን አንቅበራቸው	0
ገዳይች ከኦሮሞ ህዝብ የወጡ ሊሆኑ ይችላል ሁሉም ኦሮሞ ገዳይ አይደለም ወንጀለኛን ከብሄር ጋር አናገናኛቸዉ አርሲ ላይ አዳማ ላይ ወዘት ቤተክርስቲያን እዳትቃጠል ሲከላከሉ የነበሩት ኦሮሞች ነበሩ ሁሉንም በአንድ አይን አንመልከት	0
ወንድም ዘር በፀሎት አይቀየርም የምትዘራው መርዛማ ዘር ለብዙ ትውልድ ይተርፋልና ተው እረፍ	0
ጥቂት ደደቦች እና የታሪክ አተላወች የሰሩትን ሰይጣናዊ ስራ በጥቅሉ የኦሮሞ ህዝብ ማለት ትክክል አይደለም	0
እግዚአብሄር ይፍረድባችሁ የስራችሁን ይስጣችሁ በንፁሀን ደም እንደቀለዳችሁ የጃችሁን ታገኛላችሁ	0
ጌዜ ይፈርደናል ያኔ	0
እግዚአብሄር ዝም አይልም ይፈረዳል	0
እኔግን ፈራው የማየው ነገር ሁሉ ያስፈራል	0
ጉሙዝ የፈጀው ማነው	0
ደካማ አስተሳሰብ ነው እንዲህ አይነት ድምዳሜ ካለህ ካንተ በላይ ጨካኝ የለም ጭካኔና ክፋት ብሄር የለውም	0
አረ ጎበዝ ወዴት እየሆድነው ቆም በለን እናስብ ፈጣሪ ነብሳችሁን በገነት ያኑርልን ያማል የሰው ሞት ያማል	0
ታዴ ከብሽሽቅ ውጣ ሁሉንም በጂምላ አትፈርጅ ብዙ ድንቅ ኦሮሞዎች አሉ ፕሮፌሰር ፍቅሬ ታዬ ቦጋለበጣም ብዙ	0
እግዚያብሄር መልስ አለው ወገኔ ያማል መፀናናቱን ይስጣቹው	0
እግዚአብሄር ሆይ አምናለሁ አንተ በዙፋንህ ላይ ነህ ፍርድህን እንጠብቃለን	0
በትክክል የኔንም አሳብ ነው የገለፅክልኝ	0
ያማን ያማን ግን እስከመቸ እያለቀስን እደምንዘሎቅ ብቻ ያማል ይፍስ ይማር እግዚኦ	0
የሞቱትን ወገኖቻችን ነፍስ ይማር ገዳዮቹም ፍርድ ከእግዚአብሄር ይሰጣቸው	0
ጎንደርን ጨምረህ ተናገር	0
ምን ማለት ይቻላል ነብስ ይማር አምላካችን	0
ጌታዬ እየሱስ ክርስቶስ ሆይ ይቅር በለን ታረቀን ነብስ ይማር	0
አሁን ያልከዉ ተ ግባር ሁሉም ክልሎች ላይ የተፈፀመ ነዉ	0
ኧረ ምን አይነት ጭቃኔ ነው ኦአምላኬ ሆይ እባክህ የሞቱትን ነብሳቸውን በአፅደ ገነት አኑርልን	0
የዋሆች ነበሩ በነዚህ መጥፎ እንዱሆኑ አድርገው በህዘብ ጭንቅላት ተቀርፀዋል	0
ከ ኦሮሞ ውስጥ እነ አብይ እነ ለማ ወተውባታል ግን ፐርሰንቱ የሇሊት ነው የሚያስበው	0
ወይ ወንዲሜ እስክ በነክ እጂህ	0
ሰለ ቅማንት የሄነ ነገር በለን	0
ይመስለኛል ሳይሆን ነው እንጅ	0
መንግስት አለን ግን ነፍስ ይማር መስዋትነት ለከፈሉት	0
እግዚአብሄር ጥናቱ ይስጠን እዲት ነው የሚያመው	0
ታደለ ጥበቡ እግዝአብሄር ለኢትዮጵያ ህውሀት ጣለባት ስትል አልነበርክም አሁን ወደ ኦሮሞ ዘረክ	0
እግዚአብሄር ነፍሳቸውን በገነት ያኑርል	0
ፍርድ ማግኘት ያለባቸው ፍርድ እያገኙ አይደለም በጣም በሚያሳዝን ሁኔታ በአግባቡም ፍርድ እየተሰጠም አይደለምስለዚህ እግዚያሀቤር ለሁሉም በሰራው ልክ በስጋው ፍርድን ያግኝ እንዲውም ለሀገራችን በሙሉ ታማኝነት የሚያገለግል እና ህዝብም የሚገዛለት ብልህ እና አስተዋያ መሪ ይስጠታት	0
እግዚአብሄር ነፍሳቸውን በገነት ያኑርይሁን ይደረግልን	0
ሰው ፍርድ አይሰጥምፈጣሪ ዛሬነገ ሳይል ፍርዱን ይስጠው	0
ፈጣሪ ነብስ ይማር በሰዉ ሞት መገፋት ምትስቁ	0
እግዚሀብሄር ተዋጊ ነዉ	0
ወገኖቼ ነፍሳችሁን በአብርሀም በይስሀቅ አጠገብ ያኑርልን በረከታችሁ ይቆየን	0
ነፍሳቸውን በአፀደ ገነት ያኑርልን አሜን	0
ግድያዉ እንደ ኤሮድስ ዘመን ሆነ ያስገደሉ ስዎች በጥብቅ ይያዙልንየሞቱት እህት ወንድሞቻችን በአፀደ ህይወት ነፍሳቸውን ያኑርልን	0
ያሳዝናል ፈጣሪ ሆይ ወንድምህ አቤል ወዴት ነው በል ፍርድህም ይውጣ	0
አምላክ ሆይ ለኢትዮጵያ የገባህላትን ቃል አስታውስ	0
እንፁም እንፀልይ ፍርዱን ባይናችን እናያለን	0
ሞታቸው እጅግ ያማል ነገር ግን ለተፈጠረው ችግር ተጠያቂው መንግስት እንጅ ጁሀር አይደለምእሱን ለመግደል ያሴረው ማነው ይህን መቃወም እኔን በጣም የሚገርመኝ ደግሞ እናንተ ቅማንትን በማንነታቸው ምክንያ መተማ ሽንፋ ጭልጋ እና ጎንደር እጅግ በጣም አሰቃቂ ግድያ ጁሀር ዘግቦ ጉደችሁን ስላወጣው በዚህ አጋጣሚ ዛሬ እሱን አሳስሮ ነገ የተለመደውን ቤት ሰው ዘግቶ በእሳት ስሆነ ማንም ማንም አይሰማችሁም እላለሁ ደምፅ ብትሰበስቡም ማንም አይዘውም ይህነ ደግሞ ነገ አበረን አናየዋለን	0
አትልፍ ታዴ መቼም ለፍርድ አይቀርብም ኧረ እንዲያውም ማንም አይነካውም ልንገርህ ግዜህን በደዚህ አይነት ጉዳይ አታጥፋ ምክንያቱም ኢትዮጵያ መንግስት የላትም የሚገርምህ በዚህ አመት ውስጥ መንግስት ኖሯት አያቅም ሁሉም የምእራብያኖች የበኩር ልጆች ናቸው ስለዚህ በቃ አትልፋ ዝም ብለህ አትጃጃል እንዲያውም እውነት እልሀለሁ	0
ማኔቴቄል ፋሬሰቀለን ተገኝን እርም ለጥላት አሳልፎ ሰጠን ነሰሀ እንግባ እንዘጋጅ ይህ የጣር መጀመሪያ ነው ሰውን ሰው የሚቀብረው አያገኝም በዚህ ከቀጠለ የሞቱት እድለኛ ናቼው በረከታቸው ይድረሰን ዋለኛ	0
ይሀ አዉን ሆኖ ካልታየ ያለን አምነት ሁሉ ገደል ገባ ማለት ነው	0
ጎበዝ እሄ ጎጠና እና ለኢትዮጵያ የማያስብ ዘረኛ ከአሁን በኋላ አያስፈልገንም የወንድሞቻችን ስቃይ ሞት የምናስብ ከሆነ ከአሁኑ እንጩህ አላህን እንለምን	0
የኛ ሀገር መንግስት ዝም ቢል የአለም አቀፉ ፍርድ ቤት ዝም አይልም	0
ነብሳቸውን በአፀደገነት ያኑርልን ነብስይማር አምላኬ አንተ ደማቸውን ተበቀል እውነት ያማል ይሄአውሬ በላቸው	0
እግዚኦ መሀረነ ክርስቶስ ይሄ ጂብ የሰው ደም አልጠግብ አለ ፈጣሪ የስራውን ይስጠው	0
ከኢትዮጵያዊያን የማይጠበቅ ጭካኔ እውነት ግን ኢትዮጵያዊ ናቸው ታድያ ለምን ጨካኝ ሆኑ በሴት በህፃናት ይጨከናል	0
ኧረ ተው ህግ መቅረቡ ጥርጥር የለውም ነገር ግን ወቅቱ አይደለም ድጋሜ አሁን እሱን መነካካት ሁከቱን ማባባስ ስለሆነ ይህ አይነት ፖስት ብታዘገዩት ጥሩ ነው	0
የቄሮን ጭካኔ መነሻ ምንጩን ለማወቅ የኦሮሞን ህዝብ የኋላ ታሪክ ማወቁ ብቻ በቂ ነውበወቅቱ የአይን ምስክር የነበሩት የበርበራ ገዳም አበምኔት አባ ባህርይ ዜናሁ ለጋላ ብለው የፃፉትን መፅሀፍ ማንበብ ብቻ በቂ ነውመፃሀፉ ቴሌግራም አድራሻ ላይ አውርዳችሁ ማንበብ ትችላላችሁ	0
አምላክ ሆይ ይህን ሁሉ በደል አንተው አቅልልን የሞቱትን ነፍሳቸውን በምንግስት ሰማየት አኑርልን	0
ኧረ ሌሎችም አሉ ወንድም	0
በባሊሮቤ እና በዶዶላ በፃድቁ አቡነ ገብረክርስቶስ አመታዊ ክብረ በአል ዋዜማ በጃዋር ተከታዮች ሰዎች የተገደሉ ሲሆን የአራቱ የቀብር ስነ ስ ር አት ዛሬ ተፈፅሟል	0
ነፍሳቸውን በሀፀደገነት ያኑራቸው ለመላው ቤተሰቦቻቸውእና ለመላውወዳጅ ዘመዶቻቸው መፅናናትን እመኛለው	0
በረከታቸው በሁላችን ላይ ይደር	0
ነፈሳቸው በአፀደ ገነት ያሳርፍልን	0
የተዋህዶ ሰማእቶች ነፍሳቸውን በአፀደ ገነት ያኑርልን	0
እንግድህ ምን እንላለን ነፍስ ይማር ብለን ዝምምምምምም ነው እንጂ ፈጣሪም ዝምምም አለ ቃሉ ይፈፀም ዘንድ ግድ ነውና	0
ሰማይና ምድር ያልፋሉ ቃሌ ግን አያልፍም እንተባለ	0
ነፍሳችሁ እግዚአብሄር አምላክ በአብረሀም እቅፍ ያኑረው	0
ይብላኝ ለገዳዮቹ ፍርዱን ከጌታ ለሚቀበሉ እነሱስ ቢኖሩም የክርስቶስ ቢሞቱም የክርስቶስ ስለ ክርስትና መሞት ትልቅ በረከት ነው በረከታቸው ይድረሰን እኛንም ለዚህ ክብር ያብቃን	0
ኡፍፍፍፍ ፈጣሪ ደማችሁን ያያል ነፍስ ይማር ተብሎ ዝም የሚባል ነው	0
አሜን ነፍሳቸውን በገነት ያኑርልን ለቤተሰብም መፅናናት ይስጥ	0
ነፍሳቸዉ በገነት ያኑርልን ፈጣሪ ሌላ ምን ይባላል ያሳዝናል	0
እሜን ነፍሳቸው በገነት ያኑርልን ለቤተስብም መፅናናትይስጥ	0
እዉነት የንፁሀን ደም ይፍረድህ የህፃናት እንባ ይፍረድህ የህፃናት ደም ይፍረድህ እግዚአብሄር ይዘገያል እንጅ መልስ ይሰጣል	0
የቅዱሳን አምላክ ነፍሳችሁን በገነት ያኑራት	0
አሜን አሜን አሜን ነፍሳቸውን በገንት ይኑርልን ለቤተስብም መፅናናት ይስጥ	0
ነፍሳቸውን ከፃድቃን ከሰማእታት ጋር ያኑርልን	0
እግዛቤሄር ነፈሳቸውን በገነት ያኑርልን የንፁህ ደም ያፋርድ	0
የናቡቴን ደም የተበቀለ አምላክ ስለ እናንተም ዝም አይልም ነብሳችሁ በፃድቃን ጎን ይረፍ	0
እግዚአብሄር ሆይ ነፍሳቸውን ተረከብ	0
ገዳዮች እንደስራቸዉ እግዚአብሄር ይፍርድባቸዉ ሞት ለገዳይ ሰው ስጋዉን እጂ ነብሱን መግደል አይችሉም ክርስቲያን ቤታችን በሰማይ ቤትነ ነው	0
ነፍሳችሁን ከቅዱሳኑ ጋር ይደምርልን	0
ክርስቲያን ሆኖ መምት ጥቅሙን ቢያውቁት ኖሮ መች እንዲ ባላደረጉ ልቦና ይስጣቸው	0
ነፍስ ይማር ይዘገያል እንጅ እግዚያብሄር ዋጋቸው ይሰጣቸዋል እንዲህ የሰውን ህወት የሚቀጥፉ	0
ሰማእትነት ተቀብለዋል ግን ለገዳይ ጨልሞዋል ነብሳቸው በገነት ያኑርልን	0
ነፍስ ይማር ገጃዮች ዛሬ ተደሰታችሁ የዘላለም ሂወትን ነዉ ያጣችሁ እርግጠኛ ነኝ አሁን ደስተኛ ናችሁ እግዚያብሄር ፍረድ	0
ኡፍፍ እረ ያማል በከንቱ የፈሰሰው የንፁሀን ደም ይፍረድ ፈጣሪ ነፍሳቸችሁን በአፀደ ገነት ያኑርልን	0
ነብስ ይማር የሰማእት ዋጋ በሰማይ ነዉ በረከታችሁ ይደርብን	0
ያማል በጣም ተዋዶ ተጋብቶ ተዋልዶ የኖረ ያ ፍቅር የሆነ ህዝብ ሲገዳደልአምላክ ምህረትህን አውርድልን	0
አንድየ ባክህን ምህረቱን ላክላቸው ሁሉ በእጅህ ሁሉ በደጅህ	0
ስማእታቱ አክሊላቸውን ተቀበሉ	0
የመጨረሻው ዘመን ምልክቶች እየታዩ ነው	0
​​እግዚኦ ሰላመከ ሀባ ለአገር ወፅድቀከኒ ለህዝበ ክርስቲያን አግርር ፀራ ታህተ እገሪሀ እቀብ ህዝባ ወሰራዊታ ለአገሪትነ ኢትዮጲያኢትዮጵያንና ህዝቦቿን ድንበር የሚጠብቁትን	0
ነብሳቸዉ በአፀደገነት ያኑረልኝ ግን ኡነትነዉ በነዚህ ሰወች ተገድለዋል	0
ነፍጥ ባሪያነት ያስቀራልነፃነት ያስጠብቃል	0
ትምክህትን ይወልዳልበነፍጥ ማንነቱን ያስጠበቀ ትምክህተኛ በኩራት ይኖራልበታሪኩ ይፎክራል	0
ፃነት የነፍጥ እንጂ የንፍጥ ንግግር ውጤት አይደለችምነፃነት የነፍጠኞች ውጤት ናትያለነፍጥ ነፃነት የለምኢትዮጵያ የነፍጠኞች ስሪት ናትክብሯልኡላዊነቷነፃነቷ የተጠበቀው በነፍጠኞች ነፍጥ መሰዋእትነት ነው	0
ነፃነቷን ገፈውማንነቷን ረግጠው ብሄረሰቦችን ባሪያ ለማድረግ ድንበር አልፈው ጦርነት የከፈቱብን ቱርክግብፅጣሊያንፑትላንድመሀዲስቶች ድባቅ የተመቱት በነፍጠኞች ነፍጥ ነው	0
ከዚህ ጋር መታወቅ ያለበት በኢትዮቱርክ ጦርነት ጊዜ ኦሮሞዎች ለብሄራዊ ጦርነት ተሳታፊ አልነበሩምአንድም ለኢትዮጵያ ገና አዲስ መጤ በመሆናቸው ተረጋግተው መኖር አልጀመሩም	0
ሁለትም የገናሌን ወንዝ ተሻግረው ጉራጌ ውስጥ የምትገኘውን ወጅ አጥፍተው ነባሩን ኗሪ እያፈናቀሉ ሀገር በወረራ እየያዙ ነበረ	0
ተጨማሪ ጠላት እንጂ በኢትዮቱርክ ጦርነት ተሳታፊ አልነበሩም	0
ጦርነቱን በሰራየበአዲቆሮበሀማሴንና በደባሯ የመሩት የነፍጠኞች አባት አፄ ሰርፀ ድንግል ናቸውነፍጠኞን ቱርክን በተደጋጋሚ በማሸነፍ ሀገሪቱን ከቅኝ ግዛት ታድገዋታል	0
ነፍጠኞች አዲቆሮ ላይ ሲዋደቁ ሰሜን እና ደቡብ ኢትዮጵያን የሚጠብቅ ጨዋ ወይንም ወታደር ባለመኖሩ ይኼን እንደ ጥሩ አጋጣሚ በመጠቀም ኦሮሞዎች በወረራ ከገናሌ እስከ መቀሌ ተስፋፉይኼ ሰነድ ላይ ያለ መራራ ሀቅ ነው	0
ይኼም ሆኖ ነፍጠኞች አጥንት ከስክሰው ደማቸውን አፍስሰው ዳር ድንበር በአስከበሩ የትናት መጤ ደርሶ ሲሳለቅ በአጎረስኩ እጄን ተነከስሁየሚሉት በደል ይሆናል ዛሬ ሽመልስ አብዲሳ ባህል ኖሮት ኢሬቻ ላይ ተገኝቶዛፍ በቅቤ እንዲቀባጮፌ ጎዝጉዞ ለወንዝ እንዲሰግድ ያበቀው ነፍጠኞች በነፍጣቸው የኢትዮጵያን ነፃነት በማስከበራቸው መሆኑን ልብ አላለውም	0
እንዴት ሰነበታችሁ ምእመናንእኔ ደህና መጥቻለሁ እግዚአብሄር ይመስገንሁላችሁም በየአላችሁበት የአለም ዳርቻ ሰላማችሁ ይብዛእስካሁን ከሰባት ጊዜ በላይ አካውንቴ ታግዷልአንድ ጊዜም ተጠልፎ ነበረነገርግን የነፍጠኛ ልጅ ተስፋ አይቆርጥም	0
በዚህ ቀን ውስጥ ብዙ ሁናቴዎች ተካሄዷልሀይማኖታዊ ሰልፍየደመራ በአል እና አጨቃጫቂው ኢሬቻ	0
የአማራን ህዝብ ሀብረተሰባዊ እረፍት መንሳትተረጋግቶ እንዳይሰራነግዶ እንዳያድር ይልቁንስ በፀጥታ ጉዳይ ብቻ እንዲጠመድ ብሎም ከማእከላዊ መንግስት ፖለቲካ እና ከአዲስ አበባ ከተማ የባለቤትነት ጥያቄ ማራቅ	0
የወልቃይትየመተከልየራያና የደራ ጥያቄዎች ተዳፍነው እንዲቀሩ ህወሀትኦነግ ተናበው እየሰሩበት ያለ እኩያ ነው	0
የአክቲቪዝሙን ሰሞነኛ የጎጠኝነት አሰላለፍ ወደ አማራነት አጀንዳ ማምጣትችግሮችን በውይይትና በእርቅ መዝጋትከአክቲቪዝሙ የራቁትን እንዲመለሱ ማድረግ እና ይኼ አሰላለፍ የሀገር ውስጥና የምስራቅ አፍሪካን ከአለም ነባራዊ ሁናቴ ጋር በማንፀር መተንተን መንደፍ ቅድመና ድህረ ትንተና ማስቀመጥየማሀበረሰቡ ፖለቲካዊ ማሀበራዊና ኢኮኖሚያዊ ግንዛቤው እንዲያድግ ማንቃትበአማራ ላይ የሚነዛውን የሀሰት ፖሮፖጋንዳ ማምከን ይሆናል	0
ታሰሩ የህሊና እስረኞች እንዲፈቱ ማድረግበተለይም ብጄ ተፈራ ማሞኮል አለበል አማረ ጠንቅቀው የሚያውቁ በመሆናቸው ወደ ቦታቸው መመለስበተመሳሳይ እነ ስንታየሁ ተፈተው	0
ፋኖን በሚገባ እንዲያደራጁ ስራውን ለእነሱ መስጠት	0
የአማራ ክልል የደህንነት ተቋም ማዘመንበተለይም ከሱዳን ወደ መተማ መግቢያ ኬላ ላይ ልክ እንደ አዋሽሚሊና ጋላፊ ሁሉ መፈተሻ ማሽን መትከል ዋነኞቹ ናቸውከዚህ ውጪ አማራ በተፈጥሯዊ ስሪቶ አሸናፊ ነውአማራ ነፍጡን ያነሳ ጊዜ ጣሊያን እንኳን እንደ ጉም ተና እንደ ጢስ በና ድራሿ ጠፍቷልበጦርነት ልምድ ላለው አማራ የጦርነት ወሬፉከራና ጉራ ከመጤፍ ነው	0
ነፍጠኛው እንኳን መጣህ ያውም በወሳኝ ጊዜ በል ወጣቱ ንስር እንደተለመደው የተረኞችን ቀደዳ መልክ አስይዘው	0
ፃነት የነፍጥ እንጂ የንፍጥ ንግግር ውጤት አይደለችም	0
ታዴ ወንድሜ ወንድማለም የሜዲያ ጥቅሙ እሚገባኝ አንተን ሲያገናኘኝ ነዉ የ ወደፊት እይታ እና ተስፋየ ፍንትዉ ይላል	0
መልክቱ ግልፅና ወቅታዊ ነው እናመሰግናለን በርታ ወንድማችን	0
አንጀት አርስ ወንድማችን እንኳን በሰላም መጣህ ዘግይቶም ቢሆን እንኳን አደረሰህየአማራ ህብረት ለኢትዮጵያ አንድነት	0
አንተ ባለምጡቅ አእምሮ ብላቴና እግዚአብሄር አምላክ ከክፉ ይጠብቅህ	0
ወንድማችን እንኳን በሰላም መጣህ ወንድማችን እግዚአብሄር በፈቀደው ስአት ሁሉም ነገር ይሆናል በትግስት ከጠበቅነ እንኳንደስአለህ	0
መምህሬ መሪየ እንኳን ደህና መጣህ ይህን ሀሳብ ቀጥታ ወደ ተግባር መግባት አለበት አደፓ	0
እንኳን በሰላም ወደ ፔጅህ መጣህልን ወንድማለም	0
ታዴ ብርቅየ ወንድማችን እንዃን ደህና መጣህልን	0
ታዴ እንኳን ደህና መጣህ ድምፅህ ቢጠፋኝ ከዳሞትራ እስከ ማኑሄ ትናንት እያየሁ ነበር	0
ታዴ ውንድሜ ተናፍቀሀን እንኳን ድህና መጣህልን	0
እንኳንም መጣህልኝ ጋትልኝማ ሄንን መራራ ሀቅ	0
እንኳን ደህና መጣህ ሀቀኛ እና ደፋር ብልህ በመሆንህ አንተ ላይ ከዚህም የባሰ ነገር ሊያደርጉ ይችላሉ ነገር ግን ከቶዉንም አይችሉም ምክንያቱም አንተ እዉነት ነህ	0
የድንግል ልጅ አንኳን በሰላም መለሰህ እራስህን ጠብቅልን ደሜ ወንድሜ ዘሬ አማራ ኢትዮጵያዊ እንቁ ነህ	0
ተናፋቂ ወንድሜ	0
አቦ እጅህ ይባረክ ብላቴናው የአማራ ልጅ በርታ እግዚአብሄር ይጠብቅህ	0
ሳተናው ወጣት የአንበሳው ደቦል የእሳቱ ጉማጅ	0
አንደበቱ ማር ቃላቱ ቅመም ሩቅ ተራማጅ	0
አትናገሩት ከነፍጠኞች ነው አያስቀርብም እንደሳት ሲፍጅ	0
ታዴ አንተ ብቅ ሰትል ጥበብም አብሮ በቅ ያለ ነዉ የሚመስለኝ እድሜ አጤንነት ጋር ፈጣሪ ይጠብቅህ	0
ታዴ እንኳን በሰላም ተመለሽልኝ የእኔ ውሀ ጥም ቆራጭ መመኪያዬ	0
እንኳን ደህና መጣህ	0
ነፍጥ ትምክህትን ይወልዳል ነፃነትንም ያውጃል	0
ዋው ታዴ እንኳን ተመለስክ ምርጥ ሰው	0
ወንድሜ ሰልፉ ብርቱ ነው በጣም	0
እንኳ መጣህ እስኪ	0
የሚፈለገው እንዷንተ አርቆ የሚያስብና ችግሩን ከነመፍትሄው በማስቀመጥ ሁሉም ሰው በሚረዳው መልኩ የተነተንክበት መንገድ ተመችቶኛል ግን የአማራ ጠላት ከውጭ ብቻ አይደሉም የህዝብ መፈናቀል የወጣቶች ሞት ግድ ያላላቸው ሆድ አደር አማራ ተብየዎችን የሚያስተምር መንገድ መፈለግ አለበት	0
ታዴ መብረቁ ወንድማችን እንኳን በደህና መጣህልን	0
እንኳን ደና መጣህ ምርጡ ወንድማችን ተናፍቀሀል	0
እንኳን ደህና መጣ ታዴእውነት ነው አማራ ተስፋ አይቆርጥም የነበሩብንን ክፍተቶች ዘግተን ትግላችንን ወደፊት መቀጠል አለብንበርታ አይዞን	0
ነፍጠኛው ወድሜ እንኳንም በሰላም ብቅ አልክልን	0
እንኳን ደህና መጣህ ታድየብአዴን የሚባል የታላቁ አማራ ህዝብ ጋንግሪ እና የቋንጃ አከክ ውድ ልጆቹን ማሰበላት ተያይዞታል ቢመርህም ዋጠው አማራ በተፈጥሯዊ ሰሪት አሸናፊ ነው	0
እንኳን ተመለስክልን ታዴ ማኛ አማራነት ለዘላለም ይለምልም	0
ውይይ ታድዬ እንኮን በደህና መጣህ	0
እንኳን ደህና መጣህ አልጠፋህም	0
ከስህተትህ ተማር ነፍጠኛ ታደለ ጥበቡ ስህተቱ ምንድነዉ ካልከኝ ከዚህ በኋሏ የኤፍቢ ገፅህ ለአንድም ቀንና ሰከንዶች እንዳይዘጋ	0
ታዴ እንኳን ደህና መጣ ወንድሜ	0
አንተም ያው ነህ እንደሱ ነገደኛ ነህ ውጣ ከዚ ለኛው ክዘ የነገድ ወሬ አይመጥንም	0
ውይ የት ጠፍተክ ነው ወንድም	0
እውነት ነው ንስሩ እንኳን ደህና መጣህልን	0
እንኳን ደህና መጣህ ወንድማችን	0
እግዚአብሄር እድሜና ጤናውን ይስጥህ ውንድማችን	0
ቢቻል መድረክ ተመቻችቶ ብንከራከር ደስ ይለኝ ነበረግን የታሪክ አጭበርባሪዎች ስለሆኑ ደፍረው አይቀርቡም	0
ሆራ ፊኒፊኔ በአዲስከበባ ከተከለከለና ከቆመ አመት ሆነው ይላሉ ነገርግን አዲስአበባ እንደገና ከተቆረቆረች አመቷ ነው ሲባሉ ማስረጃ የላቸውም	0
ሌላውን ሰፋሪ ይላሉ ነገርግን ኦሮሞዎች አሁን የሰፈሩበትን መሬት ነባሩን ህዝብ እየደመሰሱ በወረራ እንደያዙ ተአማኒነት ያላቸው ጥንታዊ ሰነዶችንየምርምር ውጤቶችን በማስረጃነት ስናቀርብ በአንፃሩ እነሱ አንድም ማስረጃ አለን አይሉምእንዲያውም የራሳቸው የኦሮሞ ምሁራን ኦሮሞ በወረራ እንደተስፋፋ የፃፉትን ማስረጃ አይቀበሉትም	0
አፄ ሚኒሊክ ተሳስቷል የባሪያ ንግድን ባያስቆም ኑሮ ይህ ሁሉ ጥጋብና የውሸት ታሪክ አንሰማም ነበር	0
ወይ መታመም ሰው እንዴት ጥላቻ ለማስቀጠል እንደዚህ ይደክማል አሁን ይሄ ምን ይጠቅማል ለሰፊውና ደሀው ገና ከከብት ጭራ ላልተላቀቀው የኦሮሞ ማህበረሰብ ምን ይሰራለት ይሆን ለዚህ ሲያዛጋስ ለሚውለው ወጣት ምን ፋይዳ አለው ቂምን ይዞ መቀጠሉ ምን ጠቀመ	0
ይህንን የምለው ተከሰተ የተባለው ሁነት እውነተኝነቱን የሚያረጋግጥ አንድም እውነት የሆነ ማስረጃ ነገር እንኳን ሳይገኝ የግድ ተቀበሉ	0
ናሁ ቴቪ ነፃ ውይይት ፕም ላይ አቶ ግርማ ጉተማ ድሮ በታሪክ ትት በጣም ጎበዝ ነበርኩ እንደውም ለብቻው ማጥናት እፈልጋለሁ ሲል ሌላኛው እንግዳ አቶ ኤፍሬም ገደቦ ኮስተር ብለው ምን ቢሉት ጥሩ ነው አጥና አጥና እውነቱን ታቃለህብለውት እርፍ	0
በርግጥ ከውጭ ሀገር መንግስታት ረብጣ ዶላር እዬተከፈላቼው ህዝቦችን የማፋጄት ስራ የሚሰሩ እንዳሉ በጣም ግልፅ ነውለማንኛውም የኦሮሞ ህዝብ የቆዬ ጨዋና የመቻቻል ባህልህንእንድሁም ሰላምህን እነዚህ ቅጥረኞች ከእጅህ እንዳቀሙህ ከሌላው ብሄር ጋ በመተባበር መታገል ይኖርብሀል	0
ፖስቱን የለጠፈው ስው አንድ ትልቅ እውነታ የረሳ ወይንም ግንዛቤ የሌለው መስሎ ታየኝ	0
እነዚህ ሰዋች ፖለቲሺያን እንጅ እውቀት ለማሻገር ትውልድን ለማነፅ የተነሱ ምሁራን አካዳሚሽያን ወይም እስኮላር አይደሉም	0
ከማደንቅላቸው አንዱ እነሱም እንደዚያ ነን ብለው አያውቁም	0
መቸ ይሆን ከህወሀትና ከኦነግ ኦዴፓ የሽብር ቡድን ቅድስት ሀገሬና ቅድስት ቤተ ክርስቲያኔ ኦርቶዶክስ ተዋህዶ ነፃ የሚወጡት	0
አምላኬ ሆይ እባክህ ሀይልህን አንሳ ደጉ ህዝብህንም አድን	0
ዛሬ ቤተመንግስት የንጉሱ የአፄ ምኒሊክ ቤተመንግስት ስለሚጎበኝ ሀሳብ ማስቀየሪያ ነው	0
እዉነት ነው ታዴጉዳዩ የስሜት ብቻ ነው	0
	0
ጋላየውገኑንብልእትቆርጦእናየብልእትቋንጣይዞየሜዞእርእሳርያልበላከብትእራሱጋላነውዝእንኛአውየአለምጥቁርያስከብረየኢትዩጵያዊመሪአፀሜኒልክፈራህእግዛብሂርአምላኩንነውመእንጋጋላእደሜለውአደለምጋላምንእእሰሳከእናቱጋርየሜተኛከብትእግዛብሂርእንየማያውቅጭራሽአማራየዛጀግናዘርከእንዚህጋርአትመልሱያሀያእቁላበሆዱነውዘምበ	0
ማህይምናን አይባልም ማይምናን ነው የሚባለው ወጣትታደለ ጥበቡ	0
ታዴ እንኳን ደህና መጣ	0
ተባረክ አቦ አፌ ቁርጥ ይበል ጀግናችን	0
እንኳን ደህና መጣህ ሊቃችን	0
እንደ አማራስ አለ በጠራራ ፀሀይ የሌሎች ታሪክ ሰርቆ የራሱን የምያስመስል	0
ሆንክ ቶርቶራ ደብተራ ዲሪቶአም ምላስ ቢቻ አንተን ብሎ ልህቅ የሆምክ አለቅላቂ	0
አንበሳ ነህ አንተን አለማድንቅ አይቻልም	0
ቻለው ምንም ማረግ አይቻልም	0
እንደዚህ የተፈራው ለምንድነው	0
ታድያ መከላከያ ከተማዋን የማፅዳት ዘመቻ የጀመረ እለች ይታየኛል	0
አሰምተው ነው የሚገቡት ለምን ነገሮችን በትእግስት አታዩትም	0
ቤት ለቤት አይደለም ተራራ ለተራራ ወይም ስርቻ ለስርቻ እንደ አይጥ እየተሹለከለክ ብትዝት ብታስፈራራ እሁድ ከመስቀል አደባባይ አይቀርምምክንያቱም ነፃነትን ለአንተ ብቻ ማን ሰጠ ምክንያቱም ይህ የአዲስ አበቤዎች ጉዳይ ነውና እናም ገለል በል	0
በምን አይነት ቀሽም ስሌት እንደሚሄዱ ተመልከቱ ገና ለገና የእስክንድር ደጋፊ አብዛኛው አማራ ነው በሚል ስሌት ለእሁዱ ሰልፍ እንዳይደርስ ማድረጋቸው ነው ሆኖም በተቃራኒው ለእስክንድር ለአአበባ ህዝብ ማስታወቂያ እየሰሩለት መሆኑን ማን በነገራቸው	0
የኦሮሚያ ክልል መንግስት ህግ ያስከብር	0
አየህ ታደለ እንኳን ደስ አለህ ብለህ የፆፍክለት ለእንዲህ ያለ መሪ ተሸለመ ብለህ ነበር እናስተውል ለአማራ ለልሆነ ሁሉ ማጨብጨባችን አሁንም ማቆም አልቻልንም በፈጠራቹሁ እናስተውል የአገሬቱን ህግ እናደንብ የማያስጠብቅ መንግስት ተሸለመ አልተሸለመ እኛ ምን አገባን ማጨብጨቡን ጋብ እናድርግ በየቀኑ አማራን ለማጥፈት ሌት ከቀን ለሚሰራ ሰው እንኳን ደስ አለህ ማለት አሳፈሪ ነው አሁን ደግሞ ሌላ ዜና ማውራት የቆምንለትን አላማ መዘንጋት ነው	0
እኔ ግን የምታናድዱኝ መንግስት የሆነ ነገር ያድርግ የምትሉት ነገር መንግስት እኮ ኢትዮጵያን ከረሳት ቆየ	0
መንገድ የተዘጋው ለአአ ሰላም ሲባል ነው እስክንድርን የሚደግፉት የናንተ ክልል ሰው ብቻ ነው እመነኝ የሸገር ህዝብ አይደግፈውም	0
ለዚ ነዋ የኖቤሉ ሽልማት ጁሀር ቢወስደው ደስ ይል ነበር መለስ በሰራው ላብይ	0
ሰው እኮ ሰው የምንለው እደሰው ሲአስብ ነው ይህን አይነት አስተሳስብ ይዘው የት ሊደርሱ እደሆነ ባላውቅም ይህ አይነቱ ጥጋብ ወደ ሀገር ትርምስ ዳዴ እያልን መሆኑን እሰቡት ቄሮ	0
እኔ እምለው ይህን ሽልማት ግን ጃዋርሜንጫው ይቀበለዋል ወይ	0
ምንም ነገር ሳይገባህ ታጨበጭባለህ	0
ለመሆኑ ለምን የሸለሙት ይመስልሀል	0
ድሮውንም አይቶ አያውቅ የጨው ወጥ	0
ታዴ ትክክል ነዉ እኔም ከችግሩ ተቛዳሽ ነኝ እሄው ደጀንላይ ቁመናል	0
አለም እንደዚህ ሁናለች ወዳጀ	0
መበረታታት ያለበት ነገር ነው	0
አይ ታደለ ህግ አለ እንዴ	0
ውይ ውድ ኢትዮ ባቃ ጣፈሽ	0
የመንበረ ፓትርያርክ ጠቅላይ ፅህፈት ቤት ለአዲስ አበባ ከተማ አስተዳደሩ ከንቲባ ፅህፈት ቤት በላከው ደብዳቤ	0
የታከለ ኡማ መንግስት በመስቀል አደባባይና ጃንሜዳ እያከናወነ ያለ ፈቃደኝቴን ሳይጠይቅ ሳያማክረኝ በወሰዳቸው እርምጃዎች የባለቤትነት መብቴን ተጋፍቷል ለዚህም ማብራሪያ እንዲሰጠኝ ስትል ቤተ ክርስቲያን ጠየቃለች	0
ከንቲባ ታከለ ኡማ አደባባዩ የመኪና ማቆሚያን መፀዳጃ ቤት ካፌና ሬስቱራንት እንደሚሆን ነው እየተነገረ ያለው	0
ቁፋረውንም የቻይናው ሲሲሲሲ ኩባንያ ጀምሮታል ተብሏል	0
የበአለ መስቀል ማክበሪያ ስለሆነው የመስቀል አደባባይና የበአለ ጥምቀት ማክበሪያ ስለሆነው የጃንሜዳ ቦታዎች ወቅታዊ ሁኔታ ይመለከታል	0
የኢትዮጵያ ኦርቶዶክስ ተዋህዶ ቤቴ ክርስቲያን የአዲስ አበባ ከተማ ከተቆረቆረበት ጊዜ ጀምሮ ለረጅም ዘመናት በአለ ጥምቀትን በጃንሜዳ እና መስቀልን በመስቀል አደባባይ በሀገር አቀፍ ደረጃ ስታከብር የቆየች ከመሆኑም በላይ ሁለቱም አበይት በአላት በዩኔስኮ ተመዝግበው በቱሪዝም ዘርፍ ሀገሪቱ ከፍተኛ ገቢ እንድታገኝ ቤተ ክርስቲያኒቱ ካላት ፅኑ ፍላጎት የተነሳ ባደረገችው ከፍተኛ ጥረት ሁለቱም አበይት በአላት በአለ አቀፍ የቅርስና የስነ ጥበብ መዝገብ በመመዝገባቸው በተሪዝሙ ዘርፍ ከከተማ አስተዳደሩ አልፎ ሀገር አቀፍ ገቢው በከፍተኛ ደረጃ በማደጉ መንግስታችንም ሆነ ህዝባችን ተጠቃሚ መሆኑ ይታወቃል	0
ይሁን እንጂ እነዚህ ከመንፈሳዊና ባህላዊ እሴታቸው በተጨማሪ ለሀገሪቱ ትልቅ የገቢ ምንጭ በመሆን የታወቁትን በአላት ማክበሪያ ቦታዎች የበለጠ በመንከባከብና እሴታቸውን በመጠበቅ የቱሪስት ፍስቱ እንዲጨምርና የሀገሪቱም ገቢ አድጎ የህዝባችን ተጠቃሚነት በበለጠ ሁኔታ እንዲረጋገጥ ለቦታዎቹ ልዩ ጥበቃና እንክብካቤ በማድረግ ፈንታ ይባስ ብሎ የበአለ ጥምቀቱን ቦታ ለገበያ ማእከልነት እንዲሁም የበአለ መስቀል ማክበሪያውን ቦታ ደግሞ ምንነቱ ላልታወቀ ፕሮጀክት እንዲውል ሲደረግ የበአሉም ሆነ የቦታው ጥንታዊ ባለቤት የሆነችው ቤተ ክርሰቲያኒቱ ሳትጠየቅና በጉዳዩ ላይ ሳታምንበት ግልፀኝነት በጎደለው ሁኔታ ወደ ትግበራ መገባቱ ቤተ ክርስቲያኒ…	0
የከንቲባ ፅቤቱ የጉዳዮን አሳሳቢነት ከግምት ውስጥ በማስገባትና ልዩ ትኩረት በመስጠት በጉዳዩ ላይ ተገቢውን አፋጣኝ ምላሽ እንዲሰጠን በቅድስት ቤተ ክርስቲያናችን ስም እንጠይቃለን	0
ይህ በጣም ድፍረት ነው ቤተክርስቲያኒቱ	0
ለብዙ አመታት በይዞታነት እየተገለገለችበት የለዉን ይዞታዋን በማን አለብኝነት ያላግባብ ከእሳ ፍቃድ ውጭ የሚደረገዉ ህገወጥ ስራ ቆም ብሎ አስቦ መራመዱ የተሻለ ይሆናል ስለዚህ እንደ ዚህ አይነት አሰራር የሚመለከተዉ የመንግስት አካላት ሀይ ሊባል ይገባል ለዚች ቤተክርስቲያን የሀገር ባለውለታ ለእሳ ይህ አልነበረም	0
አስቀድመው የኦርቶዶክስ ተዋህዶ እምነት ተከታዮች የሆኑተትን ልጆችዋን ከየመስሪያ ቤቱ አውጥተው ያለ ስራ ሲያስቀሯቸው ሲያሳድዷቸው ቤተ ክርስቲያኗ ልጆቼ በእምነታቸው ከስራ እየተፈናቀሉ ነው በማለት አቤቱታ በማሰማት ፈንታ ዝምታ በመምረጧ ዛሬ በይዞታዋ በቅርሶቻው በ ጥምቀት ቦታዎቿ መዝመት ጀመሩ	0
አገራችን ያጣችው መፀዳጃ ቤት እና አይደለም የገቢ ምንጭ እንጅ ለዚህም ገቢ ማስገቢ ከምላቸው ቱ ይሄው መንግስታችን እያፈረሰብን ነው በሀገራችን ውስጥ ሁለቱን በአላት ለማክበር የሚመጡ የውጭ ሀገር ጕብኝዋች መኖራቸው እየታወቀ ይህንን ነገር ግን መንግስት ሳያስበው ቀርቶ ነው ብየ ማሰብ አልፈልግም ስለዚህ የሚመለከተው የመንግስት አካል ቢመለከተው ደስ ይለኛል	0
በሚቀጥለው አመት መንግስት ሁለቱንም በአላት እንዳይከበር ይፈልጋል ስለዚህም በመጀመሪያ ህዝብን በወረርሽኝ ሰበብ ቤተ ክርስቲያን ተዘጋ ቀጥሎ ምእመኑ ከቤት እንዳይወጣ ተደረገ ከዛም ቦታዎቿን መውረስ ገና ይቀጥላል ህዝብ እንደሆነ በእጃችሁን ታጠብ ከቤት አትውጡ በሚል አጀንዳ ደንዝዟል እውነትም ኢትዮጵያ እና ቤተ ክርስቲያን ተንሳያቸው ደርሷል እስከዛ ግ	0
ኧረ ይህ ነገር በዛ በጊዜ መላ ካልተፈለገለት በጣም አደገኝነታቸው በፍጥነት እየተጓዘ ነው እውነትም ይህ ጥላ ቢስ የሆነ ስውየ የመጣብን ኢትዮፅያ ኦርቶዶክስ ተዋህዶ እምነት ፀር_ለመሆን የመጣ የሳይጣን ተልእኮ ፈፃሚ ነው ምን ባልታስበና ባልተጠበቀ መንገድ ወደ ስልጣን ብቅ ብሎ ለስንት አመት ከህዋት ጋር በአብሮነት በመስራት የህዝቡን ትርታ በደንብ ከተረዳ ና ካጤነ በሀላ የህዝቡ ችግር ናቸ	0
ሲጀመር ይኼ መንግስት የመጣው ኦርቶዶክስ ተዋህዶን ለማጥፋት የመጣ ነው ስንት ነገር ነው ያጠፋው ውስጥ ለውስጥ ለመንፈሱ የተመቸና ተልእኮ ያለው ነው ለሁሉም ነገር እኮ እንዳልነበረች አድርጎ ጥፋቱን ሁሉ አፋጠነው ነገሩ ምን ያርግ ወደሽ ከተደፋሽ ቢረግጡሽ አይክፋሽ አይደል የሚባለው ምክንያቱም ቤተክርስቲያናችንን እና ተዋህዶን ያስደፈሯት የራስዋ ልጆች አባቶች ናቸው ቤተክርስቲያን ከመንግስት የበላይ ናት ልትከበር ይገባት ነበር ግን ምን ዋጋ አለው አንድ ሸለምጥማጥ መናፍቅ አፉን እያለሳለሰ እንቆቅልሹን አበዛው ምን ይባላል እግዚአብሄር አምላክ ስራውን ይስራ አለም በዚህ ሰአት ጭንቅ ውስጥ ነው እሱ ምን ልበለው	0
የሚሰራው ስራ ለአገር ጠቃሚ ከሆነ በቅንንነት ከሚመለከታቸው አካላት ጋር ተመካክሮ ቢሰራ ምናለበት ቦታው ላይ የሚሰራው ስራ ስረአተ መስቀል በአል ይሁን ሌላ አከባበርን ማደናቀፍ ያለበት አይመስለኝም የሚያደናቅፍ ስራም ይሰራል ብዬ አልገምትም ምን ያህል ገቢ እንደሚያስገባ ከእኔ ይልቅ የከተማው አስተዳደር ያቀዋል ብቻ ህዝቡን ብንረዳው የምንሰራው ስራ በእቅድ የተያዘ ከሆነ አብራርተን ወደ ትግበራ ቢገባስ ለህዝቡ እስከቆምን ድረስ የህዝቡን በህልና እምነት አክብረን የሚበጀውንና የሚሻለውን አተገባበር እንፈፅም	0
አመራሩ ቀና ምላሽ እንደሚሰጥ እምነቴ ነው	0
ሰው ሴሬሞኒ ያዘጋጀበትን ቦታ ሁሉ ይዝታዬ ካለ ለዝናብ የተጠለልንበትን በረንዳ ይገባኛል ሀይ በሉልኝማ ልንል ነው ፕሮጄክቱን እንደግፋለን እስካሁን ያልሰራ አእምሮ በትዝታ ተዘግቶ የሚኖር ሁሉም በትዝታ ቆዝሞ እንዲኖር ስራ እንዳይሰራ እንቅፋት የመሆን ብቃት ፍተሻ ላይ ነው	0
ለመላው የኦርቶዶክስ እምነት ተከታዪች በሙሉ እኛ ሀይላችንም ጉልበታችንም ፈጣራ እና ፀሎት ነው በዚ መሳርያ ድል እንነሳቸዎለን አባቶቻችን እኮ ቆዩ ፓለቲከኛ ከሆኑ ለዛም ነው እነዚህ መናፍቃን ምላሳቸውን አስለው የእሳት ወርቅ እይተፎ ተዎህዶን ለመበታተን ከኢሉምናንት ጋር ተዎደው እኛን ሊበትኑ የመጡት ስለዚህ ሳያባሉን ሳያጫርሱን ፈጣራ ነቅሎ ከመንበሮ እንዲያወርድልን በፀሎት እንበርታ እኛ ጋር ያለው ከነርሱ ይበልጣል እና	0
እኔ ግራ የገባኝ ምናለ እንዲ ብር ከተረፊቸው ብዙ በውሀ በመብራት በመንገድ እጥረት የሚሰቃዩ ከተሞች አሉ እነሱን በመደገፍ የዋና መዲናዋን የወጣቱን ፍልሰት መቀነስ ይቻላል ቤተመንግስት ውስጥ ያተሰራው ሙዜም ምን ያህል አተረፍንበት ካድሬዋች በናታችሁ እንደወያኔ ግዜ ጭፍን ደጋፊ አትሁኑ አነስተኛ ከተሞችን አጠናክሮ ዋና ከተማዋላይ ያለውን ጫና መቀነስ ይሻላል ወይስ አበባ ፒኮክ ሙዜም እያሉ ከፍተኛ ወጪ ማውጣት	0
ብዝበዛውና ምርኮው ፈጠነ	0
እንዳናስተውል አዚም ያደረገብን ማን ነው	0
፩የተጠመቀ ይድናል ያልተጠመቀ ግን ይደየናል	0
፪መስቀል ሀይላችን ነው መድሀኒታችንም ነው አይሁድ ይክዱታል እኛ ግን እናምነዋለን	0
፫የፈለገ እድገትና ገቢ ጥንቅር ይበል ጥምቀትን የአለም ህዝብን እኩልነትን ያስተምራል የማንንም ሀይማኖትን ሳይለይ ፩ምስጥረ ጥምቀት ሀብታምና ድሀ እኩል በማግኙት የወንዝ ውሀ ወይም ባህር ይጠመቃሉ ክፍያ የለውም በወተት አልያም በማር አልተጠመቁም	0
የነቃ የለም እንጅ መጥፎ ስራቸውን እንደ ግንደ ቆርቁር ውስጥ ለውስጥ እየሰሩ ነው ግን ቢነቃም ለምን የሚል ሰው ጠፋ እንደኔ ምለው ፈጣሪ ስራቸውን መሰረት ያደረገ ምላሽ ይጣቸው አዛኝቱ ኢትዮጵያን አደራ አደራ አደራ	0
እኔ የሁለቱንም ዜና ስሰማ ከቤተክርስትያኗ ጋር ስምምነት ተደርጎ ነው የሚል ግምት ነበረኝ	0
በዛሬው እለት ግን መንበረ ፖትሪያርክ ጠቅላይ ፅቤት የፃፈውን ደብዳቤ ስመለከት በእውነት ከልብ አዝኛለሁ ችግሩንም ሆነ ልማቱን ከፊት ሆና እየተሳተፈች ከምትገኝ ቤተክርስትያን ጋር ውይይት ተደርጎ ቢሆን ኖሮ ያውም ለጋራ አገር ያምር ይሆናል እንጂ አይከፋም	0
በነዚህ ቦታዎች ብዙ ነገሮች ይከናወናሉ ነገር ግን ሀይማኖት ሲሆን ነገሮች ሆሎ ስስ ይሆናሉ መንግስት በስልጣን ለመቆየት ከህውሀት ብዙ መማር አለበት ልማት መኖሩ ጥሩ ነው ነገር ግን የህዝቡን ፍላጎት ማስቀደም ለምሳሌ የአባይ ግድብን ብንጨርስ ምን አየነት ችግር እንደሚፈታ ላስተዋለ መገመቱ ቀላል ነው አሁን ግን ገንዘብ እየፈሰሰ ያለው ቅድሚያ ለማይሰጠው ጎዳይ ነው ይህን ሰል አያስፈልግም ለማለት አይደለም ስለዚህ መንግስት ሆይ ቅድሚያ ለሚሰጠው ቅድሚያ በመሰጠት እድሚን ማራዘም ብልህነት ነው	0
የእውነት ሸገሮች ግን እያናደዳችሁን ነው አባቶች ጭራሽ መግለጫ እስኪያወጡ ወይኔ የባህርዳርን ወጣት ባያችሁት በ መስቀል አደባባዩን ገና ለማረስ ሲሞከር ወንድሞቻችንን በሞት በሰማእትነት ገብረን ያልሞትነውም በዱላ ተደብድበን ያሰቡትን ሀሳብ አስትተን እንዲያውም አሳምረው ሰሩልን ይህ ነው ክርስትና ወይ እንምጣ እንዴ	0
በተለይ ዳኛቸው ወርቅአለማሁ የተሳካልህመናፍቅ ነህ በርታ የጥፋት መንገድን በሚገባ	0
የማንም ዱዝ መሪ ነኝ ባይ የኢትዮጲያ ኦርቶዶክስ ተዋህዶን ንብረትም ሆነ እምነት እንዲነካ አንፈቅድም አሁኑኑ የጃልሜዳና የመስቀል አደባባይን ለባለ ንብረቷ ቅድስት ቤተ ክርስቲያን ያስረክብ ካልሆነ ግን ለእምነታችን ስንል እየገደልን እንሞታለን	0
እባቡ ዘሮች በገነት ብቻ ሳይሆን መልካም እና ለስላሳ በሆነ መርዛዊ አንደበታቸው የዛሬን አባቶች አስቷቸው አርፏል የቀድሞዋ ገነት በሄዋን ሰህተት ተዘጋች የዛሬዋ ገነት ቤተክርስቲያን እንመራታለን በሚሉ አባቶች ተዘጋች	0
ይህን ቀጣይ ሀገር አቀፍ ምርጫ የቤተየክርስቲያን እርስቶን የአዲስ አበባ አስተዳደር ካልመለስ ብልፅግናን በመላው ኢትዮጵያ ባለመምረጥ ኦርቶዶክስ እምነት ተከታይ የምናበርክክበት ጌዜ ይሆናል	0
ሀ ይ ል የ እ ግ ዛ ቤ ሄ ር ነ ው	0
እግዚአብሄር ሆይ እነዚህን የእፉኝት ልጆች ቤትህን ሲንቁ እና ሲያጠፉ ዝም ብለህ አትመልከት ጥጋባቸውን የሚያበርድ አንድ መአት ስጣቸው አምላክ ሆይ ስምህን በየደቂቃው የምትጠራውን ኢትዮጵያን አስባት	0
ስለ መስቀል አደባባይም ሆነ ስለ ጃን ሜዳ ባለቤቷ ቅድስት ቤተክርስቲያን ሳትጠየቅ ወደ ትግበራ በመገባቱ ታላቅ ስህተት ተፈፅሟል ለቤተ ክርስቲያን ጥላቻ ያላቸው አካላት በተለያዩ የሀገሪቱ ክፍሎች በተደጋጋሚ እነዚህን የደመራና የጥምቀተ ባህር ቦታዎችን መንጠቅ ከይዞታዎቹ ላይ መሸራረፍ እንዲሁም ታሪካዊነታቸውን የማሳጣት ፍርደ ገምድልነት አዲስ አይደለም	0
አረ መናናቁ ሰማይ ደርሷል	0
የደረሰውም ከድፍረት የመነጨ እንጂ ሌላ አይደለም	0
ለ እሬቻው ሲያደርገው ዝም ተባለ ለኮንሰርት ሲባል ዝም ለታላቁ ሩጫ ሲባል ዝም ለሰልፍ ችግር የለውም ሲባል ትንሽ ቆይቶ የቤት ክርስትያን አይደለም የህዝብ ነው ማለታቸው አይቀርም	0
አሁን ቅድስት ቤተ ክርስቲያን ጊዜውን የዋጄ ውሳኔ መወሰን ጥያቄዎቿን ለመንግስት ጠንከር ካሉ አቋሞቿን ከሚያሳዩ ጥያቄዎች ጋር መጠየቅና ልጆቿን ማሳዎቅ እና ሌሎችም በመሰረቱ ለኢትዮጵያ የቱሪዝም ገቢ ዋነኛ ምንጭ የኢትዮጵያ ኦርቶዶክስ ተዋህዶ ቤተክርስትያን ናት መስቀል አደባባይን ሲሆን መንግስት ሳይጠየቅ መጠበቅ ነበረበት	0
ግን ማን ነው የሚመራን እንዴት ነው ሀገራችንና ህዝቦቿን መንግስት የሚያያት ከዚህ ሁሉ በኋላ ይህ ለውጥ የሚሉት ነገር ስንኳ ህገ መንግስቱን ለመቀየር ዝግጁ አይደለም እናም ከምን ምን አይጠብቁም አይደል የሚባለው	0
ለምን የኢትዮጵያ ኦርቶዶክስ ተዋህዶ ታላላቅ አባቶች እና ምእመናን ሁሉ የሳምንት ፀሎት	0
አይደረግም እና ሀያሉ እግዚአብሄር ታከለን አብይንእንደነ መለስ ናጳውሎስ ከዚህ አለም	0
ያጠፋልናል ልክ ዋልድባን እንዳደረጉት ነው እየሆነ ያለው	0
አሁን ከመንግስ ሀይለማሪያም የበለጠ	0
ጠላት ኦርቶዶክስ ገጥሟታል በግልፅ	0
ሶርቶዶክስያውያን በአንድ ላይ በመቆም	0
በጣም የሚገርመው ሌሎች እምነቶች በዋናነት ዋቄፈታየኢትዮጵያ ወንጌላውያን አማኞችና ሌሎችም በቂና አስፈላጊ የቀብር ቦታ ሳይኖራቸው እናንተ በየቦታው ኩዳድ መሬት ይዛችሁ አሁንም የአዞ እንባ ታለቅሳላችሁ	0
ቅንብር ነው ባክህ የቆሻሾች ፖስት ነው መስቀል አደባባይም ሆነ ጃልሜዳን አልጠየቀችም የኢኦተቤክ ያልነቃውን ደግሞ ለማነሳሳትና አቧራ ለማስነሳት ነው	0
ስራ የሌለው ጭንቅላት የዲያብሎስ ሱቅ ነው ይላሉ ምእራብ አፍሪካውያን ወያኔ መስቀል አደባባይ ትላልቅ ወፎችን ማስቀመጥ መዘጋጋት ወያኔን ያልጠየቀ ተቋም አሁን አፍ መክፈት ምንጩ ከየት መሆኑ የታወቀ ነው	0
ጃን ሜዳ የእስፖርት ሲሰራ የፈረስ ውድድር ከአፄው ጀምሮ ሲካሄድ ማንን ነበር ፍቃድ የሚጠይቁት ወያኔ እንዴት እንደመጣች ደግሞ በቀላሉ መገንዘብ ቀላል ነውና ወያኔ ነፍስ ይማር	0
በኦርቶዶክስ እምነታችን ከመጣማ ለማንም ወደኋላ አንልም	0
ገና ሳይመረጡ እንዲህ ያደረጉ የተመረጠ እለት ያኔ ነዉ መፍራት	0
ማነው ቤትክርስቲያንን ባለቤት ያረጋት ያ ዘመን ላይመለስ ተቀብሯል ምድር ከርሞ ጥጃ	0
በቃ ይህ ፖሎቲካን በ ቤተክርስቲያን ስም መጫዎት አመል ሆኖባችሁ ቀራችሁ ጃን ሜዳ በ ኮሮና ምክንያት ገባ ቦታ እንደሆነ ከንትባዉ ደጋግሞ ሲናገር ሰምታቹሀል መስቀል አደባባይም ቢሆን ብዙ ሰው መያዝ እንዲቺልና መድረኩም ደረጃዉን በጠበቀ መልኩ እንደሚሰራ ያዉ አንተም ሳሰማ ቀርተህ ሳይሆን ለሚ ከፈልህ ገንዘብ ህዝብ ማዉዛገብ ፈልገህ ነው	0
ገሀነብ ግባ ማን እናተ የ አርበኟችን አምኖ ይቀባጥራል ከከቲባችን ላይ ወረድ ያንተን ሰካራምህን እስክድርን ጠበቅ እሺ እኛ ሰላም ነው የምፈልገው ቆይ እናተ ግዴታ ወጣቱ ሲሞት ትደሰታለህ	0
አቢዬት አደባባይ የሁሉም ኢትዮጵያዊ ቦታ ነው እጅ የአንድ ሀይማኖት ቦታ አይደለም እንከባበር	0
ንበሳ የጀግንነት ምልክት አጥፍቶ ፒኮክ ያደረገ መንግስት ለዚ ምን ይበግረዋል	0
ድንግል ማርያም ትፍረድበት የኦርቶዶክስ ቱፊት ማጥፋት ቀላል መስሎታል	0
አንዳንዶች ኮመንታቸው ይገርማል ያዘመን አልፏል ምና ምን ይላሉለመሆኑ ቤተክርስቲያኗ ቦታውን ዝም ብላ የያዘችው ይመስላችሗልንለማንኛውም ልንገራችሁ ቤተክርስቲያኗ የምታከብራቸው የአደባባይ በአላት በዩኒስኮ በማይዳሰስ ቅርስነት አስመዝግበዋለች	0
ሀገሪቱም ገቢ እያገኘችበት ያለ የሀገር ሀብት እንጂ ሌላ አለመሆኑን አወቃችሁ ከቤተክርስቲያኗ ጎን እንድትቆሙ ለማለት ነው	0
ቆይ ግን መስቀል አደባባይም ይሁን ጃን ሜዳ የመላው የኢትዮጵያ ህዝብ አደባባዮች እንጂ የቤተ ክርስትያን ይዞታዎች አይደሉም ክርስትያን አማኞች የመስቀል በአልን መስቀል አደባባይ ላይ እንደሚያከብሩት ሁሉ እኛ ሙስሊሞችም ከስታዲየም ጀማሮ አብዮት አደባባይን አልፎ እስጢፋኖስ ቤተ ክርስትያን ድረስ የኢድ ሰላትን እንሰግድበታለን ስለዚህ ቦታው የ ሚሊየን ሙስሊሞችም ቦታ ነው	0
ቤተ ክርስትያን ለኢትዮጵያ ምን ያላደረገችው አለ አመድ አፋሽ ሆነች እንጂ	0
ከሚመጡ ቱሪስቶች የኢትዮጵያ ኦርቶዶክስ ንብረት የሆኑትን አክሱምን ላሊበላን ግሸንን ጎንደር ግንብን የጣና ደብርን ለማየት ነው ለነብስም ለስጋም የምትጠቅም ነበረችግን ታያለህ እንደተሾፈባት አትቀርም	0
የእምነታችንን መሰረት የሚንድ ተግባር ስለሆነ ከንቲባ ፅቤቱ መልስ ሊሰጥበት ይገባል	0
ትንቢት ይፈፀም ዘንድ ግድ ነውይሄንን መንግስት የላከው ይሄንንው የአውሬውን ጉዳይ ለማስጨረስ ነውገና ብዙ ያጠፋል ከዛም ይጠፋል	0
የመስቀል አደባባዩ ደመራን እንዳናከብር አያደርገንም እዛ ቦታ ላይ ሊደረጉ የሚችሉትን ፕሮግራሞችንና እስፖርታዊ እንቅስቃሴዎችን እንደማይነካ ታሳቢ ተደርጎ ነው የጃንሜዳው ግን ጊዜያዊ ነው ኮሮና ከጠፋ በኋላ ወደቦታው ይመለሳል ያለውን መጨናነቅ ለመቀነስ ነው	0
ታከለ ኡማ በአስቸኳይ ማብራሪያ እንዲሰጥ የሁላችንም ድምፅ ያስፈልጋል	0
እንሱማ ምን ያድርጉ የመጡትም እምነትን ለማጥፋት ነው እቅዳቸው የኛ ሌቦች ናቸው እነአቡነ ማትያስ ምንይሰራሉ ይህንን ካልተከላከሉ የነሱ መቀመጥ እነሱም እምነት የላቸውም ማለት ነው	0
መንግሰት ሊወድቅ ሲያምረው ቤተ ክርስቲያን ይጋፋል ተውት ዝም በሉት በራሱ ሊፈርድ ነው	0
ድሮም አህዛብ አገር አገር ሲገዛ ታሪክ የለ ቅርስ የለ እምነት የለ ዝም ብሎ ባውቃለሁ ባዪነት ማፍረስ	0
አብይ ስልጣን ከያዘ ጀምሮ በየቦታው እያጠፋ ነው ያለው	0
ይሄ ኬኛ የሙባለው ቃል ካካ ነው ተጠየፊት ቦታው ለሁሉም ዜጋ የሚበቃ ነው ሀገር የገነባችው ሀገር ስትለማ እንዲህ የሚያማት ከሆነ የሀገር ግንባታዋ ተረት ተረት ምኑ ጋር ነው ስለዚህ ሀገር ስትለማ ማንኛው ሀይማኖት መደሰት ሲገባው አያለቃቅስም	0
የአደባባይ በአላት ሁሉም እምነት በሚፈልገው መልኩ በሚለማው ስፍራ ኬኛ ሳይል ማክበር ይችላል ኬኛ የምትለው ቃል ግን ለማንም ሀይማኖት አታዋጣም	0
እርግጠኛ ነኝ የአደባባይ ቦታ ፈፅሞ አይጠባቹም ህዝቡ ለበአል ስፍራ ሀይማኖት ሳይለይ ተገቢውን ስፍራ ሰጥቶ በአሉ በሰላም እንዲጠናቀቅ ያደርጋል ይህ ለዘመናት ያየነው ነው	0
ግዚአብሄር ይይላችሁ በእውነት እራሱ እግዚአብሄር በዘረጋት መሬት ላይ እናተ አዛዥ ፍራጅ ሁናችሁ የፈጣሪ ስም እዳይጠራ የተቻላችሁን ሁሉ የምታረጉ ሰወች በእውነቱ እግዚአብሄር ይይላችሁ ግፍ በጣም በዛ ይችን እናተ ቤተክርስቲያን በስቱ ታሳዝኗት አላችሁ እስከመቸስ ልኖሩበት ነው ከሚገርመው ቤተክርስቲያን የእግዚአብሄር እንደመሆኗ ለልጆቿ ብቻ አይደለም የምታስበው ለመላው አለምጅ	0
ሲጀመር መሪዎቻችን ልማትና እድገት በማለት ሌት ተቀን ይለፋሉ በሀይማኖት ረገድ ግን ግንዛቤ ያላቸው አይመስል በተለይ ከ አም በኋላ የመጡት ኦርቶዶክስ ተዋህዶን ለማጥፋት ቆርጠው ተነስተዋል ቤተክርስቲያን ሲቃጠል ቦታው በወረራ ሲያዝ ሰምተው እንዳልሰማ አይተው እንዳላየ መሆንን መርጠዋል ይባስ ብለው በራሳቸው ትእዛዝ ሲወርድ ሲዋረድ የመጣውን ሀይማኖታዊ በአል ማክበሪያ ቦታችንን ቆሻሻ መጣያና ሽንት ቤት መስሪያ ለማድረግ ትእዛዝ በመስጠት ቁፋሮ አስጀምረዋል	0
መሪ ያለህዝብና እምነት ዋጋ የለውም ፈጣሪ ቅን ልቦና ይስጣቸው	0
ይህ በእውነት የተሳሳተ ሊሆን ይችላል መረጃው እንጂ ታከለ አሁን እየሰራ ነው ከምንባለው በየሚዲያው ከምንሰማው አንፃር በፍፁም ይፈፅመዋል ብዬ አላስብም	0
ከተፈፀመ ግን በእውነት የምን ኢኮኖሚ የምን ገቢ ምናም ዳር ዳር ማለት ነው እንቅጩን መናገር ነው ከዚህ ተግባር እጅ መሰብሰብ ያስፈልጋል	0
ለመሆኑ የኦሮምያ ቤተክህነትን ያቋቋመው ማን ሆነና ነው ለመሆኑ የመስከረም አራቱ ህዝባዊ ሰልፍ ከ በላይ ቲሸርት ከታተመ ብሇላ በማን ትዛዝ ተረረዘ የቤተ መንግስት አንበሳ ፈርሶ የፒኮክ ሀውልት ሲሰራ የትኛው ህዝብ አስተያየት ተፈለገ አየህ ወንድሜ ለነሱ ለኦርቶዶክስና የአማራን ጥቅም ለማሳጣት ከሆነ ሌት ቀን ብለው ስራቸውን ከመስራት የሚከለክል አንዳችም ሀይል የለም	0
እረምንድ ነዉ ቁጣ ቁጣ እያላችሁ ምፅፉት የሰሞነ ህመማትን ደብዳቤ ህዝብን ለአመፅ ጠርታችሁ አልተሳካም አሁንም የሁሉም አደባባይ በአል ማክበርያ የሆነውን ቦታ የኔ ነዉ ማለት አስገራሚ ነዉ	0
የቤተክርስቲያኒቱ ይዞታ ክክክ ካርታ እና ፕላናችውን አሳዩና የእናንተ የዞታ ለመሆኗ ማረጋገጫ	0
ሁለቱም ቦታዎች የመላው የኢትዮጲያ ህዝብ ቦታ እንጂ የእናንተ ብቻ ማን አረገው ጅሎች እናንተ እኮ ፊት ሲይልሳዩዎችው ምነው ሽንቴ ሚሪንዳ ነው አላችውሳ የነፍጠኛው የአፄ ስረእት እናንተ ምታልሟት ላይ መለስ ተቀብሯል አፄዎቹን የፈለገ በሰላም ወደ መቃብር ይሄድ ሁልግዜ አዲስ አጀንዳ እየፈበረካችው አትጃጅሉ አቦ	0
እኛ የራሳችን ሰው ለመንግስት አሳልፈን እየሰጠን እያሳደድን መንግስት ደግሞ እኛን እያሳደደ ነው ከተጀመረ ቆየኮ ገና ብዙ እናያለን ለክፉ ህዝብ ክፉ መንግስት ይሉሀል ይሄ ነው	0
ቤት ያለ ምሰሶ እንደ እማይቆም ሁሉ የኢትዮጵያ ትልቁ የአንድነት ምሰሶ የኦርቶዶክስ ቤተክርስቲያን ናት ስለዚህ ጥንቃቄ ይደረግ	0
የፈለገችው ያክል ውሸት ብትራገብ እዉነትን አታሸንፍም አስመሳዮች አንደ አንበሳ ተነካ አደባባይ ተነካ እያላቹ የሚታላዝኑ አአ ካለችበት ፈቅ እንዳትል እንዳትለማ እንዳትዋብ በሀይማኖትና በቅርሶች ስም ተሟገቱ ብሎ ቀብድ የከፈላቹ አለ እንዴ ይህ ሀይል የኢትዮጵያን እድገት የማይፈጉ የዉጭ ሀይሎች ቅጥረኞች መሆን አለባቸዉ	0
ዝምብላችሁ አትንጫጩ መጀመሪያ የመስቀል	0
አደባባይ ፕላን አስራር እንዴት አንደሆነ ማወቁ	0
ጥሩ ነው ግን ይህ ግንዛቤ ሳይኖራችሁ በጭፍ	0
ይህ እምነት የጎደለው ከብት ክዚህ እርኩስ ተግባሩ እጁን ቢያነሳ ይሻለዋል ዋ	0
የኢትዮጵያ ኦርቶዶክስ ከፈለገች አዲስ መሬት ፈልጋ የራሷን ከተማ ትስራ እንደ ቫቲካን ከተማ እንጂ በየቦታው በቤተክህነት የተያዘው የአገር ሀብትና መሬት ለልማት መዋል አለበት	0
ለፖለቲካ ፍጆታ ተጠቅማችሁ ከሆነ የፃፍችሁት ስራችሁ ያውጣችሁ አያገባኝምም አይገባኝም በቤተ ክርስቲያን በኦርቶዶክስ ጉዳይ ግን አንገቴን እሰጣለሁ	0
ኦርቶዶክስ ሰፋ ያለ ብዙ ህዝብ መያዝ የሚችል ክፍት ቦታ ስለተገኘ ብቻ በአሏን ለማክበር ትጠቀምበት የነበረ ቦታ እንጅ የይዞታ የባለቤትነት ማረጋገጫ ካርታ ያላት አይመስለኝም	0
ስለዚህ ለወደፊቱም በአሏን ስታከብር ሰፋ ያለ ቦታ እየፈለገች ለጊዜአዊነት ፈቃድ በመጠየቅ ማክበር ትችላለች	0
መስቀል አደባባይ የኦርቶዶክስ ብቻ አይደለም ማን ባለቤት አደረጋቸው	0
ቤተክርስቲያንን እና ቅድስት ተዋህዶን ለማጥፋት እየተደረገ ያለው ሴራ ይከብዳል ግን ሲኖዶስ አባቶቻችን ወደ ፖለቲካው ገቡ ይሄው አሳልፈው ሰጡን ግን እታች ያላችሁ የእያንዳንዱ ሀገረ ስብከት ጳጳሳት የእያንዳንዱ አጥቢያ	0
አስተዳደሮች አባቶች ካህናት ሰባኪያን ማህበረ ቅዱሳን እንዴት ዝም አላችሁ የሚፈለገው እኮ አንድ ነገር ብቻ ነው ቤተ ክርስቲያንን ማስከፈት እና ምእመኑን በሙሉ በምህላ ፀሎት እንዲበረታ ማድረግ ያኔ እግዚአብሄር መልስ አለው ያከናውንልናል የመጣብንን መአት ሁሉ ያጠፋልናል ከዚህ በፊትም በዋልድባ ምክንያት የሆነውን አይተናል ሴረኞቹም ጠፍተዋል	0
ይሄ የኢሉሚናንት ስራ ነው በተለይ የኦርቶዶክስ እምነትን የሚጎዳ ነው ምክንያቱም እምነታችንን መበረዝ ነው አላማቸው አ	0
አምላክ ይርዳን እመቤታችን ምልጃዋ ልመናዋ ከኛ ጋር ይሁንልን አሜን	0
ባህልናቱሪዝም ሚኒስተር ምን እየሰራ ነውእነኚህን መስህብ ሀብቶች ከወዴት ሊጥላቸው ነውስለሆነም ተሎ ወደ ነበሩበት እንዲመልስ ድጋፍ ይደረግ ሌላው ይህ ሰውዪ ሂዶ ሂዶ ከቤተ ክርስቲያን ሀብትና ንብረት ላይ ነው የሚወሸቀውየብዙሀን ህዝብ መሆኑን አስረዱት	0
በ በአዲስ አበባ ምን ሲደረግ ነበር ያንሁሉ መከራ ስናይ የት ነበረች ሲጀመር በአደስ አበባ መስቀል አደባባይ የሚባል የለም ያለዉ ደርግ የህዝብ መቀመጫ ሳቀረው አሳምሮት የሰራው አብዬት አደባባይ ነው ጃንሜዳ ለፈረስ ጉግስ ለስፖርት የተዘጋጀ ነው ስሙ ጥምቀት ሜዳ ሳይሆ ጃን ሜዳ ነው	0
ይሂኮ ንቀት የተጀመረሁ አሁን አይደለም የቅርቡን ጊዜ ብናስታውስ የኦሮሚያ ቤተክህነት የሚለው ቡድን መግለጫ እንዳይሰጥ ቤተክርስቲያና ስትጠይቅ ምን ሆኖ እንዳለፈ የቅርብ ጊዜ ትውስታችን ነው	0
የቤተክርስቲያና አባቶች የሚያራምዱት ለዘብታተኛ አቋም በመሆኑ ገና ብዙ ዋጋ ያስከፍለናልቆሞ የሰቀሉትን ቁጭብሎ ለማውረድ መሞከር የዋህነት ነው	0
ምን ለማድረግ ተፈልጎ ይሆን እኔ ደማይገባኝ ይህች በሁለንተናዊ መንገድ ለኢትዮጵያ ብቻ ለአለም ህዝብ ባለውለታ የሆነት ተዋህዶ ውለታ ከመክፈል ይልቅ ለማጥፋት ጥረት ማድረግ ምን አይነት ሰይጣናዊ አመለካከት ይሆን እንኳን ለሀገሯ ከሀገር ውጪ ተዋህዶ የተዋህዶ ለጆች በምርምር ባገኙት እፀ መድሀኒት ከመፅሀፋችን ግእዙን ተምረው ይሄው አምን እፈወሱበት ይገኛሉ ከዚህ ባለፈ ለምርምር እእዝን ሀገራቸው	0
በጣም ትልቅ ድፍረት ነው አዲስ አበባ ማማሯ መልማቷ ጥሩ ነገር ነው ግን እዬ ይደብራል ምክኒያቱም ዝም ብሎ ጭቃ ቤት እየሰሩ ይፀድቅላቸዋል ካርታም ይሰጣቸዋል ለአገር ቱሪስት የሚስብ ነገር በሰራች በምን እዳዋ ነው ሲጀመር የሷን ያላማከለ ነገር እዛ ቦታ ላይ የሚሰራው ታኬ ጥሩ ስራ አልሰራክም አዝኛለው በጣም እግዴ ፈጣሪ ልቦናውን የመልስለት ከዛም ማስተካከያ ያርግበት እላለው ምን ይባላል ተሰሚነት ያላቸው ሰዎች ዝም ባይሉ ጥሩ ነው ዝምታ ሲበዛ ያሌለንም ይመስላል	0
ቆይ ሰውየው ምን እየሆነ ነው ፈጣሪስ እዴት ይታረቀን እዴ እነሱ እደወረርሽኝ ዘመን አመጣሽ ጫፍና ቂጥ የሌለው እምነት ለማሰፋፋት ሲፈልግ የነበረች እና ድንቋን ኦርቶዶክሰን ማሳደድ ተገቢ አይደለም በእምነታችን የተነሳ ነፍሳችን ታልፈለች አንጂ አይደረግም ቆይ የመጣብንን ቁጣ መቅሰፍት ሳንወጣው ለምን ወረርሽኙን ተገን በማድረግ እውነተኛዋን ኢትዮጰያን ለማጥፈት እንሩሩጣለን ረፉ እኛ ኢትዮጰያኖች ካለፉት ችግራችን የመጣው መከራ አሰተምሮናል ፍቅራችን አድነታችን እደሚሻለን አምነናል ለፍቅር ላድነት ብሩሁን ቀን ጠባቂወች ነን አቅጣጫ እየቀየራችሁ አታጫርሱን እባካችሁ ሁለት ቀን ለመኖር ሶስት ቀን አናስብ	0
ኛ የወደቅነው ቤተክርስቲያን ሲዘጋ ዝም ስንል ነው እኛ እኛ የወደቅነው ስጋ ወደሙ ሲመለስ ነው አባቶች እባካችሁ የመጣነው ልንሄድ ነው ግን ቢያንስ አካሄዳችን ይመር ከቤቱ አታርቁን ያኔ ሰይጣን በመጣበት ይመለሳል	0
አቤት ይህ ሁሉ የአንድ ሰው የፌስ ቡክ አካውንት ነው ጥላቻን ይዘህ አትዘልቅም በሀይማኖት ስም መነገድህን ቶው	0
አወቅሽ አወቅሽ ቢሏት መጣፉን አጠበችው	0
ይላል አማራ ሲናገር አባቶቻችን ሲጀመር ቀደም ብለው ራሳቸውን ቢያስከብሩ ኖሮ ይህ ሁሉ መደፋፈርና መናናቅ በአልተፈጠረም ነበር አሁን ምን የአዲስ አበባው ከንቲባ ታከለበት ኡማ የሚያደርገውን ህገ ወጥ ስራና ድፍረት ሀይ ሊባል ይገባል እንዲህ አይነቱን መናፍቅ ነውየሞቱ ዝንቦች የተቀመመውን የዘይት ሽቶ ያገሙታል የተባለው	0
ምክንያቱም ፕሮታስታንስ ስለሆኑ ነውበኦርቶዶክስላይ ይሄሁሉ ስቃይ የሜያመጡት ቤተክርስትያን አጥሩን እንኮን እንዳንሳለም በፖሊስ እየተዎከብን አስራታችንን ሳጥንለመክተት እፕልቻልንም መጠጥቤቱና ገበያው በሰውተሞልቶ የምነት ቦታመከልከል ያሳዝነናል እግዛብሄር በኦርቶድክስላይ እጁንየሜያነሳ ስውፍርድን ይስጠው	0
ሁለችንም ስለ ቤተ ክርስቲያን እነስብ የመንግስት አለማ ቤተ ክርስቲያንን የቤተ ክርስቲያን ያሆኑትን ነገሮችን መጥፋት ነዉ አለማ ፈጠር ይህን ክፉን መንግስት እነ ክፉን በሽታ የጥፋልን	0
ዳይ ወደ ተግባር ዝምታው ይበቃል ኦርቶዶክስ እመነት ተከታዮች በሙሉ አንድ ሆነን ይህን ድፍረት በጋራ ማስቆም አለብን በጣም በዛ	0
ኦርቶዶክሳዊት ሀይማኖትን ለማጥፋት መሞከር በእሳት እንደመጫወት ነው	0
ካፊ ቦታ ችግር የለብንም መንግስት ቁመ በደንብ አስብ ያለህዝብ አገር ብልፅግና አይመጣም ምላስ መጥፎ ናት ጌዜ በፈጣሪ ብቻ ነው ፁሙችን እያደርን በእምነት በፅናት በደስታ ምምንኑር ህዝብ ጠንካራ ነን ይህ ክብር ነው	0
እናንተ እንኳን እነዚህን የህዝብ ቦታዎች ቀርቶ ሀገሪቱም የኛ ብቻ ነት ከማለት አትመለሱም ቦታው የወል ነውና ጠብ ተውና ለሁሉም ምቹ ሆኖ እንድሰራ ይሁ በጊዜው አያቶቼ በጉልበተኞች ከቦታዎቹ ተፈናቅሎ ወደ አርሲና ባሌ ጫካ ተሰዶ ሞተዋል	0
ኦርቶዶክሳውያን በሙሉ ልንረዳው የሚገባን እግዚአብሄር ልክ እንደ ዋልደባ ገዳም ይህን ሀሳብ ያሰበ ያሳሰበ ያማከረ አጠቃላይ በዚህ በመንፈሳዊ እና በታሪካዊ ቦታችንላይ በስቸኳ ይ እጅን ብሎም እርኩስ የሆነ ሀሳቡን እንዲያነሳ ካልሆነ ግን ከዋልደባ ገዳም ይማር	0
ሌላው የሁሉም ኦርቶዶክስ ተሳትፎ ርብርብ ስለሚጠይቅ ዝም ማለት ስያስፈልግም በተባበረ ክንድ ጠላትን	0
ይህ ነገር በዝምታና በቸለልተኝነት የሚታይ ጉዳይ አይደለም ዛሬ ቁመን ካየናቸው ነገ ቤተክርስቲያኑ ለልማት ይፈለጋል የምንባልበት ጊዜው እሩቅ አይሆንም ምክንያቱም በአሁኑ ሰአት የኦርቶዶክስ ሀይማኖት ህጋዊ ከለላ የሚሰጥ የመንግስት አካል የለም	0
በመንግስት ከፍተኛ አመራሮች የሚደገፍ ሀሳብ ነው ማንኛውም የእምነቱ ተከታይ የተቃውሞውን ድምፁና ተግባሩን በልዪ ልዬ መንገድ ልንገልፅ ይገባል	0
ኢትዬጰያ እጆቾን ወደ እር ትዘረጋለች የሚለው ቃልየሀያላን ሀገረት ቃል አደለም የምትዘረጋው ደግሞ ቅድስት ቤተክርስትያን ስታዝን ስትከፋ ፍርድ ከፈጣሬ የምትጠይቅበት ጠይቃም የማታፍርበት የተራበ የሚጠግብበት የጠገበ ወድቆ የተራበ የሚተካበት	0
እያየን ነውበድሜያችን የአገሬቱ አጠቃላይ እምነት ኦሮቶዶክስ ሆኖ በግራ በቀኝ መነካካት አዋጪ አይደለም ችግር በመጣ ጊዜ ወደ ቤተክርስቲያን ፊት ኦዙሮ ያዙኝ ልቁኝ ማለት አያዋጣም ቢታሰብበት እላለሁ	0
ምናለ በዚህ ዘመን እንኳን እጃቸውን ከቤተ ክርስትያን ላይ ቢያርቁ	0
አረ ፈጣሪን ፍሯይንን የሰራ ያያል	0
አባቶች የገነቡትን መናድ የት ያደርሰናል	0
ዝምታ እስከመቸ ነው እምነታችን በዝምታ እና በማውራት አናስከብርም አባቶቻችን እባካችው ህዝብን የተግብር ስራ ስጡት እስከሞት የታመንን ነን አባት ሆይ ሁሉን የምታይ ፍርድህን ካንተ እንጠብቃለን	0
አፍጥነው ነገሩን አሪፍ ነው አንተ ነገሩን ባፈጠንከው ቁጥር ሞትህን ታፈጥነዋለህ የገዘለው መሳሪያ ያድንህ መስሎሀል ሰው ሁለት አሳብ ስለሆነ ነው በርታ ተቃዋሚ ጨምር እንደትኋን ገብተህ እንደ አንበጣ ትባረራለህበርታ	0
የታከለ ኡማ መንግስት ያልከው ነገር የድልቦች ንግግር ነው	0
እኔ የማውቀው የኢትዮጲያ መንግስትን እንጂ የግለሰብ መንግስት አይደለም	0
ሁለተኛ ሼር አድርጉ ብለህ የምታዘው ባንተ ጭፍን አይን ማንን ልትመራ ፈልገህ ነው ግራ ገብቶህ ሰውን ግራ አታጋባ	0
ይህ ቤተክርስቲያንን መዳፈር ስራዬ ብሎ የያዘው መንግስት መች ይሆን አርፎ የሚቀመጠው ክፉው የወያኔ መንግስት ያላደረገውን ጥፋት ቤተክርስቲያን ላይ እየፈፀመና አረመኔው ደርግ ያደርግ የነበረውን ክፋት እየደገመልን ነው ቤተክርስቲያን ሆይ አሁንም በአላውያንና መናፍቃን መከራሽ ቀጥሏል	0
አኔ እኮ የሚገርመኝ ይች ኦርቶዶክስ ቤተ ክርስቲያን ምን አደረገች ምን በደለች የምትገደለው የምትቃጠለው ከዛም አልፎ አፈቅቤ በሆኑ ባለስልጣን ተብየወች እየተታለለች ነው ስለዝ እባካችሁ እጃችሁን ከቤተ ክርስትያን አንሱልን ምን አልባት እናጠፋለን ብላችሁ ካሰባች ተሳስታችሀል ምክንያቱም እሱ ባለቤቱ ስለመሰረታት አጠፋም አትልፉ ግን ቆም ብላችሁ አስቡ	0
የመስቀል አደባባይ እና ጃን ሜዳ ህጋዊ ባለቤት ኦርቶዶክስ ቤተክርስቲያን ናት እንዴ ከሆነች መብቷን ሊከበርላት ይገባል	0
ድሮስ ሌላውንም ቢሆን እንደግላቸው መሬትና ቦታ ማንንም ሳያስፈቅዱ እየተጫወተቱበት ነው	0
ህዝቡ አሁን ለደረሰበት ወረርሽኝ ሲጨነቅ እነሱ ቅርስ መከባከብ ሲገባቸው ቅርስ እያጠፉ ነው ዝምታው ይብቃ ክብር ለሚገባው ክብር እንስጥ	0
የአብይ መንግስት ከኦርቶዶክስ ሀይማኖት ጋር የግል ቂም ያለው ይመስላል	0
እውነት ነው ይህን ታላቅቦታ ታቦተህጉ የጥምቀት ቀን የሚከብርበትና ደመራየሚደመርበት ቦታ ማሳጣት እጂግ በጣም በእግዚአብሄር ዘንድ የቁጣቁጣነው ስለዚህግን እባካችሁን ባለስልጣናት ባንድጉን ፀልዩ ትላላችሁ በሌላበኩል ደግሞ መሬት ትነጥቃላችሁ ይህቦታ በአስቸኳይ ወደቦታው ካልተመለሰ የፀሎት አባቶች እግዚአብሄር ማረን የሚለው ይቀርና እግዚአብሄር ፍርድ	0
ይቅርታ አርጉልኝ እና ውሀ ሽቅብ አይፈስብ ብቻ ብቻ አሁን አሁን በጣም እያዘንኩ ነው ችግሩ ግን እኛው ቤት ነው በፖለቲካ የምትመራ ቤተክርስቲያንን ማየት ከጀመርን ቆየን ለሌላ ነገር ቢሆን የሚወራጩ ዛሬ ዝም ለምን አሉ	0
ድሮም ከነሱ ምን ይጠበቃል ከዝንብ ማር መጠበቅ እንደማለት ነው በአለም ላይ በተለይ በሀገራችን ኢያ ይህ ሁሉ ችግር የመጣው እኮ የኦርቶዶክስ እምነት ለማጥፋት ነው ግድያው መፈናቀሉ የቤተክርስቲያንና ሌሎች ንብረት መቃጠሉ የብሄርና የቋንቋ ግ ጭት ካህናት መታረዳቸው ወዘተ	0
ጃል ሜዳም ለችግር ጊዜ ጊዜያዊ ገበይነት እንጂ ቋሚ ግንባታ አልመሰለኝም ይህንን ደግሞ የመንግስት አካላት ከማድረጋቸው በፊት የቤተክርስቲያኗ አባቶች ለህዝብ የሚያስቡ ከሆነ	0
እምነቱ ተዋዠቀ ሰው ምን ይጠቀቃል	0
ዘላለም ታፍራና ተከብራ የምትኖር ቤተክረስትያናችን	0
እዚህ ላይ ደርሳ ማየት ያሳዝኖል ይህ ጎዳና የዘመን	0
በጣም ድፍረት ነውና በሰላም ለቅድስት ቤተክርስቲያን ለኦርቶዶክስ ውሎ ሳያድር ቢመልስ ይበጀዋልይህ የእኛ የኦርቶዶክሶች ብቻ ሳይሆን የአገር ቅርስ ነውና በጊዜ ለባለቤቷ ቢመልስ ይሻለዋል	0
እደው ውይይይይ እኔን ግርም የሚለኝ ያም ተነስቶ ቤተክርስትያን ላይ ይፈራርቁባታል ምንአለበት ትንሽ እርፍት ስጣት እሲቲ ግፍ ነው ሁሌም ምቀኛ አያጣትም ኽርርርር ውይይይ	0
ለውጥ እንደዚህ ሆነ በቃ	0
በጣም ያሳዝናል አሁንስ በጣም	0
እባካችሁ እናንተ ባለስልጣናት	0
ምን ያድርጋቹ ይሄ ሁሉ አመት ሳሰሩ ከርማቹ አሁን የሚሰራ ሲገኝ ከፊት እንቅፋት መሆን ምን የሚሉት ነው ታኬ የሚሰራው ለሀገሩ ለኢትዮጵያ አይደል እንዴ አቦ ገለል በሉ ይስራበ	0
ምነዉ ያ ሁሉ ሰዉ ተሰብስቦ የሚቅምበት የሚያጨስበት የሚፀዳዳበት የኔ ቴዲ አፍሮ ኮንሰርት የሚደረግበት ቦታ የቤክ መቅደስ ነዉ አላችሁሳ የደንበጫ ቄሶች የአብን ጉዳይ አስፈፃሚ መሆናችሁን መቼ አጣነዉ የኛዋ ስንዱዋ እመቤትማ እንዲህ አይነት ቸነፈር የሚጠራ መግለጫ አትሰጥም የጎጃም ቡዶች እጃችሁን ከቤክ አንሱ	0
የነሱን ነገረ ፈጣሪ መልስ ይስጥበት እግረ በየተራ ይረግጣል የሚባለውን አበባል ህዝብ በየተራ ይረገጣል አረጉት	0
ያሳዝናል እየተባለ ዝምአንልም ካሳደገችን እናት ቤተክርስትያናችን ጎን በፀሎት እና በተፈለገወመስመር ሁሉ ከጎኗ መሆንአለብን	0
አንጀቱን ይቆፍረው ህገወጥ ከንቲባ እና ህገወጥ መንግስት እንዲህ በየጊዜው እያስለቀሱን እስከመቼ ኮሮና ቢያፀዳቸው ባለውለታችን ነበር	0
የብዙሀኑን ኦርቶዶክስ ሀይማኖታዊ ስሜት የሚነካ ነገር ሲፈጠር እባካችሁ ይታሰብበት ለማለት የግድ ኦርቶዶክስ ሀይማኖት ተከታይ መሆን የለብኝም በተመሳሳይ ሙስሊም ወንድሞች የሚያከናውኗቸወን ሰርአቶች በአንድም ሆነ በሌላ የሚጎዳ ነገር ሲፈጠር ሀይ ይባል ለማለት የግድ ሙስሊም መሆን አይጠበቅብኝም ለላውንም እንደዚያው በተለይ ኢትዮጵያዊነትን የምናስተውልባቸው ከሀይማኖታዊነታቸው ይልቅ ባህላዊ ቅርስነ	0
አወ ይህ መግስት ኦርቶዶክስ ተዋህዶ ለማጥፋ በቆራጥነት ተነስቷል በኮሮና ምክንያት በሚል ተልካሻ ምክንያት ቤተ ክርስቲያን እስካሁን ተዘግቷል እያዘጋም ነው በ ኛ ደረጃ የአባቶቻችንን በትክክል ኢትዮፅያዌነትን የሚገልፀንን የቤተ መንግስት ሀውልት አንስቶ እንደ አባቱ እርስ የፒኮክ ምስል የውጭ የቡሽቲ እምነት አስገባ እንግዲህ ይህ ሰው ምን ትሉታላችሁ በቀጥታ የ የውጭ እምነተ እያስፋፋ መሆኑ ግልፅ ነው	0
ደፒኮክዋ ሽብር አልሳካ ሲላችሁ በእምነት መጣችሁ ፈጣሪ ይቅር ይበላችሁ ሁሉም በነበረበት እንደሚመለስ ደጋግሞ ከንቲባው አሳውቋል ብቻውን የወሰነው ነገር የለም ምድረ ደነዝ መጀመሪያ አስተውለህ እይ ስማ ከዝያ ፖስት ያንተ ላይ ጫጫታ ነው መሬት ላይ ያለው እነውነታ ግን እዝያው ዩሉ ዜጎች ስለሚመለከቱ አትድከም ሽብርህን አረጋጋው	0
አወቅሺ አወቅሺ ሲሉት ምን አጠበች እንደሚባለው ሆነብኝ አዲስ ሹፌረ መሪ ማወዛወዝ መገጮገጪ ዪኖራል ሲባል ዝም አልን ግን እስከመቼ	0
ቆይ አሁን በሞላ ቦታ እንደዚ አይነት መሰረተ ልማቶችን ሲያስቡ ለምን አዲስ ቦታ አያለሙም ዘለው የተከበረ ታሪክና ለቱሪስት መስህብ የሆኑ ቦታዋች ላይ ከማቀድና ሁሌም ሀገሪቱን ወደ ብጥብጥ ሰላም ማጣት ቅራኔ ውስጥ ከሚከቷት	0
ይህ መንግስት ከገባ በሀላ እኮ ሳይታወቀን በአፍ እያታለለ ኦርቶዶክስ ን በጣም እያጠፋነው አልታወቀንም እንጂ እኛ እሄማ የማይ ሆን ነው በጭራሽ የተዋህዶ ልጆች ድምፃችንን እናሰማ	0
እቺ የቤተክርስቲያን ተቆርቃሪ በመምሰል አገር ለማመስ የወያኔ ሴራ ነው ምእመናን አትሞኙ	0
ይህ ቦታ ምን እደሚደረግበት ቦታው ከዚ በፊት ምን እደሚከናወንበት የኢትዬጲያ ኦርቶዶክስ ሳትሆን በአለም ያሎ ኦርቶዶክሶች ያቃሉ ለሱ መስሎኝ ዪኒስኮ ላይ ተመዝግቦ ለሀገርም ለአለምም ኩራትና ቱፊት ሆኖ እዚ የደረስነው ዛሬ ምን ተገኘ ሀብት ስልጣኔ ነው ኦርቶዶክስ ለምን ዝም ብሎ ተቀመጠ አልያም ብዙ ማለት ይቻላል እግዚሀብሄር አለ በዙፋኑ ይፈርዳል አይፍርድም አትበሉ የሚሆነውን እናያለን	0
ሀይማኖት ስም ህዝብን ለማፋጀት አትሞክሩ እባካችሁ ሀይማኖት ለሁሉም ፍጥረታት የሰላም መስበኪያ እንጅ ደጦርነት መቀስቀሻ አይደለም እውነት የከቸማ አስተዳደሩ የወሰደው እርምጃ ትክክል ካልሆነ የሚመለከተው አካል ከአስተዳደሩ ጋር መደራደር ይችላል	0
ቤተክርስቲያኒቱ የራሷን አደባባይ እስተዛሬ አስከብራ ምእመኑ ለምን እንዲያለማው አልተደረገም ችግሩ የሲኖደሱ ቸለልተኝነት ቢመስልም የአዲስአበባ አስተዳደር ግን ይህን የሰፊውን ህዝብ መብት የሚጥስ አይመስለኝም	0
መች ይህቺ አለም መነሻና መድረሻዋን ታውቃለች የሚረገጥ ያገኘች ሲመስላት ትፈነጥዛለች እንጂእስኪ ተዋት ኦርቶዶክስ ተዋህዶን አትፈታተኗት የእስከዛሬው አይበቃም ዛሬ ደግሞ ምን ታርጋችሁመቼም በዚህ ወቅት ባለው ችግር ልባችሁ ደንድኗል ባንዴ የሚያጠፋን ሌላ መቅሰፍት እንያ ብላችሁ ነው መሰል ለመቀሰፍ የምትታገሉት	0
ቤተ ክርስቲያን የዘጋው የአድስ አበባ ህዝብ ብቻ እኮ ነው እኛ አንሞክረውም ሰለጠን የሚልና ምሁር ህዝብ ያለበት ይመስለኝ ነበር ግን እንዴ ህፃን ቁጭ በል ሲሉት የሚቀመጥ ህዝብ ነው ያለበት ገና ብዙ ነገር ይወሰዳል	0
በዚህ ስራቸው ኮሮናን የሚያስመሰግን በሽታ እንደሚመጣ አትጠራጠሩ	0
ቤተክርስቲያንን እና ቅድስት ተዋህዶን ለማጥፋት እየተደረገ ያለው ሴራ ይከብዳል ግን ሲኖዶስ አባቶቻችን ወደ ፖለቲካው ገቡ ይሄው አሳልፈው ሰጡን ግን እታች ያላችሁ የእያንዳንዱ ሀገረ ስብከት ጳጳሳት የእያንዳንዱ አጥቢያ ቤተክርስቲያን አስተዳደሮች አባቶች ካህናት ሰባኪያን ማህበረ ቅዱሳን እንዴት ዝም አላችሁ የሚፈለገው እኮ አንድ ነገር ብቻ ነው ቤተ ክርስቲያንን ማስከፈት እና ምእመኑን በሙሉ በምህላ ፀሎት እንዲበረታ ማድረግ ያኔ እግዚአብሄር መልስ አለው ያከናውንልናል የመጣብንን መአት ሁሉ ያጠፋልናል ከዚህ በፊትም በዋልድባ ምክንያት የሆነውን አይተናል ሴረኞቹም ጠፍተዋል	0
ዶክተር አቢይ መንግስታዊ አስተዳደር ሁሌም ቢሆን ቤተክርስቲያን ላይ ያነጣጠረ መሆኑን ሁሉም የሚያውቀው ሀቅ ነው ግን ለመሆኑ ቤተክርስቲያን ምን አጠፋች ሰላምን ፍቅርን አንድነትን በሰበከች ይህን ያክል ጫና ለመሆኑ መንግስት ሊጠፋ ሲል ከቤተክርስቲያን ጋር ይጣላል ነው አባባሉ ነገር የሀይማኖት አባቶችም ዝምታ ነው ቤተክርስቲያንን ያስደፈራት ሁሉም ሊገነዘበው የሚገባ ነገር ቢኖር ከዚህ በኋላ ወደኋላ መሄድ ይብቃን መንግስት እጁን ከቤተክርስቲያን ላይ ያንሳ	0
የአጋዚተ አለም ስላሴ የወላዲተ አምላክን የቅዱሳን መላይክትን የሰማታትን የፅድቃንን ታቦት ተይዞ ለመርገጥ እየፈራን የቆምንበትን ቦታ መፀዳጃ ቤት ግዴለም የሚፈስ ደማችን የሚቆረስ ስጋችን እንጅ ነፍሳችን አይደል ለማንም አይጥ ውሻ በልማ አታደርጓት	0
ኧረ ተዉእንዲያ ነው እንዴ ነገር ሁኦኡም የናንተ ሁሉም ለናንተ ስታደርጉ ምንም ስለሌላው ደንታ ቢስነቱ አልበዛም አደባባዩ እኮ የኢትዯጵያ ህዝብ ሲከፋው ቁጣውን የሚገልፅበት ሲደሰትም ደስታውን የሚጋራበት እንዲሁም ሲያዝን ሀዘኑን የሚገልፅበት ሙስሊሙም በአመት ሁለት ጊዜ ኢድ የሚሰግድበት ዋቄፈታውም እሬቻ የሚያከብርበት ፕሮቴስታንቱም የራሱን መርሀግብር የሚፈፅምበት ኦርቶዶክሱም በአመት	0
የቤተክርስትያንን የይዞታ ማረጋገጫ ካርታ ቤተክነት ድረስ የሰጠው ሁለቱን ሲኖዶስ አንድ ያረገው ማነው የተሻለ መስቀል አደባባይ የተሻለ ጃን ሜደ እናያለን ብልፅግና ወደፊት በ	0
እግዚአብሄር ዝም አይልም ምን ቦታ አላጡ አውቆ ነው ፈጣሪ ወደ ልባቸው ይመልሳቸው ሀቁን እንዲያውቁ ልቦና ይስጣቸው ፈጣሪ አረ አያደርጉትም	0
አር እነ ታከለ ኡማ እባካችሁ አትዲርሱብን እባካችሁ እናተ ዲንቁርቁር ባላችሁ ሰውን አበጥብጡ በናተ የተነሳ እኛ ጦርነት ማሳት አለብን ቆይስቲ ነገር እባካችሁ አቦ ይቺ ቀን ትለፍልን	0
እግዚአብሄር ይሄን ሁሉ ቆሻሻ የሚያፀዳበት ቀን ቀርቧል ውድ ኦርቶዶክሳውያን ነቅተን ንስሀ ገብተን እንጠብቅ ብዙ የተደገሰብን ነገር አለ የትንቢት መፈፀሚያ እንዳንሆን እንፀልይ	0
ከተማ አስተዳደሩ ሆን ብሎ ኦርቶዶክስ ለማጥፋት ሌትተቀን እየሰራ ይገኛል ከዚህ ድርጊት በአስቸኳይ ሊቆጠብ ይገባል	0
ውነትአባቶቻችንመጀመርያአብረውከፖልቲካጋራአብረውእፍፍብለውነበርለዚህነውእውነትለቤተክርስትያንማንነውአላፊነትመበትማስከብረውእውነትይህነውትርፉ	0
እግዚአብሄር እረቀ ሰላሙ ያያውርድልን ከመጣው መቅሰፈት ያድን ዘንድ ነስሀ እንግባ የህይወት ጉዞ እንጀምር	0
የኦርቶዶክስ ሀይማኖትን ለማጥፋት ታከለ ኡማ በአለቅዮው መናፍቃን ታዞ የሚፈፀመው መሆኑን እንድታውቁት	0
ትልቅ ጠላት አለቅዮው ነው	0
የሀ ገና ጅማሮ ነው መስቀ ሀይላች መድሀኒታች መሆኑ ቤተክርስትያን እየመሰከረች በኮረና ምክንያት በማድረግ እንዳትሳለሙ ማለት ያልተው ለዝህ በሀይማኖታችን ካልበረታን ሌላ ፈተና ይመጣናል የሀ የማንቂያ ደወል ይቀጥል በሁሉም ክልሎች	0
በመጀመሪያ አብዮት አደባባይ እንኳን የኦርቶዶክስ ቤተክን አይደለም ምነው እናንተስ ሀይ የሚላችሁ ጠፋሳ ለእምነት ክብር መስጠት ሌላ በእምነት ስም መሬት መውረር ሌላ እረ እያስተዋልን	0
በተለያየ ምክንያት ቤተክርስቲያንን ከመቦርቦር እባካችሁ ባለስልጣን ተብዬዎች ብትታቀቡ ተው ድፍረት ጥሩ አይደለም አሁን የምትሰሩት ቤተ ክርስቲያንንና ተዋህዶ እምነትን ክርስቲያኑን መጨፍጨፍ ይቁም ልቦና ይስጣችሁ ደሞ ይጮሀል ስልጣን ለመልካም ነገር ተጠቁሙበት	0
ሊያጠፉን ነው የመጡት ቀድመውንም ይጠፋሉ ስልጣኔም ይመስላቸዋል ግን ሰይጥነዋል የሚሰሩት መጀመሪያ ታሪካችንን ነው ማንነታችን ቢገባቸው	0
ተዋርደህ ከምትሞት የክብር ሞትን ተቀበል ስራውን በተወካዮቻቸው አማካኝነት እየሰራ ነው	0
እነሱ ናቸው ተጠያቂ የኔ ቤተክርስትያን ሲቃጠል አገልገዮቿ ሲገደሉ እርስቷ ሲወሰድ የአድስ አበባ ህዝበ ክርስትያን ሰልፍ ሊወጣ የአቀደውን ያስቀሩት እነሱ ናቸው ያው እየገፋ መጣ ገና ከዝህ በላይ ይሆናል	0
አባቶቻችን ራሳቸው ችግር አለባቸው መንግስት ስር ተወሽቀው ይከርሙና ለመልሰው ችግር ያ ራሉ ቤተክርስቲያንን ማስደፈር አልነበረባቸውም	0
መስተዳድሩ ኛ ማስፈቀድ ኛ ማማከር ይገባዋል ባለቤቱን ካልናቁ አጥሩን አይነቀንቁ	0
እግዚአብሄር ማስተዋልን ይስጣቸው አሁን እኛ ከውጭ ላሉ እህት ወንድሞች የምንችል ለእምነቱ ተከታዮች ሼር በማድረግ በአስቸኳይ እንዲቆም እናድርግታከለ ማለት እኮ ላይ ወታደር ልኮ ይህ የቤተክርስቲያን ቦታ ነው ፀሎት ሲያደርሱ የነበሩ ወንድሞቻችነነ ተኩሰው እንዲገሉ ያዘዘ ነው	0
እኔ ኦርቶዶክስ ነኝ ከነ ዘር ማንዘሬ ግን ይሄ ፓትራሪክ እኔን አይወክልም ምክንያቱም የወያኔ ቅጥረኛ ስሆነ አለቀ እውነተ ይሄ ነው እንጂማ እንየ ወያኔ በኦርቶዶክስ ቤተክርስቲያን ላይ የቀለየባት የዘረፋት የሸጣት የበዘበዛት የለም እባካችሁ ትላንት ለፈጣሪያችሁ ሳይሆን ለሆዳችሁ አድራችሁ ቤተክርስቲያኗን ስታዘርፈ እና ስትዘርፉ የነበራችሁ ጥቅመኞች ተውን ተውን ስለ ድንግል ማርያም ብላችሁ ተውን	0
ቀስ በቀስ ማንነታችንን እያጣነው እያሳጡን ልብ ብለናል ግን በጣም በዛ እየሸረሸሩን ነው ከቀን ቀን	0
በእውነት ግፍ በዛ አሁንስ ምነው እንድህ አይነቱን ኮረና ቢለቅመው አቃጠላቸው ውይ ጉድ ውይ ድፍረት መንስት ሲጅመር አክሱም ሲዳፈር የአባቶቻችንን አደራ የቅድሳንን ስፍራ ንቆ ብዙ ሲለፈልፍ ዝም ተባለ አሁንም ስራውን አላቆመም እረ እመቤቴ መልካሙን መንግስት ምረጭልን	0
በሀይማኖት ቀልድ የለም ይልቅ ቀልዱት ትተው በአግባቡ ህዝቡን ቢያገለግሉት ይሻል ነበር ግን ምን ዋጋ አለው ሁሉም እራስ ወዳድ ነው	0
ትንንሽ ስህተቶችን አብረን እንደጭቃ ካቦካን	0
ዛሬ ትልቁን ስህተት አይ ብንል ማን___ለምን ለምን ለምን የሚሉ ታማኝ ህዝቦች እየደከሙና ተባባሪ እያጡ ደክመው ደክመው እዚህ ደረስን ሁሉም ሰው የስራቸው ተባባሪ ከሆነ ቆየን ቢሆንም ግን አሁንም ከጎናችሁ ___አለንነን___ህብረታችን ለአንድ አላማ ነውና	0
ሀይማኖት የላቸውም ወይ ፈጣሪም ዝም አለ ኧረ ገብርኤል እባክህ አሳየን	0
ቀድሞ ነበር እንጂ መጥኖ እጅህ እስኪላጥ አ ጨብጭበህ አህዛብን ስትሾም ነበር ማሰብ	0
እንሰሳ ምን ሀይማኖት አለው አትፍረዱበት እንኳ ወንበር አግኝቶ የጠገበለት አይቻልም እናቴ ሲርበው ያውቀዋል	0
ኮረና እየተባለ ጉድ አፈሉ ቤተክርስትያን መስኪድ መዘጋት የለበትም ነበር ሁሉም በፆሎት ይጠፍል ይሄ የፈጣሪ ቁጣነው	0
ይኸ እምነትአልባ ነው ከኦርቶዶክስጋር የሚፋጠጠው አባቶች ቢፀልዩ ነው መፍትሄው ከዚህ የበለጠ እንዳይመጣብን	0
ይህ ነገር አሁን ካልቆመ ሸገርን የማሳዋብ ፕሮጀክት የወንዞች ልማት ሰበብ ብዙ የፀበልና ያምልኮ ቦታ ሊፈርስ ይችላል	0
ይሄ ሴራ ሆን ተብሎ ቤተክርስቲያኖን ለመጉዳትና ለማዳከም እየተሰራ ያለሴራ በመሆኑ የሚመለከተው ክፍል ሊያስብበት ይገባል ፀረ ቤተክርስቲያን በዝተዋል መናፍቃኑን ቁልፍ የሆነ ቦታ በማስቀመጥ የኦርቶዶክስ አማኞችን ከስራ በማፈናቀል ልዮ ሴራ እየተሰራ ነውና ሲኖዲዮሱ ለኦርቶዶክስ አማኝ ልጆቹ ከጎን በመቆም መብታችንን ማስከበር ይኖርብናል	0
ወገኔ ንቃ ቤተክርስቲያን ተዘግታ ገበያው ደርቷል ለሀገር ኢኮኖሚ መውደቅ እየታሰበ ኦርቶዶክስንም ለመጣል እየተሞከረ ነው	0
አረጎበዝ ይብቃ እራስመውደድ ቢያስ እኳን ታሪክ መስራት ባንችል እኳን የነበረውን ታሪክ ሲጠፋ ዝም አንበል	0
ይህ ታከለ ኡማ የሚባል ሰው ከስልጣኑ ካልተወገደ ቤተክርስቲያን እና የአዲስ አበባ ህዝብ ጨምሮ ገና ያጠፋቸዋል	0
ህዛች ቦታ ላይ ምንም ሀይነት ልማት ብሎ ቢያለማ ቤተክርስቲያኒቱን ንቆ ልማት አለማለዉ ቢል ድንግልን እናጋይለታለን እሱም አይጠቀምበትም እኛም አንጠቀምበትም የኦርቶዶክስ ልጆች የሌሎ መሰለዉ እንዴ እሳት ጎርሰን አንበሳ መስለን እነነሳልካለን ታያለክ ሀገሪቶን በአንድ እግር ስናቆምልክ ሞክረዉ ቤተክርስቲያ ከሌለች መብቶ ካልተከበረላት ሀገርም የለችም ማለት ነዉ	0
ይህ የአሁኑ ትውልድ መጨረሻው ዘመን ላይ መድረሳችን ነው ማለት ነው የትንቢቱ ምልክት እየታየ ስለሆነ ነው	0
በትክክል ኧረ ጎበዝ ይቺ ጥንታዊ ሀይማኖት አበው መንግስት ምን አስቦ ነው ይህንጨድርጊት ሊፈፅም የቻለው	0
የሁላችንም የያገባኝል ጮሀት መሆን አለበት ጭራሽ በጉልበት ሆነኮ	0
መጨረሻው ዘመን አጠፍም እንጅ ታጥቀው ተነስተዋል በቤተክርስቲያን	0
እች አገር የኦርቶዶክስ ናት ወይስ የህዝብ የመንግስት ናት ማነው መየሚያስተዳድራት	0
አምላክ ሀይልህን ግለፅ ኮረና እያሉ ሀይማኖትን ለማጥፋት አይሴራ አይሳካ	0
የአፍርካመንግስትበክላሽእንጂ ሀይማኖትንአያውቅም	0
ጉራማይሌ የሆነበት አለም ወይ ዘላለማዊ የሆነውን የእየሱስ ክርስቶስን መንግስት ምረጥ ወይ ጊዝያዊ ተለዋዋጭ ጠፊ የሆነውን ምድራዊ መንግስትን ምረጥ በአንድ ግዜ ሁለት ነገር መምረጥ የለም	0
ለሁለት ጌቶች ልትገዙ አትችሉም	0
እኔ ከአለም እንዳይደለው እናንተም አይደላችሁም ካለ ቤተክርስቲያን ሳይመለከታት ሮጣ ፖለቲካ ላይ ለምንድነው የምትንጠለጠ	0
እኔ የሚገርመኝ አገሩን ምን እያረጉት ነው እነዚ ሰዎች ጉድ እኮ ነው አንድን ተው ሲባሉ ሌላውን ይሄ ነገር ግን መጨረሻው አያምርም	0
እነዚያን ቦታዎች ለኦርቶዶክስ ብቻ የሰጠዉ ማነው ቤተክርስቲያኗ የባለቤትነት መታወቂያ ደብተር ካላት ታሳይ	0
እስኪ ሁልጊዜ ህዝብ የሚያጋጩ ፅህፏችን ለመፃፍ አንጣር ታኬ ይህን ያደረገው በፊታችን የተጋረጠውን አደጋ ለመቅረፍ አስቦ ነዉ እባካችሁ እንረጋጋ ሁሉም ያልፈል	0
አስደናቂናአስደሳችም ነውቤተ ክርስቲያን የሁላችንም ናትእያንዳንዳችን በሀሳብበገንዘብ በጉልበትበፀሎትና መረጃ በማሰራጨት ግዴታችንን እንወጣ	0
ያማረ ካቴድራል ተሰርቶ ሲያልቅ ፕሮፋይል ማድረግ ሳይሆን ሲሰራም የአቅማችንን እናድርግመረጃው ሼር ይፈልጋልበብዛት ሲሰራጭ ብዙ በገንዘብ የሚረዱ እህትና ወንድሞች እናገኛለን	0
በብፁእ አቡነ አብርሀም ሀሳብ ጠንሳሽነት በባህር ዳር ከተማ ድንባቄ አካባቢ በኢትዮጵያ ብሎም በአፍሪካ የመጀመሪያው ካቴድራል ሺህ ካሬ ሜትር እየተገነባ እንደሆነ ያለፈው አመት ፅፌ ነበረስራው የተጀመረው የካቲት ቀን አም ነው	0
ተራረው ጫፍ ላይ ግዙፍ መስቀል ይተከላልየመስቀሉ ከፍታ ሜትርወደጎን ሜትር ሲሆን ኢትዮጵያ እጆቿን ዘርግታ የሚያሳይ ሀውልት ይገነባለታል	0
ወደ ተራራው ለመውጣትም ሊፍት ይሰራለታልመስቀሉ ተሰርቶ በማለቁ በ ቀን ወጣቶች መስቀል ሀይላችን ነው እያሉ በመዘመር ወደ ተራራው ተሸክመው አወጥተውታል	0
ይኼ ግዙፍ ፕሮጆክት ከ ሚሊዮን ብር በላይ ይጨርሳል ተብሎ እቅድ ተይዞለታልከኙ ፕሮጀክቶች ሁለቱ የሀገረ ስብከቱ ፅቤት እና ፅርሀ ፅዮን ቅድስት ማርያም ካቴድራል እየተሰሩ ይገኛሉ	0
ስለሆነም በእቅድ የተያዙትና የተጀመሩት ፕሮጆክቶች ተሰርተው እንዲያልቁ ያቺየኔያንተየሁላችንም ድርሻ በመሆኑ የምትችሉትን አግዙ	0
ቄስነህ ፓለቲከኛ ግራ አጋባሀን እኮለማንኛውም እንኳን ደስ አለህ የአማራን ፓለቲካ ቀስበቀስ አፈር ድሜ እያበላሀው ነውየተለያዩ እምነት ባለበት ሀገር አንድን እምነት የሚያጎላ ነገር ማድረግ ከጥቅሙ ጉዳቱ ያመዝናል	0
ከመቅናት እናንተም በመቃብራችሁ በላይ የጨረቃን ምስል መትከል ትችላላችሁ በእንግድነት የተቀበላችሁን ህብረተሰብ ግራ ባታጋቡ ጥሩ ነው በህግ የተፈቀደ ቦታ ነው እንጅ ዝም ብሎ በወረራ የተያዘ አይደለም በክርስቲያኑ ስራ ብቻ ነው እናንተ ምትነሱ ከአእምሮአችሁ አንቅታችሁ ምትሰሩት የላችሁም እንዴ	0
ሙስሊሞች በሀረር በጂማ በወሎበ አሩሲ በወራቤ በጂጂጋ በሰመራ በ አሶሳ በከሚሴ	0
ብፁእ አባታችን ራጉኤልን በሚያስተዳድሩበት ዘመን ታላቅ ስራን የሰሩ አባት ናቸው ስለሆነም ይሄንን በእሳቸው መሪነት በኦቶዶክሳውያን ትብብር ተሰርቶ ለፍፃሜ ይበቃል በዚህ በሰሜን አሜሪካ መጥተው ፕሮጀክተቸውን ገለፃ አድርገው እርዳታ ሲያሰባስቡ ነበረ በእለቱም አብረን ነበረ ያገለገልነውና	0
እቅዳቸውን ስሰማ ለመቼ አልቆ አይተነው ያላለ የለም ከፍፃሜ ያድርስልን	0
እሳቸውም ስራቸውን እቅዳቸውን ያስፈፅምልን	0
የባንክ ሀሳብ ቁጥር የላቸውም ወይ	0
አደባባይ ላይ ተራራ ላይ የአንድ እምነት መገለጫ ማድረግ ቅራኔን እንጅ ፍቅርን አያመጣም በዝች ሀገር ሁሉም እምነት እኩል መብት አለው ድሮም አንድ መሆን ያልቻለው አማራ አሁን ጭራሽ ፈረካክሳቹሁታልከዚህ በሀላ መስማት የማልፈልገው ቃል አማራ የሚለውን ነውእኔ ሙስሊም ነኝ ተናግረናል የአማራ ብሄርተኛ የመጨረሻው ግብ የኢትዮጵያ የክርስቲያን ደሴት የሚል ብሂል ማስፈፀም	0
ይሄ እንደማይሳከ አውቃቹሁታልአሁን አማራ የክርስቲያን ደሴት ማድረግ ነው ግን አይሳካም	0
ቄስ ነህ ፖለቲከኛ ብዙ እምነት ባለበት ሀገር አንድ ሀይማኖት ማጉላት አይገባም ልዩነት የሚፈጠርበት ግንብ ነውምናምን የምትሉ የሰይጣን አሽከሮች ቁርጣችሁን ልንገራችሁ እወቁ ኢትዮጵያን ከክርስትና ክርስትናን ከአምሀራ ፍቅርን ከገንዘብ ህይወትን ከትግል የክርስቶስን ሰውነት ከአምላክነቱ ለይቶ ማየት አይቻልም ይህ ማለት ግን እያንዳንዱ ነገር ለብቻው ፍፁም አይደለም ማለት አይደለ	0
በጣም ጥሩ ሀሳብ ነው	0
ሁላችንም ለዚህ እጅግ ውብና አስደናቂ ካቴድራል ቤተክርስቲያን የበኩላችንን ለነፍሳችንም አሻራ የሚያስቀምጥልንን የበረከት ስራ በገንዘብና በቁሳቁስ ድጋፍ ማድረግ አለብን	0
ሁሉም ለዚህ የተቀደሰ ተግባር ሊረባረብ ይገባል	0
እግዛብሄር ስራው ድንቅ ነው በሰወች ላይ አድሮ አሁንም ታምር ይሰራል ፈጣሪ ያበርታን ኦርቶዶክስ ዘር ወይም ጎጠኝነት ጥቁር ነጭ አትልም ሰውን በአድ መርከብ ውስጥ አቅፋ ከማእበል ከጎርፍ ከማት ከመከራ ሸሽጋ ለአምላኳ ማቅረብ ነው ጠበብተኛ ሀይምሮ ያላችሁ ጥፈኞች ዝም በሉ ምነው ባጎርስኩ ተነከስኩ ሆነ እኛ ተቀብለን ኑሩ ላልናች አንኖርም አለችሁ የእናንተን አድም ነገር አልነካንም አትጫጩ አሁንም መስቀል ሀይላችን ነው መስቀል የነፍሳችን መዳኛ ነው አይሁድ ይክዱታል እኛ ግን እናምነዋለን ያመነው እኛም በመስቀሉ እድናለን ድነናልም	0
የተተከለው ቤተ ክርስቲያን ያለበት ቦታ በመሆኑ ማንንም የሚነካ አይመስለኝም ጭር ሲል አልወድም ባዩ	0
በጣም ገራሚ ነው	0
እንዴት ደስስ ይላል እግዚአብሄር ሁሉንም ያሳካልን	0
በርቱ በውጭ ላለነው በሚታመን ሰው አማካኝነት ቢከፈት ጥሩ ነው	0
እንዲህ አይነት ሀሳብ እንዴት ደስ ይላል እግዚአብሄር ያከብርልኝ	0
ወንድሜ በርታ የምታቀርበው አሳብ በሙሉ ደስ ይላል እኛንም መድሀኒአለም ፈቅዶ የበረከቱ ተካፍይ ያድርገን ላንተም ቃለ እይወትን ያሰማልን	0
የካህናት ማሰልጠኛ ተመችቶኛል በእውቀት የታገዘ እምነት ሙሉ ነው በርቱ	0
ፈጣሪ ይመሰገን አትንኩን ሰትነኩን ቁጥራችን ይበዛል ፈጣሪ ፈቅዶት ቤተ መንግሰት የተወገደው የፈጣሪ ምሳሌት የአንበሳ ሀውልት አማራ ክልል መታነፅ አለበት አማራ ማለት ትክክለኛ ኦርቶዶክሰ ሰያሜ ነው	0
እግዚሀብሄር ይመስገን ኢትዮጲያንና ህዝቦቿን እግዚሀብሄር ይጠብቃት ነገር ግን በዚህ በክርስትና እምነት ጣልቃ ገብታችሁ የምትቃወሙ ሁሉ ባለማወቅ ነውና እግዚሀብሄር ይቅር ይበላችሁ	0
በርቱልን ወገኖቻችን ድንቅ ስራ ነው በፀሎትም በገንዘብም እንተጋገዛለን መስቀል ሀይልነ	0
ሁላችንም ለዚህ መልካም ሀሳብ መረባረብ አለብን ኢትዮጵያ እጆቿን ወደ እግዚአብሄር ትዘረጋለች	0
አካውንቱ ቡኩ ላይ ያለው መጨረሻው ነው አንተ ከፃፍከው ጋ ስለሚለያይ ይስተካከል ወንድሜ	0
አሜን አሜን የተዋህዶ ልጆች ለሀይማኖታችን እንሞታለ	0
የተቀደሰ ሀሳብ እንዴት ደስ ይላል በርቱ	0
ዋው በጣም ደስ ይላል ልኡል እግዚአብሄር ለፍፃሜው ያብቃን	0
ሰይጣንና የርኩሳን መንፈስ የቤተክርስቲያኗ መሰራት ያቃጥላቸዋል	0
ምነታችን የየግላችን አገራችንና ሰንደቅአላማችን የጋራ ነው	0
በጣም የሚያስደስት ስራ ነው በርቱ	0
እባካችሁ ካቲድራል ኦርቶዶክስካቶሊክ ምናምን አትበሏንዲት ተዋህዶ እንጂ	0
ካቴድራል ማለት ምድነው	0
የሚያቅ ያስረዳኝ ለምንስ ካቴድራል ይባላል	0
ስለ ሁሉም ነገር እግዚአብሄር ይመስገን	0
ሁለቱንም የያዘ ዩኒቨርሲቲ ህልሜ ነበር	0
እሽ እናመሰግናለን ያቅማችን እንረዳለን	0
እጅግ በጣም ደስ ይላል የምንችለውን ሁሉ እንረዳለን ነገር ግን ይሄ ካቴድራል ማለት አልገባኝም ግእዝ ነው አማርኛ ነው ብታስረዱኝ	0
ታዴ አካውንቱ አይሰራምቁጥሩ ልክ አይደለም ነው ሚል	0
ዋው በጣም ገራሚ ነው እግዚአብሄር ይረዳን ለፍፃሚው	0
ተመስገን የምትዘባርቁ ሙስሊሞች ታረሙ መካ መዲናን ማን ነካባችሁ ይች እኮ ሀገረ እግዚአብሄር ናት ቅር ካለህ ወደ መጣህበት	0
ካቴድራል የምትለዉ ለሮም ፖፕ ነዉ እንዴ የሚሰራዉ አቡነ መልከፀዴቅ እግዚአብሄር ይይሎት	0
መስቀል መሸከም የክስቲኒያ ደሴ ማለት ሰባት መቶ አመት ያቆጠረ ነው ግን ደሴትነት ዛሬ ላይ ተቀብሯል የለም ክርስቲያን ኦርዶ እየመነመነ ነው ኢትዮ ኦርቶ አብቅቷል	0
አላማው ምንድን ነው ይቅርታ ስላልገባኝ ነው	0
መልካም ስራ ነው ክፉ የሚያስበው ሰይጣን ያፍራል ምድረ ገነት ግዮንንም አያያትም	0
ሁሌም በዛ ቦታ ሳልፋ ስራውን አያለሁ እግዚአብሄርም እንደሚያግዘን አልጠራጠርም	0
ይቅርታ አስቀድሜ ልጠይቅና ካቴድራልና ተዋህዶ ምን ያገናኘዋል	0
ደስ ይላል አብሮ ህዘበ ክርስቲያኑ ላይም ቢሰራ	0
ታደለ ጥበ ቡ ስለ መስቀሉ ሀይል ነው የመሰከረው ምን ላይ ነው ፖለቲከኛ ያሰኘው	0
መጨረሻው መስጊድ ነው የሚሆነው	0
እንጨት ብትቀጣጥሉ ምንዋጋ አለው	0
ጥሩነው ግን ፀረ ተዋህዶዎች ስትፋሳችሁ ይዘጋና አናችሁ አይቅላ የራሳችሁን ማንም አልነካ	0
እረ የተተከለውን አሳዩን	0
ከሙስሊም መካነ መቃብር አካባቢ መስቀል መትከል በፅእኑ እንቃወማለን	0
አማራ ሩሱን በራሱ ቀበረ በለኛ	0
ፈጣሪ ለፍፃሜ ያብቃን	0
ቀላል እንልካለን እናመሰግናለን	0
ደስ እሚል ክብሩ ይስፋ	0
ዋው በጣም ደስ ይላል እግዚአብሄር ይመስገን	0
በስማም ወይይይይ እግዚአብሄር ይመስገን ሲያም	0
እናበኢትትዮብያሁሉምእኩልነውምንአቃተላችሁባገራችንምየቻልነውንማድረግአንችልምዴማንምንከለከላችሁእናንተምበሀይማኖታችሁማድረግያለባችሁካለማድረግነውግንዝምብላችሁየሴታንሀሳብአታስቡነገረኖችሳውዲአረቢያየገባንመሰላችሁእዴደግሞባገራችንአፍችሁንአትክፈቱትአፍችሁንዝጉት	0
ታዴዋ እናመሰግን አለን በርታልን አይዞህ	0
በጣም ደስስስ ሲል ኦ አምላኬ ተመስገን	0
መድሀኒአለም መጨረሻውን ያሳየን	0
ዋው ፍፃሜውን ያሳምርልን በጣም ደስስስ ይላል	0
ሰሞኑን በእስረኞች መፈታትና በአድዋ በአል ምክንያት ተዘንግተዋልአሁንም ተስፋ ባለመቁረጥ የልጆችን መጨረሻ እስክናውቅ ድምፃችንን እናሰማ	0
ብልፅግና ኦፌኮ ኢዜማ አብን ሁልህም የፖለቲካ ምሁር ነኝ የፖለቲካ ፓርቲ አመራር ነኝ የምትል ለድምፅ ቆጠራ ብቻ የተሰለፍክ የእህትህ የልጅህ የሚስትህ የእናትህ መታገት እንዴት አያስጨንቅህም የሴት ልጅ ስቃይ መከራ እንዴት አያምህም ፖለቲካ ያለ ሴት ልጅ ተሳትፎ ከንብ ያለ ቀፎ ማር እንደመጠበቅ ነው	0
እኔ እምለው የአማራ ህዝብ ሲያጨበጭቡ ማጨብጨብ ነው እንዴ አሁንማ ወገኔ ተስፋ እያስቆረጠኝ ነውበለፈ ሰላማዊ ሰልፍ ሲደረግ የካቲት እንገናኝ ተብሎ ነበር	0
ብዙ ያልተመለሱ ጥያቄዎችስ	0
እንዲያውም ሰሞኑን ስለ አባይ እና አሜሪካ ብቻ ነው እሚወራው	0
በጭራሽ እንረሳቸውም	0
እግዚአብሄር አምላክ ይርዳቸው እኛማ አንድ ሰሞን ለወረት በየሚዲያው ተንጫጫን ምን አመጣን ልብ ይሰብራሉ	0
በጣም ያማል	0
ወይ ከማለት ውጪ ምን አመጣሁ ኡኡኡኡ ኧረ መጨረሻቸው ምን ይሆን እኔስ ተስፋ ልቆርጥነው በህይወት ይኖራሉ ብዬ አላምንም ወር ጫካ እውነት የሉም እራስን ማታለል ነው የያዝኩት የውነት ደከመኝ	0
በጣም ያሳዝናል እመቤቴ ድንግል ማርያም የሁሉም እናት እና አማላጅነሽና አንች ፈጥነሽ ድርሽላቸው ለቤተሰቦቻችሁ ልቦና ስጫቸው	0
እደሰዉ የማትሆነዉ እመብራሀነ እስትድረስልቸዉ	0
እግዚአብሄር አምላክ መፍትሄ ያምጣላቸው ለህቶቻችን	0
ታሪኩ እንደ ሰው ልጅ መውደቅ መነሳት የበዛበት ገዳም ነውበተደጋጋሚ ተቃጥሏልጠፍ ሁኖ ቆይቷል	0
የደብረ ሊባኖስ የመጀመሪያው ቤተከርስቲያን በቅድስት ድንግል ማርያም ስም በ አምተሰራ	0
በ አምእንደገና ሁለተኛዋ ቤተ ክርስቲያን በቅድስት ድንግል ማርያም ስም በእጨጌ ቴዎድሮስ ዘመን ታነፀች	0
አም በአፄ ይስሀቅ ዘመን በእጨጌ ዮሀንስ ከማ አማካኝነት ሶሰተኛዋ ቤተክርስቲያን በቅድስት ድንግል ማርያም ተሰርታ ሰኔ ቀን ቅዳሴ ቤቷ ተከበረ	0
በ አም እጨጌ መርሀ ክርሰቶስ አም አራተኛዋን የቅድስት ድንግል ማርያም ቤተ ክርሰቲያንን አሰራ	0
ብነድንግል ዘመነ መንግስት አምስተኛው ቤተ ክርስቲያን በእጨጌ ጴጥሮስ አማካኝነት ተሰራግራኝ ሀምሌ ቀን አምያቃጠላት ይህችን ቤተ ክርስቲያን ነው	0
በአፄ ገላውዴዎስ ዘመነ መንግስት በእጨጌ ዮሀንስ አማካኝነት በግራኝ የተቃጠለው ስድስተኛው ቤተ ክርሰቲያን ተሰራ	0
የደብረ ሊባኖስ ማሀበረ መነኮሳት ወደ ጎንደር በአፄ ሱስኒዮስ ዘመን ተሻገሩገዳሙም እየተዘነጋ ሄደ	0
በኛው መክዘ መነኮሳት ወደ ጥንቱ ደብረ ሊባኖስ መመለስ ጀመሩ	0
የሸዋው ንጉስ ወሰን ሰገድ ሰባተኛውን ቤተ ክርስቲያን አትጋፊኝ በተባለው ቦታ ላይ ሰሩነገርግን ከወራት በኋላ ተቃጠለ	0
ዮሀንስ የጥንቱን ቤተ ክርሰቲያን ቦታ አስፈልገውና አስመንጥረው ኛውን ቤተ ክርስቲያን ስራ በአኩስም ፅዮን መልክ ባለ ጉልላት አድርገው ጀመሩ	0
በ አም አፄ ዮሀንስ ያሰሩት ቤተ ክርስቲያን ከ አመታት በኋላ የውጭና የውስጥ ስራው አልቆ ታቦቱ ገባ	0
•በ አም አፄ ምኒልክ ኛውን ቤተ ክርስቲያን ማሰራት ጀመሩ	0
በ አምዘጠነኛው ቤተክርስቲያን ተጠናቀቀ	0
በ አምግንቦት ቀን በግራዝያኒ ትእዛዝ የደብረ ሊባኖስ መነኮሳት ተጨፈጨፉቤተ ክርስቲያኑ ተቃጠለቅርሱ ተዘርፎ ሮም ተወሰደ	0
በ አም አፄ ሀይለ ስላሴ አሁን ያለውውን ኛውን ቤተ ክርስቲያን ማሰራት ጀመሩ	0
በኦሮሚያ ክልል በአፍ መፍቻ ቋንቋ ቅዳሴ መቀደስ አለበትስበከት መሰበክ አለበትመፅሀፍ በኦሮሞ ቋንቋ በላቲን ፊደል መፃፍ አለበት ተብሏል ነበረም ይሁን	0
በ አም አሁን ያለው አስረኛው ቤተ ክርስቲያን ተጠናቀቀ	0
እንደዚህ ከሆነ ደግሞ በተመሳሳይ በኦሮሚያ ክልል የሚገኙ ሙስሊሞች አዛንን ጨምሮ ሌሎችንም ፀሎቶች በአፍ መፍቻ ቋንቋቸው ኦሮሚኛ መሆን አለበት	0
የኦሮሞ ሙስሊሞች የአፍ መፍቻ ቋንቋቸው እያለ አዛንፀሎትና መሰል ተግባራትን የሚከውኑት በአረበኛ ቋንቋ ነውበመላው ኢትዮጵያም በተመሳሳይ	0
ሌላው ቢቀር ቁራን በየመስጊዱ የሚገኘው በአረበኛ ፊደል የተፃፈው ነው	0
መፅሀፍ ቅዱስቅዳሴውስብከቱ በአፍ ቋንቋ መፍቻ በኦሮሚኛ ይሁን እንደተባለው ሁሉ አዛን እና መሰል ፀሎቶች በኦሮሚኛ መሆን አለባቸው	0
ቁራንም በኦሮሚኛ ቋንቋ በላቲን ፊደል ተፅፎ ለየመስጊዶች መሰራጨት አለበት	0
ማይሆን ከሆነ ጉዳዩ ሌላ ነውጃዋር የተባለ ሰው በተመሳሳይ ይኼን ጥያቄ ማንሳትና መደገፍ አለበትውነተኛ የኦሮሞ ሙስሊሞች ጥያቄ ሊያነሱ ይገባልምክንያቱም አላህ ኦሮሚኛ ይሰማል	0
ተሸውደክ ነው ቅዳሴ በግእዝ ነው ቅዳሴው ላይ ያሉት ንባብ ነክ ነገሮች በአማርኛ እንደሆኑ ሁሉ በኦሮምኛ ይሁንልን ነው ጥያቄአቸው	0
ያን ጥያቄ ምንን ያነገበ ነው እኔ አላውቅም ወደ ኢስላም ስትመጣ አዛንና ሶላት በመላው አለም አረቢኛ ነው	0
ሙስሊሞች ግን ነጭ ጥቁሩ አንድ ላይ ቆሞ ነው የሚሰግደው ሚስጥሩ እዚህ ጋር ነው	0
ኢጭ ሰው ስለራሱ ይናገራልጅ የሌላወገንም እንደኛ ካልሆነ ይባላል ምን አይነት አስመሳይ የበዛበት ዘመን ነው አሁን ደግሞ ለምን የሙስሊሞች እንደኛ በኦረምኛ አልተባለም አሉ ብላችሁ ሙስሊምና የክርስቲያኑን ወገን ለማጋጨት የምትጥሩ ሰወች እግዚአብሄር ይገስፃችሁ	0
ታደለ ጥበቡ እስከዛሬ በሚፅፋቸው ነገሮች በጣም ነበር የሚመቸኝ ዛሬ ግን በጣም ወርዷል	0
ከመውረድም አልፎ ተንኮታኩቶ ነው የወደቀው ምክንያቱም እኛ ሙስሊሞች በኦርቶዶክስ ተዋህዶ ቤተ ክርስቲያን መካከል በተፈጠረው ክፍተት እጅጉን አዝነናል	0
እንዲሁም በሴረኞች ስራ ተበሳጭተናል ነገር ግን ታደለ ጥበቡ ቤተ ክርስቲያኗ እንዳትከፈል ለማድረግ ከመጣር ይልቅ ሙስሊሙ ልክ እንደ ክርቲያኑ ሁሉ	0
አቅመ ቢሱን ባል ማንን ትችላለህ ቢሉት ተጣድፎ ሚስቴን አለ	0
ህ አባባል አንዳንድ ክርስቲያኖችን በደንብ አድርጎ ሳይገልፃቸው አይቀርም የራሳቸውን የጓዳ ችግር መፍታት ሲያቅታቸው እና የኦሮሞ ኦርቶዶክሶችን ቆራጥ ውሳኔ መቀልበስ ሲሳናቸው	0
ፊታቸውን ወደ ሙስሊሙ ማዞራቸው ገርሞ የሚገርም ነው ይህ የሚያሳየው ኢትዮጵያዊ ሙስሊም ምን ያህል ለስላሳ እና ሆደ ሰፊ መሆኑን ነ	0
እኔኮ ግርምምምም የሚለኝ የራሳችሁን ችግር እዚያው በራሳችሁ ቤት ለምን እንደማትጨርሱ ነው	0
በኦሮሚያ አካባቢ በኦርቶዶክስ ዙሪያ ለተፈጠረው ችግር እኛ ሙስሊሞች ላይ የምታፈጡት ለምንድር ነው እኛ ላይ ስላፈጠጣችሁ የእናንተ የውስጥ ችግር ይፈታል ማለት ነው ወደ ቤተ ክህነት ለተወረወረው ጥያቄ እዚያው ቤተ ክህነቷ ትወጣው እንጂ ወደኛ ማማተር ምን ይጠቅማችኀል	0
በአገራችን ቁርአን በ ቋንቋ ተተርጉሞ በስራ ላይ ይገኛል ገና አቅም ካለ በ ቋንቋ ይተረጎማል እንሻ አላህ	0
የኦርቶዶክም ሆነ የሀገራችን የፖለተካ ችግር እንዳይፈታ ከሚያደርጉ ጉዳዮችና አተያዮች ውስጥ እንደዚህ አይነት ከአውዱ ጋር የማይገናኝ ጉንጭ አልፋ ክርክር በሚያደርጉ ፕሮፓጋንዲስቶች ነው	0
አሁን በዚህ ሰውዬ ቤት ቤተ ክህነቷ አጣብቂኝ ውስጥ ስላለች ለሙስሊሙም አጄንዳ ፈጥሮ ሁሉም የነውጥ ቅርቃር ውስጥ ለማስገባትና በሙስሊሙ ጥቅም ላይ ተረማምዶ የቤተ ክህነቷን ችግር ለመፍታት ነው	0
አንድን ችግር ለመፍታት የምናደርገው ጥረት ቸግሩን የበለጠ የሚያባብስ ከሆነ ቢቀር ይሻላል ለአማራ ትግል ፍሬ ማጣትም አንዱ ችግር ጥላት ማብዛት ነው	0
አዛን በኦሮሞኛ አይሆንም እንጅ ቢሆን እንኳ የኦርቶዶክስ ቤተክርስቲያን ላይ የተነሳውን ጥያቄ ይመልሳል እየውልህ ወዳጄ አለም ላይ ያሉ ሙስሊሞች በሙሉ የሚጠቀሙበት ቁርአን አንድ ወጥ እና በአንድ ቋንቋ የተፃፈ ነው አምልኮውም ቢሆን እንደዚያው	0
ምንም እማይገናኝ ማጭበርበር ነው እምትሞክሩት ኢትዮጵያ ውስጥ መቼም ሙስሊም እና ክርስቲያን አይጣሉም እናንተ ኢትዮጵያን ለማፍረስ መንገዳችሁ ግራ ነው	0
የራሷ አሮባት የሰውን ታማስላለች አሉ እውነቱን መጋፈጥ ሲያቅታችህ ወደ ሙስሊሙ ዞራችህ ሲያምረህ ይቀርል አታስብ የኦሮሚያ ሙስሊሞች እና የኦሮሚያ ኦርቶዶክስ ተዋህዶ ቀድመው የእናንተን መሰሪነት የተረዱ ናቸው በካንቱ አትልፉ	0
ታደለ ጥበቡ ችግሩ አልገባህም በደምብ ለመረዳት ሞክር አንዴ ከመፃፍህ በፊት ሶስት አራቴ አርገው ምክንያቱ ብዙ ተከታይ ስላለክ የዛሬው ጦማርህ ግን በጣም ወረደብኝ	0
አባት ችግርህን እዛው ፍታ እኛ የተወዳጁ ነቢይ ሰሀወ ተከታዮች የአንድነት ችግር የለብንም አደለም ኢትዮጵያ በመላው ያለ ሙስሊም መንገዳቸው አንድ ነውነፍጠኛ ኦሮሚያ ወስጥ ገብቶ የአይማኖት መሪ የሚሆንበት ጊዜ አክትሟል	0
የእኛ እንደሆነ ለዚህ አይመችም ቁርአን የወረደው በአረብኛ ነው አዛን የሚደረገውም የሚሰገደውም በሱ ነው ነው ይልቅ ለዚህ ተባብረን መፍትሄ እንፈልግ አባ	0
ማንም የከለከለ የለም ቁም ነገሩ አቻ ፍችውን ተጠቅመው ይተርጉሙት እንጂ ደሞም ተተርጉሞ ለምእመኑ መተላለፍ ከጀመረ እጅግ በጣም ቆየ እኮ በኦሮምኛ ብቻ ሳይሆን በተለያዩ ቋንቋዎች ሁሉ	0
ግን በላጩ አረብኛውን ማወቁ ነው አላህ ቁርአንን ትገነዘቡ ዘንድ በአረብኛ አወረድንላቹ ብሎ እዛው ቁርአን ላይ ቁልጭ አድርጎ ነግሮናል በተረፈ ህዝቡ አረብኛውን ማወቁ የግድ መሆኑ እንዳለ ሆኖ በፈለገው ቋንቋ ሊያባዛው ክልከላ የለበትም ግን ያልገባኝ ነገር አንተ ጥያቄህ ማንንም ሳታስታክክ መጠየቅ መብትህ ሆኖ እያለ ማመካኘትህ ተገቢ መስሎ አይታየኝም	0
ሲጀመር አላህ ጣኦት ሆኖ እንዴት ነው ኦሮሚኛ የሚሰማው	0
ትክክል ሲጀመር ጉዳዩ የኬኛ ነገር ሁኖ እንጂ መፅሀፍ ቅዱስ በኦሮምኛ ከተተረጎመ ዘመናት አለፉ ስብከትም መዝሙርም እንደዛዉ ነገሩ ሀይማኖትን ተደግፈዉ ሁሉ ኬኛ ለማለት ተፈልጎ እንጂ ሙስሊም ነዉ ብሎ የልደ ሊቀ ሰይጣን ጃዋር መሀመድ ታዳ ለ ህዝብ እንዴት አላሰበላቸዉም ቁርአንን ለምን በኦሮምኛ ለምን አልተተረጎምም እንዳዉም ቁርአን አረብኛ አይደልደ	0
ቁርአን ላልከው ትርጉም አለ በኦሮምኛ	0
አረበኛ ቁርአን የወረደበት አለማቅፍ ቋንቋ ሲሆን አማረኛ እና ግእዝ ግን ብሄር አቀፍ የመንደር ቋንቋ ነው	0
ኦሮሞኛ ቢበልጠው እንጅ አያንስም	0
ለማንኛውም ቁርአን ኦሮሞኛ ትርጉም አለው ሲቀጥል የተለያዩ ፀሎት አይነቶች በኦሮሞኛ ይደረጋሉዷዋ ይደረግበታል አበቃ	0
የአማራ አክትቢስቶች በጣም ነው የምትገርሙኝ ሁላችሁም መርህ አልባ ናችሁ	0
ጎርፍ ነገር በተከፈተው ሁሉ መጉረፍ ትወዳላችሁየራስን እምነት ለመስከበር የሰውን እምነት መበጥበጥ የትም አያደርስም	0
እስልምና ቀልድ አያውቅም እንደናንተ ፈጣሪውን በፈለገውቆንቆ መለመን ይችላል ቁርአን ግን አረበኛብቻ ነው እንደናንተ የሰውቃል አይደለም ከፈጣሪ ለነብዩ ሙሀመድ ሰ አ ወ የወረደነው	0
ስማ ጮማ ራስ እኛጋ ዋናው እስልምና መቀበልክ ነው ብሄረሰብ በራሱ ቋንቋ ቢተረጉመው ችግር የለም ምክንያቱም የሚቀነስ የሚጨመር ነገር የለም ሚኒልክ የፃፈው መሰለክ እንዴ	0
በሁሉም የቋንቋ ብቀደስ ምን ችግር አለው	0
በግእዝ የተፃፈ ቁራን እንዳለ ያውቃሉ	0
ሰተት ውስጥ እንዳት ገቡ ቋንቋ እግዚአብሄር ብፈጣሪ ኖሮ ለምን አንድ አይሆንም	0
ቆይ አሁን በዚህ ይቀናል ለምን የአለም ሙስሊም አንድ ሆነ አለም መከፋፈል ካልቻል እንኳን ኢትዮን እንከፋፍል ነው	0
እያማራችሁ ይቀራል እስከ የመል ቂያማ ድረስ አይቀየርም አዛን በመላው አለም በአረብኛ ይቀጥላል ኢንሻ አላህ	0
የራሳችንን ችግር እራሳችን እንፍታ ይሄ አውሬ የናት ጡት ነካሽ የወጣው ከኛው ከራሳችን ጉያ ነው ይሄ ደሞ የመጀመሪያው አውሬ አይደለም የመጨረሻም አይሆንም የሚጠቅመንና የሚያዋጣን ዝምታችንን ትተን የተወረወረውን ተቋቁመን መክፈል ያለብንን ዋጋ ከፍለን ወደ ነበርንበት እንመለስ ከዛ የራሳችንን ችግር ከፈታን በኋላ ለመተዛዘብም ሆነ እንደ ሰው ለመወቃቀስ ያስችለናል	0
አኛ ሙሰልሞች ምንም ችግር ይልብንም ሰው በመግባው ቁንቁያ ቁርአንን ትርጎምው ማሰትማር ይቻላል ቁርአን ወደ አንግልዝኛ ተትርጎሞል ኦሮሞውች ግን ቁርአንን የመትርጎም አቅሞ ይላችሁም ጭንቅላታችሁ በዘርኝነት ትድፋኖል ዝም በላችሁ ሁሉ ኬኛ ሁናችዋል ሰግብግቦች የራሳችሁን ችግር በአራሳችሁ ፋቱ ሙሰልሞን አትጭምሮት	0
የኛና የናንተ እምነት መካከል የአርናየማር ያህል ልዩነት አለ	0
ገምታችሁ አታግማሙን	0
ለምን ከእስልምና ጋር ታያይዛለክየአለም ሙስሊም በሙሉ የሚጠቀመው አረብኛ ነው	0
የናንተ እብራይስጥኛ ግን ኢትዮፅያ ውስጥ የለም በአማርኛ መቀየር ከተቻለ ኦሮሞኛ ለምን አይቻልም የነሱም ጥያቄ ይሄው ይመስለኛልትክክል አላህ ሁሉኑም ቋንቋ ይሰማል እስልምናን ስላልተረዳክ ይሆናል እንጅ እስልምና ለሰው ልጅ አምራጭ የለለው ሀይማኖትና እና ከጎደሎ የፀዳ ነው ብህውሀት እና ኦሆዴድ ወይም በፖሎትካ ምቀየር ምጨመር አይኖርም እስከ አለም ፊፃመ ድሬስ ያው እንደነበር ይቀጥላልግን ቁርአን በአለም ባሉ ቋንቋዋች	0
ቁርአን ተቶርጉሞ በየመስግዱ ብሰራጭ ላልከው ግን አድርገውት ነው ትውልዱ የበለጠ ሀይማኖቱን ይረዳል ሙስልሞች ግን ከኦሮምኛ አረብኛን ከብሀራቸው እስልምናን እንደምወዱ አትዘንጋ	0
ታደለ ሀክ ተደረገ እንዴነው ክርሲቲያን አማኝ ነኝ የሚል ጠፋ ግራ አጋባህን የእስልምና አስተምህሮት የምታውቅ አለመሰለኝም አንብ አንብ	0
ታደለ ጥበቡ ምነው ወረድክ ወንድሜ ይሄ ጉዳይ በኦርቶዶክስ ወንድማማቾች መካከል የተፈጠረ ልዩነትአለመግባባት ነው የሚፈታውም በጉዳዩ ባለቤቶች በራሳቸው በኦርቶዶክስ አባቶች ነው	0
አንተ ግን ዘለህ ስለ ሙስሊሞች መዘባረቅህ ምን ማለት ነው ኦርቶዶክስ ላይ የተፈጠረው ልዩነት ሙስሊሙ ላይ ቢከሰት ለእናንተ ችግር እንደ መፍትሄ መቁጠርህ በጣም ገራሚ ጉዳይ ነው	0
ብዙ አስተያዬት ሰጭዎች አልተረዳችሁትም ይመስለኛል መልእክቱ ለማለት የተፈለገው አድሬሱ ለቅዳሴ ሽፋን አማርኛን ከኦሮሚያ ለማጥፋት ለሚታትሩ አማራ ጠል የኦሮሞ አክራሪ ብሄርተኞች ነው	0
እዚህ ጋ ደግሞ የእነጃዋር እጅ ስለሚረዝም እነሱን ለማሳሰብ የታለመ ነው	0
ቅዱስ ቁርሀን ምን ማረግ እንዳለብን አኔዴት መስገድ እንዳለብን ስንተኛ ስንነሳ ስንበላ ስንጠጣ ሽንት ቤት ስንገባ ስንወጣ ምን ማለት እንዳለብን እንኳን ይነግረናል ቅደስ ቁርሀን በመሰረቱ የኢስላም እግ ነው እንዴት መኖር	0
እንዳለብን ያስረዳናል ሙስሊም ምን ማረግ ካለበት ቅዱስ ቁርሀንን መመልከት ብቻ ነዉ አበቃ	0
እግረመንገድህን ለዶናልድ ትራፕ ለምን አሜሪካ ውስጥ እንግሊዘኛ እያለ በአረብኛ አዛን ይደረጋል ብለ ንገረው	0
እነ ጃዋር የፈረንጅና የአረብ አምላኪወች ስለሆኑ ጥላቻቸው እንትናቸው የሚቆመውና የሚንጫጩት የፈረደበት ሚኒሊክ ነው ያመጣብን ብለው ስለሚያምኑ የራሳቸውን ማንነት እንደ ጠላት ስለሚያዩት ብቻ ነው	0
በአስተሳሰብ ራሱን ቀድሞ ዝቅ ካደርገ ማህበረሰብ ጋር አብሮ መኖርም ሆነ ስለ እውነት ማውራት ቀድሞም ቢሆን ሰውን ከእናት ማህፀን እንደገና ገብቶ እንዲወጣ ከማድረግ ባልተናነሰ ከባድ ነው ምስጢሩ ለገባው ብቻ	0
ደስ ሲል ከዚህ ሁሉ ሙስሊም አንድ ሀይማኖቱን የሚወድ ባለጌን የሚገስፅ እውነተኛ ሙስሊም አገኘው ተመስገን ነው ልቦናህን አይቀይረው	0
ራስን ችሎ መጓዝ ጥሩ ያከባብሰናል የኛ ቁርአን ውስጥ የሚዘለልአማኙ የማያውቀው ድብቅ ነገር የለም በአለም ላይ ባሉት ቋንቋወች ሁሉ ቢተረጎምልን ደስታውን አንችለውም በአገራችንም ሆነ በአለም ላይ ብዙሀን ህዝብ በሚናገሯቸው ቋንቋዎቾ ተተርጉማል ሁሉም በየራሱ ቋንቋ ያንብበው እንጂ የምናገኘው ሀይማኖታ ትምህርትና እውቀት ግን የሁላችንም አንድ አይነት ነው ኢስላም ግልፅና ግልፅ ነው ድብቅብ የለውም ማንኛውም የሰው ልጅ ሁሉ አንብብ እወቅ ነው የተባለው	0
እሺ መሲሉም ኦሮምያ አዛን በኦሮምኛ መብታቸው ነው መጀመርያ አንተ እነሱ ከመውቀስ መጀመርያ	0
የቤተ ክርስቲያን ቋንቋም ግእዝ ነበረ	0
ለምን ወደ አማርኛ ተቀየረ	0
መፅሀፍ ቅዱስ መጀመሪያ በእብራይስጥ ቋንቋ ነብር ከዛም ሁሉም በራሱ ቋንቋ ቀዳው በዚህም ምክንያት አንድ የኦርቶዶክስ እምነት በራሺንኛበግሪክኛበግብፅና ሶርያ ደግሞ በአረብኛ ይሰበካል የእምነቱ ባህሪ ስለሚፈቅድ በግእዝና አማርኛ ይሰበካል ስለዚህም ነው በአፋን ኦሮሞ እንስበክ የሚሉት	0
እስልምና ደግሞ ኢትዮጵያ ውስጥ የሚገኙ ቋንቋዎችን ጨምሮ በመላው አለም ላይ ባሉ ቋንቋዎችም እየተሰበከም ነውእንዲሁም በመላው አለም ደግሞ ሙስሊሞች ሰላትን በተመሳሳይ ቋንቋ በአንድ አቅጣጫ ለአንድ አላህ ይሰግዳሉእናም ምን ለማለት ነው በምትፈልገው ቋንቋ ቋንቋ ቋንቋ ቋንቋ እንዲሁም ቋንቋዎችን አላህ ይሰማል አ ይ መ ር ጥ ም	0
እስልምና ለዘረኝነት አይመችም እዛው ተፅፎል ዘረኝነት ጥብ ናት አተከተሎት የሚል አንቀፅ አለ ደሞ በኦረመኛ ዷዋ ቢደረግ ባትሰማውም ስዳመጥግ አጅር ታገኛለህ ችግር የለውም	0
ቁርሀን ምን ማረግ እንዳለብን አኔዴት መስገድ እንዳለብን ስንተኛ ስንነሳ ስንበላ ስንጠጣ ሽንት ቤት ስንገባ ስንወጣ ምን ማለት እንዳለብን እንኳን ይነግረናል ቅደስ ቁርሀን በመሰረቱ የኢስላም እግ ነው እንዴት መኖር እንዳለብን ያስረዳናል ሙስሊም ምን ማረግ ካለበት ቅዱስ ቁርሀንን መመልከት ብቻ ነዉ አበቃ	0
በኦሮመኛ በአማረኛም አይሆንም ይህ የማይቀየር ህግ ነውራሳችሁን ቻሉ የእኛ አንድ መሆን አይከንክናችሁ መመሪያችን አለም አቀፋዊ አንድ ስለሆነ ነውቅዳሴ በኦሮመኛ ይሁንልን ብለው የኦሮሞ ኦርቶዶክሶች መጠየቃቸው የኛ ጉዳይ አይደለም	0
እሱ የሙስሊሙ ፍላጎት ነዉ ፖፖስ ስናስመጣ የነበርንባት ግብፅ ቅዳሴየቸዉ በአረቢኛ መሆኑ አይታወቅ ይሆን	0
አፍሪካ ሀብረት ደብረ ምህረት የቅዱስ ሚካኤል ካቴድራል ሰንበት ትምህርት ቤት ባወጣው መግለጫ ላይ የሚከተለውን ተንኳሽ ቃል ተጠቅሟል	0
በእውኑ ባለቤት የሆነች ቅድመ ክርስቶስ በአምሳል ድሀረ ክርስቶስ በአካል የነበረች ቤተክርስቲያን የአንድ ጎልማሳ እድሜ ካስቆጠሩና በመልካም የሀገር እንግዳነት ከተቀበልናቸው ቤተ እምነቶች እኩል መታየት አለባት የሚል አመለካከት የተዛባ አመለካካት ነው	0
የማታ ሽንት ከመምጣቱ ማነካካቱ የባላል የማታ ሽንት አትሁኑ ኢስላም ለዬተኛውም ከሀዲ ከጎኑ አይቆምም ከባብሮ ተቻችሎ አብሮ ከመኖር ውጭ	0
ይህ ከአላዋቂዎች የሚመነጭ ጥያቄ ነው አዛን በኦሮሚኛ አይባልም ያለው ማን ነው	0
አላማው እኮ ነው የሚፈለገው የምስጋና ሰአት መድረሱን ማወጅ በአማርኛ በኦሮምኛ በትግርኛ ሊሆን ይችላል	0
የትርጉም ስራት ይጠይቃል እንጂ ከአምላክ ፈቃድ አጥቶ አይደለም	0
እስልምና በመላዉ አለም በአንድ ቋንቋ ነዉ የሚተገበረዉ ችግርም ካለ ጥያቄ ማንሳትም ሀነ መፍትሄ መስጠት የኦሮሞ ሙስሊሞች ጉዳይ ነዉ	0
ኦሮሞን ከፋፍለህ ልብህ ዉልቅ ብሎአል ሙከራህ አንድነት እንደሚያጠነክር እወቅ	0
ሀሀሀ አብረን እየኖርን አታውቁንም ማለት ነው እስልምና እንኳን በብሄር ቀርቶ ማርስ ላይም ሙስሊሞች ካሉ እንደኛው ነው ፋጣሪያቸውን የሚያወድሱት	0
ስለ ሙስሊም መብት ሙስሊም ይጠይቅ አንተ ሙስሊምን ወክለህ መጠየቅ አትችልም	0
ሙስሊም በቋንቋ የማገልገል ችግር የለበትም በአረብኛ በአማርኛና በአፋን ኦሮሞ በእኩል ደረጃ ይሰበካል የቁርአንና የሀዲስ ትትልቅ ይሰጣል ቁርአንና ሌሎች የእምነት መፅሀፍት ወደ አማርኛና አፋን ኦሮሞ ተተርጉሞ አገልግሎት እየተሰጠባቸዉ ነዉ ይህን ለማረጋገጥ ወደ ገጠርቱ ኢትዮጵያ ወረድ በል ከ በላይ የቲቪ ቻናሎች በአማርኛና በአፋን ኦሮሞ የስብከት አገልግሎት እየተሰጠ ነዉ ከዚህ በተረፈ ቀረ የሚባል ነገር ካለ የሀይማኖቱ ተከታይ ይጠይቅ	0
የሙስሊሙና የፕሮቴስታንቶቹ አብዛኛው ስርአቶቹ ትምህርቱ ብሎም አመራሩ አከባቢያዊ ከሆነ ቆይቷል ዳሴቷን ኦሮቶ ከሌሎች ህዝባዊያን አታወዳድሩ	0
አጣርታችሁ ስለማታውቁት እና ትክክለኛ መረጃ እና ግንዛቤ የሌላችሁን ጉዳዮች ፖስት አታድርጉ አስተያየትም አትስጡ ኡኡኡኡኡፍፍፍፍፍ ዝም ማለት እኮ አላዋቂነት አይደለም ከመናገራችን በፊት በምንናገረው ነገር እንደማንፀፀት እና የመረጃችንን እውነተኛነት እርግጠኛ መሆን አለብን	0
ኧረ እባካችሁን የራሳችሁን ችግር እራሳችሁን ችላችሁ ፍቱት እኛን ተዉን	0
ማነህ አንድ ሙስሊም ኢትዮጵያዊ ፊጂ ደሴቶች ውስጥ ያለ መስጂድ ቢገባ አዛኑን ያለ አስተርጓሚ ይሰማል ያለ አንዳች ልዩነት ከሀገሩ ሰዎች ጋር የህብረት ፀሎቱን ፈፅሞ ይወጣል	0
ሳኡዲም ጃፓንም ሴኔጋልም አርጀንቲናም ቢሄድ እንደዚያው ነው ለምን ይመስልሀል ተመራምረህ ድረስበት	0
አንተ በአንዲት ሀገር በአንድ ቋንቋ ሰበካ ለማድረግ ስትቸገር አዛን ግን በመላው አለም በ ሰአት ውስጥ በ ቋንቋ አዛን የማይሰማበት ባዶ ደቂቃ የለም የአላህ ተአምር ነው	0
ምን አይነቱ የጠጅ አስተሳሰብ ነውአዛን በአማርኛ ቢደረግ ኖሮ በኦሮምኛ ይደረግ ነበር ግን አልተደረገም ቄሱ ግን በአማርኛ እየሰበከ በኦሮምኛ ይከለከክላል በኦሮምኛ ቁርአንን እየተረጎመ ቢፅፍ ቢያስተምር የጁምአ ቁጥባ ንግግር ስብከት በኦሮምኛ ቢያደርግ ኢስላም ያበረታታል እንጂ አይከለክልም ኢስላም የሁሉም ብሄር ወይም የሰው ልጅ እንጂ የአማራና የንጉስ አይደለም እንደ ኦርቶ ገባህ ጠጆ ከኢስላም ጋር ልታወዳድር ቁሻሻን ከንፁህ ጠጅና አረቄን ከጁስና ከውሀ ጋር ልታወዳድር አረ እፈር ሼም	0
ከዚህ ሁሉ ድካም ወንጌል በወረደበት በነብያት ቋንቋ ታትሞ ቢሆንሰ በእብራሰት ወይም በሂብሩን ቋንቋ መከፋፈል አይመጣባችሁሞ ነበር	0
አዛን ደግሞ በኢትዮጵያ ብቻ ሳይሆ በመላው አለም በአረብኛ ብቻ ነው የእስልምና እምነት ትምህርት እኮ ኦሮሚያ ውስጥ በኦሮምኛ አማራላይ በአማርኛ ትግራይ ውስጥ በትግርኛ እንደሚሰጥ አታውቅም እንዴት ለማንኛውም እምነት ከብሄር ይበልጣል	0
ለወደፊት ምናልባት ይጠየቅ ይሆናል ጥያቄው መልካም ሆኖ ሳለ መፍትሄው ግን ችግሩን አይፈታም የኦርቶዶክስ ቤተ ክርቲያን በሁሉም ቋንቋ ተናጋሪዎች ይመለካል	0
ስርአተ ቅዳሴው በግእዝ ነው ግእዝ የሚናገር ብሄር የለም ስለዚ መዝሙር በኦሮምኛ አለ መፅሀፍ ቅዱስም በኦሮምኛ አለ ኦሮምኛ ተናጋሪ ሰባክያንም አሉ ከዚህ በላይ መኖር ይኖርበታል ከኢትዮጵያ ኦርቶዶክስ ውጪ ግን የኦሮሚያ ኦርቶዶክስ ማለቱ ከሀይማኖት ይልቅ ፖለቲካዊ ጥያቄ ያዘለ ነው	0
ሙስሊሞችኮ አለም አቀፍ እንጅ አማራ አቀፍ ሀይማኖት የላቸውም	0
የቻልከዉን ምታ ቢሉት ወደ ሚስቱ ሮጠ አሉ ምነዉ ነገርህ ሁሉ አህያውን ፈርቶ ዳውላውን ሆነብኝሳ	0
ሁሉም የራሱ እምነት አለዉ አደል ከፈጣሪ ትዛዝ መዉጣት እንችላለን ነገን አይተህዉ ታቃለህ	0
ወደፊትስ ያለዉን አይተህ ታወራናለህ ሁላችንም ለአምላካችን ምስጋና ማቅረብ መፀለይ ነዉ አደልእስካሁን ድረስ በአፍ መፍቻ ቋንቋ ይደረግልን ብለን እናቃለን	0
በማያገባህ አትዘፈቅ ደግሞም መቼም ሊሆን አይችልም ህልመኛው	0
እረ ምን ይሻለናል ምንድረ ደብተራ አህያውን ሲያቅተው ዳውላውን ጥያቄውን መመለስ ሲያቅታችሁ ጭራሽ አፋችሁን በሙስሊሙ ላይ መክፈት ምን እሚሉት ቅዤት ነው	0
ደግሞ አማርኛ የማይሰሙ ኦሮሞ ምእመናን ካሉ ተከታዮች መስማት ተስኗቸውፐምቾት አላጡምለእምነቱስ መስፋፋት ማነቆ አልሆነምእበጣምየዘገየ ጥያቄይመቻችላቸው ከፈጣሪያቸው እንደልብ ይገናኙ	0
እስልምና ደግሞ ኢትዮጵያ ውስጥ የሚገኙ ቋንቋዎችን ጨምሮ በመላው አለም ላይ ባሉ ቋንቋዎችም እየተሰበከም ነው	0
እንዲሁም በመላው አለም ደግሞ ሙስሊሞች ሰላትን በተመሳሳይ ቋንቋ በአንድ አቅጣጫ ለአንድ አላህ ይሰግዳሉእናም ምን ለማለት ነው በምትፈልገው ቋንቋ ቋንቋ ቋንቋ ቋንቋ እንዲሁም ቋንቋዎችን አላህ ይሰማል አ ይ መ ር ጥ ም	0
ከሙስሊሙ ራስ ላይ ወርዳችሁ በሽታችሁን እዚያው ለምን አታክሙም ወይስ በሽታችሁ የማይድን ነው	0
የራሷ አሮባት የሰው ታማስላለች ሆንክብን የት ሀገር ነው አዛን በአማርኛ ወይ በሌላ ቋንቋ የተጠቀሙት ጥግህን ያዝ ያልበላክን አትክክ	0
እነሱ ለእምነት አዝነው ተቆርቁርው ሳይሆን እምነት የማጥፋት ተልኮ ስላላቸው ነው	0
የኛዎቹ እነ ቀሲስ በላይ ይህን ጥያቄ አያነሱም በሜንጫ አንገቱን ይቆረጣላ	0
ይሆናል አሁንም መተርጎም ነው ምን ችግር አለው	0
ጥንቆላ እና ድግምት መፅሀፍት በግብፁ ኮብቲክ በራሻው በእስራኤል ቤከርስቲያን የለምስለዚህ ይህን በኦሮምያ አናስተምርም ይህን ጥያቄ መልሱ	0
ራሷን ንግስተ ነገስት ዘኢትዮጵያ በሚል የምትጠራው እህተ ሰይጣን ዛሬ ማምሻውን በፖሊስ ቁጥጥር ስር ውላለች	0
ግለስቧ የአስቸኳይ ግዜ አዋጁን በሚፃረር መንገድ በእምነት ስም እስከ አንድ መቶ የሚደርሱ ተከታዮችን ሰብስባ በመገኘቷ ነው ተብሏል	0
ወገኖቸ እንደዚህም ጥሩ አይደለም አትፍረድ ይፈረድብሀል ይላል ቃሉ በተለያየ መንገድ ማንም ሰው ወደ ጥፋት ሊሄድ ይችላል የክርስትና ምግባሩ ግን ወደልቡናው እንደመለስ መፀለይ እንጅ ፈራጅ መሆን የክርስቲያን ምግባሩ አይደለም የነክርስቶስ ሰምራ ተከታዬች አይደለን እናታችን ክርስቶስ ሰምራ እኮ ሰይጣንን ማርልኝ ብላ የፀለየች እናት ነች እኛ ታዲያ ምነው ለራሳችን ለሰው ልጅ እንደመፀለይ ነቃፊ ብቻ ሆንሳ ግን ስራዋ ጥሩ ነው ለማለት ፈልጊ አይደለም	0
ሀሰተኛ ነብያትን ከዚህ የዋህ ህዝቤ ጫንቃ ላይ አንተ በራስህ እውቀት ማወናበጃቸውን ግፈፍልን አንዳች ጠብ የምትል ቁም ነገር አላየንባቸውም መጨረሻቸውን_አቅርብልን	0
ይብላኝ ለአንተ እና ለመሰሎችህ እንዲሁም ለመንጋ ተከታዮቻችሁ እውነትን በሀሰት ክስ ለማስቆም ከአውሬው መንግስት ጋ ተባብራችሁ ለተሰለፋችሁ በሙሉ በትእቢት ልትጠፋ ወደ ጥልቅ ባህር እየሰጠማቹህ እንደሆን ከፈሮኦን ታሪክ ብትማሩ መልካም ነበር	0
ከኦሮሞ ባለሰልጣኖች እሷ የሰራቸው ወንጀል የለም ሰንት እጃቸው በደም የተጨማለቀ ምንም ሳይባሉ እንዴት እሷጓ ብቻ ትያዛለች ፍርድ እኩል ይሰጥ	0
እኔ የዚች አለም ጉዳይ እስካልገባኝ ድረስ በንግስት ባይዋም ይሁን ንጉስ ነኝ ባዩ ቅንጣት ታህል ሀሳብ ለመውቀስ የለኝም የምታሮጡት እናንተው የምታመጡት እናንተው ማንንም አልሰማም ፍርድ ከማምነው ከፈጠረኝ አምላኬ ሲመጣ ብቻ ነው ስለ አለም ሰዎች አልሰማም	0
እያንዳንድሽ ዋጋ ለመክፈል ተዘጋጅ ዝምብሎ መፈንጠዝ ሁልጊዜ አይገኝም	0
ማነህወዳጃችንምናልባት እኛ በተረዳንህ ስሜት ካልተሰላሰልን እውነትም አልተግባባንም ማለለት ነውበልኬታህ አንፃር እንኳንማህበርተኞች ከሚለፍፉት ለፈፋ ኢትዮጲያ ውስጥ እንኳን ተፈጥሮ ባጋጣሚ የተገኘ በሚተርፍበት ቅፅበት በተዘዋዋሪ ለቆረናቀረናየሴት ነብይየስብሰባ ቀመርወዘተረፈ እውቅና ሰጠህትላንትናና ዛሬስ በገነት እንብርት አቅራቢያ የተኮለኮለው ተሰብሳቢና ምንተታቸው ዋጋ እያስከፈለ ሳለ ደነቆሩግና ሚስጢራዊው ማህበር እንደ እንሽላሊት ወደቡ ተቆርጦ ሳለ በአውሬው መፈራገጥ ውስጥ ደመ ነፍስ ያለው ለስብሰባ ቸኮለ	0
ታዴየእግዚእትነ ማርያምን የአለም ገጂነት ለመቀበል እንጎምጂ እንጂ ስለ ኮረና አናቀንቅን	0
መንግስት እማ አንጀቴን ነው ያራሰው የጠንቋይ አጫፋሪዎች ወራዶች ሁላችሁንሞ ከነ እመቤታችሁ ወደቂልጦ መላክ ነው እንጅ የህግ የበላይነት እንደዚህ ነው ብራቦ ፓሊስ አጀቴን አራስከው ዲሞክራሲ መቀለጃ ሆነ እሷ ብሎ ንግስት ሞአ አንበሳን ከ አመት በሗላ ጥሩ ትውስታ ነው የነገሰችበትን ወንበር አይቼ ነው ምንታድርግ ከታምራት ኮርጃ ነው የሱ ተከታይ ትሆናለች ሞኝ ህዝብ በየዘመናቱ የሌባ ሲሳይ ታምራት ስንት እህቶቻችንን ገንዘብና ህይወይት ቀማን ህዝቡ አይነቃም እንዴ መንግስት የምርመራ ውጤት እና ውሳኔ በየሚድያው ለህዝብ ማሳወቅ አለበት	0
ምክንያቱ ይህ ብቻ ከሆነ ነገ ትፈታለች በሀይማኖት ጣልቃ በመግባትና በማበጣበጥ አንዲሁም በመንግስት ላይ ሌላ መንግስት በመቀባት በተጨማሪ በግለሰቦች ላይ ጉዳት በማድረስ	0
ይሄ ደግሞ ለማድረግ ይሄን ያህል ሰአት ፈጀብህ ፔጆች ላይ ከተፖሰተ በሗላ ትፖስታለህ እንዴ	0
ዋው በእውነት ደስ ይላል ዘመድኩን በቀለ ዘመዴን አለማድነቅ አይቻልም ይህ ሁሉ የሱ ውጤት ነው እመብረሀን ትጠብቅህ ዘመዴ	0
አስቸኳይ ጊዜ አዋጁን በመተላለፍ እና ሀሰተኛ ትምህርት ስታስተምር እንዲሁም ስታጭበረብር በመረጃ ስለተደረሰባት ታሰረች ቢባል መልካም ነበር	0
ይች ሴትእኮ ኮረና ባይመጣም በብዙ ምክንያት እረፊ መባል የነበረባት ነበረች	0
እንደ አንተ አይነቱ ደደብ ባለበት ሀገር እንድ ንፁህ ሰው ቢታሰር ምንም አይገርምም ረጅም እድሜ ለንግስተ ነገስት እህተ ማርያም ዘኢትዮፅያ ታስሮ የቀረ የለም ትርፋ ትዝብት ይሆናል ሲቀጥል ጨው አይደለችም አትሟሟም አንተ ፈሪ እንደሷ እስኪ ራስክን አገልጥ ባታምን እንኳን እሷን ለድፍረቶ እና ጀግንነቶ አርያ ልታደርጋት ትችል ነበር	0
ንጉስ እና ንግስት የማይከበርባት ሀገር የታሰሩት ነገስታቱን በዙፋናቸዉ ለማቆየት ሲባል ነው ሰባተኛው ንጉስ ስምንተኛው ንግስናቸዉን ለማቆየት አስረዋቸዋል ዘጠነኛው ንጉስ እኔ ነኝ ካሁኑ ልንገራችሁ	0
አይ እህተ ማሪያም በእለተ ቀኗ ወደ ማረፊያ የቀን ግጥምጥሞሹ የጉድ ነው	0
እግዚአብሄር ይመስገን የአንተና የመምህር ዘመዴን ጩኸት ፈጣሪ ሰምቷልና ስሙ ይባረክ ሌላው ደግሞ ሊታሰብበት የሚገባው መንግስት በአዲስ አበባ ነባር ቅርሶች እና የተዋህዶ ቦታወችን ወረራ ላይ ነውና አሁንም ጩኸት ያስፈልጋል ወንድሜ ታዴ	0
የማዝነዉ ሰዉ ከአጭበርባሪዉ ታምራት ገለታ ስራ መማር አለመቻሉ ነዉ እች የሰይጣን ፈረስ እስከ ዛሬ ስንቱ ወደ ተሳሳተ መንገድ እየመራች ገደል እንደከተተችዉ ፈጣሪ ነዉ የሚያዉቀዉ በእምነት ነፃነት ስም የዜጎችን ደህንነት አደጋ ላይ የሚጥሉትን በህግ መጠየቅ ጊዜ የሚሰጠዉ አይደለምና እህተ ሰይጣንን ቢረፍድም ወደ ሚገባት ገቢ መደረጓ ጥሩ ነዉ	0
መነሻና መዳረሻ የሌለው ጉዞ ውጤቱ ይህ ነው ቻው መናይቱ	0
ካንተ እምነት ውጭ ያለን ሰው ሁሉ ሰይጣን ማለትህ ያረጀ ያፈጀ አስተሳሰብ ባለቤት ያደርግሀል	0
የፈለገችውን እምነት መከተል መብቷ መሰለኝ	0
እዩኝ እዩኝ ሲሉ ደብቁኝ ይመጣል ማለት ይህ ነው	0
የእውነት አምላክ÷ የኦርቶዶክስ ተዋህዶ አምላክ የእመቤታችን የቅድስት ድንግል ማርያም ልጅ አይተኛም ገና ብዙና የበዙ ሀሳዊ መሲዎች ሲዋረዱ እናያለን	0
ዶአብይ እናቴ እንደዚህ ብላኛለች ብሎ ጀመረው ተከታዮቹም እየቀባጠሩ ነው መሪን መምሰል ግን እንደዚህ አይደለም	0
ድሮስ በሷ ነበር እንዴ የሚኖሩት በፈጣሪ ፀጋ እንጂ ስለዚህ እንኳንም ተቆፈደደች እንጂ እነሱ በፈጣሪ ይኖራሉ ያውም በፀፀት ወደ ንስሀ ተመልሰው	0
ከ አዋጁ በተጨማሪ ሲኖዶሱ በራሱ ክስ አዘጋጅቶ ሊከሳት ይገባል በምትሰራው ማጭበርበር	0
ታዴ እንዴት ነህ ይች ሴትዮ ይገባታል የነ አባዮሀንስ ነገር እያሳሰበን ስለሆ አንተ ጋ ስለ ሀይማኖታችን ሰውየው ትክክል ናቸው ወይስ ስህተት ናቸው	0
ይችን እብድ በቁጥጥር ስር ያዋለ የአባቶቻችን አምላክ ይክበር ይመስገን የዚች ከይሲ ተላላኪ ተከታይ የሆኑትንም በማጋለጥ ተባበሩ	0
ዘውዱስቅርስ ጥናት እና ጥበቃ ሚኒስቴር በጥንቃቄ ያስቀምጥልን	0
ምንድንነው ነገሩ ንጉስ ነኝ ንግስት ነኝ ነብይ ነኝ ልፀልይላችሁ ጌታ ነገረኝ ኮሮናን በእጀ ስይዘው ብን ብሎ ጠፋ ቅብጥሴ ምንትሴ የሚሉ ሰዎች ግን የአለም ፍፃሜ ምልክቶች ይመስሏኛል	0
የሶን ቪዲዮ በብዛት ማየት ከጀመርኩ በሀላ ፀሎት ስግደት ቀድሞ ቅዳሴ መግባት መንበርከክ አብዝቻለሁ ምን አድርጋብኝ ይሆን ባካችሁ	0
በጣም ከታዘብኩት ነገር የእሷን ደጋፊዎች ፕሮቫይል ገብቼ ስመለከት ጠቅላላ ማለት ይቻላል በሴትየዋ እንደምያምኑ ያሳያል	0
በእውነት እግዚአብሄር ልባችሁን ያብራላችሁ	0
አሁን ገበነዋ በደንብ መውጣት አለበት መታሰሯ በስብሰባው ብቻ መሆን የለበትም	0
አመፍርስስ ምን እየሰሩነው ዶር ትክክለኛ ፍትህ የታየ ዛሬነው ይህች አጭበርባሪ ቦታዋን አገኘች ገንዘቧን እየሰበሰበች ምስኪኖች እያታለለች የምታጭበረብር ሌባነች እንዳትለቀቅ አደራ አደራ አደራ	0
ዘመዴ ላይጨርስ አይጀምር እሱ የነካው ነገር እንዲ መስመር ይይዛል አቦ ፈጣሪ እድሜ ይስጠው	0
ዘመድኩን በቀለ ላይጨርስ አይጀምርም	0
የአማራን ነገስታት ክብር ለመንካት	0
ስትፈታ ደግምም ትንቢቱ ይፈፀም ዘንድ ግድ ስለሆነ ነው ትለናለች	0
እነሱማ ምን ይሄናሉ አማራጭ ሲያጡ ርትእትን ትተው ወደ ኦርቶዶክስ ተዋህዶ ይመጣሉ ቅድስት ቤተክርስቲያናችን እንደሄነች ልጆቿን አትተውም ትሰበስባቸዋለች ይብላኝላት ለስዱ አዬ ጉዷ	0
በያንዳዱ ደምረው መቶ አመት ይፍረዱባት	0
ትፈታለች አይዞህ ደስ አይበልህ ምክንያቱም ዜግነቷ የሌላ አገር ነው	0
ክክክ ግን በትሯን ይዛ ነው የሄደችው ወይ አለመሳቅ አይቻልም	0
ቀደምት የአማራ ስልጣኔ አሁንም በአርኪዮሎጅስቶች ቁፋሮ ተገኝቷል ይህ በአለም ላይ በወቅቱ ከነበሩት ሀያላን ኢምፓየሮች አንዱ የሆነዉ አሁን ትግራይ ተብሎ በሚጠራዉ አካባቢ ሰሞኑን በአጥኝዎች የተገኘ ነዉ	0
ይህ ግኝት የአማረኛ ቋንቋ ቀደምትነትም ያረጋገጠ ነዉ አሻራችን ያላረፈበት ስልጣኔ የለም	0
ለምን ታዲያ አሁን ትግራይ አሻራ የለህም ለምንስ እዛ አልተገኘህም ምን አባረረህ መቼም ጌታ ባሪያውን አያባርርም ቅቅቅቅቅቅቅቅቅቅ እስኪ መጀመሪያ ማንነትህን ፈልግ አገው ነህ ቅማንት ነህ ሽናሻ ነህ ወይጦ ነህ ዘረ ቢስ የሌላውን ታሪክ የሚሰርቅ የማንነት ቀውስ እና የታሪክ ድርቅ ያለው ነው የራሳችሁን ታሪክ ስሩ	0
እየዞራችሁ እንደእርጉዝ ሁሉ ከሚያምራችሁ ከአሁን በኋላም ታሪክ መስራት ይቻላል	0
ፀሀይ አበራ አትበሳጭ እዉነቱንማ ተቀበል	0
አገዉ ሽናሻ ወይጦ አማራ ናቸዉ አማራም እነሱን ነዉ አንድ ናቸዉ ቅማንት የምትለዉም የአማራ ወድሞች ናቸዉ ምንም እንኳን ከግብፅ ቢመጡም ለምን የተዋለዱት ከአማራዉ ጋር እንጅ ከትግሬ ጋር አደለም መቼም ከግብፅ ሲመጡ ሴቶችም ነበሩ አትለኝም ስለዚህ ቅማት እራሱ አማራ ነዉ ያዉ እንግዲህ ትግሬ ደሞ የመጣዉ ከየመን ለስራ ነዉ በናንተ ሀጢአት ትግሬ ተረገመች እደምታየዉ ዛሬም ድረስ ሀጢአት ከመስራት አልወጣችሁም ትግራይም በዲጋይና በግብረሰድማዊያን ተጥለቀለቀች አሁን ጥያቄዉ በዛዉ በተረገመችዉ ትግራይ ላለዬ ላለይ ማለት ይቻላል ወልቃይትን እና እራያን ለቃችሁ ተሎ ዉጡ ከዚህ ዉጭ አማራ ከናንተ የሚፈልገዉ ነገር የለም	0
አማራ ከ ሁሉም ብሄር ተሰባስቦ ልክ እንደ ለማኝ እህል ተጠራቅሞ የመሰረትዋት ሲሆን አሁን አማረ ከሚል የመጣ ቃል ነው እንጂ አማራ የሚባል ብሄር የለም	0
ወይይይይይ ወየው እስኪ ተወኝ	0
አንች ግን የመናዊ ነሽ እረፊው	0
ጠያቂ – የጥንት አማራዎች መኖሪያ የት ነበር	0
ፐሮፌሰር – የጥንት አማራዎች የዮቶር ልጆች ናቸው ዮቶር የዛሬ አመት ቤጌምድር የሚኖር በግ አርቢ ነው ለንግድ እና ለተለያዩ ተግባራት ወደ ባህሩ በመጠጋት መንግስታቸውን መሰረቱ	0
ይህም የደ አማት ዘ አማራ	0
መንግስት ነው የመጀመሪያው ንጉሳቸውም አክናሁስ ይባላል	0
የግዛታቸው ድንበር እጅግ ሰፊ እየሆነ ሲመጣ የንጉሱ መጠሪያ የአገር ሹም አግ ሹም አክ ሹም በጊዜ ሂደት አክሱም ይባል ነበር	0
ንጉሱ በዚህ ስም መጠራት የጀመሩት ክርስቶስ ሊወለድ አመት ሲቀረው ነው ስለዚህ ከ ሰሜን ቀይባህር እስከ በናዲር የአሁኑ ሞቃዲሾ የእነሱ ግዛት እንደነበር የታወቀ ነው	0
የ አሁኖቹ ትግሬዎች ታዲያ ከየት መጡ	0
ፕሮፌሰር – ምን ሆነ መሰለህ ፈገግ ብለው እያሰቡ እነዚህ የጥንት አማራ ነገስታት አክሱም ላይ ሆነው ጠንካራ ንግድ ከፋርሶች እና ከጥንት ቻይናዎች ጋር መሰረቱ	0
በአካባቢው ለሚሰሩ ግንባታዎች ለቀን ሰራተኝነት እና የቤት ውስጥ ታዛዥ እና አገልጋይ ለመሆን ከተለያዩ ሀገራት ሰዎች ይመጡ ነበር	0
ዋናው መምጫቸው ደግሞ ከሰሜን የመን ነበር እነዚህ ከተለያየ ቦታ መጥተው አክሱም የተለያዩ የቀን ስራ የሚሰሩት በሙሉ የአገሬው ሰው የሚጠራቸው	0
ትግሬ እያለ ነበር ያን ጊዜ ትግሬ የብሄር ስም ሳይሆን የስራ ስም ነው ያኔ ትግሬ ማለት አገልጋይ ማለት ነበር	0
ፕሮፌሰር ለዚህ ለተናገሩት ነገር ምን ማስረጃ አለዎት	0
ይህ ታሪክ በሳይንሳዊ መንገድ ተጠንቶ የተደረሰበት ነው	0
አብዛሀኛው ትግሬዎች የግንበኝነት ስራ መውደዳቸው	0
አክሱም ላይ ባሉት ሀውልቶች እና ቤተመንግስታት ትግሬነትን የሚያሳይ	0
ምንም አይነት የፅሁፍም ሆነ የቅርፃቅርፅ መረጃ አለመኖሩ	0
ያኔ ምግብ በመሶብወርቅ ለአሰሪዎቻቸዉ አቅርበው ክዳኑን ይዘው ወደ ማጀት ሲመለሱ በአሁኑ ጭፈራቸው ላይ መንፀባረቁ ይሄውም የ መሶበወርቅ ክዳን ይዞ በአንድ እግር እየዘለሉ መጨፈር	0
ከነሱ በፊት በመጡት ፈላሾች በመገፋታቸዉ አክሱም ላይ ብቻ መወሰናቸው	0
ከሰሜን የመን ይዘውት የመጡት ሳባዊ ቛንቛ በግእዝ ተፅእኖ ምክንያት የአገልጋዮቸ ቛንቛ ወይም አሁን ትግርኛ መፈጠሩ	0
ትግሬ የሚለው ቃል በራሱ ትርጉሙ አገልጋይ ማለት መሆኑ እና ስራቸውም አማራን ማገልገል ነበር	0
ጠያቂ – ስለዚህ የትግሬዎች ወደ አክሹም መምጣት ልክ አሁን ወደ አረብ ሀገር ለስራ እንደመሄድ ያለ ነው	0
ፕሮፌሰር – አዎ ልክ እንደዛ ነው እንደውም ከዛ ይበልጣል ልክ በ አሜሪካ በመሄዳቸው እንደሚደሰቱ ሰዎች እንደማለት ነበር	0
ታዲያ ምን ተፈጥሮ ነው አማራዎች ከአክሱም የጠፉት	0
ፕሮፌሰር – እየውልህ ያን ሰፊ ግዛት በጥሩ ሁኔታ ለማስተዳደር ሲሉ አንዱ አክሱም ላይ አንዱ ደግሞ ኤረር ላይ ነገሱ ይህም በ አም ነበር	0
ኤረር ማለት የአሁኗ አዲስ አበባ ዙሪያ ማለት ነው ክርስትና እውቅና ያለው ሀይማኖት በመሆኑ የተበሳጩት ፈላሻዎች ጥሩ ቀን ይጠብቁ ነበር ይህንንም በ አም አገኙት በበቂ ሁኔታ ያልተዘጋጀዉን የአክሱሙን መንግስት	0
አሸነፉት የኤረሩን መንግስት ለመውጋት ወደዚያው ዘመቱ ግን ፈላሾቹ መርሀቤቴ በተደረገው ጦርነት አለቁ ከ አመት ጦርነት በሗላ ፈላሾች ውድመት ብቻ አተረፉ ተሰደው የመጡት የ አክሱም አማራ ነገስታትም እዚያው ኤረር ሆነው ቦታውን ማስተዳድር ቀጠሉ ገሚሶቹም ላስታ ላይ አስተዳዳሪዎች ሆኑ	0
ታዲያ ለምን እውነቱን አታስተምሩንም	0
ፕሮፌሰር – የዝምታው ምክንያት ሌሎች የአማራ ምሁራን ናቸው	0
ዝምብለዉ ሰላም ያደፈርሳል ይላሉ ይህ ግን እውነተኛ ታሪክ ነው በሀሰት የሚፈጠር ሰላም ዘላቂ አይደለም	0
ዝም በይ እነ አቦይ	0
ስብሀቱ ይስቁብሻል	0
ዳአማትም አክሱምም የጥን አማሮች ስልጣኔ መንግስት ነው ታሪክ አንብቡ ግን እህል ከቀመሳችሁ አመት ሆነ ያ ደፂ ደግሞ በረሀብ እያጣጣረ ነው አሉ ነፍሱ ወጣ ገና ነው	0
የተገኘው ፊደል የግእዝና የትግርኛ ፊደል ነው አማራ ማለት አዲስአበባ ኬኛ ወይልቃይት ኬኛ አኩሱም ኬኛ የምትሉ በምኞት የምትኖሩ ርካሽ ህዝቦች ናቹ እኔ ብፈልግ ከአኩሱማውያን እደሆነዘሬ እስከ ትውልድ እፅፍልህ ነበር	0
ቀጥ ብለህ ሀገርክን ፈልግ ሌባ	0
ሰበ ሆራኦራ ፊደል ስለሆነ በቀላሉ መስረቅ የምትችሉ አይመስለኝም ለማንኛውም የሚገርም ኩሻዊ ሄሮግሎፊክ ፅሁፍ መሆኑን አትሳት	0
ያንተን ትርጉም ላንተው ትተን እውነተኛውን ታሪካዊ ትንተና ለመስኩ ምሁራን	0
አውቀህ ሞተሀል ኑቢያ እና ኩሽን ምን ለየው ቶባ ናፕታ ሜሮእኑቢያ ዳአማት ላሊበላ እና አኩሱም የኩሽ ስልጣኔ ተቀጥያዎች ናቸው	0
ሚኪ እናመስግናለን እውነት_ትደበቃለች_እንጂ_አትጠፋም ስልጣኔውም ሆነ ፊደሉ የማን እንደሆነ አለም ያቀዋል በርታ	0
የታወቀ ነው አማርኛ የጥንት ቆንቆ ለመሆኑ የወታደር ቆንቆ ብላ ብላ ሳይሆን	0
ሀሀ ይህ ስልጡን ህዝብ ጎዣምና ጎንደር ስሄድ ስልጣኔው በሆነ መንፈስ ተቀማና ክስልጣኔ ውጭ ሆነ	0
ድንጋይና ድንጋይ አገናጅቶ ቤት መስራት አቅቶት ዛፍና ሳር ውስጥ ኖረ	0
ደግሞ ድንጋይ ላይ መፃፍ አቅቶት ከፅሁፍ እውቀት ነፃ ሆነ	0
አረ እንደውም ራሱ የፈጠራቸው ፊደላት ልምሳሌ ሀ ኀ ሀ ኸ ምንምን ድምፅ እንደሚወክሉ ረስቶ ሁሉምበአንድ ድምፅ ስር ከተታቸውቡዙ ቡዙ	0
እንዲህ ብለህ ለመሞገት አሁን የተወሰነ የአማራ ህዝብ ትግራዋይ ነው አኽሱም ነበረ በተለይያዩ ምክንያቶች ወደ ጎንደር ጎዣምና ሸዋ ሄደ	0
ከዛም እዛ ከነበሩ ቅማንት አገው ቤጃ ጋፋትና ሌሎች ተጋብቶ ቋንቋው ረስቶ አዲሱ የተወለደውን አምሀርኛ ተናጋሪ ሆነ የሚለውን ሀቅ መቀበል አለብህ ሚኪ	0
እውነት እንነጋገር ኢትዮጵያውያን	0
እነማን ናቸው የጥንት ስሟ	0
ማን ነው ሀበሻስ ማን ነው	0
በሙሉ ግእዝ ናቸው ጌታው በድንጋይ የተፃፉትን ቃላት ሙሉ በሙሉ ግእዝ ስለመሆናቸው ለማረጋገጥ ከፈለጉ ታላቁ የግእዝ መዝገበ ቃላት ወደሚገኝበት ወደ ብሄራዊ ቤተመዘክር ብቅ ይበሉ አድራሻ ከኢቲቪ ህንፃ ጀርባ	0
እናንተ እኮ አማርኛ ከትግርኛ የመጣ ነው የምትሉ ፍጡሮች ናችሁ እኮ አማርኛ ከትግርኛ በፊት ከግእዝ የመጣ ነው አክሱም ደግሞ የአምሀራ ስልጣኔ ነው	0
መርሀ ቤቴ ነፍጠኛ እስኪ የራሳችሁን ታሪክ ስሩ በእናታችሁ ደግሞ የትግራይ ነው የሚያምራችሁ መቼ ይሆን እርግዝናችሁን ምትገላገሉት	0
አሁን ደግሞ ይሄ አማራችሁ የእናተ አምሮት አያልቅም	0
አይይይ የእናተ ነገር ሁሉ አማራሽ አይ እነ ሁሉ የእኛ በሉ ለአምሮታችሁ ተመዩ ግን መሆን አይቻልም የተፈጥሮ ጉዳይ ነው ምንም ማድረግ አይቻልም	0
መርሀ ቤቴ ነፍጠኛ በግእዙ መዝገበ ቃላት አማራ ትግሬ አማርኛ ትግርኛ ወዘተ የሚሉ ቃላት የሉም	0
ባልነበሩ ቃላት የአማራና ትግሬ ሊህቃን ክርክር ያስቃልለማንኛውም ብቅ ይበሉና መዝገበ ቃላቱን ያንብቡ መልካም ጊዜ	0
ግድ የለም ጌታው ይምጡና መዝገበ ቃላቱን ያገላብጡ	0
እዝም ቢሆን ትግሬን ምን አገባው	0
ደስ የሚለው ደግሞ ብአዴን ታሪካችንን ቀጣይነት እንዲኖረው ይኸው አመታትን ሙሉ ያለ እረፍት መስራቱ ነው አያ ሚኪ	0
እንካን አማርኛ እና ትግርኛም የራሱ ፊደል የለውም	0
ይህ የተረጋጋጠ እውነት ነው አክሱምን ፈልፍሎ የሰራ ድንቅ ህዝብ አንዳንድ ኢትዮጵያዊን ባይቀበሎትም እውነቱ ግን አይቀርም	0
ሚኪ የሚጮሁ ይጮሀሉ አማራ በማስረጃ ጉዞውን ይቀጥላል ያለመመጣጠን ችግር ይታያል አንድ የሚያደርገን ብዙ ነገሮች ቢኖሩም የፈለጉት ግን አይመስሉም ይህ ነገር የሁላችንም ነው ስንላቸው አይ የእከሌ ብቻነው ይላሉ የእከሌ ብቻነው ሲባሉ ደግሞ በምቀኝነት ይነሳሉ አሁን መፍትሄው ለሚጮሁት ጩኸን አንዘልቅም ስልጣኔ ለእኛ ብርቅ አይደለም ለሌሎች እንጂ እኛ ብዙ የተጠመዱ የስልጣኔ ወጥመዶች አሉን እነሱን ማስፈንጠር ብቻ ነው የሚጠበቅብን እኛ መኖር የምንችለው በራሳችን እውቀትና በችሎታችን ነው የራሳቸውን ጨምረው አብረው ከተጓዙ ችግር የለውም የሚጨምሩት ከሌላቸውም አሁንም ችግር የለውም የሚጎትቱንን ግን መተው ያስፈልጋል	0
እስኪ የራሳችሁን ታሪክ ስሩ በእናታችሁ ደግሞ የትግራይ ነው የሚያምራችሁ መቸ ነው እርግዝናችሁን ምትገላገሉት	0
አሁን ደግሞ ይሄ አማራችሁ የእናተ አምሮት አያልቅምአይይይ የእናተ ነገር ሁሉ አማራሽ አይ እነ ሁሉ የእኛ በሉ ለአምሮታችሁ ተመዩ ግን መሆን አይቻልም የተፈጥሮ ጉዳይ ነው ምንም ማድረግ አይቻልም	0
እስኪ የራሳችሁን ታሪክ ስሩ በእናታችሁ	0
ደግሞ የትግራይ ነው የሚያምራችሁ መቼ ይሆን እርግዝናችሁን ምትገላገሉት አሁን ደግሞ ይሄ አማራችሁ የእናተ አምሮት አያልቅምአይይይ የእናተ ነገር ሁሉ አማራሽ	0
አይ እነ ሁሉ የእኛ በሉ ለአምሮታችሁ ተመዩ ግን መሆን አይቻልም የተፈጥሮ ጉዳይ ነው ምንም ማድረግ አይቻልም	0
ደግሞ ግእዝ እና አማርኛን ለዩ ይህ በግእዝ ነው የተፃፈው እራሱ ፊደሉ ብቻ ሳይሆን ፅሁፉም ግእዝ ነው	0
አማርኛ ሲጀመር ፊደል የለውም ፊደሉ የግእዝ ነው ሲቀጥል አማርኛ በኛው ክፍለ ዘመን የአገው ወታደሮች ክርስትናን ሲቀበሉ አምሀራ ይሏቸው ነበር ይኽው ነው	0
የአገው ክርስትያኖች ማለት ነው እና የአክሱም ነገስታት ለአገልጋዬቻቸው ያስተማሩት ቋንቋ ነው	0
አገልጋዬቻቸው ከተለያየ ስፍራ ስለሚመጡ አንድ የጋራ መግባቢያ እንዲኖራቸው ተብሎ የፈጠሩላቸው ቋንቋ ነው እንጅ አማራ የሚባል የሚባል ብሄር የለም	0
ችግር የለውም እናንተ ማለት እኛ ማለት ነን የናንተ ነገር ብዙ አያስቸግርም ከጦርነት አያልፍም እኛ ደግሞ በጭራሽ ጦርነት አንፈልግም ያለፈበት ፋሽን ነው በዛ ላይ ኤርትራ ጋር ያደረግንው የተሳሳተ ጦርነት እየቆጨን እንዴት ከእናንተ ጋር በጭራሽ አናደርገውም እኛ በፍቅር እናሸንፋችኋለን	0
አይ ፀሀይ እኛ ስራ ላይ ነን ለቅሶ ልንደርሳችሁ አንችልም ጊዜ የለንም	0
ሰውዬ የጋራ ታሪኩን ምነው የኔ የኔ ማለት አማራቹ ስም ሲሰጠው የኢትዮጲያ ቅርፅ ለሚባለው ምን በጠዋቱ እንደ ቁራ ያስለፈልፍካል	0
የአማራ የሚባል ቢሄር ታሪክህ ፈልግ ይሄ ተጋሩ አሻራ ነዉ	0
ክርስቶስ ተሰኀለነ አማርኛ ሆነ አሉ አማርኛ የቋንቋ ደረጃ ሳይደርስ ሆሆሆሆሆ ላቲንም ሳባም እንግሊዛም በቃ ሁሉም አማርኛ ናቸው እንግዲህ ምኞት አይከለከል	0
አማርኛ ከግእዝ መብለጡን ሌላኛው ማረጋገጫ ቢሆንስ	0
ሙሉ መረጃውን ላክልኝ ለመምህር መረጃ አይከለከልም ወይም ድህረ ገፁን ላልኝ	0
እጅህ ይባረክ ወንድሜ ሀቅን መካድ አይቻልም የአማራ ታሪክ ተቀብሮ አይቀርም አንድ ቀን ለአለም ህዝብ የአማራ ሙሉው ታሪኩ ከአመጣጡ ጀምሮ እንዲታወቅ ታሪክን እንመርምር	0
የቅርስና ማንነታቸውንም የሚቀይር ኮሚቴ አቋቁሙ	0
ሚኪይ አለም ጠንቅቆ አውቆናል ለዚህም ነው ሁሉም ድንጋዮች ወደ እኛ የሚውረወሩት ወደ እኛ የመጡብን እየመሰላቸው እንጅ ሁሉም ወደ ፍርድ አውድማቸው እየቀረቡ ነው	0
አማርኛን እና አማራው የሚባለው በድሮ ጊዜ ምን አገናኘው	0
ሚኪ እንደዚህ አይነት ቀልድ ስትፅፍ ምናልባት ምግብ እየበላን ልንሆን ስለምንችል ትን እንዳይለን ብታስጠነቅቀን ጥሩ ነው	0
እስኪ በሽዋ በጎጃምና ጎንዴር ለምልክቱም አኩሱማዊ አሻራ ካለ ወዲህ በለን	0
ወይስ መረጃዎቹ የቀበራቹት ትግራይ ውስጥ ብቻ ነው በጭሩ ትግራይ አማራ ነው እያልከን ነው	0
አወ ከእግዝያብህር ጋር እንደመቅደማችን እስከመቸ እየተገደልን	0
አማርኛማ በዛጉዌ ስርወ መንግስት ቀርቶ በይኩኖ አምላክ ዘመነ መንግስት ሳይቀር ልሳነአውድልት ማለት የአህዮች ቋንቋ እያሉ ያቃልሉት ነበር አለቃ አፅሜ በኛ መፅሀፋቸው ገፅ	0
በቃ ጥሩ ሁሉ የኛ ነው ምናለ ታሪክ ከምትመኙ ታሪክ ብትሰሩ እንደናንተ ማፈርያ የት ይገኝ ይሆን	0
ከቻል ሚኪ ሙሉ መረጃውን ላክልኝ	0
አገው ዛግዌ ዳይናስቲ	0
እስክሪብቶ ና ደብተር ብቻ ግብአት ያደረጉ ፀሀፊ ተብየዎች የዋሆችን ወደ ሚፈልጉት አቅጣጫ ሲዘውሯቸው ማየት እንደ አገር ያማል ለማንኛውም እያደር ይጠራልእንማራለን የሚል ተስፋ አለኝ	0
አያ በጥም ናውድ የሜሳዘናው ለምንደናው አገራቹን ኢትዩዸያ አያደለም ለያ ለአለም ትተርፉናበር ለምን ከሱራኤል አትማሮም ከተወላጃቹ ይልቅ ከሰደት የተመለሳት ሱራኤሎች ከአረባ አራት አገረ የተሰብሰብናው ገን ሁሎም ለሱራኤል እደገት እን በልፀጉን ናው ያሜሱብት ለምን ለአገሬቱ ኡይታሰብም አንዳ ዘር ትንሺ አንዳ ዘር ትልቅ ሲሁን አለም ጥላን ኋፈች እንድንደርሱበረት ሁኑ ወገኔ የሄ ተሱማምተን ያለ	0
ፅህፉ የሚያሳየው ግእዝ መሆኑን ነው ግእዝ ደሞ የተመሰረተው ሀ ለ ሀ የሚሉ ፊደሎች የተመሰረተ በ ትግራይ አኽሱም ነው በዚ ርግጠኛ ሁን	0
ቀማኛ ዘር የራሴ የማይለው የለም ይልቁንስ ታሪክ ስሩ እና አስመዝግቡ	0
አክሱም አሁን በትግራይ ዉስጥ ስላለ ብቻ አክሱም የትግሬ ስልጣኔ ብቻ አድርጎ የሚያስብ ሰወች ይህ ጥሩ ምስክር ነዉ እናመሰግናለን ሚኪያችን	0
የታሪክ ተመራማሪው ኘሮፌሰር ሪቻርድ ፓንክረስት የጥናት ውጤት ነውከልብ እናመሰግናለን	0
እንዲያ ከነበርለምንአላደገም	0
ሁሉም ወደ አማራ ድንጋይ የሚወረውሩት እኮ ማንነታችንን ታሪካችንን አውቀው ቅንጣት እንኳን ሊደርሱብን አለመቻላቸው እያናደዳቸው ነው	0
አማራ በጣም ተለሳለሰ እንጅ ትግራይም የአማራ እርስት ነበር	0
አረ ትንሽ ህፍረት የለም የትግራይ ህዝብ አመጣጡና ታሪኩ ለምን የአማራ ሊሂቃን ለመዝረፍ	0
ግእዝ ነው በብሄር አትጥበብ ጠበብተኛ	0
ንዲህ አይነት አነጋገር አማርኛን አታውቅም ወይም አታውቄም የኢትዮጵያ ብሎ መናገር ጥሩ ነው	0
አማራ ነን የሚሉ ታሪክ የመስራት አቅም ሆኖ እዉቀት ስለየላቸው የተጋሩየአገውየኦሮሞ ታሪክ ለመስርቅ ይመኩራሉ ሆነም ግን ታሪኩ አሳልፎ የሚሰጥ የለም	0
የሚያምርበት አኩሪ አተርዘይትበግ ስዘርፍ እንጂ ታሪክ ስዘርፍ አያምርበተም	0
ያለፈው ታሪካችን ሊያስተምረን የወደፊት ህይወታችን ደግሞ በጣም ሊያስጨንቀን ይገባል	0
ምን ይደረግ እግዲህ የአዳም ቋንቋ ነው ቢባሉም አይሰሙም እኮ	0
አስመላሽ ኮሜቴ አቆቅሙ	0
ሚኪ ያኔም አማራ እና ትግሬ የተለያዩ ነበሩ	0
ሰሀለነ አማርኛ ነው እንዴ ኪኪኪ	0
ከኦሮሚያ ክልል ለተፈናቀሉ የአማራ ተማሪዎች	0
ሚኩ አንቺ ኢኮኖሚክሱን ተንትኚ እንጂ ፉከራ አያምርብሽም በሻዪ	0
ቤተ ሰማእቲ ብሎ አማርኛ አንተ ታውቃለህ በሉት ሁሉ የኔ ሁላ	0
ኔ የኔ ትተን እስኪ የኢትዮጵያ እንበል	0
እኛ ምን የሌለንበት ቦታ አለ አማራ ኬኛ	0
ምን ዋጋ አለው የአለም መጨረሻ ከመሆን አላዳነህ	0
ክክክክ ትግረኛ የአማረኛ ፊደል ነው	0
የትግራይ አክሱም ዲቃሎች ነን አትሉም ባጭሩ ለምን ዙርያ ጥምጥም አስኬዳቹ	0
አማርኛ ሳይሆን ግእዝና ትግርኛ ነው	0
ያሳቅቃል ዝም ብትል ምን አለበት	0
ትግሬ ነኝ ብትል እኮ ሁሉም ታሪኮች ያንተ ይሆኑ ነበር	0
ገና ብዙ ጉድ ይወጣል አሳ ጎርጓሪ ዘንዶ ያወጣል መሰለኝ ተረቱ	0
ሁሉም የኔ የሚለው ኬኛ ብቻ ይመስለኝ ነበር ለካ ዋናው ባህር ዳር ነው የተቀመጠው	0
ትግርኛ ና አማርኛ ማነው የሚቀድመው	0
አማራ የሚለው ቃል አማረኝ ከሚለው የመጣ ነው ሁሉም ነው የሚያምራችሁ	0
አብን ዛሬ ባወጣው መግለጫ የአብይ አህመድ መንግስት ያለአግባብ ያሰራቸውን አመራሮቹን እና አባላቶቹን እንዲለቅቅ ጠይቋል	0
ከበግ ዝርፍያ ወደ ታሪክ ዘረፋ	0
አማራ የኢትዮጲያ ሲል ነው ሚያምርበት	0
ኸረ ሼም ነው የቄሳርን ለቄሳር	0
ክርስቲስ ሰህለነክርስቶስ መሀረናይቅር በለና	0
ወገን እንዴት ናችሁ አዲስ ህይወት እና ኢንቫይሮንመንት የመለማመድ ሁኔታ ላይ ነበርኩ ነገሮችን አስተካክየ ብቅ ብያለሁ	0
ከትቂት ወራቶች በፊት የአማራ ህዝብ እና ፖለቲከኛ ትልቁ ስራዉ በባለፉት አመታት የተገነቡ የፖለቲካ እና የኢኮኖሚ ተቋማት በማፈራረስ አዳዲስ ተቋማትን የአማራን ህዝብም ሆነ ሌላዉን በእኩልነት በሚጠቅሙ እና በሚያስተናግዱበት መንገድ መገንባት እንዳለባቸዉ እና ትልቁ የቤት ስራችን ይህ መሆኑን በሰፊዉ ገልጨዋለዉ	0
የአማራን ህዝብ ተቋማቶች ነዉ የጎዱት በወቅቱ ፓወር የነበረዉ ቡድን ተቋማቶችን ሲገነባ በማንኛዉም መንገድ የአማራን ህዝብ ክፉኛ በኢኮኖሚ በፖለቲካ እና ሌሎች ማህበራዊ ዘርፎች በሚያሽመደምድ መልኩ ነዉ	0
ህገመንግስቱ ፌዴራሊዝሙ ፓርላማዉ የፌደሬሽን ምክር ቤቱ ፖሊሲዎች እና መሰል ተቋማቶች ሰፊዉን የአማራ ህዝብ አግላይ ሁነዉ ነዉ የተመሰረቱት	0
በባለፉት አመታት የተገነቡ ተቋማቶች ወይም ድርጅቶች ሲፈርሱ እልል ብለን በእየአካባቢያችን ዝክር ሁሉ ልንዘክር ይገባል	0
የአማራ ፖለቲካ ትልቁ እምርታ ኢህአዴግ የሚበል ተዉሳክ ባለ አራት ድርጅት ስብስብ ሁሉም የአማራ ህዝብ ጠላት ናቸዉ በነገራችን ላይ መፍረሱ ነዉይህ ድርጅት አግላይ የሆኑ ተቋማትን ፖሊሲዎችን እና ስትራቴጅዎችን ወደ መሬት በማዉረድ የአማራን ህዝብ ለከፋ ችግር ያጋለጠ ድርጅት ነዉ ይህ ድርጅት እኮ የዉጭ ጉዳይ ፖሊሲዉን የአማራ ህዝብ ጠላቴ ነዉ	0
የሀገራችን ትልቁ ችግር አማራ የሚባል የድሮ ስርአት ሊያመጣ የሚሞክር ህዝብ ነዉ ብሎ ለወዳጆቻችን እና ለጠላቶቻችን ፕሮፖጋንዳ በመንዛት በአይነ ቁራኛ እንድንታይ ያደረገ ድርጅት ነዉ	0
ለሌሎች ኢትዮጵያዉያን ያለስማችን ስም በመስጠት በህዝባችን ላይ አደጋ እንዲደቀን ያደረገ ድርጅት ነዉ ከጎረቤት ሀገራት ኤርትራ ሱዳን ጋር ህዝባችን በማጋጨት እና ሌላ ፍላጎት እንዳለን በመሳል ከፍተኛ ችግር ዉስጥ የከተተን ድርጅት ነዉ	0
ኢህአዴግ ነገር ተወርቶ አያልቅም ድርጅቱ በራሱ የተነሳዉ የአማራ ህዝብ ጠላት ነዉ ብሎ ነዉ	0
የአማራ ህዝብ እና ፖለቲከኞች ከፍተኛ ጥንቃቄ ሊያደርጉ የሚገቡት በሚፈርሱ ተቋማት እና ድርጅቶች ላይ ሳይሆን አዲስ በሚመሰረቱት ተቋማት እና ድርጅቶች ላይ ነዉ	0
የአማራ ህዝብ ፖለቲከኛ ልሂቃን ባለሀብት ወጣት መታገል ያለበት አፍርሰን እንደገና የምንሰራቸዉ ተቋማቶች እና ድርጅቶች የባለፈዉን ስህተት የማይደግሙየአማራ ህዝብን ጥቅም እና ፍላጎት የማይሸረሽሩ ከዛም አልፎ ለማንኛዉም ኢትዮጵያዉ ጠቃሚ እንጅ ጉዳት የማያመጡ መሆኑን ማረጋገጥ እና መታገል እጅግ አስፈላጊ ነዉ	0
የአማራ ልሂቃን እና ፖለቲከኞች አሁን ላይ በከፍተኛ ሁኔታ ዝግጅት በማድረግ እየፈረሱ እንደገና በሚመሰረቱ ተቋማት እና ድርጅቶች ላይ የበኩሉን አሻራ ለማሳረፍ መዘጋጀት አለባችሁ	0
ይህ ትልቅ እድል ነዉ ስለዚህም ጥንቃቄ ልናደርግ የሚገባዉ እያፈረስን የምንገነባቸዉ ተቋማቶች የአማራን ህዝብ ፖለቲካዊ ኢኮኖሚያዊ እና ማህበራዊ ፍላጎቶች ባግባቡ የሚያስተናግዱ መሆናቸዉን ማረጋገጥ መቻል አለብን	0
ከባለፈዉ ትምህርት ወስደን አሁን ላይ ህዝባችንን በሚገባ የሚያስተናግድ ሲስተም አገሪቱ ላይ ማበጀት ይጠበቅብናል ኢህአዴግ ከዚህም በላይ መፍረስ አለበት	0
አሁንም ሙሉ ለሙሉ አልፈረሰም እራሱን በነበረዉ ስትራክቸር ጠጋግኖ ነዉ መምጣት የፈለገዉ	0
በተወሰነ መንገድ ግን ኢህአዴግን የሚባለዉን የባለ አራት ድርጅት ስብስብ እንዳያገኝ በማድረግ የአማራ ህዝብ የ አመት ትግል ዉጤት አፍርቶ ዛሬ ላይ በድርጅቱ ህልዉና ላይ አደጋ ደቅነንበታልድርጅቱን ቀስ በቀስ ከዚህም በላይ እናፈርሰዋለን	0
ችግሩ እየፈረሰ ያለው ኢህአዴግ የሚባል ድርጅት ብቻ ሳይሆን ሀገሪቷም ጭምር ነች	0
የፈረሰ ነገር የለም አራት የተለያየ ስም ያላቸው ድርጅቶች ሁሉም አማራ ጠል የሆኑ ብአዴንም ጨምሮ አሁን አንድ ስም ይዘው በአንድ ላይ ሁነው አማራ ጠልነታቸውን አጠናክረው እየመጡ ነው እናም ለአማራ የበለጠ ከባድ ፈተና ከፊቱ እየመጣ ነው	0
አሁን ምን አይነት ዝልፊያ ተመለከትክ	0
መጀመሪያም ይሄው ነገር ሲባል ሽንጣቸውን ገትረው ለብአዴን ሲከራከሩ የነበሩት የኛው አክቲቪስት ተብየዎች ነበሩ አሁን ደግሞ ሆነው እያየን ነው	0
የሆነው ሁኖ የኢኮኖሚ ም ሆነ የአሰተዳደር ፅንሰ ሀሳብ ያለትግበራ ቅዠት ስለሚሆን አሁን ላይ ይህ ሰንሰለት እንዳይተገበር የአማራን ትግል በተቃራኒ መስመር ገደል ለመክተት እየለፉ ያሉትን የቀድሞ ወንድሞቸረ በምን መንገድ ማስተካከል እንደሚቻል ሀሳብህን ብትሰጥ መልካም ነው ያለ ግል ፍላጎት ለአማራ ትግል እንቁም	0
ብልፅግናው ውስጥ የተዋሀደው የአማራው ክንፍ በብልፅግናው ውስጥ ገዝፎ እንዲወጣና የተሻለ እንዲሆን ከተፎካካሪወች ጋር መደራደርና መዋሀድ ቢቻል ውጤታማ ያደርገናልአዲስ የሚመሰረቱ ተቋማት ጥቅማችንን በሚያሳጣ መልኩ ከመዋቀራቸው በፊት እኛን ወክሎ የሚገባው ሀይል ተፅእኖ መፍጠር የሚችል ቢሆንአንዴ ከተዋቀሩ ሌላ ዋጋ ከፍለን የምናፈርሳቸው ይሆናልእስኪ መቀራረብና መደራደር ላይ ስራ ይሰራ	0
አብጦ አብጦ አስቸገረን	0
እጅግ ተናፍቀህ ነበር	0
እንኳን በደህና ተመለስክ	0
እንኳደህና መጣህ ሚኪ	0
እንድህ በበሰለ መንገድ ፖለቲካውን መከታተል አስፈላጊም ብቻ ሳይሆን ወሳኝ ጉዳይ ነው	0
ለአማራው ምን ይጠቅማል ለአማራ የሚሰጠው ጥቅም ጉዳት ዘርዘር አድርገህ አስቀምጥልን ሚኪ	0
ሚኪ እንኳን ደህና መጣህ	0
አዲሱ ፓርቲ ለአማራ ህዝብ ምን ጥቅም ምን ጉዳት አዝሎ መጥቷል ይህ አዲሱ ፓርቲ የአማራ ህዝብ ጠላቶች የእጅ ስራ አይደለንም ኦህዴድ ከወያኔ የተረከበውን የተረኝነት ሂሳብ ወያኔን እንዳይነሳ መቀመቅ አስገብቶ የራሱን የበላይነት በህግ እያፀና አይደለም ወይ	0
አንድ አይነት ቀለም ቢዋሀድ ያው ያን ቀለም ነው የሚሰጥህ ሁሉም በአማራ ጠል ትርክት የተመሰረቱ የ ዲቃላወች ናቸው ከነሱ ምንም መጠበቅ አያስፈልግም በቅርቡ ዲቃላው ሽመልስ አብዲሳ መስቀል አደባባይ የተናገረውን ልብ ይሏል ራስን አደራጅቶ በማንኛውም መስክ የአማራን ህዝብ ጥቅም ለማስከበር ማድረግ ብቻ ነው የሚገባ	0
ሚኪ እንኳን ደህና መጣህልን እንዳንተ አይነቱ ሰው ለአማራው ህዝብ ጠቃሚ ስለሆነ ባክህ አትጥፋብን	0
እንኳን ወደ ቤትህ ተመለስክ ስንት ነገር ተፈጥሯል መሰለህ ብዙ የአፋልጉኝ ማስታወቂያም የለጠፉ አሉ ለማንኛውም እንኳን በሰላም ተመለስክ	0
አማራ የህልውና ትግል ላይ ነው ወዳጄ	0
ህን ይዘህ እጥፍ በልልን	0
ዲግሪ የሚሽከረከር አለም አቀፍ አንቴና ጠፍቶብኝ ጭንቅ ብሎኝ ነበር	0
እንኳን ደህና መጣህ አማራ ላይ ወቅታዊ ችግር ሲፈጠር ብዙ ጊዜ ትጠፋለህ በሰላም ነው	0
የኢህአዴግን መፍረስ በተመለከተ ሀሳብህን መስጠትህ ጥሩ ነገር ሆኖ ነገር ግን የቸኮልህ መሰለኝ ምክንያቱም ገና ጨርሶ አመድ አልሆነም	0
ኢህአዴግ ህግ ስለማያከብርና ከአማራ ጥቅም በተቃራኒ የቆመ ድርጅት ስለሆነ አማራው ተደሰተ በማለት ውህደቱን እንደገና ሊቀለብሰውና በድሮው ግንባርነት ሊቀጥል ይችላልህወሀት ምስጥ ስለሆነችና ይህንን ነገር ቀድማ ስለተረዳች ከውህደቱ አፈንግጣለች	0
ምነው እንደዚህ ጥፍፍፍፍፍፍት ማለት ለማንኛውም እንኳን በደህና ተመለስክ	0
ጌታው እንኳን መጣህልን ይህ ግዜ ወሳኝ ወቅት ነውዘላቂነት ያላቸውን ተቋማትን ለመገንባት ከተጠቀምንበትና ተቋማትን በፍላጎታችን ልክ እንዲቀረፁ መስራት ከቻልን	0
ሚኪ እንኳን ሰላም ተመለስክ በጣም ወሳኝ ሰአት ላይ ነው የመጣኸው	0
አማራ ህዝብ ችግሩ ከኢህአዴግ ጋር ሳይሆን ከህገመንግስቱና ከፌደራሊዝም አወቃቀሩ ጋር ነው እነዚህ ሁለት ነገሮች ሪፎርም ካልተደረገባቸው በቀር የአማራ ህዝብ መከራ ቢብስ እንጂ አይቀንስም	0
ውህደት ዝቀተት እንዳትል አደራህን	0
ሚኪ ትህነግ በኦነግ ድምፀ ወያኔ በ ተቀያየሩ እንጅ ምን ፈረሰ ሁሉም የጊዜ መግዣ ነው	0
ለማንኛውም ግን እንኳን ደህና መጣህ ለውጡና ውህደቱ ግን	0
ይሰራ ስራ ይሄ የመሰረ የወያኔ ድረጅት አማራን ለመጉዳት የተመሰረተ አማራንም የጎዳ ነው መፍረስ አለበት መወገድ አለበት አማራ ተበድሏል አቀባዩ ደግሞ ኢህዴን ብአዴን አዴፓ ነው የሆዳሞች ስብስብ	0
ዝም ብለህ እኮ ብዙሀኑን አስጨነቅህው	0
እንኳን ደህና መጣህ ፌስቡክ የአልቃሾች መናኸሪያ ሆኖ ነበረ	0
የኛ ትልቅ ተቋም እንኳን ደህና መጣህ	0
የት ነው የጠፋህ ገና አላነበብኩትም መጀመርያ ስሜቴን ልግለጥ አንተ ከጠፋህ ጀምሮ ፌቡ እንዴት እንዳስጠላይ	0
እንኳን በደህና ተመለስክ _ ናፍቀህን ነበር	0
በጣም ጠፍተህ ነበር ትናንትና ዛሬ ጧት ወደፌስቡክ መንደር ብቅ ስል አንተ ነበር የናፈቅኸኝ ለምን እንደሆነ ታዉቃለህ የአማራ አክቲቪስት ተብየዎች አንድ መሀይም የጃዋር ቡችላ ኦብሳ የሚባል ታሰረ ምናምን እያሉ ጮቤ ሲረግጡ ሳይ በጣም ተበሳጭቼ ስለነበር ምክንያቱም እኛ የምንፈልገው እንዴት በፖለቲካ በኢኮኖሚ በማህበራዊ መስኮች ጠንካራና ተገዳዳሪ መሆን የምንችልበ	0
እንኳን በሰላም መጣህልን የኛ ነፍጠኛ በጣም ተጨንቀን ነበር የኛ አለኝታ	0
በፈጠረህ ሚኪ ፅሁፎችህን በመፅሀፍ መልክ ፅፈህ የህሊና ምግብ ይሆነን ዘንድ እንካችሁ በለን	0
በተላይ በኢኮኖሚ ዙሪያ የምትፅፋቸው ትንታኔዎች ገራሚ ናቸው የምር አደንቅሀለሁ ሚኪ የአማራ ኩራት ነህ ፍፃሜህን ያሳምርልህ	0
ዋውውውውውውውውው በእልተ ሚካኤል ሚኪየ መጣ ደስ ብሎኛል	0
እንዴት ነው አድስ ቦታ ና የአየር ሆኔታ እንካን ደህና መጣህ	0
አሁንም አመጣጡ አልሸሹም ዘወር አሉ ነው	0
ሚኪ እንወድሀለን በአቋምህ የፀናህ ለጠላትና ለጎጠኞች ጀሮህን የማትሰጥ ጀግና እኮነህ	0
የአማራ ባንክ ሌሎችም ያንተ ራእይ እውን መሆን ሲጀምር ባይናችን አየን	0
እንኳን ሰላም መጣህልን ሚኪ ትታጉ መሪያችን ወደንና ፈቅደን የምናነበው ፅሁፍ አጥተን ነበር የሰነበትነው	0
ህገ መንግስቱ ለግዱ መሻሻሉ የማይቀር ጉዳይ ነው ምክንያቱም የፌደራል የስራ ቋንቋ ጭማሪ የሚሻሻለው ህገ መንግስቱ ሲሻሻል ብቻና ብቻ ነው	0
ፖለቲከኞቻችን ጥንቃቂ ማድረግ ያለባቸው ህገ መንግስቱ ሲሻሻል የአማራን ህዝብ በሌሎች ኢትዮጵያዊያን ዘንድ እንደ ጠላት እንዲታይ ያደረገውን አንቅፅ በህዝቦች ዘንድ የተዛባ ግንኙነት እና ሌሎችንም አንቀፆች ማሻሻል መፋቅን ቸላ ማለት የለባቸውም ካደረጉ ታሪካዊ ስህተት ይሰራሉ	0
የእኔው ልዩ እኮ ነህ ዶክተር ጃናሞራ ና በል ታላቄ ተመልሷል	0
ናትህ አትጥፋ ወንድማለም	0
ሚኪ አትጥፋ እንዳንተ አይነት አስተዋይ መሪና መካሪ የአማራ ህዝብ አብዝቶ የሚፈልግበት ጊዜ ላይ ነን ምንም ቢሆን ከአማራ ችግር የሚበልጥ ነገር የለም	0
ሚኪ ይህ እንዳለ ሆኖ ለቀጣይ በሚመሰረቱት ተቋማት ላይ እንዳለፉት አመታት አማራ ባልተወከለበትና ባልተሳተፈበት ተቋም ላለመተዳደር የአማራ ምሁራን ንቁ ተሳትፎ ሊያደርጉ ይገባል	0
የህልውና ትግላችን የሁላችንንም ሙሎ ተሳትፎ የሚጠይቅ ስለሆነ ለአፍታም ከአጠገቡ መራቅ የትግሉ ጉዞ ፍጥነት ላይ ጉዳቱ ቀላል አይደለም ሚኪም እንኳን ደህና መጣህልን	0
ለማንኛውም እንኳን ደህና መጣህ	0
የደከሙት ተቋማት እንደገና በዘላቂነት ስለሚሰሩበት ሁኔታ ስትራቴጅውን ጠቁምልን	0
በዚህም አንፃራዊ ሰላሙንና ተመራጭነቱን ብሎም ህዝቡ ለኢንቨስተሮች ያለውን ክብር በማሳየት ክልሉ ላይ የኢንዱስትሪ አብዮት እንዲቀጣጠል መስራት ያስፈልጋል ክልሉ እንደ ሀገር የተከበሩ ተቋማትን ይገንባ	0
እንኳን ደህና መጣህ ነፍጠኛው	0
ሌላው የአማራ ኤሊቶች ችግር ፈሪ ናችሁ እንደ ሜንጫው ችግሮችን በገሀድ አትጋፈጡም ፕራክቲካሊ አማራን ሞቢላይዝ አታደርጉም ስለዚ አማራ በታሪክና በሀሳባዊነት ብቻ እየሻፈደ እንዲኖር ፈርዳችሁበታል ቁንጮ አጥ እና በየጎጡ በሚመሩ	0
መጀመሪያ ውህደት ማለት ምንድን ነውየአዴፓን ህጋዊ ሰውነት ያሳጠል ወይ አንቀፅ እንደሚያጡ ይደነግጋል	0
ይህ እውነት ከሆነ የአማራ ህዝብ ተመልሶ የባሰ መከራ ውስጥ በቅርብ ይገባል	0
የዛሬዋ እለት የመላእከት አለቃ ቅዱስ ሚካኤል የተከበረባት ታላቅ የደስታ ቀን ናት	0
አዎ እብሪተኛው ዲያቢሎስን ወደ ምድር የጣለው መለአክ ክብረ በአል	0
በወዲህም ደግሞ ማእረግየለሽ ምድራውያን ዲያቢሎሶችነን ሲታገል ኖሮ የጣለን ተናፋቂ ወንድማችንን መምጣት አበሰረን ደስታችንን እጥፍ ድርብ አደረገው	0
ሚኪ የመስቀል ወፍ ነው የሆንህብን ከተደመርህም ችግር የለም ግን አውአሎምን አስታውሰህ ምን እየታሰበ እንደሆነ በኦነጋውያንም በቁሙ በሞቱው በብአዴንም	0
በል እንግዲህ በውክልና ስራህን ይሰራ የነበረውን ሚኪ ውክልናውን አንሳለት	0
ሚኪ እንደ አቶ አዝዘው ጫኔ የለ ሆዳም ካለፈረሱ ምን ዋጋ አለዎ ይህ ሰው የወያኔ ተለላኪ የነበር አሁን ደገሞ የኦዲድ ተላላኪ ሆኖ እየገለገለ ነው	0
እኔ ግን ኢህአዴግ ስሙንና አሰራሩን ቀይሮ የመጣ ነው የሚመስለኝ እንጂ ኢህአዴግ አልጠፋም እደግመዋለሁ አልጠፋም አሁን ባለው ስሪት የአማራ ችግርም እየባሰ ይሄዳል እንጅ መፍትሄ አይሰጥበትም	0
እደግመዋለሁ ስሪቱ ለአማራ መፍትሄ የሚሰጥ አይደለም	0
ወደ አንድ የተጨፈለቀዉ የአራቱ እህት ድርጅቶች ቀጣይ አማራ ህዝብ ላይ ምን አይነት መከራ ሊያመጣ እንዳሰበ እዉነታዉን ብትነግረን አይሸልም ፈርሷል ብለህ ብቻ ከማዘናጋትትዝብት	0
በመጀመሪያ እንኳን ወደ ሰፊው ውቅያኖስ ተመለስክ በል እንግድህ በሰላው ብእርህ የአገሪቱን ፓለቲካዊ ኢኮኖሚያዊ ማህበራዊና ፓለሲያዊ አቅጣጫዎችን ቅዘፍና ባላንስ ሜኬር ሁን እንደለመደብህ ችፍ ሚኪ	0
ትክክል ግን ይህን የሚያስፈፅም ብቁ አማራ ይገኛል ወይ አዴፓ እንደሆነ እያየነው ነው ፍትህና እኩልነት አማራ ክልል ብቻ ምን ይጠቅማል ሌላው ክልል ያለው ወገንስ	0
መለስ ሆይ አናትህ ፍርስ ፍርስ ይበልልኝና አማራን ለመከፋፈል ልዩ ዞን ብለህ ከፈልከን አሁን ደግሞ በርዝራዦችህ ቅማንት ተጠቅመው ሊከፋፍሉን ሌት ከቀን ይሮጣሉ ራያን መተማን ሌሎችንም የአማራ ግዛት በሀይል የትግራይ ለማድረግ ሞከራችሁ በዚህ አልበቃ ብሎህ አኖሌን ተከልክ አሰብን አሶሰድክ ነፍስህን ዳቢሎስ ይውሰደውና አንተ እርጉም ዘርህ ሁሉ የተረገመ ይሁን	0
በመጀመሪያ ውህደቱን የደገፍከው ትመስላለህ	0
ሲቀጥልን ወደ መቀየር እንጅ አዲስ የሚፈርስም የሚመሰረትም ተቋም አይኖርም ይመስለኛል	0
መምጣትህ ጥሩ ነው ግን አጀማመርህ በፊት ሚኪን በማይበት መነፅር አላገኘሁህም አዝኛለሁ ለማንኛውም የራስህ ሀሳብ ስለሆነ ምንማድረግ ይቻላል	0
አፍርሶ መገንባት የሚባለው ነገር ጎድቶናልም ሰልችቶናልም እርግጥ አስፈላጊ ሆኖ ሲገኝ አፍርሶ መገንባት ጥሩ ነው ግን ባለፉት ሀያ ስምንት አመታት ከተዘረጋው ፖለቲካዊ ኢኮኖሚያዊና የህግ መዋቅር ፈርሶ ሊገነባ ያለ ተቋም ያለ አይመስለኝም ይልቁንስ የሚያስፈልገው ያለውን ማሻሻል ነው	0
በተለይ ህገመንግስቱ አማራን አይወክልም የሚባለው ነገር እጅግ ይገርመኛል	0
ቅር የሚያሰኝ የህገመንግስቱ ድንጋጌ ቢኖር በአዲስ አበባ የኦሮሚያ ልዩ ተጠቃሚነት የሚያወራው ክፍል ነው ከዚህ በዘለለ እምብዛም	0
የአዲስ አበባም ጉዳይ ቢሆን ህገመንግስቱ በሚረቀቅበት ወቅት በነደመቀ መኮንን ይሁንታን አግኝቶ ነበር	0
ስለዚህ ህገመንግስቱ የትህነግ ነው ምናምን የሚል አስተሳሰብ ተገቢ አይደለም	0
ስተሳሰብም ለትህነግ ካለ ጭፍን ጥላቻ ይመነጫል	0
እንደኔ እንደኔ ቢሆን አብዮታዊ ዲሞክራሲ የተሻለ ፖለቲካዊ ርእዮተአለም ይመስለኛል	0
እንኳን ደህና መጣህ ሚኪ	0
የተበላ እቁብ ወያኔ በኦነግ ተተክቶ አገር እየታመሰ ምኑ ነው የፈረሰው	0
መደመር ብልፅግና ምናምን ውሀ የሌለው ደመና ነው አሁንም ፀረአማራነቱን አስጠብቆ ለመቀጠል በአጭር ጊዜ ረዠም እርቀት ሄዷል መከላያውን ማን ወረረው የፍትህ ተቋማቱንስ መገናኛ ብዙሀንስ የማን ናቸው ገቢዎችስ	0
በመጀመሪያ እንኳን ደህና መጣህልን	0
በመቀጠልም እናንተ አክቲቢስቶችም ተገናኝታችሁ በመመካከር ችግሮቻችሁን ፈታችሁ ለአማራ ህዝብ ጥቅም ሲባል አንድ አይነት አስተሳሰብ በመያዝልዩነትን አርሞ ወይም ለጊዜው ወደጎን ትቶእንደ ሙሴ ባህሩን ልታሻግሩት ይገባል	0
ይህ ደግሞ እንደ እናንተ አይነት ከውነተኛ የአማራ ተቆርቋሪ አክቲቪስት የሚጠበቅ ነውና ከእናንተ የአማራ ህዝብ ብዙ ይጠብቃል	0
ንኳን ደና መጣህ ሚኪ አሁንም እኮ አአ እና ድሬዳዋ ከልተወከሉምየኢትዮጵያን ስም እንኳ ለመጥራት አይፈልጉም	0
ውዱ የእኛ አለኝታ የሽወች ግምት ምነው ድምፅ ጠፍ	0
ጥሩ ሰአት ላይ ከች ማለትህን ወድጄዋለሁ	0
ብአዴን የተባለ አይነ ጥላ ከአማራው ላይ ካልወረደ ለአማራው ምንም የተሻለ ነገር አይመጣም	0
ሚኪ እንኳን በሰላም መጣ	0
እንኳን በሰላም መጣህ ሚኪ	0
ክ ነው ከስር መሰረቱ አማራ ጠል ሆኖ የተቀረፀው እና ክፋው ህገመንግስትማ መፍረስ መፈራረስ ነው ያለበት	0
እኳን በደና መጣህ ሚኪ አንድ ጥያቂ አለኝ ምናልባት ምታቀው መረጃ ካለህ ስለ አለቃ መሳፍት በጣም ውስጤን እየበላው ነው	0
እስኪ እነዚህን መሰረታዊ ጥያቄዎች መልስልኝ	0
ያላግባብ ቡልቅቅ ብሎ የተከፈተው የአማራ ህዝብ ፖለቲካ መድረክ በውህደት ስም አማራዊ ያልሆኑ አጀንዳዎችን ማራገፊያ አይሆንም ብለህ ታስባለህ	0
መልእክቱ ጥሩ ነው ነገር ግን መልእክቱ የተላለፈበት ጊዜ ተገቢ አይደለም ገና ውህደቱ እንጭጭ እያለ ይህን ማውጣት ሌላ ተነስ ተንቀሳቀስ የምትል ያስመስልብሀል	0
እኔ ግን ጉልቻ ቢቀየር ወጥ አያጣፍጥም ባይ ነኝ ኢህአዴግ ውስጥ የነበሩ ጉልቻዎች ብቻ አይደሉም የወጥ እቃዎች ያው ናቸው ያሉት	0
ተቋማችን እንኳን ደህና መጣህ	0
እውነት ብለሀል ጥቅማችን በወሬ ጋጋታ ሳይሆን ተቋማት ለአማራ በሚሰሩት በጎ ነገር ይታወቃል	0
እንኳን ተመለስክ ችግሩ የአብን ቆራጥነት ማነስ እና ኦንገ ቤት ደጅ መጥናቱ ነው እንኳንም ጉዞውን ጀመረ አዴፓ ከአለቆቹ ጋር	0
ሚኪ ቀሽት አገላለፅ በርታ ኢሀዲግ ሙሉ ለሙሉ አልፈረሰም ድርጅቱን ቀስ በቀስ ከዚህም በላይ እናፈርሰዋለን ትክክልፀፀ	0
እንኳን ደና መጣህልን ወንድም ሚኪ	0
ውህደቱ ለድርጅቱ መጥፊያ ቢሆነውማ እንዴት ሽጋ ነበር መሰለህ	0
ኪ ለአማራ መከታ ነህሀሳቦችህ ሁሉ ይመቻሉ ህወሀትን ከአዲስ አበባ የአወጣ አምላክ ኢህአዴግን ከኢትዮጵያ ይንቀልልን	0
ሁላችሁም ለእዚህ ለሱ ጥሩ አስተያየት የምትሰጡ ብአዲኖች ናችሁ እናቃለን ሚኪ አማራ ሀይሉ ቢታንያ የአማራ ሳይንት ልጂ ነው አማራ ሳይንት አጂባር እንዳንተ አይነት ከሀዲ የለም አፈር ብላ	0
ሚኪ በሰላም መመለስህ ያስደስታል ኢህአድግ ወደ ብልፅግና ፓርቲ መቀየሩ ለኔም ደስታን ከፈጠሩልኝ ነገሮች አንዱ ሲሆን መቀየሩ በራሱ ግብ አይደለም ለውጡ ለአማራው ህዝብ እንዳለፉት አመታት አማራውን አግላይና ተጠቃሚነቱ በተረት ተረቱ አዙሪት ተጠልፎ እንደገና ደግሞ እንዳለፉት የትህነግ ዘመናት ስቃይና መከራ አንዳይደገም በአደን አደፓ ጥንቃቄ ማድረግ እንዳለበት ተረድቶ የድርሻውን ካልተወጣ	0
እንኳን በሰላም ተመለስክ	0
ንኳን መጣህልን	0
አትጥፋብን ማኛው	0
ኸረ ሚኩ አትጥፉብን	0
እኳን መጣህ	0
ኑርልን	0
ዶር ብርሀኑ ስትራቴጅካል እና ታክቲካል አጋር ብሎ የለያቸዉ አሉ ይሄም ከ ወቹ ጀምሮ ካቀነቀነዉ የፖለቲካ ርእዮተ አለም ጋር በማወዳጀት ነዉ	0
በተማሪነቱ ዘመን አማራ ጨቋኝ እና የበላይ ብሎ ፈርጆ መነሳቱ ይታወቃል ይህ የእርሱ ብቻ ችግር አይደለም ያዉ ፋሽን ነበር በዘመኑ	0
ከቅርብ ጊዜ ወዲህ ከህወሀት ጋር ባለመስማማቱ እና አማራን የሚያክል ህዝብ ጨቋኝ ነዉ እያልክ እየተናገርክ በሀገሪቱ ላይ ይሄ ነዉ የሚባል የፖለተካ ፓወር ማግኘት ከባድ መሆኑን የተገነዘበዉ እንዲሁም ባጠቃላይ ህወሀት ከልክ በላይ የጎሳ ፖለቲካን በመለጠጡ ስላልተመቸዉ የተወሰነ በማሻሻል እኩልነት የሰፈነባት ኢትዮጵያ ወደሚል ትርክት ቀይሮ መንገዱን አስተካክሏል	0
የአማራ የበላይነትን ማጥፋት የሚለዉ ነገር እኩልነት በሰፈነባት ኢትዮጵያ በሚል ዉስጥ ተጀቡኗል	0
አልፎ አልፎ በመደረክ ላይ ሳት ሲለዉ ወይም በግንቦት ሰባት የፕሮገራም ዶክመንቶች ላይ የአማራ እና የትግሬ የበላይነት መደረግ እንዳለበት ይገልፃል	0
ዶር ብርሀኑ የሰሜንየአቢሲኒያ የፖለቲካን ይጠላል ፍላጎቱ የሰሜኑን ፖለቲካ ማቀጨጭ ነዉ በኢትዮጵያ አንድነት እንዲሁም ዲሞክራሲ ያምናል	0
ነገር ግን ከዉስጡ የሰሜን የፖለቲካ ይሄን የሚያሳይ ተጨባጭ ሁኔታ ባይኖርም አለ ብሎ ስለሚያምን መሰበር አለበት ብሎ ያምናል	0
በዚህ ምክንያት ኦዲፒኦህዴድ በሉት ኦነግ ወይም ኤርትሪያ ደቡብ እና ሌሎቹ ስትራቴጅክ አጋሮቹ ናቸዉ አማራ ታክቲካል አጋሩ ነዉ	0
ታክቲካል አጋሩ ስንል ኢትዮጵያዊነትን በማቀንቀን ድጋፍ ማግኘት ነገር ግን አሁን ያለችዉ ኢትዮጵያ በራሷ የአማራ አቢሲንያ ስሪት ናት እናም ይህ መክሰም አለበት ብሎ ያስባል	0
ስለዚህም አማራ መረማመጃዉ እንጅ ሰዉየዉ በልቡ ያለዉ ነገር የአማራ መቀነስን ነዉ	0
ዶር ብርሀኑ በአንድነቱ ጎራ ዉስጥ ጠንካራ አማራ እንዳይኖር በደንብ ሰርቷል እሱ ብቻ ሳይሆን ዶር ብርሀኑ ከአማራ ዉጭ ከሆኑ ሰወች እና ፓርቲወች ጋር የቱንም ያህል ልዩነት ይኑረዉ አብሮ መስራት ይፈልጋል ሲሰራም ይታያል	0
ከአማራወቹ ጋር ግን አብሮ መስራት አይደለም ቢችል ማጥፋት አለያ ደግሞ ይህ ነዉ የሚባል አስቷፅኦ እንዳይኖቸዉ ያደርጋል	0
ሚዲያዉን በመጠቀም በዚህ ዙሪያ ላይ ዉጤታማ ስራ ሰርቷል	0
በራሱ ሚዲያ ዉስጥ ያሉ ደህና ደህና አማሮች ጋር እንኳን አይስማማም ለምሳሌ ከእነ አበበ ገላዉ ጋር ምናላቸዉ ጋር	0
ከላይ እንዳልኩት ከስትራቴጅክ አጋርህ ጋር እንጅ ከታክቲካል አጋርህ ጋር ጠለቅ ያለ ግንኙነት እንዲኖርህ አትፈልግም ለምሳሌ ዶር ብርሀኑ ከእነ መራራ በየነ ጴጥሮስ ሌንጮ እና ሌሎቹ ከአማራ ዉጭ የሆኑ በአንድነቱ ጎራ ያሉ ሰወች ጋር አብሮ የመስራት ምንም ችግር የለበትም	0
ከእነ ልደቱ ኢንጅነር ሀይሉ ኢንጅነር ይልቃል እናም ሌሎች ጠንካራ የአማራ ልሂቃን ጋር አተስማምቶ መስራት አይደለም በተለያየ ታክቲክ ከገቢያ ዉጭ ሲያደርጋቸዉ አይተናል	0
ከገቢያ ዉጭ እንዲያደርጋቸዉ ደግሞ ሌሎች ስትራቴጅክ አጋሮቹ ያግዙታል	0
አለያም ደግሞ እዚህ ግባ የማይባሉ ይህ ነዉ የሚባል ተፅእኖ የሌላቸዉ እና በአማራ ህዝብ ዘንድ እንደ አይከን የማይታዩ ጥቃቅን አማሮችን ባካባቢዉ ይሰበስባል ኤርትራም ቢሆን የሰሜን ፖለቲካን ማክሰም አላማዋ ነዉ	0
በዚህም ምክንያት ዶሩን ለረዥም አመታት አስተናግዳዋለች	0
እኩልነት ሲል ማን የበላይ ማን የበታች እንደሆነ አይታወቅም ነገር ግን በዎቹ በተነሳበት ትርክት ስንሄድ ሌሎቹን ከአማራ ጋር እኩል የማድረግ አይነት ቅላፄ አለዉ በእርሱ አገነዛዘብ እኩል አይደሉም ብሎ ስለሚያስብ	0
ነገር ግን ብርሀኑ ፖለቲከኛ ነዉ ፖለቲካ ደግሞ ፓወር ማግኘት ነዉ ስለዚህም የወጣበትን ብሄር የሙጥኝ ቢል ወይም ደግሞ የብሄር ፖለቲካ ጥሩ ነዉ እናራምደዉ ካለ ጉራጌ ዉስጥ መግባቱ ነዉ ጉራጌን ብቻ ይዞ የሀገር መሪ ይሄናል ወይ ብንል አይሆንም	0
ስለዚህም ወደደም ጠላም የአንድነት ፖለተካ ላይ ብቻ ሙጭጭ ማለት አለበት ነገር ግን የመጨረሻ ግቡ ኢትዮጵያ ከብሄር ፖለቲካ ብትነፃም አዲሷ ኢትዮጵያ ከአቢሲንያዊ የፖለቲካ አስተዳደር ዘይቤ የራቀች ነገር ግን የፖለቲካ መልኳ ከሰሜኑ ወደ ደቡቡ ያመዘነ መሆን አለበት ብሎ ያስባል	0
ለምእራብዉያኑም ከሰሜኖች ይልቅ እርሱ ተቀባይነት እንዳለዉ አድርጎ አቅርቧል	0
ኔ በአማራም ከአማራ ዉጭ ባለዉም ህዝብ ዘንድ ተቀባይነት አለኝ ብሏል ነገር ግን ከሰሜን የሚመጡ ፖለቲከኞች በደቡቡ ህዝብ ተቀባይነት እንደማይኖራቸዉ አስረድቷል	0
አማራን ከደርግ ጋር አያይዞ ተቀባይነት እንደሌለዉ ትግሬወቹን ደግሞ ህወሀቶች ባሳዩት ወንበዴነት እና አምባገነንነት ተጠቅሞ ለነጮቹ የሰሜን ፖለተካ ለሀገሪቱ አንድነት አደገኛ እንደሆነ ተርኳል	0
ከመለስ ሞት በኋላ ኢህአዴግ ድንገት ቢንገዳገድ ዶር ብርሀኑ ቁጥር አንድ አማራጭ እንደሆነ ነጮቹ ወስነዋል ለዚህም ነዉ የጉሬላ ጦርነት ዉስጥ የገባን ሰዉ የአዉሮፓ ፓርላማ ድረስ እየተጋበዘ ንግግር ሲያደርግ የነበረዉ	0
ይሄም የሰዉየዉን ሀሳብ የመስማት እሱን የማድረግ እና የማስተዋወቅ ስራ ሲሰሩ የቆዩት	0
ህወሀት አንድ ቀን እንደሚወድቅ ወይም እንደሚገፉት ያዉቃሉነገር ግን ከዉስጡ የተወሰኑ ሰወች አፈንግጠዉ በመዉጣት ኢህአዴግን ይታደጉታል የሚል እምነት አልነበራቸዉም	0
ኦህዴድ የዶር ብርሀኑ ስትራቴጅክ አጋር ነዉ ኦህዴድ የሰሜኑን ወይም የአቢሲንያን እነርሱ እንደሚሉት ፖለቲካ ተገዳድሮ አሁን ፖለቲካዉን ወደ ደቡብ እያዞረዉ እንደሆነ ይሰማዋል ይህ ከዶር ብርሀኑ ራእይ ጋር እጅግ ተመሳሳይ ነዉ	0
ዚህም ምክንያት ከኦሮሞ እንዲሁም ከደቡብ ፖለቲከኞች ጋር ጥንቃቄ በተሞላበት ሁኔታ አማራ በማያኮርፉበት ሁኔታ ፖለቲካዉን ያስኬዳል ከሰሜኖች ጋር ላለዉ ነገር ብዙም አይጨነቅም	0
ምክንያቱም አንደኛ የትም እንደማይሄዱ ያዉቀዋል ሁለተኛ ተፅእኗቸዉን መቀነስ አላማዉ ነዉ	0
ስለዚህም ከደቡብ በኩል ያለዉን አዲስ ሀይል ኦህዴድን ጨምሮ ማድረግ ነዉ ዋናዉ የሱ ስራ	0
አቢሲኒያወች ተግደርዳሪ እንዳይሆኑ እሱ እራሱን ብቸኛዉ የአንድነት ጎራዉ መሪ አድርጎ በመሳል ሰሜነኞችንም የወከለ እንደሆነ አድርጎ በመሳል አለሳልሶ ይዟቸዋል	0
አዲስ አበባ ላይ የኦሮሞ ፖለቲከኞች የፈለጉትን ነገር ሲያደርጉ አንድም ነገር ትንፍሽ የማይለዉ	0
በዚህ ምክንያት ነዉ ከጠቅላይ ሚኒስቴር ቢሮ በሳምንት ቀን የሚገኘዉ አዲስ ፎርቹን እንደዘገበዉ ከአቶ ለማ ቢሮ በሳምንት ሁለት ቀን ይገኛል ከታከለ ኡማ ጋር እንዲሁ በየሁለት ሳምንቱ ተገናኝተዉ ይመክራሉ	0
ስለዚህም ከኦፒዲኦ ከስትራቴጅክ አጋሩ ጋር ሁኖ አላማዉን እያሳካ ነዉ ኢትዮጵያ ከአቢሲኒያሰሜነኞች ፖለቲካ አምሳል ከተላቀቀች በኋላ ኦሮሞወች እራሱ የዘር ፖለተካን አሽቀንጥረዉ ይጥላሉ	0
ምክንያቱም አዲሲቱ ኢትዮጵያ በአብሲንያ አምሳል እነሱ እንደሚሉት ሳይሆን በገዳ አምሳል የምትሰራ ስለሚሆን በገዳ አምሳል ከተሰራች በኋላ ብሄር ተኮር ፖለቲካ ለኦሮሞ አያዋጣዉም	0
ብርሀኑ ደቡብ ክልል ወደ ሶስት እና አራት ክልል ቢከፋፈል ደስተኛ ነዉ ደቡብ ክልል አቢሲንያዊ ሴንትመንት አለ ተብሎ የታመናል	0
ስለዚህም ደቡብ ተከፋፍሎ አማረኛንም ትቶ የራስ የራሱን ቋንቋ እየተጠቀመ ኢትዮጵያዊ ሆኖ እንዲቀጥል ይፈለጋል እኩልነት የሚለዉ ይሄን ይመስለኛል	0
ለ ዶር ብርሀኑ እኩልነት ማለት የሰሜኑን ፖለተካ ማቀጨጭ እስከሆነ ድረስ የደቡብ ብሄሮች ከሰሜኑ ጋር የሚጋሩትን ነገር አዉልቀዉ እንዲጥሉ ይፈልጋል	0
ለዚህም ነዉ ዶር ብርሀኑ ለክልልነት ሲታገሉ ለኖሩት ለሲዳማወች የእርሱ በሆነዉ ኢሳት ሚዲያ የአየር ሰአት ተሰጧቸዉ ህዝባቸዉን ሲያነቁ የኖሩት ለአማራ ግን ይሄን እድል ነፍጓል	0
ኦሮሞ ፖለቲከኞችም ዋና ስራቸዉ ደቡብን መበተን ነዉ ስለዚህም ዶር ብርሀኑ የሲዳማን ክልልነት የጉራጌን ክልልነት የወላይታን ክልልነት የሚደግፍ ይሆናል	0
ጠቅላይ ሚኒስቴሩም በባለፈዉ የፓርላማ ንግግሩ ደቡብ ክልል ወደ ሶስት ክልል እንደሚሆን አስረደቷል ዶር ብርሀኑ ይሄን ያዉቃል አላወገዘዉም ግን	0
ነገር ግን ዶር ብርሀኑ ከኦሮሞ ፖለቲከኞ የሚለየዉ በኢትዮጵያ አንድነት ላይ ብዥታ የለበትም	0
የእርሱ ትልቁ ችግሩ ኢትዮጵያ በሰሜኖች አምሳል ተሰርታለች ብሎ ብቻ ማሰቡ ነዉ በሱ ዙሩያ ያሉት የደቡብ ልሂቃን ይሄን በግልፅ ይሉታል	0
ሚንሊክን በገሀድ ያወግዛሉ ዶር ብርሀኑ ምኒልክንም ሆነ አጤ ቴወድሮስን ወይም አፄ ዮሀንስን አንድ ቀን ሳት ብሎት ስማቸዉን አያነሳምየብሄር ፖለቲካ ህወሀት እንደለጠጠዉ እንዲሆን አይፈልግም	0
ክልል የሚለዉ ነገር እንዳለ ቢቆይም ችግር የለበትም ነገር ግን ብሄርን ከፖለቲካዉ የመነጠል ወይም የፖለቲካ ጨዋታዉን ከብሄር ላይ በማንሳት ብሄር ተኮር ፖለተካን ልክ እንደ ሰሜን ፖለተካ ብዙ ሮል እንዳይኖረዉ ማድረግ ነዉ	0
ሌላኛዉ የሰሜኑን ፖለተከኞች አቅም የሚቀንስበት መንገድ ከላይ እንዳልኩት አማራዉን እሱ በትክክለል እንደሚዎክለዉ በመናገር ትግሬዉን ደግሞ ከኤርትራ በኩል ጫና እንዲደርስበት በማድረግ ነዉ	0
ዶር ብርሀኑ አዴፓን ብዙም የሚፈለግበት መንገድ የለም ክልሉ ላይ ጥሩ የፖለተካ መጫወቻ እንዲያዘጋጅለት ብቻ ነዉ የሚፈልገዉ	0
ከቻለ ደግሞ አብን የሚባል የወጣት ስብስብን አደብ እንዲያስይዝለት ነዉ የሚፈለገዉ	0
ለኔ ግን ከፅሁፉ በላይ አማራ በመሆንህ ኩራቴ የሰማይን ጋንጋርታም ተራራዎች ያስርዳል እናመሰግናለን	0
ምክንያቱም አዲሲቱ ኢትዮጵያ በአብሲንያ አምሳል እነሱ እንደሚሉት ሳይሆን በገዳ አምሳል የምትሰራ ስለሚሆን	0
ትንሽ ዘርዘር እድርገህ በራሱ መፅሀፍ የተገለፀው ብርሀኑ እና ከእስር ከወጣ በሆላ ያለውን ተቃርኖ ለሪፓርተር በረራአዲስ አድማስ እና ኢቶዽስ ብትልከው ብዙዎችን እንዲያሰላስሉ ይረዳል	0
ትልቅ ትንተናና ነው እውነትም ብለሀል ፅፈሀልም	0
ግን ነፈዞቹ የ አዴፓ አመራር በጠዋቱ ይሄን ማንበብ የሚችል አንጎል ይስጣቸው ባጭሩ አሁንም በተደጋጋሚ እንደምናየው አዴፓ በኦዲፒ በተደጋጋሚ እየተበላ ነው	0
ብርሀኑ እኮ የፓለቲካ ቁማሩን ተበልቷል እሱ ብቻ ሳይሆን በሱ እጅ የአንድነቱን ሀይል እናገኛለን ያሉት ዶር አብይ እና ለማም ቁማር ተበልተዋል ይህንም ሳያስቡት ጉድ የሰራቸው ዶር ደሳለኝ ጫኔ ነው አሁን ሁሉም ጭብሉ ወልቁል ወገኖቸ ከዚህ በኊላ ወይ በሀቅ ፖለቲካ ካልሆነ ጠመጃ እንጅ የደባ ፖለቲካ እጅ ጥምዘዛ ተበላበት ድሮ	0
የማላምንበትን ነገር ብትፅፍ እንኳን ትንታኔህ የመስጠኛል እና ላይክ ገጭቼሀለሁ	0
በዚህ ፅሁፍ ዋነኛ ስህተት መስሎ የሚታየኝ ከእንግዲህ የኢትዮጵያ ፖለቲካ በአንድ ወይም በጥቂት ግለሰቦች ሊዘወር ይችላል በሚል እሳቤ ለብርሀኑ የሰጠኸው የተጋነነ ቦታ ነው ብቻውን የትም ሊደርስ አይችልም	0
አብረዉት የሚሰሩት በሙሉ ከቀድሞ ብአዴንና ኦህዴድ ካድሬዎች በባሰ ሁኔታ በጭፍን የሚከተሉና የራሳቸው የሆነ አቋምና ግብ እንደሌላቸው አድርገህ ማሰብህ ሌላኛው ስህተት ነው	0
ስለ እውነት ለመናገር ከዚህ ብኋላ የግለሰቦች የተጋነነ ሚና በኢትዮጵያ ፖለቲካ ውስጥ የሚጫወቱበት እድል መክኗል እንዳውም ከፖለቲከኛው በላይ የበለጠ ፓወር የሚኖራቸው እነ ነብይ ፍልስጤም ናቸው	0
ይህን የምልህ በሁለት ትላልቅ ምክንያቶች ነው አንደኛው አሁን ያለው ማህበራዊ ቅርፅና የህዝቡ ንቃተ ህሊና ለዚህ አይመችም ለመበታተን ጫፍ ላይ ያለን ማህበረሰብ በግለሰብ ይሁንታና የሴራ ፖለቲካ ክህሎት ልትይዘው አትችልም	0
ሁለተኛው ለማሰብ ከምንችለው በላይ የኢትዮጵያ ፖለቲካ የሚዘወረው ጂኦፖለቲካው ላይ ባሉ በጣም አክቲቭ የውጭ አገራት ነው	0
ጂኦፖለቲኪሱ ደግሞ እጅግ በጣም የተወሳሰበና ብዙ አክተሮችን ያሳተፈ ነው	0
አሜሪካ ብርሀኑን ለማብቃት ብትሰራ አረቦች ሌላውን ቻይናና ራሽያም ሌላኛውን ፖለቲከኛ ለማብቃት ከጀርባ ይሰራሉ ቀዝቃዛ ጦርነት ክፍል ሁለት ውስጥ የመግባት እድላችን ከፍተኛ ነው መንግስት ብቻ ሳይሆን ተቃዋሚዎችም በቀጠናው እየተፋጠጡ ባሉ ሀያላን አገራት ሳይድ መያዝ የሌለባቸው ግዜ ላይ ነን	0
እንደ አገርና እንደ ህዝብ ለመቀጠል ከእንግዲህ ሊገዛንና ሊያስተዳድረን የሚገባው የህግ የበላይነት ብቻ ነው የህዝብን ፍላጎት የሚያደምጥ የህዝብን ውሳኔ የሚቀበልና የሚያከብር ተጠያቂነት ያለበት መንግስት መፍጠር ብቻ ነው አብሮ የሚያኗኑረን ብርሀኑ ይህ የማይታየውና ተሽሎክሉኮ ወደ ስልጣን ለመምጣት ብቻ የሚያልም ግልብ ነው ብዬ አላምንም	0
ነገር ግን ዶር ብርሀኑ ከኦሮሞ ፖለቲከኞች የሚለየው የኢትዮጵያ አንድነት ላይ ችግር የለበትም ሰው ይታዘበኛል እንዳትል የከለከለህ ሀሳብህን እንደ መለኮት የሚቀበል ግሪሳ አለ ፅሁፍህ ያስረዳኝ ነገር ቢኖር በእኩልነት እንደማታምን ነው	0
ጥሩ ፀሀፊ ነህ ባትገለጥም ጥሩ ፀሀፊዎች ሁላ ግን እውነት ይፅፋሉን አንተም ታቀዋለህ ጭፍን ጎሰኝነት ጭፍን ጥላቻም ስላለበት በተለይ ኢሳትን ለአማራው ሲሆን እያልክ የምትተርከውን ሰው ይታዘበኝ ይሆን ሌላኛውን የፅሁፌ ትርክት አጋልጦ ይሰጥብኝ ይሆን ብለህ አለማሰብህ ካለህ ጭፍን ጎሰኝነት የተነሳ ይመስለኛል	0
ፕሮፌ ብርሀኑ ስለ አአ ጉዳይ ሆነ በተለያየ ግዜ በፌስቡክ በሚራገቡ ጠርዝ የያዙ እሰጣ ገባዎች አግ ቶሎ መልስ አለመስጠቱ አስተቺ እንደመሆኑ ግን ደግሞ ገና ከውጭ ከመምጣታቸው በፊት ትግሉን እናግዝ በማለታቸው አንዳንድ ነገሮች ላይ ለዘብተኝነት ታይቶባቸዋል ይሄው ላንተ አይነቱ በጎሰኝነት ብእር ለሚፅፉ ተላልፈው ተሰጥተዋልዛሬ የተወለደውን አብን አግላይ የፖለቲካ ቡድን ከፍ ከፍ ለማድረግ ጭምር	0
እኔ እስከገባኝና ስህተት ውስጥ እንዳይወድቁ የምፈራው አንዳርጋቸው ወያኔዎችን ልርዳ ይታገዙ በሚል ቀና ሀሳብ ረዘም ያለ ግዜ ችግራቸውንም እያየ ውሳኔ ወስኖ ለመለየት ግዜ እንደወሰደበት ዛሬም ችግሮች ይኖራሉ ግን ደግሞ እናግዛቸው ሀገሪቱ ትረጋጋ እያሉ ዝምታን በመምረጣቸው አንድም ለራሳቸው መጥፊያ ሁለትም ለውጡም ሀዲድ እንዳይስትና በአዲስ ጎሰኛ ሁሉ ነገር ቁጥጥር ስር ግብቶ ለሁላችንም ሌላ ዙር አጣብቂኝ እንዳይሆን እፈራለሁ	0
አሁን ላይ ግን ያለህ መረጃ በሳምንት የየት እንደሚያሳልፍ የገለፅከው እውነታ ቢኖረውም አንተ እራስህ አቋም የያዝክለት የፖለቲካ ቡድን ስላለ መድረክ ስታገኝ ከሌላኛው ጋር ፊት ለፊት ሞግተህ እንወቅህ እንጅ አሳምረህ ስለፃፍክ የአብን ቡችሎች ጌታቸውን አይነትጋዜጠኛ አይመስለኝም አዲስ ነጠላ ዜማ ሰጥተሀቸው ይሄው ገና ሳይነጋ ቡፍ ቡፍ ማለት ጀምረዋል	0
አንድ ነገር ግን አረጋገጥክልኝ አግ ሆነ ፕሮፌ በአንድነት ለኢትዮጵያ እንደማይታሙ ያንን ነው እኛም እምንፈልገው ኢሳትም የደከመው በድልም ኢትዮጵያ የገባው	0
ስም ጠቅሰህ ለማባላትም ጥረት እያረክ ነው እነሱ እራሳቸው መልስ ይሰጣሉ	0
ብአዴን ቢሮ ውስጥ ተዘርፍጦ ማመልከቻ እየተቀበለ ከመምራትመፈረም ያለፈ እውቀት ያለው ሰው የለውም በእውቀትና በፖለቲካ ድርቅ የተመታ የክልል መንግስት ማለት የአማራ ክልል መንግስት ነው	0
የሚገርም የዛሬው ይለያል ልበልሚኪ ቀጣይነት ቢኖረውስክፍል ሁለትን እንጠብቃለን	0
አብንን ግን እረሳሀውእና ደግሞ ማርከሻውንም ጨምርልን ሚኪ ያው ይሄም እንደ አንድ ማርከሻ ተቆጠሮ	0
ስለ ዶክተር ብርሀኑ እያወሩ ኦነግን ማንሳትስለ ኦሮሞ ማውራትእኔ አይመቸኝም	0
ሚኪ ብዙ ሰዎች ጥሩ ሰው እንደሆንክ ያወራሉ ነገር ግን እራስህን መቻል አለብህ	0
የማውራት ችግር እንደሌለብህ አስተውያለሁ በየርእሱ ስለ አዲስ አበባ እና ኦሮሚያ መቀላቀል የአንባቢ ትኩረትን መሳብ እንጂ የእውቀት ክፍተትን እንደማይሞላ መገንዘብ አለብህ	0
ኪ ይህ የአመቱ ግሩም ትንታኔ ነው እናመሰግናለን ህዝብን ማንቃትና ከሴረኞች መጠበቅ ማለት እንዲህ ነው በመሰረቱ ይህ ፅሁፍ በጋዜጣ በመፅሄት እንዲሁም በድረገፅ ላይ መውጣት ይኖርበታል	0
ለዚህ እኮ ነው አቶ ልደቱ በብርሀኑ ሴራ ነው ከህዝብ የተለየው የምንለው	0
ለዚህ ደግሞ በወቅቱ የነበሩት የህትመት ጋዜጠኞች ፋሲል የኔአለም ሲሳይ አጌና እና እስክንድር ነጋ የልደቱን ስም በማጠልሸቱ ረገድ ጉልህ ሚና ተጫውተዋል	0
ለዚህ ድንቅ ትንታኔህ እናመሰግናለን ሚኮ	0
በመጨረሻም ከአማራው ህዝብ ምን እንደሚጠበቅ ጨመር ብታደርግባት ሸጋ ነበርሁሌም የምትለው ጉዳይ ቢሆንም	0
በ አሁኑ ሰአት አዲስ አባባ ላይ ለ አዲስ አባባ ህዝብ እና አብን ብቻ ናቸው ከጎኑ ያሉት ይህንን ደግሞ ህዝቡ ድብን አድርጎ ያዉቃል ብሬማ ተበላች አጎብዳጅ መሆን እንደብሬ ከጂ እንደ ዛዲግ እና ኤርሚያስ ለገሰ	0
ይህንን እውነት በጥብጠህ ብትግታቸው የሚያቅራቸው የገዛ ወንድሞቻችን ከእርሱ እግር ስር እየተንከባለሉ የአማራን ህዝብ አንድነትንና መደራጀት በኢትዮጵያ አንድነት ስም ሲያደናቅፉት ይውላሉ	0
ከብርሀኑ ይልቅ ዛሬም ሆነ ትላንት የአማራ ህዝብ ጠላቶች ለወገናቸው ደንታ የሌላችው ከአብራኩ የወጡት የዛ ትውልድ ቅሪቶችና ልጆቹ ናቸው	0
አዲሱ የአማራ ትውልድ ግን አብሪ ኮከብ ሆኖ ወጥቷል ነፃነቱን ለማግኘት እስከ ጎልጎታ ይሄዳል ድልንም በጠላቶቹ ላይ ያበስራል	0
የታሪክ ድድብና ካላነቀሽ በስተቀር በምን እይታና ሂሳብ አርቆ አሳቢው ብሪሽ ከሰሜን ኢትዮጵያ ህዝብ ታሪክ ጋር ጠብም ቅሬታም ሊኖረው አይችልም ያዉ የተለመደ ውንጀላ የተለመደ የጨለማ ተኩስ ነው	0
ይገርማል እንዴት ሰው ጥዋት ማታ ምን የአሉባልታ ውንጀላ እገሌ ላይ ልፃፍ እያለ እንዲህ ሲንዘባዘብ ይከርማል	0
እንዴት እንደዚህ የሙሉ ጊዜ ስራ ፈት ይኮናል	0
ሚኮ ይሄ ፅሁፍ ለበረራ ነበር የሚሆነው	0
ኦህዴድ በስልጣን ባልጎ ለነጮች ጥቅም ባይገዛ ኦህዴድን መምቻ መዶሻ ነው ብርሀኑ ነጋ	0
ለቁጥጥር ነው ኦህዴድ ሰውየውን የሚፈልገው ሰውየው ኢኮኖሚስት ነው	0
የኢኮኖሚክስ ማህበሩን እንዲመሰርት ነጋ ቦንገርን እንዲከፍት የረዱት አውሮፓዎች ናቸው የኦህዴድን መንግስት ለአውሮፓውያን ተቆጣጣሪ አማካሪ ነው ፕራይቬታይዜሽን ላይ የነጮች ተደራዳሪ ነው	0
ጌታቸው ሙሉቀን ሚኪ ቬሮኒካ እና ሌሎች የአምሀራኒዝም አቀንቃኞች እኔን ጨምሮ ስለአንድነት ሀይሉ ቀድመን ስላልተረዳናችሁ በጣም ይቅርታ አፉ በሉን	0
አሁን ግን በማንኛውም መልኩ ከጎናችሁ ነን ብንዘገይም ቀሪውን ጊዜ አብረን ከሰራን ህዝባችንን ከነዚህ ተኩላዎች እናድናቸዋለን	0
እንዲህ አይነት ገለጥለጥ ያሉ ፅሁፎች መውጣታቸውን ቢቀጥሉ በማር የተለወሰው የአንድነት ሀይሉን መርዝ የ	0
ሚኪየ የኛን አይከኖች ከጨዋታው እንዲወጡ የረዳነው አንተ እኔ እና ሁላችንም ነን የተበላሸውን ስማቸውን ለማደስ ምንም አልሰራንም	0
በተለይ የልደቱን ስም ለማደስ ብንረባረብ እና ወደ ፖለቲካው ቢመለስ ብርሀኑን ከጨዋታ ውጭ ያደርግል	0
ማስረጃ ሳይሆን የሚታየኝ ጭፍን ጥላቻ ነዉአንተም ፖለቲካ እንጂ ነፃ ትንታኔ አላሳየኸንም በልቡ እንዲህ ያስባል እምሮው ሌላ ነው የሚያስበውምናምን እያልህ እንደ ጠንቋይ አትንገረን	0
ብርሀኑ ነጋ እጅግ በጣም ፀረ ኢትዮጵያ ነው ወያኔ ኢትዮጵያን ከመቆጣጠሩ በፊት ብርሀኑ ነጋ ኒውዮርክ ላይ የአፍሪቃ ቀንድ ኮንፍረንስ አዘጋጅቶ ነበር	0
በዚያ የተሳተፉት ህወሀት ሻእቢያ ኦነግና ኢትዮጵያን ጠል ድርጅቶች ነበሩ	0
ያልባኝ ነገር ግን	0
ምክንያቱም አዲሲቱ ኢትዮጵያ በአብሲንያ አምሳል እነሱ እንደሚሉት ሳይሆን በገዳ አምሳል የምትሰራ ስለሚሆን በገዳ አምሳል ከተሰራች በኋላ ብሄር ተኮር ፖለቲካ ለኦሮሞ አያዋጣዉም ለምን አያዋጣውም	0
ሚኪ ይህን መረቅ የሆነ ምርጥ ትንታኔ በእንግሊዘኛም ቢፃፍና ቢሰራጭ መልካም ይመስለኛል አማራ ሆይ አብይም ሆነ ብርሀኑ ዳግማዊ ህውሀት ናቸው ላንተ ሁለቱንም እንደ ህውሀት እያቸው ብአዴን ግን ምን ተሻለን ጎበዝ ምን ይሻላል የአዴፓ ጉዳይ እልባት ካላገኘ የአማራውም ጥያቄ መልስ አያገኘም	0
ሚኪየ በሳልና አስተዋይ ነህእግዚአብሄር ለኛ ለአማሮቹ እንዳንተ አይነት በሳልና አዋቂ መሪ ይስጠን	0
ትልቁን እውነት ዘረገፍከው ልብ ያለው የአዴፓ አባላት ቢያነቡት ጥሩ ነውለነገሩ ሴራ አያውቁምለአዴፓ መረጃቸው ኢቲቪ ነው	0
የብዙ የአማራ ምሁራን ከኢትዮጵያ ወቅታዊ ፖለቲካና ከአማራ ህዝብ ህልዉና አንፃር ሲታይ ያለባቸዉ ዋና ዋና ችግሮች ብየ የማስበዉ ህዝባቸዉን የህዝባቸዉን ዉለታና አደራ መርሳት የሚፈልጉትን የሚያገኙትንና እየሆነ ያለዉን ያለመለየት በሚሰሙትና	0
በሚተገበረዉ መካካል ያለዉን ልዩነትና አንድነት ያለማስተዋል የያዙትንና ያልያዙትን ያለማወቅ ምኞትንና እዉነታን መደባለቅ በምኞት መኖር የሚጨበጠዉንና የማይጨበጠዉን መቀላቀል በሀሳብ ላይ ብቻ መንጠልጠልና አዉነታን አለማየት ከነባራዊ ሁኔታ መራቅ አካባቢን አለማሰስና አለማወቅ ነገሮችን በራስ መነፅር ብቻ ማየት የሌሎችን አስተሳሰብ እይታና አቋም አለማወቅ ነገሮችን ከጊዜ ከቦታና ሁኔታ አንፃር በአግባቡ ባለመመዘን ሚዛን መሳት ራስን ከወቅቱ ጋር ያለማዘመን ምሁራዊ ቁሞ ቀርነት በኢትዮጵያ የህልም አለም ዉስጥ መኖር ትናንትን ዛሬንና ነገን ያለመዋዠትና ያለማያያዝ የፖለቲካ አላማ ግብ ስትራቴጅና ስልት አለመለየትና መቀላቀል ወዳጅና ጎጂ…	0
የከምስራቅ አፍሪካ አልፎ በፓለቲካውም በኢኮኖሚውም የጠለቀ ግንዛቤ ያለው ባለፀጋ ወድማችን ነህ	0
አንተን ጨምሮ ማን ማነው የሚለውን ይመልሳል ስለዚህ የማን ነት የበላይነት በሽታ እንዳለብህ ያሳያል ለመሆኑ ኢትዮጵያ እኩል መሆን አለባት ትችላለችም ብሎ መስራት ምን ችግር አለው	0
ዶር ብርሀኑ ከስህተት የፀዳ ነው የሚል ደንቆሮ ትምክህት የለኝም ግን ሶስት ለህዝቦች እኩልነት ሳይሆን ለበላይነት ከሚታገሉ አክራሪ ብሄርተኞች ግን ዶር ብርሀኑ ይጠላል በአብን በኦነግ እና በህወሀት እነዚህ ሶ	0
አንተስ የሰሜኑ ፖለቲካ ዶሚናንሲ መቀጠል አለበት ብለህ ነው የምታምነው ማለት ነው	0
ዶር ብርሀኑን እንድወደው አታርገኝ እባክህ	0
ብርሀኑ ነጋ በአመለካከት ስለበለጠን መከራ እናበላዋለን የደካማ ግለሰብ መገለጫው ይህ ነው የዚህ ሁሉ ለውጥ ደግሞ የእርሱ ትግል ነው አንተማ ለፍርፋሪ ልመና ቁመሀል	0
የማይገባውን ክብር ሰጥተኸዋል ከውስጥ ሆኘ እንደማውቀው ከሆነ ብርሀኑ ያንን ያህል ተፅኖ ማሳደር የሚችል ሰው አይደለም እርግጥ እዚህ እና እዚያ ኢንጅነር ሀይሉ ሻወል ላይ ተንጠላጥሎ ያፈራቸው ሰዎች አሉ ያን ያህል ግን ያለሱ የሚሉ አይደሉም	0
አት ሳሳት ብርሀኑ ወደ ስልጣን ቢመጣ የማይፈልገው አካል ብርሀኑ አስማምቶ ሊገዛው የሚችለው አይደለም ኦሮሞዎችን መግዛት አይችልም አይችልም ብቻ ሳይሆ	0
ሄንየ አምላክ ይባርክህ በግሌ ብርሀኑ ወሳኝ የፖለቲካ ስልጣን እንዳያገኝ የቻልኩትን እሰራለሁ ይሄ መሰሪ ምን የመሰለ እሳት የላሰ ልጃችንን ከጨዋታ ውጭ እንዳደረገው እናንተም እሱን ከጨዋታ ውጭ ማድረግ አለባችሁ	0
ሰውን በሀሳብ መሞገት ጥሩ ነው ደስ ይላል ከነ ፍለጠው ቁረጠው በእጅጉ የተሻለ ነው ነገር ግን ዶር ብርሀኑ የዚህን ያህል በአማራ ጠል ፖለቲካ ያበዱ አይደሉም ያደጉበትም አካባቢ በአብዛኛው አማራ ስለንቦና ከፍ ብሎ የሚታይበት አካባቢ ነው ብሄራቸውም ቢሆን ወያኔ ስትቀጠቅጠው የከረመችው ብሄር ነው በአስተሳሰብ ደረጃ የአማራን ስለ ንቦና ይዛል ብላ ስለ ምታስብ ጉራጌን ስለዚህ ሰውዬው አንተ ባ	0
ጥቂት ነጥቦችን ብቻ ከአመክንዮ አንፃር ልጥቀስ	0
ፕር ብርሀኑ ከተማሪነቱ ጀምሮ አምራ ጨቋኝ ብሎ ተነስቷል ማለት ምን ማለት ነው ህወሀት ነበር ወይስ ኦነግ ኢህአፓ የብሄር ጭቆና ነበር ብሎ ነው የተነሳው ወይንስ የመደብ	0
ፕር ብርሀኑ የሰሜን ፓለቲካአቢሲኒያ ፓለቲካን ይጠላል በየትኛው መፅሀፉ ወይንም ንግግሩ እንዲህ አለ ማስረጃው ምንድነው ሲጀመርስ የሰሜን ፖለቲካ የሚባል ነገር አለ ሪእዮት አለም ነው ፕሮግራም ነው ህወሀት ሲያራምደው የነበረውን ነው በእውነት የሰሜን ፓለቲካ ምንድነው	0
በልቡ ያለው ነገር የአማራ ዶሚናንስ መቀነስን ነው ወላዲተ አምላክ በልቡ ያለው ተብሎ ይፃፋል በልብ ያለ ነገር ይታወቃል ይሄ አመክንዮ ከሆነ ምንድነው ታዲያ ኢ አመክንዮ	0
ፕር ብርሀኑ በአንድነቱ ውስጥ ጠንካራ አማራ እንዳይኖር ሰርቷል ጥያቄው ጠንካራ አማራ ማን ነው መልኪያውስ ምንድነው ከእኔ እና ካንተ ማንነው ጠንካራማነው ደካማ አማራ ይሁንና አንዱአለም አራጌ ፊዚስቱ ዶር አዚዝ የኖርዌው ዶር ሙሏለም ከሁሉ በላይ አንዳርጋቸውስ እንግዲህ ለሌሎች እነዚህ ናቸው ጠንካራ አማሮች አማራን በጠባብ ደረት ሳይወስኑ ቀደምት አባቶቻቸው ለአንድነቷ እንደተዋደቁት በተግባር እየተዋደቁ ያሉት	0
ከአበበ ገላውና ምናላቸው ስማቸው አይስማማም	0
ሲደባደቡ ታዩ ሲዘላለፉ ተሰማ እንኪያስ ሙሉቀን ተስፋው አማራን ስለማይወድ ነዋ ከጌታቸው ሽፈራው ጋር የተዋረፈው	0
ልደቱ እና ይልቃል ከሆኑ የጠንካራ አማራ መገለጫ እንግዲህ ምን ይባላልማለት የሚቻለው የሚኪ አማራ ትልቁ ተምሳሌት ልደቱ ነው ማለት ነው	0
ለእኔ የነ ሚኪ አማራ እና መሰሎቹ ዘመቻ ግልፅ ነው እረኛው ሲመታ በጎቹ ይበተናሉ ነው	0
ነገር ግን እስከሚገባኝ የሚመታ እረኛም የሚበተን መንጋም የለም	0
ጉዳዩ ከሰዎቹ አይደለም ከኢትትዮጵያ ነው	0
ግሩም ትንታኔ ነውይሄንን አሰላለፍ ሰብሮ የአማራው ፖለቲካ ገዝፎ የሚወጣበትን መንገድ ከዚህ ትንታኔ አኳያ መቀልበሻውን ማርከሻውን እንጠብቃለን	0
በዚህ ወቅት የአንድነት ሀይል ነኝ የሚለዉ ሀሳዊ አካል የዎቹን የአማራ ብሄራዊ ጭቆና የአማራ ገዥ መደብ የአማራ ቅኝ ገዥ ኢትዮጵያ የብሄር ብሄረሰቦች አስርቤት የሚሉትን የጥላቻ የቅናት የስሜትና የሀሰት ትርክት ስላላስተባበለና ለደረሰዉም ጥፋት ይቅርታ ስላልጠየቀ አማራ በኢትዮጵያ ፖለቲካ በቁመቱና በወርዱ ልክ እንዳይሳተፍና እንዳይወከል እያሴረ ስለሆነ በኢትዮጵያ ሁሉም ዜጎችና ብሄሮች እኩልነት ነፃነት ፍትህና ዴሞክራሲ ተጠቃሚ እንዳይሆኑ እያሴረ በመሆኑ	0
እዉነትን በመደበቅና ባለመናገር የአማራና የኢትዮጵያ ህዝብ ራሱን ከጥቃት እንዳይከላከል እያዘናጋ ስለሆነ በእዉነት ላይ ተመስርተዉ ለአማራና ለኢትዮጵያ ህዝብ የሚታገሉትን እንደ አብን የመሳሰሉ የፖለቲካ ጅርጅቶችን በሴራ ተጠልፈዉ እንዲወድቁ እየሰራ ስለሆነ የአማራ ህዝብ በአማራነቱ ተደራጅቶ ህልዉናዉን እንዳይጠብቅና እንዳያስጠብቅ እያሳሳተና በጎጥ እየከፋፈለ ስለሆነ አላማ መርህ አጀንዳና አቋም የሌለዉ ስለሆነ በዚህም የኢትዮጵያን የለዉጥ ጅምር እየጠላለፈና እያምታታ ስለሆነ በአጠቃላይ በኢትዮጵያ ዉስጥ እዉነተኛ ለዉጥ አስተማማኝና ዘላቂነት ያለዉ ስርአት እንዳይዘረጋ በማሴር የአማራን የኢትዮጵያን ዜጎችና ብሄሮች ለመከራ እያዘጋጀ …	0
የብሄራዊ እርቅና መግባባት ኮሚሽን ስራዉ ዉጤታማ መሆን ካለበት የዎቹ ትዉልድ ያቀነቀነዉ የአማራ ብሄራዊ ጭቆና የአማራ ገዥ መደብ የአማራ ቅኝ ገዥ ኢትዮጵያ የብሄር ብሄረሰቦች እስር ቤት ወዘተ የሚሉ የኢትዮጵያና የአማራ ጠላቶች ቀናተኞችና ስሜተኞች የፈጠሩት የሀሰት ትርክት በአማራ ህዝብ ላይ ያደረሰዉ የጠላትነት ስሜት በኢትዮጵያና በኢትዮጵያ ህዝብ ላይ ያደረሰዉ የፖለቲካ የኢኮኖሚና ማህበራዊ ምስቅልቅል በዚህ የሀሰትና ጥራዝነጠቅ ትርክት መነሻነት የተዋቀረዉ የብሄር ህገመንግስትና የብሄር ፌደራሊዝም ያስከተለዉ ጥፋት ወዘተ በደምብ መታየት አለበት	0
በእኔ እምነት የሀገሪቷ ቁልፍና መሰረታዊ ችግር ይህ በጠላትነት በቅናትና በስሜት የተፈጠረ የሀሰትና ሳይንሳዊ ያለሆነ ትርክት ነዉ ብየ አምናለሁ መፍትሄዉ ያለዉም እዚህ ላይ ነዉ	0
የማንነትና የወሰን ኮሚሽንም ይህን ጉዳይ በደንብ ማየት አለበት ብየ አምናለሁ ይህን መሰረታዊ ስትራቴጃዊና የህልዉና ጉዳይ አድበስብሶ ለማለፍ መሞከር ሀገሪቷን የማትወጣዉ ቀዉስ ዉስጥ ሊከታት ይችላል	0
አሁን ባለው አካሄድ ዶር ብርሀኑ መሪ ሊሆን የሚችልበት መንገድ የለውም	0
የመንግስትን ስልጣን ሳይዝ መሪ ሊሆን አይችልም መንግስት ለመሆን ፓርላማውን ከግማሽ በላይ መያዝ ወይም ከሌላ ፓርቲ ጋር ጥምር መፍጠር ይኖርበታል ይህ ደግሞ ከባድ ነው ስለዚህ የብርሀኑ የመሪነት ተስፋ ሩቅ ነው	0
ብራቮ ሚኪ የብርሀኑን መሰሪ አላማ ማንነቱንና ምንነቱን ቅልብጭ ባለ መልኩ አቅርበህዋል እሄ ላንቀላፉና በቃላት ጋጋታ እየተነዱ ወደ እርሱ ጎራ ለሚገቡት አማሮች ማንቂያ አስቀድመው ለነቁት ደግሞ የበለጠ ማነቃቂያ መልእክት ነው	0
ስለሆነም እኛ ማድረግ ያለብን በነብርሀኑ ተወግዘው በአማራውም እንዲጠሉ የተደረጉትን የአማራ ልሂቃንና ፖለቲከኞች እንደ ልደቱ አይነቶቹን በይቅርታ እንዲመለሱ ማድረግ	0
ታድያ ሰሜኖቹ እርስበርስ ለምን እንናቆራለን አይደለም ለሺህ ዘመናት ደስታውና ሀዘኑ አብሮ ሲጋራራ ጠብቆ ይነበብ ለምን በኤሊቱ እና ፖለቲከኛው ይገፋፋል	0
ሰሜኖቹ እርስ_በርስ ካልተባላ ስልጣን ወደ ደቡቦቹ አይሄድምና ሚኪ እንዲህ አይነት ዱአን የምያሳምር ፅሁፍ ስትፅፍ የመፍትሄ አቅጣጫውንም ብታስቀምጥልን ሸጋ ነበር አመሰግናለሁ ከእውቀት እውቀት ይጨምርልህ	0
ሰዉየዉን በትክክል ስለገለፅከዉ ከልቤ አመሰግኛለሁ ድሮም ከዎቹ ፖለቲከኞች ስለኢያ አንድነት ከልቡ የሚሰራ መሪ እንደማይኖር እርግጠኛ ነኝ ስለዚህ በፌደራል ደረጃ አማራዉ እኩል ተጋሪ እንዲኖረን ከተፈለገ አብን ጠንክሮ መስራት ይኖርበታል አዴፖም ጠላቱንና ወዳጁን መለየበት ቢስችል ምኞቴ ነዉ	0
እሽ እንመን እና ዶር ብርሀኑ ይህንን ሁሉ እየሰራ አዴፓ ግን የራሱንና የሚመራውን ህዝብ አቅም ለመገንባትና ብቃቱን በክልል በአገርና በአለም መድረክ ለማሳየት ምን እየሰራ ነው ሌሎች የሚያስቡትን እና የሚሰሩትን መተንተን ብቻውን የራስን የቤት ስራ መስራት አይሆንም በመጨረሻ ሜሪት እና የፖለቲካ ኢኮኖሚ እና ማህበራዊ አቅም ነው የእያንዳንዱን ብሄር ድርሻ የሚወስነው ብየ አምናለሁ	0
ማይኮ ተባረክ ሰሚ አጥቸ እንጅ በፊት ተናግሪያለው ስለዚህ ክፉ አስመሳይ ዱርየ ዘሀበሻ እንዲዘግበው ደግመህ ፓስተው እንዳለው በረራ ላይም ይታተም ሁሉም ይወቀው እሄን ተላላኪ	0
ሚኪ አከብርሀለሁ ምን አለበት በአካል ሳይሆን በመንፈስ በአዴፓ ስብሰባ እየተገኘህ ይህን የደነዘዘ ግሩፕ ብተሞርድልን በዚህ ወርቅና በሳል አስተሳሰብህ	0
አብኖችን በተገኘዉ መንገድ ሁሉ በማገዝ የዚህ መከረኛ አማራ ህዝብን ከሚሸረብበት ሴራ መታደግ ቢቻል	0
እኛ አማራ በአንተ ጥብት ውስጥ አንደበቅም አሳፋሪ መሆንሀን የሚያሳየው ልደቱ መጥራት ከወያኔ ጋር ሲሰራ የነበረ ዘረኛ ከሆንክ ሁሌም ሳታውቀው ወያኔ ወያኔ ትሸታለህ ኦነግ አረና አብን የመጀመሪየው ፊደል ገርማኛለች በዚች ፊደል ምርምር እያደረኩ ነው ግን ለኦነግ አብን መኖሩን እደግፉለሁ እሾክን በእሾክ አንዳዴ ይሰራል	0
እረባካችሁ የደህና ሰው ስም አታጥፉ ዶር ብርሀኑ ምርጥ ሰውነው ነገር አትጎንጉኑ አንዱን ሳትጨርሱ አንዱን አትልከፉ ወሬ ማብዛቱን ትታችሁ ፊታችሁን ወደ አማራ ጠላቶች አዙሩ ንፅህ ሰው አትወንጅሉ	0
ለምንድነው ግን ወሎን አማራ የምትለው አማራ ነኝ ወይም ሰሜን ነኝ ያለ ለኢትዮጵያም ለወሎም መልካም አደሉም አጣቃላይ የሰሜን ሰወች ለዚች አገር ውድቀት ብቻ ሳይሆንወድቃም እዳትነሳ ያረጋት በዋናነት አማራ ወይም የሰሜኑ ጋጠወጥና ጨካኝ ወራሪወች ናቸው	0
ሰሜኖች ስልጣና ከይዙ ካሁን በኋላ ምንም መልካም አይሆንም	0
አብሽር ሚኪ እያንዳንዷ የፖለቲካ ጉዳይ በ አስራት ቲቪ ትተነተናለች ትፈተፈታለች	0
አስቀድመን ግን አቶ ልደቱ ይቅረብና ብሬን ጉዷን ዘርገፍገፍ ያደርግልናል ከዛ ደሞ ብአዴንን እራሱን እየጋበዙ ትንሽ ወንደነትን ማጠጣት ነዉ አስራት ሚዲያ እንኳን ደህና መጣሽ	0
ኦህዴድ በስልጣን ባልጎ ለነጮች ጥቅም አልገዛ ቢል ኦህዴድን መምቻ መዶሻ ነው ብርሀኑ ነጋ	0
ለአውሮፓውያን ታዛቢነት ነው ኦህዴድ ሰውየውን የሚፈልገው	0
ሰውየው ኢኮኖሚስት ነው የኢኮኖሚክስ ማህበሩን እንዲመሰርት ነጋ ቦንገርን እንዲከፍት የረዱት አውሮፓዎች ናቸው የኦህዴድን መንግስት ለአውሮፓውያን የሚቆጣጠር አማካሪ ነው ብርሀኑ ፕራይቬታይዜሽን ላይ የነጮች ተደራዳሪ ነው	0
ህ ትንታኔ ልክ በየቦታው እግር ኳስን በገባቸው ልክ እንደሚተነትኑት ነው	0
ወንድሜ እድሜህን ያርዝመው በእውነቱ ከፍተኛ የግ አመራር የሆነ አማራና የለም እንጅ በዶር ብሀኑ የስስት አካሄድ አንጀቱ የተቃጠለ ሰው የፃፈው ነው የሚመስለው	0
ትክክለኛውን የብርሀኑን ባህሪ እንደዚህ ፍንትው ብሎ ሲታይ ለብዙ በአንድነት ስም ለደነዘዙ አማሮች ጠቃሚ ነው	0
በጣም ከሚያንገበግበው ነገር አንዱ ከኦሮሞና ሌሎች የብሄር ድርጅቶች ጋራ አየሰራ አማራን ግን ወሎ ሸዋ ጎንደር ጎጃም እያለ መከፋፈሉ ነው	0
በጎህ በኩል ጎንደር ክልል ይሁን የሚል ጉዳይ ትናንት አንስቷል አአ በኦነግ ስትወረርና ስንቱ ደጋፊዎቹ በገፍ ሲታሰሩ ትንፍሽ ያላለው ለካስ አጅሬ ጉዳዪ ወደዚህ ሆኖበት ነው	0
በብዙ ሀሳቦችህ እስማማለሁ ነገር ግን የዶር ብርሀኑ ለኦዴፓ ያለው ሊሆን ይችላል ኦዴፓዎች ግን ወደ ታክታል ደረጃ አውርዶት የሚንቀሳቀሱት	0
መሪ የመሆን ለብርሀኑ የሰጠውን ቦታ አሁን ባለው ከባባዊ የፖለቲካ ሁኔታ የንተ ፅሁፍ ግነት ሆነብኝ አሁን ባለው ነባራዊ ሁኔታ የትኛውም የኦሮሞ የፖለቲካ ኢሊት በኢትዮጵያ አንድነት የሚደራደር የለም እዚህም ትንሽ ስተሀል	0
ይህ ሲታወቅ ታዲያ አማራ በአማራነቱ ለምን ጠንክሮ አይሰራም የምን ወሎ ሸዋ ጎጃም ጎንደርና ደቡብ ነው አንድ አማራ ለሁሉም አማራ የሚለውን ህልም መፍታታት ያለበት እራሱ አማራው ነው እናንተ እያላችሁ ወደኋላ የለም	0
የኔ ግዮናዊ ብዙ ርእሰ ሀሳቦችን በስፋት ዳሰሀል ስለዚህ የልቡን ሲነግሩት የኮረኮሩን ያክል ይስቃል ይባላል ስለ ዶር ብርሀኑ አዉቃለሁ ማለቴ አይደለምዶክተርን በ የአአበባ ከንቲባ ሆኖ መመረጡን ብቻ ነዉ የማዉቀዉ	0
እና ዛሬስ ምን እናድርግ የሚል ጥያቄ ከተነሳ እንደተባለዉ አብን አዎ በወጣቶች የተገነባ ነዉ ምንም ማድረግ አይቻልም ይታደሉታል እንጅ አይታገሉትምአማራ የኢትዮጵያ	0
ሚኪ አማራ ፖስት ከምታደርገው መገንዘብ የሚቻለው ሁለት ችግሮች አሉብህአንደኛ የተገረፈ ሰው አይነት በፍራቻ መራድ መንቀጥቀጥ ይህ ደግሞ ደም ግፊት እንዳይደፋሁለተኛው የአማራ የበላይነት ይጠላል ትላለህ በእኩልነት አታምንም እንዴ በእኩልነት ካላመንክሲያምርህ ይቀራል የበላይነት አታገኝም በሌላ ጊዜ ደግሞ ከአማራ ናከአዲስ አበባ ህዝብ ጋር ልታጣ	0
ለብርሀኑ ትልቅ ቦታ የስጠህው ይመስለኛል ይህ እንደሂሳብ አራትና አራት የምትለው ስሌት በማህበራዊው ሳይንስ ውስጥ እጅግ እጅግ በአነስተኛ ግምት ካልሆነ አይስራም	0
የህብረተ ስብ ዳይናሚዝም እንቅስቃሴ ወሳኝነት አለው ህብረተ ስብ እንደ ድንጋይ አይደለም ድንጋይም በጊዜ ሀደት ቅርፅን ይለውጣል ዶር ብርሀኑ በእርግጥ ፀረ _አማራ ለመሆኑ ግ በሚባለው ልሳኑ አማራን ከስልጣን አካባቢ	0
ወሬ ወሬ አሳዩን ተግባሩን	0
ፕሮፌሰር ብርሀኑ ነጋ እስካሁን ድረስ በኢትዮጵያ ውጥንቅጥ ፖለቲካ ውስጥ ያላቸው ሚና ሚዛናዊ በሆነ መንገድ የሰሜን እና የደቡብ ትርክቶችነን በማስተናገድ እና በማጋመመድ ላይ ያጠነጠነ ነወ	0
የፕሮፌሰሩ ፖለቲካዊ አመለካከት አርቆ በሚያስብ እና ራእይ ባለው ትልቅ ስትራቴጂ ላይ የተመሰረተ ነው ይህ ባለ ራእይ እና ትልቁን	0
ሚኪ ብዙ ፅሁፎችህን አነባለሁ ብዙ ቁምነገርም አገኝቼበታለሁ በርካታ ሀቆችንም አግኝቼበት ስለነበር ይህ ፅሁፍ ያንተ አልመስል እያለኝ ነው ከታሪክ ይማሩበታል እንጂ አንኖርበትም የትላንት መጥፎ ዛሬ ጥሩ አይሆንም ማለት አይደለም አንተ በልጅነትህ ለሰራህው ጥፋት ዛሬ ልቅጣህ ብልህ ትቀበለኛለህ ከታሪክ መልካሙን ወስደን መጥፎውን ትተን ካልሆነ ከጎረቤታችንም ጋር መኖር አስቸጋሪ ስለሚሆነ በትላት ከምንጣ	0
ሚኪ አማራ በጣም ማራኪ አገላለፅ ነው እውነትና ትክክለኛ ሀሳብ ነው	0
አሁን ጥያቄው አማራ እንደት ከዚህ ዝቅጠት ወጥቶ ጠንካራ ማዲረግ ይቻላልይህን ነገር በጥናት በታገዘ ስትራቴጅክ አጋር ፈልጎ ጠንካራ የአቢሲያን ፖእቲካ እንደገና መገንባት ያስፈላግ ቢታሰብበት መልካም ነው	0
ብሄር ተደራጅቶ ምን ተገኘ ይህው ለኦሮሞ የቆሙ ተብየዎች ድሮም ዘንድሮም አሸባሪ ብሬ ሁሌም ኢትዬጵያን የሁላችንም ትልቅ ሀገር ለመገንባት የሚጥር ባለ ምጡቅ አእምሮ ነው እነ አብን ተብየዎች ወሬ ብቻ	0
ተፃፈ እና ተሞተ አሉ እንደዚህ ያስባል እንደዛ ያስባል ከማለት ውጪ እንዲህ አልያም እንዱያ አድርጓል ለማለት አልቻልክም በዚህ ሁሉ ዝባዝንኬ ውስጥ አንድም እውነት እውነት የሚሸት ነገር የለበትም ከጭፍን ጥላቻ በስተቀር	0
በቃ ሀቁ ይኸው ነውከዚህ በተረፈ ምንም ማለት አይቻልም የረቀቀ እጅግ በእውነታ ላይ የተመረኮዘ ሀሳብ ነውዘርህ ይብዛ ሚኪ የእኛ ጀግና	0
አማራ አስብ እንደገና አስብ አሁንም አስብ ልትቀበር ነው አሁንምሌላ አመት ደግሞ ሊገሉህ ሊአሳድዱህ ነው	0
ይህን ሲያደርግ ግን አናይም ተወደደም ተጠላም የአዲስ አበባ ህዝብ ፈተናው ሲበዛበት ወደ ብሄር መግባቱ አይቀርም ያኔ ግምቦቴ ያከትምለታል ማለት ነው ለአዲስ ያለሆነ የዜግነት ፓለቲካ ለየትኛውም አይሆንም	0
አሁን ኢትዮጵያ ያላት አማራጭ የአንድነት ፓለቲካ የበላይነቱን እንዲይዝ መስራት ነው እባካችሁ አስተውሉ በቢሄራዊ የፓለቲካ መስመር የሚያምኑ መሪወች በአንድ እንዲሰባሰቡ ማድረግ ይሻላል የጎበጠ ካለ እንዲቃና እናድርግ ሞራል ባንነካ ጥሩ ነው አገሪቱ ብዙ ስራ መስራት ይጠበቅባታል የቢሄር ፓለቲካ ውጤቱን አይተናል አንድ የፓለቲካ ፓርቲ ስልጣን ሲይዝ ግለሰቡ የሚገኘውን ጥቅም በማስላት እምንደግፍና	0
የብሄር ፖለቲካ እርስ በርስ እንድንጠላለፍ ያደርገናል አለ	0
ውይ እንዴት ይገርማል አብኖች	0
ፖስት አድራጊውም ኮመንት ፃፊውም ተነጋግራችሁ ነው ወይስ በአጋጣሚ አጋጣሚ ሳይሆን አንዳችን እንፖስት ሌላችን ኮመንት እንፃፍ ግን እውነት ብርሀኑ ነጋ አማራ ጠል ነው ከሆነም ትችት የሚቀርብበት በአብን ብቻ መሆኑ ቆም ብየ እንዳስብ አድርጎኛል አናማ ስልጣን ፈላጊና አማራ ጠል ሆናችሁ ያገኘሗችሁ እናንተ ናችሁ ለምንብየ ስጠይቅ በጎንደር ላይ በደረሰው ጥፋት እን	0
እህት ሜሮን ኮመንት በማድረግ ያሰብኩትን ቀደማ ገለፀችው እንጂ እጂግ የሚጣፍጥ በአልሚ ምግብ የተሞላ ቁርስ ነው ያበላኸን	0
አንጀት አርስ የሆነ ሀቅን የተመረኮዘ እይታዊ ትንታኔ ነው የማስበውን ግን መረጃና ቃላት የሚያጥረኝን ነገር ነው የተረተርከው በሰውየው ጭንቅላት ውስጥ ገብተህ ውስጠአካሉን በደንብ ፈትሸህ የወጣህ ነው እኮ ምትመስለው አትቀየመኝና አንተ	0
በጣም እናመሰግናለን ይሄ ሁሉ ስለተረዳኸው እሱ ከህዝብጋ ጋር እንጂ ከወንበዴጋር የሚያወራበት የሚሰራበት ጊዜ የለውም እኔምልህ ግን አንተአማራ ልትሆን ትችላለህ ኦሮሞነኝ ትግሬነኝ ወላይታ ነኝ እንደው ባጠቃላይ ኢትዮጱያዊ ነኝ ብትል መሬቱ በላይላይህ ሚገለበጥ ይመስልሀል አይዞህ የበሽተኛ ሁሉ መዳኒቱ ብርሀኑን መከተል ነው እሺ	0
ለዚህ መፍትሄ አዴፓና ህወሀት ጠላትነታቸዉን አቁመዉ በአንድነት መስራት አለባቸዉ ጃዋር በሄደበት እኛ ኩሽ ነን በማለት ድጋፍ ለማግኘት እየሞከረ ነዉ ሰሜኑም አማራና ትግሬዉም አንድላይ መስራት አለበት ያለበለዚያ ጢባ ጢቤ ነዉ የሚጫወቱብን ጎበዝ	0
ብርሀኑ ነጋ ለአላማው ማሳኪያ የሚውል ረብጣ ገንዘብም ተሸክሟል ወሎን ክልል እናደርጋለን ብሎ ደሴ ላይ ሴራውን እየጎነጎነ ያለው የእነ መንግስቱ ዘገየ ቡድን በእነ ብርሀኑ ነጋ የሚደገፍ ነው	0
የ ኢትዮጵያዊ አንድነት አቀንቃኞች ሰው ከመተንኮስ ባለፈ አንድ ቁምነገር ሲሰሩ አላየንም	0
የኦሮሞውምየአማራውም የሌላውም ኢትዮጵያዊ ጥያቄ ሁሉ በአጭር ጊዜ ይመለስ ነበረ	0
ሁሉም ጠግቦ በልቶ የሚያድርብሽተምሮ የሚለወጥብሽአሳዳጅና ተሳዳጅ የማይኖርብሽ ትሆኝ ነበረየፈረቃ ፖለቲካና ስልጣን ይውደም	0
ለአዲሱ የአማራ መሪ ለዶር አምባቸዉ መኮነን አንድ ሁለት ነገር ብላቸዉ ደስ ይለኛል በባለፉት ብዙ አመታት እና በተለይም ደግሞ ከባለፉት ሁለት አመታት ወዲህ የአማራ ህዝብ በብዙ ዉጣ ዉረዶች ያለፈ ነዉ	0
በህዝቡ ዉስጥ ተስፋ የመቁረጥ ችግሮቹን እንዲፈቱለት አሻግሮ ሌሎችን የመጠየቅ ብሎም የማድረግ እና አጠቃላይ የተሞላበት እንቅስቃሴ በዛ ብሎበት ሰንብቷል	0
አሁን የሚያስፈልገዉ ይሄን የከረመብንን የቁዘማ እና ብሎም የ ወደ በመቀየር እና ለህዝቡ በማሳየት የህዝቡን ተስፋ የሚያለመለም ሊደርሽፕ ነዉ	0
በመሆኑም ወደ ጥቃቅን የማኔጅመነት ስራ ዘዉ ብሎ ከመግባት ይልቅ ትልልቅ እና አዳዲስ የሆኑ ሀሳቦችን እንዲሁም ፕሮጀክቶችን በመጀመር እና በማስተዋወቅ ወጣቱን እና ህዝቡን ማንቀሳቀስ ይቻላል አሁን ላይ ህዝቡ ያጣዉ ነዉ	0
ስለዚህም ዶር አምባቸዉ ይሄን ነገር ትኩረት ሰቶበት ጥቃቅን ችግሮችን ለመቅረፍ ጊዜ ከመስጠት ይልቅ ወደ ትልልቅ አጀንዳወች የፖለቲካ ትርክትን የሚያስቀይሩ አጀንዳወች ላይ ማተኮር ጥሩ ነዉ	0
በተለይም ኢኮኖሚዉ አንድ ሊባል ይገባል አሁን ሁሉም ፖለቲካዉ ላይ ይረባረባል ነገር ግን እጅግ ብዙ ህዝብ በድህነት ዉስጥ ይኖራል ብዙዉ ወጣት ስራ የለዉም ብዙ የተፈናቀለ ህዝብ አለ	0
ይህ ኢኮኖሚያዊ ሁኔታ ከፖለቲካዉ እኩል አለያም በልጦ መታየት አለበት ስለዚህም ትልልቅ ኢኮኖሚያዊ ፕሮጀክቶችን መቅረፅ ያስፈልጋል አዳዲስ ፖለቲሲዎች እና የፋይናንስ አቅርቦት ያስፈልጋል	0
ፕሬዝደንቱ በሀገራችን ደቡቡ ክፍል አካባቢ ብቻ የሚታየዉን ኢኮኖሚያዊ እና የንግድ እንቅስቃሴ ወደ ሰሜኑ በኩልም የሚዳረስበትን ፕሮጀከት መቅረፅ አለባቸዉ	0
ከአፋር ክልላዊ መንግስት ጋር በመተባበር በትቂት መቶ ኪሎ ሜትሮች እርቀት የሚገኘዉን የጅቡቲን መስመር የአፋርን እና የአማራን ህዝብ የሚጠቅምበትን መንገድ መቀየስ	0
ከጅቡቲ በአፋር ኮምቦልቻደሴ የሚደርሰዉን መንገድ በጋራ በማልማት አዲስ አበባ ላይ ብቻ የተጠራቀመዉን ንግድ ወደዚሁ አካባቢ ማድረግም ያስፈልጋል	0
ከኤርትራአሰብ ተነስቶ ወደ አዲስ የሚሄዴዉ መስመር በእያንዳንዷ ኪሎ ሜትር ላይ ኢኮኖሚዊ ጥቅም እንዲያስገኝ አድርጎ ማበጀት ተገቢ ነዉከዛም ባለፈ የአማራ ክልልን እና የአፋር ክልልን የቱሪዝም መዳረሻ በማስተሳሰር የጋራ ተጠቃሚ መሆን ይቻላል ለምሳሌ	0
ለምሳሌ የአዋሽ ፓርክ ከእነ አንጓለለ አንኮበር እና መሰል የሰሜን ሸዋ የቱሪስት መዳረሻወች ጋር በማስተሳሰር የአካባቢዉን እንቅስቃሴ ማሳደግ ይቻላል	0
በምእራቡ በኩል ከሱዳን ጋር የጋራ ወታደር ማስፈር የሚለዉ ጠቃሚ አይደለም ጠቃሚዉ ነገር ደንበሩን ቶሎ አስምሮ አካባቢዉን የንግድ ቀጠና ማድረግ ነዉ ያ አካባቢ ሆን ተብሎ አማራን እንዳይጠቅም ከረዥም ጊዜ ጀምሮ አደገኛ ቀጠና እንዲሆን የተሰራበት ነዉ	0
ደንበሩን በሰጥቶ መቀበል መርህ ቶሎ ማስመር እና ታላቅ የኢኮኖሚ ኮሪደር ማድረግ ነዉ እዛ አካባቢ የሚነሳ የንግድ መስመር ግብፅ ካይሮ ድርስ አልፎም አዉሮፓ የሚደርስ ነዉ	0
በሁመራ ጎንደር መስመር በኩል ያለዉም እንዲሁ ሌላኘዉ የንግድ ኮሪደር ነዉ	0
ከቤንሻንጉል ክልል በተለይም መተከልን በመሰረተ ልማት ሙሉ ለሙሉ ከአማራ ጋር በማገናኘት እዛ አካባቢ ወጣቱ እና ባለሀብቱ ኢንቨስት እንዲያደርግ ማድረግ ነዉ መተከልን በባህርዳርአቸፈርፓዊ በኩል አንድ መንገድ	0
በጎንደር ቋራድባጤ በኩል ሌላ መንገድ እንዲሁም በቻግኒግልገል በለስፓዊ ያለዉን መንገድ በማሳደግ አካባቢዉን ሌላ ብዙም ነገር ሳያስፈልግ በዚህ መልኩ የህዝብ እንቅስቃሴዉን በመጨመር ተጠቃሚነቱን ማሳደግ ይቻላል	0
ግድቡ ሲያልቅም በተለይም በቋራ በኩል ያለዉ መንገድ በቅርብ እርቀት ስለሚያያይዘዉ አልጣሽ ፓርክን እና ግድቡን በማያያዝ የቱሪዝም መዳረሻ ያደርገዋል ከግድቡ የአሳ ምርት እና መሰል ጉዳዮችንም የአማራ ህዝብ የሚጠቀምበት መንገድ ይሆናል ማለት ነዉ	0
የአማራ ህዝብ እንዳይጠቀም ተብሎ ጫፍ ላይ ቢወዘፍም በዚህ መንገድ ግን ተጠቃሚ መሆን እንችላለንቡሬ እና ወለጋን በጥሩ የመንገድ መሰረተ ልማት በማያያዝ እዛም ላይ ሌላ ሰፊ የኢኮኖሚክ ኮሪደር ማበጀት ይቻላል	0
ህዝቡን በማስተሳሰር አንድነትን በማጎልበት ከየትም አቅጣጫ የሚመጣ ትንኮሳን እና ጫናን በጋራ የሚከላከል እንዲሆን ማድረግ አስፈላጊ ነዉ	0
ከጎረቤት ክልሎች እና ሀገሮች ጋር ጉብኝት በማድረግ የኢኮኖሚያዊ እና ማህበራዊ ትስስርን ማሳደግ አንዱ ስራ መሆን አለበትለምሳሌ ያህል ነዉ የኢኮኖሚያዊ ሁኔታወችን ጠቅስ ጠቅስ ያደረኩት እንጅ ሌሎች ብዙ ታላላቅ ፖለቲካዊ አጀንዳወችም እንዳሉ አልረሳሁም ግን ፖለተካዊ ጉዳዮች ያዉ ይታወቃሉ	0
ሚኪ አንተስ ብለህ ነበር ግን ብአዴን እዚህ ድረስ የማየት አቅም አለው ወይብአዴን ሩቅ የማየት ችግር ተጠቂ እኮ ነው	0
ወንድሜ ሚኪ የአማራውን ፖለቲካ ከምጣኔ አኳያ የምታይበት እይታህ እጅግ ጥልቅ የተጠናና መሰረታዊ የሚባሉ ናቸው	0
እኔ ሁሌም ሚኪ አማራን የምልህ አንተና የተወሰኑ ግለሰቦች በጥልቀት እንደተረዱት የአንድ ማህበረሰብ ሁለተናዊ ልእልና	0
በትክክል ግን ሰውየው እንቅልፋም ብአዴን ነው ምንም ይፈጥራል ብየ አላስብም	0
አዲስ አበባ የሸዋ ናት	0
ጠዋት ላይ ኦዲፒን ወይም ኦሮሞን ጥገኝነት ያበዛል ስትል የራሷ እያረረ በሰው ትስቃለች ስል ቆይቼ መልሰህ ከ በሀላ አማራ ተስፋ ቆርጣል ችግሮችን ሌሎች እንዲፈቱለት ይፈልጋል ብለህ ቁጭ እረ እናንተ ሰዎች ሰው ምን ይለናል በሉ	0
ይህ ፁሁፍ ቀጥታ በፅ ቤታቸው መድረስ አለበት ሌላው ደሞ አልጣሽ ፓርክን በተጠናከረ መልኩ እንዲቀጥልና የተጋረጡበትን ችግሮች አስወግዶ ለቱሪዝም ማመቻቸት በጣም ጠቃሚነው	0
እርግጠኛ ነኝ ከኛ ከአዴፓ ባለስልጣኖች አንዱ መሆን አለብህእያንዳንዷን ሚስጥርእያንዳንዷን ችግር ከነመፍትሄው እኮ ቁልጭ አድርጐ ያቀዋልግን ንጉሱ ጥላሁን ነህ አደል በናትህ ንገረኝለማንኛውም ውስጤ ነህ ዘመዴ	0
የተማሩ ኦሮሞዎች እንዲህ እያሉህ ነው ሌላም ካስፈለገ ይጨመራል ታሪክን ማወቅ ጥሩ ነው አዲሰ አበባ የማን መሆኗን መረዳትም ጥሩ ነው የሚኒሊክ አገር መሆኗን አለመርሳትም ጥሩ ነው ኦነግ የሳለልህን ካርታ ይዞ መዝለል ፈፅሞ እንደማያዋጣህ ማወቅም በጣም ጥሩ ነውና ተረጋጋ	0
ሚኪ አምሀራ በዚህ ፊብሪካ ዙሪያ ተቃዎሞአችሁን ፅፋችሁ ለህዝብ አሳዩ የክልል ጉዳይ አይደለም ቸግሩ የሀገር ነው ስንት የሚከፈት ፋብሪካ እያለ የስራ እድል እንፈጥራለን እያሉ ህዝቡ በሱስ ተጠምዶ ሊውል ነው ከጫት የባሰ ነው የዚህ እፅ ጉዳት	0
ሀሳቡ ጥሩ ነው ግን እንዲህ አይነት ፕሮጀክት የሚታሰበው መጀመሪያ ከደህነት በፊት መኖርን ነው መኖር ስንል ሀብት መኖር ወይ አለመራብ አይደለም	0
መኖር ብዙ ቅድመ ነገሮች አሉት ከኢኮኖሚ በፊት	0
በምድሬ ላይ የመኖር መብቴ	0
የመናገር መብቴ አልጠቅሰውም ብዙ ነገር አለ ወዘተ	0
አማራ ክልል ደሀ አይደለም ተወርሶ ሁለተኛ ዜጋ ሆነ እንጂ መጀመሪያ ለደህነት ዳጋ ያደረገው ወያኔ በተመሳሳዩም ቀጠለበት አዲሱ መንግስት እና ያንተ ሀሳብ አይከፋም ግን ፕሮሪቲ ፍትህ ለአማራ ህዝብ በሀገሩ እንደስደተኛ ለተቆጠረው	0
ስከፍት በመጀመሪያ ማንበብ የምፈልገው ምርጥ ፀሀፊ ምርጥ ተንታኝ ምርጥ ኢኮኖሚስት ምርጥ አንባቢ ብቻ እረጅም እድሜ እመኝልሀለሁ ብዘገይም መልካም ልደት	0
አዴፓ እድለኛ ነው እንዲህ አይነት ሪያሊስቲክመሬት ላይ ሊወርድ የሚችል የፓሊሲ ምክረ ሀሳብ በነፃ እንካችሁ ይባላል ዶር አምባቸው በዚያች ቡኒ ከትቦ እንደሚይዛቸው ተስፋ አደርጋለሁ	0
ሚኪ የምር ለመናገር በእኔ አንደበት የማድነቅ ሞራሉ የለኝምምክንያቱም መሬት ላይ ሆኜ ሰማይ ላይ ያሉ ስነፈጠረታትን በቀን ተመልክቶ የመለዬት ያህል ይከበደኛል	0
ግን ኢኮኖሚውንስ በትምህርት አመጣኸው እንበል ግን ስትራቴጂክ የሆኑ የኢኮኖሚ ጂኦግራፊዎችንና ማእከሎችን ምን ቢሰራባቸው አዋጭ እንደሆ መለዬት መቻልህ ግን ከምንም በላይ ያስገርማልያስደንቃልምመንግስት ግን ምን አለ አማካሪው ቢያደርግህና የአገራችን የኢኮኖሚ ችግር መንጥቀህ ብትጥልልን	0
ሚኪ ልዩ ፍጥረት	0
ጥሩ ሀሳብ ነዉ አክቲቪስት ማለት የህዝብ ድምፅ ብቻ መሆን ሳይሆን ሁሉን አቀፍ ተሳታፊ በመሆን ለመሪዎቻችን ያላሳለሰ የሀሳብ ድጋፍና ማበረታት ወቅቱ የሚጠይቀዉ አስፈላጊ ነገር ነዉ	0
ሚኪ ትንታኔዎችህ ሁሉ እጅግ በጣም ግሩም ናቸው ሁሉም ሰው እንዲያነበው በ ማቅረብ የጀመሩ አሉ ግን ከፌስ ቡክ ባለፈ በበረራ እና ሌሎች ጋዜጦች ላይ በቋሚነት ትንተናህን ብትቀጥል ተደራሽነቱ ይሰፋል ብየ አሰባለሁ	0
በርታ	0
በትክክል	0
ሰውዬ እንደሚደርሰውና እርግጠኛ ነኝ ተግባር	0
እንዲህ ወደውስጥ አይቶ የራስን ችግር ለመፍታት መሞከር ነው ለህዝቡ የሚጠቅመው አንዳንዶቹ የሆኑ ሀሳቦች ቢበዙበትም	0
አንድ ትንሽዬ ምክር ግን ስለአፋር ህዝብ አኗኗርና መስተጋብር ለማወቅ እስቲ ለትንሽ ወራት ዱፍቲን ሚሌን ጋዳማይቱ ወይንም አእይሳይታ ቁጭ በል ከዚያ እዚህ የፃፍከውን ፅሁፍ መልሰህ እየው	0
ታላቅና በውስጤ የማስበውን ነው የተናገርከው ጦርነት ለማንም የማይጠቅም ሰው በህልውናው ላይ ሲመጣ ብቻ ቆርጦ የሚገባበት መሆኑን ለአማራ ህዝብ ማስተማር ምጥ ለናቷ ይሆናል ሀያሰባት አመት አማራ ጫማው ጋ የማይደርሱ ደካሞች በትእዛዝ ሲያፈናቅሉት ዝም ብሎ የተፈናቀለው ብልሀቱን አጥቶ ሳይሆን ራሱን ማስከበር ተስኖት ሳይሆን ይህንን ብጥብጥ የሚጠብቁ ጠላቶች ስላሉት እነሱን ላለማስደሰትና ሀገሪቱን	0
በነገራችን ላይ ኦሮሞ ፊንፊኔን ኬኛ አለ እንጂ ፊንፊኔን ኬኛ ቆፈ ወይም ፊንፊኔ የኛ ብቻ ነው አላለም ወደፊትም አይልም በጭራሽ	0
ፊንፊኔን ኬኛ ማለት ግን ፊንፊኔ የሌላ ወገን አይደለም ማለት እንዳልሆነ እንዲታወቅ ብቻ ሳይሆን እንደዛ የሚል አንድምታም ሆነ ትርጉም የለውም	0
ፊንፊኔ ኬኛ የሚለው አረፍተነገር ቀጥታኛ የሆነ የአማርኛ ትርጉም የለውም አሁን ያለውን የፖለቲካ ትኩሳት ታሳቢ በማድረግ ኦሮሞ ፊንፊኔን ከኛ ሲል ፊንፊኔ የኛም ነው ማለቱ እንደሆነ መታወቅ አለበት	0
በጣም ግሩም ሀሳብ	0
ሚኪያችን ግን ምን አለ የዶር አምባቸው አማካሪ ብትሆንልን	0
ታላቅ ህዝብ	0
አማራ ነኝ	0
እንደ ቴዲ ብርቱ ጉልበቴ	0
እንደ ገብርዬ ኮስታራ አሞቴ	0
እንደ በላይ ማይስት ጥይቴ	0
እንደ እምዬ ሩህሩህ ልቤ	0
እንደ ፋሲል ጠንካራ ግንቤ	0
አቋቋሜ ዳሽን ተራራ	0
አተያዬ ንስር አሞራ	0
በበላይ ወኔ ጓንዴ ታጥቄ	0
በገብርዬ ክንድ ጦሬን ሰብቄ	0
ሀገር ምጠብቅ ጠላት ምመታ	0
የህዝብ ትምክህት ያገር አለኝታ	0
በትክክል ይህ በአዴ ን የተባለ በድን ከእነሱ የተሻለ ሰው ይሚያማክራቸው ሰው ቢኖር ከእንቅልፋቸው ይነቁ ንበር ምን ዋጋ አለው በአዚም የተመረጉ ፈዛዛ አመራሮች ወይ እይሰሩ አያሰሩ ሆነ ነገሩ	0
አማራ ነኝ አህያ አማራ ነኝ ጉረኛ አማራ ነኝ ቢሀር አልባ አማራ ነኝ ፊንፊኔ እና ራያ ያማረኝ አማራ ነኝ ማንም የሚያታልለኝ ብትጨምርበት ጥሩ ነው	0
ይህ ሁሉ እኮ ጥቂቱ የአማራ ስራ ነውእምላክ ጥበብን አድሎታል እናሚኒልክ እንድም ጊዜ በጦርነት ያልተሸነፍየጥቁር ህዝብ አባትጎቤ ትህንግን ገደል ሰዶ መቀሌ ያስደበቀከሁከ ሚያስቀው ደሞ የነገዳችንን ስም እየጠራህ አማራ ነኝ ብሄር አልባ ስትል ያዝናናኛል	0
ባህርዳር ውስጥ ወደ ስራ ለመግባት የተደራጁ ማህራት አሉእንደ ባህርዳር ከተማ ማህበራትን ወደ ስራ ለማስገባት የአንድ ወር እድሜ የሚበቃ ቢሆንም ኢኮኖሚው ባለበት ስለቆመ አዬዳቸውም ወደ ስራ የገቡበት ሁኔታ የለም	0
ሚኪ ጠጋ ብሎ በጋራ መስራት ጥሩ ነው ከዳር ሆኖ መምከር ብቻ በቂ አይደለምአላሰሩ	0
አላሰሩ ያሉ ነገሮች ሊኖሩ ስለ እሚችሉ እነሱን በጋራ ማየት እና መፍትሄ በመቅረፅ ቶሎ ወደልማት በመግባት የህዝብን ችግር መፍታት ጠቃሚ ይመስለኛል	0
አንድ መልእክት ለነፍጠኞች አድስ አበባ በጣና ሀይቅ መሀል የምተገኝ ደሴት አይደለችም	0
ከፋሽስት ምንሊክ ግዜ ጀምሮ ደሀ የኦሮሞ አርሶ አደር እያፈናቀለች የኦሮሞን ማንነት በህል እና ወግ እያጠፋች ጎንዳሬ መስላ የተስፋፋች ከተማ ናት	0
አሁን ግን የኦሮሞን ማንነት ማጥፋት አትችሉም አድስ አበባ የኦሮምያ አካል ናት እና በኦሮምያ ክልል ስር ትሆናለች	0
ሚኪ ግን ከዚህ በፊትም ጠቆም አርጌ ነበርቲንክታንክ ቡድኖችን መመስረትና የጥናት ቡድን በስፋት መንቀሳቀሱ ይበልጥ ውጤታማ ነውየብቻህ ካንተ ጋር ይቀራል	0
ክልልን ከክልል የሚያገናኙ መንገዶችን ግን የሚሰራው የፌደራል መንግስት ስለሆነ እነዚህ ፕሮጀክቶች የፌዴራሉ መንግስት ይፈቅዳል ወይ ነው ጥያቄው ሀሳብህ ቆንጆ ነው ግን የፌዴራሉን መንግስት ይሁንታ ካላገኘ በክልሉ በራሱ ለመስራትም ያስቸግራል	0
በጣም ትክክለኛና በአፋጣኝ መተግበር ያለበት ምክረ ሀሳብ ነዉ አሁን አማራ ቁስሉ እየጠገገ እና የቀድሞ ሞገሱ እና ደም ግባቱ እየተመለሰ ነዉ	0
ከዚህ በኋበ አገርን የማሰባሰብና የመምራት ሚናዉን መጫወት መጀመር አለበት ዶር አንባቸዉ በአንድ በኩል ባህር ዳር ደሴት አለመሆኗን መረዳት አለባቸዉ በሌላ በኩል የኢትዮጵያ አስተዳደራዊ ክልሎች መሆናቸ	0
ይህን ዲሞክራት ኢኮኖሚካል ብሎም መሀበራዊ መስተጋብር ያለበትን ፅሁፍ በማይሰለች እና በአጭር መንገድ እንዲህ ከገለፅከው ጥናታዊ ፅሁፍ ቢሆን ደግሞ ዘርፈ ብዙ ጥቅም እንደሚሰጥ ጥርጥር የለውም ግን ሚኪ እነኚህ የነደፍካቸው ፕሮጀክቶች ማስፈፀሚያ ፋይናንስ እንዴት ሊገኝ ይችላል የሚል ቢኖረው የተሟላ ይሆናል የሚል ግምት አለኝ	0
ኪ በእዉነት የአማራ ህዝብ ምትክ የማይገኝለት ምርጥ ልጅ ነህ አብረህ መስራት ብትችል ጥሩ ለአማራ ችግር መድሀኒት ነህ ከድህነት በላይ ችግር የለም በተፈጥሮ ሀብት ማንም አይወዳደረንም	0
እኛ ማራዎች በኢትዮጵያዊነት የምናምን መሬት ለስራሹ ብሎ ታግሎ ብዙ ዋጋ ይከፈለ ብሄ ብሄረስቦችን ወገኖቼ ብሎ በፍቅር የሚኖር የሚያኮራ ታርክ ያለው እግዚአብሄርን የሚፈራ ህዝብ ነው እግዚአብሄር ከእኛጋራ ነው በርታ እኛ ኢትዮጵያን ጌታ ከኛግራ ነው በርቱ	0
ካንተ ሚጠበቀው መፃፍ ማሳየት እነሱ ቆየት ብለው ይጠቀሙታል የተረሳ ሲመስል ያው የሚክን ሀሳቡ ወሰዱ እንዳይባሉ	0
ግድቡ ግን ያልቃል እንዴ	0
እረ ዶሩን የምታውቁ ካላችሁ ሚኪ አምሀራውን ተጠቀምበት በሉልኝማ	0
ብአዴን አማራጭ የለውም አማራጩ የአማራው ህዝብ ነው ስለዚህ ዶር አምባቸው አሁንም አልረፈደበትም ምናልባት ባለፈው ወጣ ያለ ባህሪ ቢያሳይም የራሱ የሆነ ሲስተም ሊኖረው ይችላል ስለዚህ ከህዝብ ጎን ሁኖ ከላይ የጠቀስካቸውን ሀሳቦች ካራመደ የማንደግፍበት ምክንያት የለም	0
መጠንቀቅ ያለበት አብይ መርዞን ማመን እንደለለበት እና በይሉኝታ መታሰር እንደሌለበት ማወቅ እንዳለበት የግድ ነው	0
አማራ ክልል የኢንዱስትሪ ተቋማትን ለመገንባት የኤሌክትሪክ ሀይል ማነቆ የመሆኑን ያህል ለባለሀብቶች ትልቅ የኢኮኖሚ አማራጭ መሆን ይችላል	0
በተለይ አማራ ባለሀብቶች መደራጀትና የኤሌክትሪክ ሀይል አማራጮች ላይ መዋእለንዋይ ማፍሰስ አለባቸው	0
የኤሌክትሪክ ሀይል አቅርቦት በራሱ አትራፊ ኢንቨስትመንት ነው	0
የአማራ ብሄር ጥላቻ ላይ ያነጣጠረ የብሄር ፖለቲካ እስካለ ድረስ ሌሎች ክልሎች	0
ኪ አንተ ግን ለምን ጠሚንስትር አትሆንም	0
በምእራቡ በኩል ከሱዳን ጋር የጋራ ወታደር ማስፈር የሚለዉ ጠቃሚ አይደለም ያልከው በጣም ገዥ ነውግን ድርድር የተጀመረው ነገር ምን ይሆን	0
ሚኪ ኢኰኖሚው ላይ ማተኰር የሚለው ዋና ጉዳይ ነው ጠንካራና አዳጊ የኤኮኖሚ መሰረቶች ካሉ ሌሎች ነገሮች ቀላል ይሆናሉ በተለይም ዶር አምባቸው ስልጠናው በዚያ ዙሪያ ነው ስለተባለ ትኩረት ይሰጠዋል ብለን ተስፋ እናደርጋለን	0
ከጎረቤት አገሮች ጋር ስላለው ግንኙነት ካነሳህ ዘንዳ ከኤርትራ ጋር በመነጋገር አሰብ ለወሎ ቅርብ በመሆኑ ወደቡን ከደሴ ጋር አልፎም ወደባህርዳር የሚዘልቅ ደንበኛ አውራ	0
ለወር ላንተ ሰቶህ አስተካክለህ ብትለቀው ብዙ ለውጥ ማየት እንችል ነበር	0
አምባቸው ከገዱ የተለየ ነገር ያደርጋል እሚል እምነት የለኝም ሰውየው ለአማራ ህዝብ ቢያስብ ባይሆን እንዲህ አይነት ሰዎችን አማክሩኝ ብሎ ጥሪ ያደርግና ሀሳብ ይጠይቅ ነበር ግን እነሱ እሚሰሙት የአብይን የተንኮል ዜማ ብቻ ነው	0
ሀሳብህ ጥሩ ነው ሙሉ በሙሉ እጋራለሁ	0
ግን የቋንቋ ጉራማይሌ ሳይቸግር ጨው ብድር አልፎ አልፎ የምትቀላቅላቸው እንግሊዘኛ መቀላቀል አማራንና አማርኛን የማዳከሚያ አንዱ ስልት ነው ሁሉንም በንቃት መመልከት ጥሩ ነው የሰናኦርን ታሪክ እንቃኝ	0
ሚኪ አዴፓ እኮ የኢኮኖሚ እና የፓለቲካ ስትራቴጅ መንደፍ አያስፈልገውም አንተ ትጉሁ የአማራው የጀርባ አጥንት ወንድማችን የምትቀርፃቸውን እስትራቴጂክ የሆኑ የኢኮኖሚ እና የፓለቲካ መርሆች አዴፓ ቢከተል የት በደረስን ሚኪየ እድሜህን ያርዝምልን	0
የሚገርም ሀሳብ ነው ለአንተ እግዚአብሄር እድሜ እና ጤና አብዝቶ ይሰጥህ	0
እውነት ነው ህዝባችን በድህነት ሁኖ ነው አንድ ቀን ቀን ይወጣል በሚል እሳቢ መንግስትን እንዴህ እየደገፈው የሚገኝ እንዴ አይነት ሀሳቦች ደግሞ በተለይ ለስራ አጥ ወጣቶች ትልቅ ጠቀሚታ አለው	0
ሌላው በመጨረሻ ያነሳሀው ሀሳብ ማለት የአልጣሽ ፓርክ ጉዳይ አንድ ነገር አቋም መያዝ ያለበት ጉዳይ የመስለኛል ማለት እንዴት የፌዴ	0
እኔን የሚገርመኝ ሚኪ ግን አስጎብኝ ነህ የኢኮኖሚ ባለሙያ ነህ	0
ከሁሉ ከሁሉ አንተ ኢትዮጵያን ከዳር እስከ ዳር ታዉቃታለህ በተለይ መተከል ድረስ ገብተህ ስትተነትን ገርሞኛል	0
በቅርብ ቀን ከአፋር ፕሬዝዳት ጋር ተገናኝቶ መምከርና ከአፋር ወልዲያ ከአፋር ኮቦልቻ እንድሁም ከጭፍራ ጊራና የሚያያይዙ የልማት መስመሮችና የተለያዩ መስኮች ውይይት ማድረግ አለበት	0
ወልዲያ ከተማ የአፋርና የአማራ ህዝ ግንኙነት እዲጠነክር እየተወያዩ ነው ይበል ያሰኛል	0
ባክህ ይህ ሰውዬ ፋራ ነው ምንም አያመጣም የአማርኛ አክሰንቱ ራሱ ድጋፍ እንዳያግኝ ያደርጋል በዚያ ላይ ግትርና ተናግሮ ማሳመን የማይችል ጨ ፊት ነገር ነው	0
ዘመኑ የኦሮሞ ነው ኦዴፓ ውስጥ አድፍጠው የነበሩ ጥቂት ሀሰተኛ ኦሮሞዎች የኦሮሞ አምላክ ስላጋለጣቸው ከአሁን በሀላ ኦሮሞን የሚያስቆመው አምላክ ብቻ ነው አምላክ ደግሞ ኦሮሞ የዋህና ባለ ሀቅ ስለሆነ ከእሱ ጋር ነው	0
እውነት ነው ኢኮኖሚው ወሳኝ ነው ነገር ግን ለክልሉ ህዝብ ጥቅም ሲውል ብቻ ነው	0
ደግሞ የደህንነቱ ጉዳይ ቅድሚያ ትኩረት ሊያገኝ የሚገባው ጉዳይ ነው ይችን አካሂያድ ሻል አድርጋት ሚኪ	0
ከአዲሱ አመራራችን ጋር ከምንም በላይ ጎንደሬ ወሎዬ ጎጃሜ አገው እየተባባልን ለቀማኞቻችን ክፍተት ከመፍጠር ተቆጥበን በጠራ ኢትዮጵያዊነት ከመላው የአምሀራ ህዝብ ጋር በጠነአረ ህብረት እንቁም	0
ጀግናው በረታ ምክር አክብረሀልአሁነም መከረመከረ አድርግልኝ በረታ ብዙ ነግሮችነ ቀረበህ አሳየው በረታበረታተገነኝ አግኘው አነተ ለአማራ ህዝብ ጠቃሚ ነህ ሚስጥሮች አሉ አደባባይ የማይወጡ በቅረበት አወያየው	0
ክልል የአገር ድንበርን ማስመር የሚችል ስልጣን አለው እንዴበሰቶ መቀበልስትል አለም ያመለከው መርህ ስለሆነ ነው የአገሪቱ መንግስት ስለድንበር መደራደር የሚችል አቅም አለው የውስጡ በላይ በላይ ፋታ እያሳጣው	0
ይድረስ ለሚኪ አማራ	0
አማካሪ ማረግ ነበር ሚኪ ለአማራ ህዝብ የሚያስፈልገን ትልልቅ ኢኮኖሚያዊ አዋጭነት ያሉት ፕሮጀክቶች ናቸዉ ምክንያቱም ጠንካራ ኢኮኖሚ ጠንካራ ፖለቲካን መፋጠር ስለሚያስችል ዶር አምባቸዉ ህዝብን የሚጠቅሙ ፕሮጀክቶችን እንደሚቀርፁ ተስፋ አደርጋለሁ	0
የወረታዉ ደረቅ ወደብ አንድ ማሳያ ነዉ	0
የምታደርገው የሀሳብ ፍጭት በጣም ጥሩ እያለ እንግሊዝኛ ቋንቋ ግን ወንድሜን ሸቶህ ነው መሰል የቀረው ምክንያቱም እነዚያ ሰባጢሮ ቃላቶችን ለማን ብለህ እንደምምትጠቀምባቸው ሳስብ አንዳንዴ ያስቁኛል ሌላ ጊዜ ያናድዱኛል	0
የሚመጣው የተሻለ እንዲሰራ የለፈውን ሲታገል አይታይም ሲጥል እንጅ የተባለለትን የለውጡን ፊታውራሪ ገዱ አንድአርጋቸውን በደማቁ ከህዝብ ጋር ማመስገን ተገቢ ነው የሚል አተያይ አለኝ እንደጆተኒ ውጦ ዝም አይመስጥም	0
እሳቸው በከፍተኛ ተንከሳክው ማስተካከል ያለባቸው ሁለት ጉዳይ ነው ኛ ክልሉን ፍፁም ሰለም ማድረግ ኛ ከሌሎዋች የክልል መንግስታትጋር የጋራ መስራት እንጂ የጦር ማስፈር የስጋት ቀጠና ወዘተ የመከላከያ ስራ ነው	0
ግሩም እይታ በምጡቅ አእምሮ በእውነት አሁን ሌሎቹም አክቲቪስቶች ህዝብን በኢኮኖሚ ተጠቃሚ የሚያደርግ ለመሪዎቹም ግብአት የሚሆን ሀሳብ ላይ ማተኮር አለባቸው	0
ሚኪ አምሀራ እጅግ መሳጭ ብስለት የተሞላበት ትንታኔህ ሁሌም ያስደንቁኛል ፈጣሪ ይባርክህ	0
አይቀርም ንስሩ አማራም ቦታውን የትንሳኤውን መንበር እንደ ሚጎናፀፍ ያኔ እምዬ ኢትዮጵያም እንደ ንስሩ ትታደሳለች	0
ዶር አምባቸው መኮንን ወደ ትግራይ ና ሌሎች ክልሎች ምክክር ምናምን የሚባል ጉዳይ ትተው በህወሀት አመራሮች እየተሰደበ ያለውን የኢትዮጵያ መሰረት የሆነውን የአማራ ህዝብ ጥንቃቄ በተሞላበት መንገድ ቢመሩ ይሻል ይመስለኛል	0
ይሄ ምስኪን ህዝብ በጌታቸው ረዳ አፍ መሰደብ የለበትም ለዚህም ደግሞ በክልሉ ያለው ከፍተኛ አመራር ተመጣጣኝ የሆነ አፀፋ መስጠት አለበ	0
ኢኮኖሚውን ለማነቃቃት ከዚህ በፊትም በቱሪስት ዘርፉ አስተዋፅኦ ለማድረግ እንዲመች ከሱዳን ባህርዳር በሳምንት ሁለት ቀን ከተቻለም ከዛን በላይ አውሮኘላን እንዲያርፍ ከአየርመንገድ ጋር በመነጋገርና የዋጋም ቅናሽ በማድረግ የአማራ ክልልን ኢኮኖሚ በሰፊው ማገዝ ያሰችላል ከዚህ በፊትም ተጠይቆ የህወሀት ከአማራ ክልል ጋር የሚሰራው ትልቁ በኢኮኖሚ ማዳከም ስለነበር ፈቃድ ሳያገኝ ቀርቷል ስለዚህ ታስቦበ	0
ሚኪ የአማራ እንቁ የአንተ የተፈጠርህበት ቀመር ልዩ ነው ነፍ አመት ኑርልኝ	0
ስለ ጌታቸው ረዳ እዉነተኛ ሚስጢሮች ክፍል ሶስት	0
ጌታቸው ረዳ የአቶ ረዳ ካህሳይና የአፈራ ተበጀ ልጅ ነዉ እነዚህ እጅግ አድርገን የምንወዳቸዉና የምናከብራቸዉ የራያ ባላባቶች ናቸው ለነዚህ ቤተሰቦች ትልቅ ክብር አለኝ እነዚህ የምንወዳቸዉ የጌታቸው ረዳ ወላጆች በራያ ውስጥ የምናከብራቸዉ ወላጆች ናቸዉ	0
ውንድማችን መፃፍ ብቻሳይሆን ህዝቡ ለነፃነቱ ተነሳሺንት ያለውመልእክት መፃፍ አለብህ የአማራ ወጣት ማቀሳቀሻ የሚሆን መስራት አለበት	0
በኔእምነት ገዱን አላሰራም ያለ ማነቆ አሁንም አለ የወያኔ ዘመቻ የትግራይንና የአማራን ህዝብ ማባላት የወሰን ጉዳይ አነዚህ በፍጥነት መፈታትአለባቸው	0
ዴፓ ውን ማሳደግ ከፈለገ እንደ እነ ሚኪ ያሉትን ወስዶ ቢገጥማቸው እንዴት ሸጋ ነበርግን ነባእነ ነባእነ ከመ ዘኢይነባእነ ኮነ ነዉ ነገሩ	0
ባህር ዳር የአማራ ክልል አካል መሆኑ ጥያቄ ውስጥ አይገባም መቀሌ የትግራይ ክልል አካል መሆኑ ጥያቄ ውስጥ አይገባም አዲስ አበባ የኦሮሚያ አካል መሆኑ ለምን ጥያቄ እንደሚሆን አይገባኝም	0
ሰውዬው ተኩላ ፀረ አማራ ነው ህዝብ ማሰር የጀመረ ተኩላ ለአማራ ምን ሊሰራ ይችላል አዲስ ተላላኪ ሎሌ ነው እንጂ	0
ወደሗላ የተሳበ ወደፊት ለመጏዝ በእጅጉ ይጠቅመዋል አልሞ ተኳሽ ባለቀስት ኢኮኖሚው ፖለቲካው ባህሉ መሬቱ ትምህርቱ ሁሉም የሚፈልገው እሱን ነው	0
ያማራን ችግር በያለበትበመላው ሀገሪቱ የሚፈታየሚታገልየሚመራ እንጅ አማራ ክልል ባህርዳር ከትሞ መግለጫ ከሚያወጣ መሪ ይሰውረን	0
ትኩረታችን የኢኮኖሚ ለውጥ እና ልማት ላይ እናድርግ እየሰራን እንታገል	0
ሚኪ ሁሌም የምታመነጫቸው ሀሳቦች አዳዲስ ናቸው አንተ ያማራ ብርቅዬ ልጅ ነህ ሁሉም ያንስብሀል ምን ብየ ልግለፅህ	0
ከዚህ በተጨማሪ እጅግ ቀዳሚ መሆን ያለበት ከአዲስ አበባ ማርቆስ ባህርዳርጎንደር ሁመራ የባቡር መስመር በፍጥነት መሰራት አለበት	0
እንደነዚህ ያሉ ሩቅ አሳቢ አክቲቪስቶችን ማማከር ለክቡር ርእሰ መስተዳድሩ ወሳኝ ነው ስለሆነም የእርሳቸው አማካሪዎች ትኩረት ቢያደርጉ ጋንን በጠጠር እንዲሉ	0
ኤርትራ የልኡካን ቡድንሙዚቀኞች እንዳስተናገደችሁ አሁን ደግሞ ኤንባሲ አስመራ ልትከፍቱ የፌደራል ስልጣን አልተጋፋችሁም	0
ሰውየውን እናበረታታውሚኪን ግን መግለፅ ይከብደኛልአንደኛ ባይሰራ እራሱ እቅዱ የወደፊት አመላካች ነውወደፊት ይፈፀማል	0
በአነተ መግራት እፈልጋለው የአማራ ጉዳይ አነገብግቦኘ በቸቀጠረኩ በ ወረ ነው የመንግስት ሰራ የለቀኩኘ	0
ምርጥ ሀሳብ ምርጥ ፕሮግራም ታክሎበት ምርጥና ጠቃሚ ውጤት ለህዝቡ ያስገኝለታል እናመሰግናለን አንተም ምርጥ ልጅ ነህ በርታ	0
ጀምረህልን የነበረውን የአማራ ወጣቶች ህብረት በሁሉም ከተሞች ኢኮኖሚያዊ አቅማቸውን የሚያሳድጉበት አሰራር ወደ ተግባር እንድገባና አንዲያድግ ትግበራ ይጀመር	0
ዋው ስለ ኢኮኖሚ ማውራትህ ወድጀዋለሁ ወንድሜ ለራሳቸው ጥቅም ብለው ማህበረ ሰባችን የሚያፍጁ ግን ያሳዝናሉ አንተ ግን እንደዚህ ያለ ምክረ ሀሳብን ቀጥልበት	0
የአማራ ክልል የጅቡቲን የባቡር መስመር ቢጠቀመው በጣም አሪፍ ነው ክልሉ አንድ ቦታ ብቻ ነው የሚነካው	0
በጣም ትክክል አተእዳልከው አዳዲስ ፋፍሪካዎች ቢከፈቱ ሁሉም እዛጋ ነበር ትኩረቱ ስለዚህ አገራችን ከዘረኝነት ዳነች ነበር ግን ምታረገዎለህ ማንይሰማል ብለህነው	0
ዋው እድግ በል ፀሀፊችን እንዴት ያምራል	0
ምርጥ ምክር ሀሳብ	0
ታደሰ ካሳ ማለት የራያ አዘቦን ወጣት ያስጨረሰ ሰዉ ነዉ	0
የራያ አዘቦ ወጣት እኛ ትግሬ አይደለንም ከየጁ ከላስታ ደሴ ባጠቃላይ ከአማራ ህዝብ ተለይተን አንሄድም ባሉበት ወቅት ያስጨፈጨፈ ነዉ	0
ያራያ ህዝብ እንደረገመዉ የሚኖር ሰዉ ነዉ ምክንያቱም ዋናዉ አጫፋሪዉ እሱ ነበር	0
ወደ ሙስናዉ ስንመጣ ጥረት የሚባል ድርጅት የአማራን ሀበት እያጋፈፈ አንድም ቁም ነገር ለክልሉ ህዝብ ያልሰራታክስ የማይከፍል ሀላፊዎቹም ቀጣሪዎቹም በቤተዘመድ የተተበተቡ ናቸዉ	0
ገንዘቡን እየዘረፈዉ ብዙ ድርጅቶች በኪሳራ ነዉ እየሰሩ ያሉት ቢሊየን ብር በላይ በግልፅ የሚታወቅ ገንዘብ ጠፍቷል	0
ከ ቢሊየን በላይ ደግሞ እንዲሁ በማይታወቅ ሁኔታኦዲት በማይደረግበት ሁኔታ ጠፍቷል	0
ይህ ሁሉ ገንዘብ ከድሀ ገበሬ አንጡራ ሀብት የተሰበሰበ ነዉ አሁን ግን ገንዘቡንም ሳይመልስ ለፍትህም ሳይቀረብ በጓሮ በር ሊወጣ ተቃርቧል ይሄ ሰዉየ ትንሹ አባይ ፀሀየ ነዉ ገንዘብ በመዝረፍ በኩል	0
ታደሰ ካሳጥንቅሹ ካልተጠየቀ ማንም መጠየቅ የለበትም አንድ ብቻዉን የአንድ ክልል	0
ወረች ናቹ የክህደታቹ ዋጋ ትከፍላላቹ	0
ያጠፍት ለህግ ማቅረብና የተከከሰሱት ፍርዱ ምን እንደሆን እንኳን አልሰማንም ነገሮችን በማድበስበስ ለማሳለፍና ለማዘናጋት ህዝብ ችላ እንዲል ማድረግ በተበደለውና መከራውን ሲያይ የነበረውን ህዝብ ላይ መቀለድና መጫወቻ ወይም ምንም የማያውቅ ማሀይም አድርጎ እንደማየት ይቆጠራል ይህ ታዲያ በሻሸመኔ ላይ የታየው ፍርድ ገምደል ስእተት ነው ብሎ ህዝብን ለመቃወም ያሳፍራል	0
ሰውን ሲያባላና ሀገርን ሲዘርፍና ሲገል የነበረ ከስልጣን ተነስቶ ሲለቀቅ ለመምራት ቡዙሀን ህዝብ ሳይሆን የተፈለገው ጥቃቶን ባላሀብት ይመስላል ስለዚህ በህዝብ ላይ እንደፈለገው ሲፈነጭ የነበረን ባለስልጣን ቀስበቀስ ሀገር ጥሎ ሊጠፋ ሲል ያየህ ወጣት ምስክር በሊለበት ቢገል ለሟች ሲኦል ይቅለልህ ቢባል ስእተት ነው ሊባል ይችላል ፍትህ የሚፈልገው ህዝብ ፍትህ እያገኝ አይደለም እየተቀለደበት እንጂ	0
ማራ ነቀርሶችን ተገላገለች እንኳን ደሰአለን	0
ሁን እንዲህ ያሉት ፀረ ህዝብ ሰዎች መገለላቸው ነው ዋናው ተፈላጊው ነገር የሚጠየቁበት ጊዜ ይመጣል	0
አቦ ሚኪ አንተ ብአዴን ላይ ስተነፍስ ለብአዴን ካርቦን ሞኖ ኦክሳይድ ነህ እኮ	0
እንዴት ሰው ታጣ ለዚህ ባንዳ ወይኔ	0
በሰፈረው ቁና ይሰፈራል የጊዜ ጉዳይ ነው	0
ይድረስ ለንጉሱ ጥላሁን	0
ጭካኔው በዳስ ከሚማር ህዝብ ላይ ይሄን ያክል ብር	0
ሀብሩ ወረዳ ላይ የተጀመረው ሆስፒታል	0
አመት ሊሞላዉ ነው ከተጀመረ መግስት አላየዉ እደሁ ጠቁምልን በዛም ያሉት ፀረ ህዝብ የወያኔ ቡችሎች ይነሱልን	0
የቄሳርን ለቄሳር ትተን ታዴን አንድ ጥያቄ ልጠይቀዉ ፈለኩ በአንድ ወቅት የወሎ ተሸሪ ሆስፒታል ነገር በተጧጧፈበት ሰአት ከዉጭ የመጡ ባለሀብቶች ከአንድ ሁለት የሀገራችን ባለሀብቶች ጋር ሆነዉ ታደሰ ጋር ለስራ ይሄዳሉ በወሬ በወሬ ታደሰ ወሎ በተርሸሪ ደረጃ ሆስፒታል ለመስራት እንቅስቃሴ ላይ መሆናቸዉን ክሬዲቱን የሰጠዉ እሱ ላለበት ስብስብ ነዉ በኩራት ይናገራል	0
ሰዎቹም መልካም ነዉ ነገር ግን በተርሸሪ ደረጄ ወጭዉ ከባድና ከፍተኛ ገንዘብ እንደሚጠይቅ ጠቆም አርገዉ ስለ ስራ አዉርተዉ ይለያያሉ	0
ታድያ ታዴን እንዲያ ያወራለት ሆስፒታል ዛሬ ላይ ምን ላይ ደረሰ አረ ምን ላይ ሚኪ አንተ ግን ክበርልኝ ሁሌም ህዝቤ እንዳልክ ነዉ ምስጋናዉ ይገባሀል	0
የአማራ ህዝብ አንገቱን ይዞ ካለበት ለህግ ማቅረብ አለበት	0
ይህን በሰአቱ ቦታ ስጡት በራሱ ጊዜ እዳሾልክ	0
ኧረ አንተ ልጅ	0
ከዚህ ደሀ ህዝብ ቢሊየን በር በልቶ የትም አያመልጥም የግድ መያዝ አለበት	0
ነፍጠኞች ሁመራ ሲባል ሰሊጥ ከፋ ሲባል ቡና ሀረር ሲባል ሰንጋ	0
ወላይታ ሲባል ቅቤ አድአ ሲባል ጤፍ ነው የሚታያቸው እንጂ እዛ	0
ያለው ህዝብ ቋንቋ ባህል ታሪክ አይታያቸውም ይህ አመለካከት	0
ሚኪ ትንታግ እኮ ነህ አንበሳዬ	0
ወልዲያ ላል ሆቴል ድርሻ አለው	0
ይሄ ደግሞ የማነው ጀዝባ እንዳትለቁት	0
በህግ ይጠየቅልን	0
በአልማ ልማታዊ ህብረት ምእራብና ምስራቅ አማራ ሁለት አዳሪ ትቤቶች ለመገንባት የተሰበሰበው ገንዘብ የት ወደቀ በልልኝ ህላዊ ዮሴፍን አስረጅ ተጠቀም በልልኝ	0
ለዉጡ ጥሩ ነዉ ጅምር ነዉ እንጅ አልተቋጨም ብዙ እንጠብቃለን	0
እኔ አላቅም ነበር ይህ ሰው እንደዚህ መሆኑን	0
ግን አማራ ነው	0
ቅፅል ስሙ ታደሰ ጥንቅሹበትክክል ገለፅህው	0
እባካችሁ ፍርዱን ለፈጣሪ ስጡ	0
የአልበሽር መወገድ በአንድ በኩል ጥሩ እድል ይመስላል አልበሽር ከአለም የመንግስታት ስርአት የተገለለ መሆኑ ድርደር ለማድረግ የማይመች በተደራደረበት ነገር የማይረጋ እና አስተማማኝ ያልሆነ ሰዉ ነበር	0
ምናልባት ትራንዚሽናቸዉ ሰምሮላቸዉ ዲሞክራሲያዊት ሀገር ከሆነች ለኢትዮጵያ የሚጠቅም ነዉ የሚሆነዉ ምናልባትም የሱዳን ትራንዚሽን ከኢትዮጵያ በተሻለ መልኩ ሊሄድ ይችላል	0
ገር ግን የሱዳን ጉዳይ በጥንቃቄ መታየት አለበት ወታደሩ የበላይ ጠባቂ ሁኖ ሱዳን መንግስት አልባ ሁኖ ለሚቀጥሉት ሁለት አመታት መቆየቱ ነዉ	0
በእርግጥ የወታደር ነገር አይታወቅም ሌላ አምባገነን ሁኖ ሊቀጥል ይችላል ሁለተኛ በእነ አሜሪካ ተጥሎ የኖረዉ ማእቀብም አሜሪካ እንደመደራደሪያ በመጠቀም ወታደሩ ሀገሪቱን ወደ ዲሞከራሲ እንዲያሸጋግራት የማድረግ ፍላጎት ይኖራል	0
በዚህም ህገወጥ የንግድ የመሳሪያ እና የሰወች ዝዉዉር መበራከቱ አይቀርም	0
ከዛም በላይ ሱዳን ላይ የተለያዬ ሀገሮች የተለያየ ፍላጎት አላቸዉ በአንድ በኩል አሜሪካአረብ ኤሜረትስሳዉዲ አረቢያ እና ግብፅ የራሳቸዉ ደጋፊ የሆነ መንግስት ለማቋቋም መቋመጣቸዉ አይቀርም በሌላኛዉ በኩል ቱርክኳታርእና ራሸያ በኢራን እየተመሩ እንዲሁ የራሳቸዉ ደጋፊ የሆነ መንግስት ይፈልጋሉ በእነዚህ ሁለት ሀይሎች ብሎም የሪቮሊዉሽኑ አዲስነት ተደማምሮ ሱዳን ያልተረጋጋ ሀገር ሆኖ ሊቀጥል ይችላል	0
የእኛም ጉዳይ እንደሚታየዉ የተፍረከረከ ነዉ ከደንባራ በቅሎ ቃጭል ተጨምሮ እንደሚባለዉ የሱዳን ጉዳይ ለእኛም ሌላ ጣጣ ይዞ ሊመጣ ይችላል	0
ምእራብ አማራ አካባቢ ለጊዜዉ ጠበቅ ያለ ቁጥጥር ያስፈልጋል አለበለዚያ ከጠመንጃ አልፎ ታንክ እና ኦራል ገላቫት እና መተማ ላይ ሰዉ ሊገበያይ ይችላል	0
የሱዳን ችግር በአለማቀፉ አይን ለኤርትራ የተሻለ ነገር ይኖረዋል ምክንያቱም በሱዳን ላይ ትኩረታቸውን አርገው የቆዩ አገሮች በዚህ ሰአት ኢትዬፒያ ውስጥ ካለው ቀውስ አንፃር ኤርትራ የተሻለች አማራጭ ትሆናለች	0
በምህራብ አማራ ያለው ጥንቃቄ እንዳለ ሁኖ በሱዳን ወቅታዊ የውስጥ ሁኔታ የህውሀት ከምሽግ ወጥቶ ሊያደርግ የሚችለው እንቅስቃሴ በትግራይና በኤርትራ መካከል አዲስ ክስተት ይዞ ሊመጣ ይችላል ይህ ደሞ የኢትዬፒያን የፖለቲካ ውጥረት ወደቀጠናው ቀውስ እንዳይስበው የቅርብ ክትትል የግድ ይላል	0
ሚኪ የአልበሽር መውረድ ገና ያልተገለጠ ውስብስብ ችግር ሊገጥመን ይችላል	0
የግብፅ እጅ ሱዳን ላይ እጅግ ከባድ ነው ግብፆች ምናልባት በውስጣችን ያለውን ችግር በውጭ በሱዳን በኩል አጣምረው ውጥረት እንዳይፈጥሩ ትልቅ ስጋት አለኝ ለማንኛውም የኢትዮጵያ ፌደራል መንግስት እንዱሁም የአማራ ክልላዊ መንግስት በደንበር በኩል ከወትሮው በላይ እጅግ በጣም ሊጠነቀቁ ይገባል	0
ሚኪ ዘብሄረ ቡልጋ	0
የውጪ ጉዳዩ ላንተ ነው የሚገባው የኔ	0
አክሊሉ አብተወልድ	0
ከቻልን ቶሎ እንጠቀምበት	0
ጥሩ ሀሳብ ነው ሚሰማ ቢገኝ	0
ፓለቲካውን አንተ ተንትነው	0
የንስር አይን እኮ ነው ያለህ	0
ጠሚውምኮ ኮሎኔል ነበሩ	0
ግን እኮ ሚኮ የጦር መሳሪያ ከሱዳን ወደ ኢትዮጵያ መግባቱ በጣም ጥሩ ነው በለይ አማራ ህዝብ በህጋዊ መንገድ የሚያስታጥቀው ወይም ደግሞ ደህንነቱን የሚጠብቅ ጠንካራና ታማኝ መንግስት ስለሌለው በህገወጥ መንገድ በገንዘቡ ገዝቶ ራሱን ከጠላቶቹ ይከላከላል	0
መሳሪያ ያስፈልገናል በሱዳን በኩል ለ አማራወች	0
አማራ ብሄራዊ ክልላዊ መንግስት ዉስጣዊ ዉጫዊ ስጋቶች እድሎች መተንተን ብቻ ስራዉ የሆነ ፕሮፌሽናሎች ቲም ይዞ ቢሰራ ይመረጣል ፌደራል መንግስት እምነት የሚጣልበት አይደለምና	0
እኔ እንደውም በዚህ አደጋጣሚ መሬታችንን ማስመለሰ የምንችል ይመስለኛል በደንብ ከተጠቀምንበት አጋጣሚውን	0
በርታልን ሚኪ	0
ጀምረኸዋን ነገሩን ግን አልጨረስከውም	0
አልበሽር ለኢትዮጵያ ባሁን ስአት ወሳኝ ነበረ ምክኒያቱም ኢትዮጵያ ጠንካራ መንግስት የለም ግብፅና ኤርትራ እንደፈለጉ ይናኛሉ አጠቃላይ ምስራቅ አፍሪካን ግብፅ ተፅኖ ታሳድርበታለይ	0
ለአማራ መንግስት ጠንካራ ማንቂያ ነች	0
እንግሊዝ ከሱዳን ሲወጣከ ትከፈላለችሼህ ሁሴንሰልፏም ከጉግ ማንጉግከነ ኢራን ጋር መሆኑ እኮ ድሮ ጀምሮ ይታወቃልመፅሀፈ ህዝቄል	0
እዚሂ ጋ ሌላ ቱኩሳት	0
አቤት ጭንቅላት እናት ወልዳለች	0
ህን ክፍተት በደንብ ተጠቅመን መሳርያ ከሱዳን በማስገባት የአማራ መከላከያ መገንባት ይኖርብናልጠንካራ የአማራ መከላከያ ከገነባን በኋላ የኢትዮጵያን መከላከያ በማፈራረስ ሀገሪቱን እንደ ገና ለ አመታት መምራት የምንችልበት እድል በእጃችን ይገባልስለዚህ የሱዳንን ድክመት በአግባቡ የምንጠቀምበትን መንገድ መቀየስ ይኖርብናል	0
ፈጣሪ እጅህን ይባርከው ምኪ እንዳተ አይነቱ ጀግና ከየትስ ይከኛል በሚገባ አስቀምጠህዋል	0
ሚኪ አንድነገር ልንገርህ አልበሽር በመውረዱ አማራው ይጎዳል ምክንያቱም አልበሽር ለዘብተኛ ሆኖ በጉልበት ያዛቸው እንጂ የሱዳን ህዝብ ከግብፅ ባልተናነሰ መልኩ አማራን ለስፋፋቴ ፀርነውብሎ በጠላትነት ይፈርጀዋል እንግዲ ምንታደርገው አይፍረድብህ እኮነው	0
ለእኛ ጠቀሜታው ሰፊ ነው ሱዳን ብትዳከም መሬታችንን በቀላሉ መቀማት እንችላለን	0
የወያኔ ደጋፊው አልበሽር መወገዱ ለአማራ ሌላው ድል ነው	0
ታንክማ ገበያ ላይ ካገኘን ምኑ ይጠላል	0
ለነስም አይጠሮ ደግሞ መራር ሀዘን ነው	0
ዝቡ በፍፁም በወታደሩ አሻጋሪነት እምነት ያለው አይመስልምአለመረጋጋቱ ሊቀጥል ይችላል	0
ልክ ብልሀል ሚኩ	0
እመነኝ ለአብን ግን ምንም ጠብ አይልለትም	0
ሲጀመር ቱርክ ኳታር ራሺያ እና በኢራን እየተነሩ ያመጡት መፈንቀለ መንግስት ይመስላል	0
ትክክል ሚኩ	0
ጠቅላይ ሚኒስተር ንስሩ ይህንን ከትቧል	0
የሱዳን ሙሉ መሆኑ ጥሩ ነገር ቢሆንም ወታደራዊ የሆነ ነገር ሁሉ ግን መጨረሻው አያምርም ቶሎ ወደ ከልተላለፈ ወደ አካባቢዎች ጦር የመከፋፈል እና የሊቢያ እጣፈንታ ሊያጋጥማት ይችላል	0
የዳርፉር ነፃ አውጪ እንደለ ሆኖ ሌሎችም ወደ ተመሳሳይ ድርጊት እንዲገቡ ሊያደርጋቸው ይችላል	0
አዴፓ ይህን እድል ተጠቅሞ በቂ መሳሪያ ከሱዳን ቢያስገባ ጥሩ ነው	0
ከጠመንጃ አልፎ ታንክ እና ኦራል ገላቫት እና መተማ ላይ ሰዉ ሊገበያይ ይችላል	0
አዴፓ ግን ለምንድነው አንተን አማካሪያቸው የማያደርጉ	0
እነሚኪን ባየንበት አይናችን	0
እይታህ ጥሩ ነው በተረፈ ከስጋትህ የረሳሀው ነገር	0
ኛ የግብፅ ጉዳይን ሳትዳስስ አልፈኸዋል	0
ግብፅ የህዳሴውን ግድብ በዘላቂነት እንዳያልቅ ና ለማሰናከል የመፈንቅለ መንግስት ስራውን ልትጠቀምበት ትችላለች ብየ እሰጋለሁ	0
በዳርፉር ውዝግብ የአሜሪካ ና የቻይናን ፉክክር ለቀጠናው ሸብር ሊቀሰቅስ ይችላል	0
ይህም ለጎረቤት ሀገራት ስጋት ይኖረዋል	0
በጠቀሜታ የሚታይ ነገር	0
የአልበሽር ወዳጆች ህወሀት ጋር የነበረ ጉዳይ ተቋርጦ ለኢትዮጵያ መልካም አጋጣሚ ሊሆን ይችላል	0
የጊዜያዊው ወታደራዊ አስተዳደር የኮንትሮባንድ ንግዱን በመቆጣጠር የተሻለ ሰላም በቀጠናው ሊፈጠር ይችላል	0
አለበለዚያ ከጠመንጃ አልፎ ታንክ እና ኦራል ገላቫት እና መተማ ላይ ሰዉ ሊገበያይ ይችላል	0
ምርጥ ትንታኔ	0
የሚከሰተውን በግልፅ ለምን አትነግረንም	0
አልበሽር የህዳሴውን ግድብ ከማይቃወሙት ውስጥ ነበሩ መጭውን ማን ያውቃል	0
ኤዲያሚን ዳዳ በተገነደሰ በ ኛው አመት ተመሳሳይ ቀን ሁለተኛው ዳዳ ተገነደሰ	0
የአምባገነኖች ፍፃሜ ሲያስጠላ	0
በመጀመሪያ ለአቶ ገዱም ለአቶ ለማም የመልካም ስራ ዘመን እየተመኘሁ በባለፈዉ አመት በተካሄደዉ ፖለቲካዊ ለዉጥ ሁለቱም ሰወች የክልል መሪ ሁነዉ የየራሳቸዉን አስተዋፅኦ አድርገዋል	0
አሁን ደግሞ በሀገር አቀፍ ደረጃ ከፍ ያለ ሀላፊነት ተሰጥቷቸዋል መልካም ነዉስራቸዉንም የምናየዉ ይሆናል	0
የዉጭ ጉዳይ ሚንስትርን መምራት ከባድ ሀላፊነት ነዉ በእርግጠኝነት አቶ ገዱ ይሄን እንደሚዎጡት ተስፋ አደርጋለሁ	0
ለዚህም የሚያግዘዉ ልምድ አለዉ ለምሳሌ የአማራ ክልል ፕሬዝደንት በነበረበት ወቅት ከተለያዩ ሀገራት መሪዎች ጋር የመገናኘት እድሉ ነበረዉ እንዲሁም በባለፈዉ አመት በተካሄደዉ ፖለቲካዊ ለዉጥ ዋና ተዋናኝ በመሆኑ እና የአማራ ህዝብ እንቅስቃሴም በአለም ማህበረሰብ ዘንድ አቴንሽን ተሰጥቶት መቆየቱ አቶ ገዱን በዲፕሎማቲክ ማህበረሰቡ ዘንድ በቀላሉ እንዲታወቁ ያግዛቸዋል	0
ከጎረቤት ሀገራት ጋር መተዋወቁ ለምሳሌ ከሱዳን ጋር በቅርቡ የኤርትራዉን ፕሬዝደንት በባህርዳር ማስተናገዱም አንዱ ጥሩ እሴቱ ነዉ	0
በባለፈዉ አመት የአሜሪካዉ አምባሳደር ከአንዴም ሁለቴ ባህርዳር ድረስ በመሄድ በሀገሪቱ ፖለቲካ ጉዳይ አወያይቶታል	0
ከዛ ባለፈ አቶ ገዱ የሰከነ እና እንደሌሎቹ ለአለም ህዝብ እከሌ ቅኝ ገዝቶኛል እከሌ ደርግ ነበር እከሌ ኢትዮጵያን በድሏል ብሎ ማህበረሰብን ሊፈርጅ የማይችል እና የኢትዮጵያን ህዝብ በእኩልነት የሚያይ መሆኑ ለሀገሪቱ ጥሩ ነዉ	0
በዋናነት ደግሞ የአማራ ህዝብ ጥቂት ያርፋል የአማራ ህዝብ አንዲት ጥያቄ ባነሳ ቁጥር ለዲፕሎማቲክ ማህበረሰቡ የሚነገረዉ ታሪክ ለኢትዮጵያ ህዝብ በሰነድ ተዘጋጅቶ ከተሰጠዉ ስልጠና በላይ ስሙን አጉድፈዉ እና አጠልሽተዉ ነዉ	0
ይህን የዉሸት ታሪክ መተረክ ቢያንስ እዚህ ላይ ይቆማልአቶ ገዱ ጥሩ ዲፕሎማት እንደሚወጣዉ እንተማመናለን እንዲሳካልወት እንመኛለን በተጨማሪም ማንኛዉንም እገዛም እናደርጋለን ለአቶ ለማም መልካም እድል	0
ሚኪ ያንተን ሙያዊ አስተያየት ይሻሉ ብየ አስባለው	0
መከልከል ብሆን እመርጥ ነበር መከልከያፍን እነጃዋር በመቆጣጠር ላይ ናቸው ይህ አደገኛ ነገር ነው ሺዋና ወሎ ላይ የሰሜን አዛዥ ከብርሀኑ ጋር ሆነው በግልፅ የኦነግ ጃኔራል ሆነዋል	0
ለማ እውነት አማራ ኦሮሞ አንድነትን ከፈለገ ሁለቱን ስሞች ከመከላከያ ማባረር አለበት	0
የጃንጥራርን ቦታ በግርግ መሀል አሳጥተውናል	0
ቁልፍ ቦታ ነውአሁን እሱን የት መደቡት	0
ይህ አማርኛው ራሱ ለአአ የሆነ ሰውዬን እንዴት ባልጠፋ ሰው ውጭ ጉዳይ ሚኒስትር ይደረጋል ይህቺ አገር ታስዝናለች	0
አቶ ገዱ ጨዋ ሰው ነው በስሜት አይነዳም ጎጠኝነት የሚባል ነገር የለበትም እራሱን አያካብድም ከአንድ ወይም ከሁለት ሰው ጋር ሆኖ መሀል ከተማ ልታገኘው ትችላለህ	0
ስትናገር ብትውል ያዳምጥሀል የክልሉን አካባቢዎች ጠንቅቆ ያውቃቸዋል ሰው ያምናል ችኩልነት የለበትም እናም አንዳንዴ በምንፈልገው ፍጥነት እርምጃ ላይወስድ ይችላል ከዚያ ውጭ ትክክለኛ የዲፕሎማሲ ሰው ነው በጣም ውጤታማ እንደሚሆን አልጠራጠርም	0
መልካም እድል ኦቦ ለማም ቢሆን የሰራቸውና የወሰናቸው ቆራጥ ውሳኔዎችን አንረሳም መከላከያውን መስመር እንደሚያሲዘው እጠብቃለሁ	0
ከምንም በላይ ግን አራቱ ሰዎች አብይ ደመቀ ለማና ገዱ በቅርብ መስራታቸው ሀገር የማሸጋገር ሂደትን ሊረዳ ይችላል ዶር አምባቸውና አቶ ሽመልስ ገና የምናያቸው ይሆናሉ	0
ሽመልስን አላውቀውም አምባቸው ግን ደፋር ቢሆንም ምን ያህል ስትራቴጅክና ሁሉን አቃፊ እንደሆነ ደፍሬ መናገር አልችልም የወንዙን ልጆች ይሰበስባል እያሉ ያሙታል ያ እንዳይሆን እመኛለሁ	0
ሽዋና ጎንደር ብዙ ደጋፊ አለው የወሎንና የጎጃምን ነገር ሊያስብበት ይገባል	0
ከዛ ባለፈ አቶ ገዱ የሰከነ እና እንደሌሎቹ ለአለም ህዝብ እከሌ ቅኝ ገዝቶኛል	0
እከሌ ደርግ ነበር እከሌ ኢትዮጵያን በድሏል ብሎ ማህበረሰብን ሊፈርጅ	0
የማይችል እና የኢትዮጵያን ህዝብ በእኩልነት የሚያይ መሆኑ ለሀገሪቱ ጥሩ ነዉ	0
አይ ሚኪ ምናባቴ ላርግህ እንዳውእግረ መንገድህን ከሰፈሩ የዘለለ የማያስበውን ሁሉ ልክ ልኩን ነገርክልኝ	0
ፓ አይ ንግግር እሙት ሚኪ በቃ የአንተን ፅሁፍ ማንበብ አንድ ከርስ ከሀውሰድ በላይ ነው ያውም ያለምንም ክፍያ ኑርልን	0
ከፍከፍበልጨዎሰውነህ ታስፈልገናለተህ	0
ሚኪዬ በፖለቲካል ሳይንስ የጥናት ዘርፍ በተለይ በውጭ ጉዳይ ሚኒስትር ስር ያሉ ዝርዝር የሀገሮች ግንኙነት ፖሊሲ ሲገለፅ ልክ እንደ እግር ኳስ ጨዋታ ነው የአቶ ገዱ ብቃት አስፈላጊ መሆኑ እንዳለ ሆኖ በአቶ ገዱ አንደበት የሚንቆረቆረው የሀገሪቱ የውጭ ጉዳይ ፖሊሲና ህግ እንዲሁም አቛም ነው	0
አንዲት ሏላዊነት የሆነች ሀገር ከሌላ ሀገር እና አለም አቀፍ ተቛማት ጋር የምታደርገው መስተጋብር ሁሉ ከሀገሪቱ የበላይ ባለስልጣናት እና ከሀገሪቱ ህግ ጋር በቀጥታ የተንሰላሰለ ውሳኔን የሚጠይቅ ስለሆነ አቶ ገዱ ያን ያህል የሚፈትናቸው ቦታ ነው ብዬ አላስብም ሌላው አቶ ገዱ በሀገሪቱ በቁጥር ሁለተኛ እንዲሁም የሀገሪቱን ሲቀምር ከኖረው ከአማራ ማህበረሰብ ውስጥ የተገኙ ናቸው	0
የራሱ የሆነ ትልቅ እንደምታ አለው ከዚህ ሁሉ በላይ ላለፉት አመታት ሀገሪቷን ሲዘውር ከነበረው ኢህአዴግ ውስጥ አውራ ፓርቲ ብአዴን አዴፓ የወጡ ሰው ናቸው የሀገሪቱን የፖለቲካ አካሄድ ጠንቅቆ የተረዳው ውስጠ ወይራ የሆነ ሰው ነው በአግባቡ ከተጠቀመበት አንዳንዶች በስሜታዊነት ከሰጡት መላ ምት በላይ አስደማሚ ለውጥ ያመጣል ባይ ነኝ ይሳካለታል ብዬም ተስፋ አደርጋለሁ	0
እንዷንተ አይነት አመለካከት ያለውን ቢያበዛልን ጥሩ ነበር ጨዋነትህና አዋቂነትህ ገዝፈውብኛል ሚኪሾ በርታ	0
በገብሬል ሚኪ	0
የእንግሊዘኛ ችግር ካለበት	0
አለማወቁ ችግር እብደሌለው እና	0
የእንግሊዘኛ ችግር ካለበትአለማወቁ ችግር እብደሌለው እና	0
አንተ ራስህ እንደ ገዱ አስተዋይ ነህ መልካም እይታ ግን እኔን የገረመኝ የእኛ የሆኑን ሰዎች የአሰራር ስልት እና ድጋፍ በማድረግ ፋንታ ለምን ለትችት ብቻ እንሮጣለን አንድ መስመር የምንፅፍ ሁሉ እራሳችን እንደፓለቲከኛ በማሰብ ዝም ብሎ መዘላበድ የእኛን የሆኑ ሰዎችንም እንዳናሰራ እንቅፋት እንሆናለን ለድጋፍ እንጂ ለትችት አንሩጥ	0
ኢህአዴግ አጋር ድርጅቶች እውነተኛ ንሰሀና ተሀድሶ አድርጋ ክልሏንና ህዝቦቿን ከፀጥታ ስጋት ነፃ አድርጋ የሌላ ክልል ተወላጅ ወገኖቻችንም በዘሩና በብሄሩ ምክንያት አንድም ሰው ያልተሰደደባት መልካም አስተዳደር የሰፈነባትን ክልል ገንብታለች	0
ለ አመት ክልላችንና ህዝባችንን በድለናል አሁን ህዝባችንን መካስ አለብን በማለት በራሳቸው ፍላጎት ወደ ትግራይ በመምጣት አስከ አሁን በሚገርም ሁኔታ እያገለገለች ትገኛለች	0
ህወሀትወያኔ ገድለን ቀብረናታል ተባለ	0
ከዛ ክልሏን በሰላም ማስተዳደር ስትጀምር መቐለ የመሸገችው ህወሀትወያኔ ተበለ ሌላውን ተውትና	0
ወድቀህ በዛው መቅረት ሳይሆን ከዉድቀትህ መነሳቱ መሰለኝ ጠንካራ የሚያስብለው	0
ውጤቱም የትግራይ ክልል ከሌላ ክልሎች አንፃር ሲታይ በየተለየ መልኩ አላስፈላጊ ግጭቶችና የፀጥታ ችግሮች የማይታይባት የሆነችው	0
የሰረቁና ሌላ ከባድ ወንጀል የሰሩ ይታሰሩ በህግም ተይዘው ለፍርድ ይቅረቡ ወንጀለኛ ማንንም ህዝብ አይወክልምና	0
ህዝብን ወክላ ትግራይን እየመራች እስካለች ድረስ ህወሀትወያኔ እያሉ ስም ማጥፋትና በሌላ ክልል ግጭት ሲነሳ የወያኔ እጅ አለበት ህወሀት ነች ከሚል የወረደ የውሸት ወሬ እንቆጠብ	0
የተረገመ ዘረኝነት ትተን ያለፈውን ጊዜ ረስተን ይቅር ተባብለን አንደ ቤተሰብ በፍቅር እንኑር	0
ሚኪ እስካሁን ድረስ ከፃፋቸው ፅሁፎች መካከል ይኸኛው ምክንያታዊነትና ሀቅ የራቁት ፅሁፍ ነው	0
ለገዱ እንግዲህ መልካም የስራ ዘመን ስራውን የምናየው ነው የሚሆን በይሉይታ የሰው ሀሳብ መቀበል የለበትም የነ ለማ ግን መከላከያ ላይ መጠራቀማቸው አልተመቸኝም እረግጥ ፍላጎታቸው ዝም ቢባሉ ሁሉንም ቢሆንም	0
አንተ በጣም ልዩ ነህ ወዳጀ	0
አቦ ሚኪ ክፉ ቃል እኮ አየወጣሽም	0
የምትገረም እና ለሌሎች ምሳሌ መሆን የምትችል ሰዉ ነህ	0
ሚኪ ቅመም	0
እናግዛለን አንድ አማራ ለሁሉም ሁሉም አማራ ለአንዱ ማለት ይህ ነው	0
ኢህዴግ አሁንም በጥልቀት ተሰብስቦ በጥልቀት ተገማግሞና በጥልቀት ወስኖ ስብሰባውን በድል አጠናቋል እንደ ኢህዴግ ግን በጥልቀት የታደለ የፖለቲካ ፖርቲ ይኖር ይሆን እስኪ በጥ	0
ልቀት ራሳችንን እንጠይቅ	0
ያለከው ልጅ ሰላም ነው	0
በጣም መልካም ሰው ነሆት አቶ ገዱ አንዳርጋቸው እግዚአብሄር አምላክ መልካም የሳራ ዘመን ይሆንልሆት ይርዳሆት መልካም የሳራ ዘመን ተመኛሁ አቶ ገዲ አንዳርጋቸው ሁላችንም ከጎንሆት ነን ለአቶ ለማ መገርሳ መልካም የስራ ዘመን ይሁንልሆት	0
እንግሊዝኛ በእንግሊዝ ተወልደ አሜሪካ ላይ አደገ ወርቅነህ ገበየው ገደለው ገዱ አንዳርጋቸው ሊቀብረው ነው	0
ለአቶ ለማም መልካም እድልየለማንም እንዲህ ብታብራራው ጥሩ ነበር ለነገሩ ጌጡ ተመስገን በደንብ አድርጎ ዘግቦታል	0
በአንድ አመት የለውጡ ማእበል ከትግራይ ክልል ውጪ ሁሉም በኢትዮጵያ የክልል ፕሬዳንቶችን ሁለቱ የከተማ መስተዳድሮች በለውጡ አደናቃፊነት መርህ እና በተለያየ መንገድ ሁሉንም ከስልጣን በማንሳት አዲስ ተከታዮቻቸው የቀየረው ቲም ለማ የፌዴራል ስልጣኑን ከወያኔ በወሰደው ሌላውን ያገለለ ተሞክሮ የሀገሪቷን ዋስትና የሆኑት የፋይናንስኢኮኖሚ እና የመከላከያ ቁልፍ ቦታዎቹን እየተቆጣጠረ ነው	0
ዶር አብይ አህመድ ጠቅላይ ሚኒስቴር	0
አቶ ለማ መገርሳመከላከያ ሚኒሰቴር	0
ጄኔራል ብርሀኑ ጁላምኢታማዦር ሹም	0
ጄኔራል ይልማ መርዳሳአየር ሀይል አዛዥ	0
ወሮ አዳነች አቤቤየገቢዎች ሚኒስቴር	0
አቶ ብርሀኑ ፀጋዬጠቅላይ አቃቤ ህግ	0
አቶ ባጫ ጊኒየንግድ ባንክ ፕሬዚዳንት ምፕሬዝዳንቶቹ	0
ዶር አለሙ ስሜ የሜቴክ ዋና ዳሬክተር	0
አቶ ወዮ ሮባየስኳር ኮርፖሬሽን ዋና ስራ አስፈፃሚ	0
የትኛውም የብሄር ፖለቲካ አራማጆች በሆነ መንገድ ወደ መሪነት ሚና ከተሸጋገሩ ለሰፊው ህዝብ ለ ቱም ብሄረሰቦች እኩሌታ የሚያስተዳድሩ ሳይሆን የራሳቸውን ጎሳዎች ጥቅም ለማስጠበቅ የሚሰሩ ወደ አንድ ያጋደለ ሚዛናዊ ያልሆነ የኢትየጵያ ባለ ተረኛ ገዢዎች ናቸው	0
አማራ ስለሆንኩ አቶ ገዱ የውጭ ጉዳይ ሚኒስትር ስለሆነ አልተደሰትኩም	0
ሚኪ ያልከው እውነት ቢኖርም የሶማሌው አቶ ሙስጠፋ ቢሆን የተሻለ ነበር ብዬ አምናለሁ አቶ ገዱ መከላከያ ቢሆንና መከላከያን የወረረውን የኦነግ መንጋ ቢያሳሳው ጥሩ ስራ ይሰራ ነበር	0
ልዩነታቸውን ትተው ጡንቻቸውን ማጠንከር አለባቸው	0
የአማራ ክልል የፖለቲካ ሀይሎች ላይ ነው	0
በጣም የተፍረከረከ ይመስላል አዴፓን በዚህ ሰአት ማዳከም አቅመቢስ እያረገው ነው	0
የክልሉ መንግስት ህዝቡን ማዘዝ ያቃተው ይመስላል አናርኪዝም እየበዛነው የጎረምሶች ማናለብኝነት እየታየ ነው	0
አማራ እንደግና ባሪያ እንዳይሆን አንድነቱ ማጠናከር በጣም ወሳኝ ሰአት ላይ ነው ለጊዜው የአዴፓ መድከም ፖለቲካው ላይ የአማራ ህዝብ የሚኖረው እንዳያንስ እሰጋለሁ	0
በዋናነት ካንተ የምፈልገው ሀሳብክን ነው ሁሌም በምትለቃቸው ሀሳቦች እየተደመምኩ ነውግን አንተ ማነህ	0
በእርግጠኝነት ተስፋ አደርጋለሁ ምን ማለት ይሆን	0
እፎይ እኔ ደሞ የተለመደ እዬዬአችሁን ትቀጥላላችሁ መጠራጠር ባህላቹ ስለሆነ እንደዚህ የተደረገው እንደዚህ ስለሆነ ነው እያላችሁ በመንጫጫት ፌስቡኩን ለቅሶ ቤት ታረጉታላችሁ ብዬ ሰግቼ ነበር ትንሽ እረፍት ማድረግ ለጤናም ጥሩ ነው	0
አቶ ገዱ ጥሩ ዲፕሎማት እንደሚዎጣዉ ተስፋ እናደርጋለን እንዲሳካልወት እንመኛለን ማንኛዉንም እገዛም እናደርጋለን ለአቶ ለማም መልካም አድል	0
ሁንም ትኩረት ለኦነግ ለአቶ ገዱ መልካም እድል	0
ላይክስ አይበድል ትላለች አያቴ ግን ግን የመከላከያ ጉዳይ ሊታሰብበት ይገባል	0
ወደፊት ለጥሩም ይሁን ለመጥፎ መከላከያው መሪ ተዋናኝ ስለሆነ የባሰ ነገር እንኳን ቢመጣ የአልበሽር ነገር እንዳይገጥመው ይመስላል	0
ምን አልባትም የኦነግን አገር አፍራሽ ክንፍ በራሳቸው ሰው ሊያፀዱት ፈልገው ከሆነ ሌላም ሌላም	0
ዋናዉ አሰተዋይ የተረጋጋ ጥሩግንኙነት ያለዉ በመሆኑ ከማንም በተሻለ ይሰራል ብዬ አምናለሁ ሰዩም መሰፍን እና ወርቅነህ እንካን መርቶል አይደል እንዴ ሌባ እንካን መርቶል ይሄን መሰርያቤት እንካን አቶ ገዱ ይቅርና	0
መልካም የስራ ዘመን ለሁለቱም እየተመኘሁ አቶገዱ ለመላው ኢትዮጵያዊ መልካም እንደሚሰሩ አልጠራጠርም አቶ ለማ ግን ወደመንደራቸው ባያዳሉ ጦሩን ኢትዮጵያዊ ቢያደርጉት ከዘር ቢያወጡት ደስ ይላል	0
የእኔ ደግሞ ፍራቻዬ የክልል መስተዳድር እያሉ	0
በ ቅማንት እና የአማራ ህዝብን አስመልክተው የሰጡት ሁለት አፍነት	0
የ አማራን መሬት ግጨውን ፈርመው ለ ትግራይ መስጠታቸው በ አዲሱ ስልጣንም መተማን ጠቅለው ለ ሱዳን ያለ መስጠታቸው አሳስቦኛል	0
እኔ ግን ምንሆናችሁ ነው መልካም የስራ ግዜ ገዱ ለማ ያማራን ህዝብ ተደራጅተው ያስገደሉ እናንተስ ገናያማራው ስቃይ የገባችሁ አልመሰለኝም	0
እንካን ደስ አለወት እናግዛለን ምንም የሚከብድ ነገር የለውም	0
አንተም በርታ ክንደ	0
ጥሩነው አማራ አታስከዚህ በኀላ የአንድ የቢሄር የበላይነት ኢትዮጲያ አታስተናግድም ተዴራጂቶ የኢትዮጲያን ፖለቲካ መከታተል ከአማራው ይጠበቃል ከዛ ውጭ ቢበርድ በእጂ ቢፈጂ በማንኪያችግር የለውም	0
የግጨውን ጉዳይ ሳስታውስ	0
ኦ ኦ ይኼ ሰውየ በለመደ እጁ ሌላ ፊርማ እንዳያስቀምጥ ፍሩልኝ ኧረ እባካችሁ አታሳቅቁን	0
አንተ ትሻለኛለህ እይታህ ጥሩ ነው	0
መልካም የስራ ዘመን ይሁንልህ ከዳችን አደራ ለና አመት የተሰራብን ደባ አሁንም አንዳይደገምብን ከፈጣሪ በታች በጋራ ጠብቁን የፍጥረታት ጌታ አንተም አትርሳን አሜን	0
ለማ መገርሳ መከላከያ ይገባው ነበር ምንም አስተያየት የለህም	0
ጥሩ እይታ ነው	0
የገዱ እና የለማ ሹመት ቅድመ ግምት ነበረኝ ጠሚ አችን እነኝ ሰወች ወደስልጣን ማምጣቱ ጥሩ ገፅታ ያለው ይመስለኛል እናም መልካም የስራ ዘመን ይሁንላቸው	0
አቶ ገዱ በርታ ከጎንህ ነን የአማራ ህዝቦች	0
ሀገሪቷ ብጥብጥ ካሰጋት ለማ መገርሳ ዶክተር አብይን ገልብጠው ወታደራዊ	0
የሽግግር መንግስት ያቋቁማሉ ይኸው ነው	0
የውጭ ጉዳይ ሚኒስትርነቱን ጉዳይ አሳክተሀል እስኪ ደሞ ትንሽ አየር ውሰድና የጠሚዶውን ቦታ	0
መልካም የስራ ዘመን እመኛለሁ	0
ለቆቻችንን እባክህ ምከርልንአንተን ብቻ ቢሰሙ በደንብ ይሻሻላሉ	0
አረ አትስቀን	0
የተከበሩ አቶ ገዱ አንዳርጋቸው መልካም የስራ ዘመን ይሁንለዎት	0
እናግዛለንይሄው ነው	0
ገዱ የተረጋጋ ነው ለቦታው ከበቂ በላይ ነው መልካም የስራ ግዜ ይሁን	0
ሁለት ታላላቅ መሪዎችመልካም የስራ ዘመን ይሁንላቸው	0
ሚኪ አንተ ግን ድንቅ ፖለቲካ አዋቂ ነህ	0
አቶ ገዱ አንዲረጋቸዉ መልካም የሰራ ዘመን	0
ምን መሰራት እንዲበዎት ___	0
እናከብርሀለን	0
እንወድሀለን	0
ንኳን ውጭ ሀገር ሆንኩ	0
ጉዳየን በአቶ ገዱ አስፈፅማለሁ	0
እደተመኘሁት አገኘሁትመልካም የስራ ዘመን	0
መልካም የስራ ዘመን ለክቡር አቶ ገዱ አዳርጋቸው	0
ሚኪ እናመሰግናለን	0
አረ ሚኪ ሰለዚህ ጉዳ በፓርላማው በኩል ባእዴን ጥያቄ እንዲያነሱ ጫና ይፈጠር	0
የሶማሌዉ ክልል ፕሬዝደንት ሙስጠፋ እጅግ ጥሩ ሰዉ ነዉ	0
ፕሮግረሲቭ እና ጤናማ የሆነ የፖለቲካ ስርአት አራማጅ ለመሆኑ ከሚናገራቸዉ ንግግሮች ማየት ይቻላል	0
ይህ ምናልባትም ወደ ዳር ተገፍቶ ለነበረዉ ለሶማሌ ህዝብ ትልቅ እድል ነዉ ከዛም አልፎ ለኢትዮጵያ ህዝብም እንደዚህ ሁሉን በእኩልነት የሚያይ ሰዉ አስፈላጊ ነዉ	0
ሰሞኑን ባህርዳር መጥቶ ስለ አማራ ህዝብ የተናገረዉ ነገርም አስደሳች ነዉ	0
በዚህም ብዙ አክቲቪስቶች ሲያሞግሱት አይቻለዉ ሰዉየዉም ይገባዋል	0
ዶር አምባቸዉ የአማራ ህዝብ በሀገሩ ላይ ቀና ብሎ እንዲሄድ ሁሉንም መስዋትነት እንከፍላለን	0
ህዝብን በጅምላ እየፈረጀ የሚሄድ ፖለቲካ ድርጅትም ሆነ ግለሰብ ከዚህ ሊቆጠብ እንደሚገባ እና የአማራ ህዝብ ለኢትዮጵያ የዋለዉን ዉለታ ማስታወስ ሲገባ ባላደረዉ ነገር የዉሸት ትርክት እየተነዛ የሚሄድ ፖለቲካ እዚህ ላይ ያበቃል ህገመንግስት የሚባለዉ መስተካከል ግዴታ ነዉ ከዚህ በኋላ የአማራን ህዝብ የሚጎዳ አንዳች ነገር ካደረግን ጠይቁን ልጆቻችሁ ነን	0
ያለፈዉ ይበቃል እያለ እንኳን እኒህ በስሜት የፏለሉ ተከታይ ስላገኙ ብቻ በፊስቡክ የአማራ ህዝብ መሪ ነን ብለዉ የሚያስቡ ጮርቃ ልጆች ህዝቡን ሲያወናብዱበት ነበር	0
በእኛ ፖለቲካ ዉስጥ ትልቁ ችግሩ የራስህን መሪ ማጣጣል እና ከፍ ሲልም ማጠጥፋት ዋነኛ ተግባር ሁኗል	0
እኔ እንደሚመስለኝ እኒህ አክቲቪስት ተብየወች ሳያስቡት መሪ የሆኑ መስላቸዉ እና ከአማራ ዉስጥ አንድ ደህና መሪ ሲመጣ እነሱን የሚገዳደር የሚመስላቸዉ ሰወች ናቸዉ	0
ትቂት እስክታድግ የኔ ጀግና የኔ መሪ ይሉህ እና እየበለጥካቸዉ የሄድክ የመሰላቸዉ ጊዜ ሰይፋቸዉን ይመዙብሀል አሉባልታ ያስወሩብሀል አዲስ አካዉንት ከፍተዉ አንተ ላይ ይዘምታሉ	0
በፖለቲካ መሪዎች ብቻ አይደለም በዚሁ በፌስቡክ ጓደኞቻቸዉ ላይ ሁሉ ነዉ	0
እኒህ ሰዎች አእምሯቸዉ የሚነግራቸዉ የአማራ ህዝብ መሪ እንደሆኑ እና ተሰሚነት ይቀንስብናል ብለዉ የሚያስቡትን ደህና ሰዉ እንዲጠፋ ይጥራሉ	0
በሚፅፉት እና በሚያደርጉት ነገር ሰፊዉን የአማራ ህዝብ እንዴት እንደሚጎዳ አያስቡም ቢያዉቁትም እራሱ የግልፍላጎታቸዉን ከሟላላቸዉ የአማራ ህዝብ ጉዳያቸዉ አይደለም	0
የአማራ ፖለተካ የቀን ተቀን ለቅሶ የአሉባልታ የስድብ እና ከእዉቀት ነፃ በሆነ መንገድ እንዲጓዝ ያበረከትን ብዙ ሰዉች አለን አንዳንድ ሰወች የአማራን ፖለቲካ እንዲመሩ ታግለዉ እንዲያታግሉ እድሉ ተሰቷቸዉ ሚዲያ ሁሉ አግኝተዉ ነገር ግን አቅም አጥሯቸዉ ፖለቲካችን እንኳን ሊመሩት በጥባጭ ሆኑ	0
ሰወች የሚናገሯትን ወይም ከሚፅፉት ዉስጥ ሁለት ዘለላ በማዉጣት በእርሷ ላይ አንድ እና ሁለት መፅሀፍ እየጠቀስክ ክሪቲሳይዝ ከማድረግ የዘለለ አንዳች የአማራን ህዝብ ወደፊት የሚያራምድ እና የኢኮኖሚ እና ፖለቲካዊ ጥቅሙን የሚያስጠብቅ ስትራቴጅ ወይም ከቀዉስ መዉጫ መንገድ ሲናገሩ እና ሲፅፉ አታዩም የማያደርጉ ፖለቲከኞች እና አክቲቪስቶች የሚገርመዉ ተከታዮቻቸዉ የኔ ጀግና እያሉ የሚያሞግሷቸዉ ናቸዉ	0
በባለፉት እና አመታት ስለ አማራ ፖለቲካ ስንጮህ የባለሀብት ስም እያነሳን እከሌን እንዲህ አድርጉ ወይም እንዲህ አታድርጉ ያልነበት ወቅት ትዝ አይለኝም	0
በቅርብ ጊዜ ግን የአማራ ህዝብን ዋና ዋና አጀንዳ ትተን በአክቲቪዝሙ ዉስጥ ስለባለሀብት የምንፅፍ እና የምንናገር ሞልተናል በእርግጥ በእነዚህ ሰወች ገንዘብ እርዳታ የሚኖሩ እናዉቃለን እነሱ ባካባቢዉ ባይኖሩ እንኳን ቤተሰቦቻቸዉን እንደሚደጉሙ እናዉቃለን አንዳንዱ አክቲቪዝሙን ቢዝነስ አድርጎት የአማራን ህዝብ አጀንዳ ትቶ ሲለምንበት ሲጋበዝበት እናያለን	0
እኒህንም ጭፍን ተከታዩ የኔ ጅግና ይላቸዋል	0
ፐርፌከት መሪ እንደማይገኝ ነገር ግን የተገኘዉን መሪ እያገዙ ጠንካራ መሪ ማድረግ እንደሚቻል ብዙ ጊዜ እዚህ ፕላትፎርም ላይ ተነጋግረናል	0
ፖለቲካ አንዳች ነገር የማናዉቅ ነገር ግን ከእኛ በላይ ፖለቲካ ላሳር ነዉ ብለን የአማራ ፖለቲካ ቅርፅ አልባ እና የተወላገደ አካሄድ እንዲሄድ አድርጎታል ትምህርቱን ሳይጨርስ በሞያሌ በጅቡቲበሊቢያ አድርጎ አዉሮፓ የአረብ ሀገራት ካናዳ እና አሜሪካ ሁኖ ራሱን ሳያበቃ የቀን ስራ እና የቤት ስራ እየሰራ የአማራን ህዝብ ፖለቲካ እመራለዉ የሚል ብዙ ሰዉ ነዉ ያለዉ ፖለቲካ የሚመራዉ በኢሊቶች ኢኮኖሚክስ ባጠኑ ህግ ባጠኑ ህክምና ባጠኑ ፖሊሲ ባጠኑ ሶስዮሎጅ ባጠኑ ኢንጅነሪንግ ባጠኑ ባዮ ሜዲካል ሳይነስ ባጠኑ አንትሮፖሎጅ ባጠኑ ስነ መንግስት ባጠኑ እና በመሳሰሉት ኢሊቶች ይመራል እንጅ ገና አይደለም ትልቁን የአማራን ህዝብ ፖለቲካ እና…	0
በነገራችን ላይ እድሜህ አመት እና ከዚያ በላይ ሁኖህ የሰዉ ቤት የምትጠርግ ከሆነ የቀን ስራ የምትሰራ ከሆነ እራስህን አለወጥክም ማለት ነዉ እራሱን ያልቻለ እና እራሱን ያላበለፀገ ወይም ያለወጠ ሰዉ ደግሞ እነ አፄ ፋሲልአፄ ምኒልክ እነ አፄ ቴወድሮስ እነ አክሊሉ ሀባተወልድ እቴጌ ጣይቱ የመሩትን ፖለቲካ መምራት አይደለም ማሰቡ እራሱ ሀጢያት ነዉ መጀመሪያ እራስህን ለዉጥ	0
አንዳንዶች ደግሞ በስድብ ለዉጥ ይመጣ ይመስል ኢንተርኔት ዉስጥ ገብቶ ሲሰዳደቡ መዋልን ስራየ ብለዉ የያዙ አሉ እኒህ ሰወች ልጆቻችን ወይም ቤተሰቦቻችን አንኳን ምን ይሉን አይሉም	0
አንዳንዶች በሚገርም ሁኔታ የዩኒቨርስቲ አስተማሪዎች ናቸዉ እዚህ ሶሻል ሚዲያ ላይ በሚያሳፍር ሁኔታ ሲሳደቡ የሚዉሉት	0
እንደ ሙሁር የአማራን ፖለቲካ መስመሩን የማስያዝ ስራ ከመስራት ይልቅ በሚያሸማቅቅ መልኩ እርስ በርስም ሆነ ሌላዉ ጋር ወረደዉ ሲሰዳደቡ ይታያሉ እኒህ ሰዎች አንዲት መፅሀፍ እንኳን አለማንበባቸዉ የሚታወቀዉ የሚፅፉት እና የሚናገሩት ሀሳብ ዋና ምስክር ነዉ	0
አንዳንዱ ለጠላት ዱላ በመሆን የአማራን ህዝብ በማወናበድ የተጠመዱ ናቸዉ አንዳንዶቹ የአማራ ህዝብ አክቲቪስቶች ሳይሆኑ የግለሰቦች የሆነች ጎጥ የሆነ ባለሀብት አክቲቪስቶች ናቸዉ እኒህም ጀግኖች ሁነዉ ይወደሳሉ	0
እንዲህ ዉጥንቅጡ በወጣ ፖለቲካ ዉስጥ ስንነሳ ይዘናቸዉ የተነሳናቸዉ ዋና ዋና የአማራ ፖለቲካ አጀንዳወች አሁን እንኳን ልናስታዉሳቸዉ ጭራሽ በራሳችን ህዝብ ላይ አዳዲስ አጀንዳ በመክፈት አንድነቱን በመፈታተን ያለንንም ልናጣዉ ምንም አልቀረንም	0
ሰሞኑን የምናየዉ የሄን ነዉ የወያኔን የመከፋፈል አባዜ ሲቃዎም ለኖረ ሰዉ እስኪ ወርዶ በጎጥ እና በጥቅም ሲናቆሩ መዋል ምን ይባላል	0
የአማራ ፖለቲካ ከስደተኛ ትቂቶችን አይመለከትም ከቀን ሰራተኛ ከ ኛ ክፍል ባግባቡ ካልጨረሱ ካልተማሩ ከጎጠኛ ከአሉባልተኛ ከሸረኛ እራሱን መሪ አድርጎ ከሾመ ከስቶር ሰራተኛ እጅ ፈልቅቀን አዉጥተን የአማራን ህዝብ አጀንዳ ብሎ ቆጥሮ ተጨባጭ ለዉጥ በሚያመጡ ሰዎች ካልተያዘ ነገሩ ሁሉ ከባድ ነዉ	0
በተለይ በተለይ ፖለቲካዉን ከህፃናት እጅ እና ከሰነፍ ፖለቲከኞች ቀስ አድርጎ አታሎ መቀማት ያስፈልጋል	0
የአማራን ህዝብ ተስፋ በሚሰጥ መልኩ በስትራቴጅ የታጀበ ራእይ ባላቸዉ ሰወች እና ራቅ አድርገዉ በሚያስቡ ጊዚያዊ ወጀብ በማያንገዳግዳቸዉ ሰወች ካልተያዘ የካብነዉ ካብ ሁሉ እየፈረሰ ጭራሽ ወደማንወጣዉ አዘቅት ዉስጥ እንገባለን እየገባንም ነዉ ቢሰቀጥጥህም ይሄን ትዝብት ዋጥ ከማድረግ ዉጭ ሌላ አማራጭ የለህም ዝም እየተባለ የህዝባችን ህለዉና አደጋ ዉስጥ እየገባ ነዉ	0
በተለይ በተግደርዳሪ የፖለቲካ ሀይሎች ዘንድ ያለዉ ዝግጁነት እና የፖለቲካ አጀንዳ የበላይነት ከእኛ ድክመት የመጣ መሆኑ እና አሁንም በዚሁ ድክመት ከቀጠልን በህዝባችን ላይ ከፍተኛ አደጋ የምንደቀን መሆኑ ታዉቆበት ፖለቲካዉን እንዘዉራለን የምትሉ ሰዎችም እራሳችሁን ገምግሙ ተከታይ የሆናችሁ ሰዎችም የእዉነት እኒህ ሰዎች ከአንዱ የፖለቲካ ምእራፍ ወደ ሌላኛዉ የሚያሻግር ስብእና ክህሎት ዝግጁነት እና ቁርጠኝነት አላቸዉ ወይ ብሎ መገምገም ወሳንኝነት አለዉ ዝምብሎ እንደ በግ መንጋ መግተልተልን ማቆም አለብን	0
የራሳችን ሰወች እንደ ሽንኩርት በጎጥ ሳይሸነሽኑን ሀይ ልንላቸዉ ይገባል	0
አምጠህ አምጠህ የምትለወደው እኮ ሀሳብ ብቻ ሳይሆን ተመዘግዛጊ ሚሳይል ጭምር ነው	0
እኔማ ምክርህን ሰምቸ ሪታየር አድርጊያለሁ	0
አየህ ሚኪዬ በአንተ ያለኝ እምነት ልክ ነው በአጠቃላይ የአማራ ትግል መሪ ያስፈልገዋል የምለው ለዚህ ነው	0
አሁንም ካለምንም ማቅማማት አንተና የተወሰኑ ሰዎችን አንተ የምትተማመንባቸውን ወደፊት በማውጣጥ ሳይበሩን መቆጣጠር የግድ ነው ሌላው በራሱ ጊዜ ይሟሽሻል	0
ይህ የዘገየ ሆኖ ትላንት ዋጋ ያስከፈለን ቢሆንም እጅግ አስፈላጊ ምክር ነው መራራ ሀቅም ነው	0
እራሴን ከ ማራቅ የመረጥኩት አቅሙ ችሎታው እውቀትና ጥበቡ እንደሌለኘ ድክመቴን አውቄአለሁ እራሴን በእውቀት ስኬትና ስነምግባር እስካንፅ ብዙ ማለትን አልሻምና ነው	0
ቦታውን ለሙሁራን መልቀቅ ያስፈልጋል አቅምን አውቆ መኖር ጥሩ ነው ታላቅ ችሎታ ነው	0
እኔ ደግሞ አጀንዳ የሚያደርጉ እና የፖለቲካ ስርአቱን በመስመር የሚመሩ አክቲቪስቶችን ከፊት ማውጣት አለብን ብዬ አምናለሁ	0
አማኑኤል አብነት ሙሉቀን ተስፋዉ ሄኖክ የሽጥላ የዚ ሁሉ ተጠያቂ ናቸዉ	0
ብራዘር አፍህን ስትከፍት ተጠንቅቀህ ይሁን እድሜ ለወያኔ ስርአት እራሱ እስኪመለጥ ዩኒቨርሲቲ ገብቶ የተማረዉ ወጣት ሀይል በተለይ አማራዉ የቀን ሰራተኛ ስቶር ሰራተኛዘበኛአለፍ ሲልም ኮብል እስቶን ጠራቢ ሆኖ ነገን በተስፋ እየጠበቀ እንደ ቻይና ጃኬት ጭንቅላታቸዉ ፌድ ባደረገ ሰዎች እየተመሩ እንደሚኖሩ እወቅ	0
ከገለፅከው በላይ አሳፋሪ አድርባይነት የተጠናወታቸው እሪያዎች የተሰባሰቡት ብአዴንህ ነው	0
ብዙ ብለናልና ምንም ብታሽሞነሙናት ብአዴን አሳማነቷን አትቀይርም	0
በየጉራንጉሩ የሚገዛ እንደ ትት መመዘኛ ከተወሰደ የዘረዘርከው ሁሉ ትክክል ነው	0
ዘመኑ የሶሻል ሚድያ ዘመን ነው	0
ልሂቃን በዲግሪዎቻቸው የሚከበሩበት የሚሰሙበት ጊዜ አደለም ያ ወቅት አልፏል	0
በሀሳብ ትግል አድርጎ ሁሉም ቦታውን እንዲይዝ ማድረግ ግን ያስፈልጋል ሁሉም ሀሳብ አመንጪ እንሆን አይችልም ሀሳብ ያለው ህዝብ ማደራጀት ከሚችለው ይለያል ሁለቱም አብረው መስራት ግን አለባቸው	0
አረብ ሀገርም ሆነ ሌላው አለም ያለው ዲያስፓራ ትግሉን እንዴት ይርዳ እንዴት	0
ከሙሁራን ተብዮዎች አልተማረም የምትሉት አርሶአደርና ታች ያለው ወጣት ለአማራ ይጠቅማሉ	0
የወደፊት ተስፋዎቻችንም እነሱ ብቻ ሙሁር ተብየዎችንማ አየናቸውኮ ሆዳቸው ከሞላ ጥሩ ደመዎዝ ካገኙ ህዝቡን ዙረው አያዩትም የችግር ጊዜ ተደብቀው በሰላም ጊዜ አርበኛ ይሆናሉ	0
ሙሁርነት ማለት ሀገር ችግር ላይ ስትወድቅ መፍትሄ አመንጭ ነበር ግን የለም	0
ባብዛኛው ጥሩ ምክረ ሀሳብ ነው ትንሽ ዘለፋው በዛ እንጅ አውቆ ደደብ የሚሆን የለምከተወሰኑት ውጭ	0
ሚኪዬ ደስ የሚል ሀሳብ ነውየአማራ ፖለቲካ በኢሊቶች ሊመራ ይገባል	0
ሚኪዬ እነዚህ ራሳቸዉን የቆለሎ አክቲቪስት ተብዬዎች ናቸዉ ዋጋ ያስከፈሉን ዶር አምባቸዉን የመሰለ መሪ ከዚህ በኀላ ለመዉለድ አመታትን ፋዳ እናያለን ሰዉ አክባሪነቱ ዝቅ ማለቱ ኢኮነሚያዊ ፓለቲካዉ እዉቀቱ ድፋረቱ በ ወር ወርዶ የሰራዉ ህዝቡን አንድ የማድረግ ሰራዉ ማጣት የሌሉብንን አመራሮች ነዉ ያጣነዉ እነዚህ አክቲቪስት ተብያ ለራሳቸዉ ክብር የሚጨነቁ ጎጠኞች ሀይ ቢባሉ ጥሩ	0
ይህ ተግሳፅህ ከመዘግየቱ በስተቀር ምንም እንከን አይወጣለትም ፈጣሪ በልቦናችን ይጣፍልን	0
አፌ ቁርጥ ይበልልህ አቦ	0
ሚኪ ትክክለኛ ትዝብት ነውና	0
አንድ የማነሳው ሀሳብ የአክቲቪስቶች ፎረም አይነት በየመንፈቁ ወይም አመቱ ወይም እንዳመቸ ለምን አይደረግም ጥናታዊ ፅሁፎች የሚቀርቡበት የአክቲቪዝሙ ግብ ስትራቴጅዎች ታክቲኮች አቅጣጫ የሚደረግባቸው	0
እንደ አማራ ህዝብ ተጭነውን የከረሙቡን የበደል ሸክሞች የወጉን ና ያደሙን አገራዊ ፖለቲካዊ እሾኮችና ጎርባጣዎች ገና አንዱ እንኳን አልተነቀለም ከትክሻችን ፈቀቅም አላለም	0
ለውጥ ለውጥ የተባለውም ገና አመት እንኳን የከረመ ሁሉ እየታዘበው ነው	0
የአማራነት ችግሮቻችን በሁሉም አማራ ላይ ተፅኖ አላቸው ህመሙ ሁሉንም ይሰማዋል	0
እናም መፍትሄውም ከሁሉም ከሆነ ነው	0
ሚኪዬ ብዙ ጊዜ በአስደማሚ አርቲክሎችህ ተደምሚያለሁ ብስለትህ ስክነትህ የታላቁን የአማራ ህዝብ ስነ ልቦና ማወቅህ ከሌሎች ለየት ያደርጋሀል	0
የዚህን ታላቅ ህዝብ መሪነት እንዲሁ በቀላሉ ለአላዋቂዎችና በስሜት ለሚጋልቡ ግለሰቦች መስጠት ክስረት ነው ይህ ክስረት እንዳይመጣ እንደዛሬው አይነት ቆፍጠን ያለ አርቲክል ያስፈልጋል	0
አሁን ደህና አድርጎ ገብቶሀልጀብደኝነትባዶ ፉከራ ምንም አይጠቅምም አይታወቅህም እንጂ አንተ ራስህ ችግር አለብህ	0
ድንቅ ፅሁፍ ተባረክ ለብዙዎች የሚጎረብጥ እውነት የአዋቂነት መለኪያው ራስን ማወቅ ነውና እያንዳንዱ እውቀቱን መዝኖ በአቅሙ እንዲሰለፍ እና በፌስቡክ ዝና መረን የለቀቁትን ስቅጥጥ የሚያደርግ መልካም ምክር ነው	0
ችግሩ ምክሩን መቀበል ትተን እዚሁ ባንተው መድረክ ከአይናችን ያለውን ግንድ ሳናነሳ የሌላውን ሰው ጉድፍ ልንጠርግ ዳዳን	0
ልታዘብከንም የፅሁፍክን አላማ የምታውቀው አንተ ምን እያልክ ይሆን እስኪ በዚሁ ላይ ያየኸውን ትዝብት ፃፈው ጆሮ ለባለቤቱ ባዳ ነው አላልክም ይሆን	0
በቃ ምን ልበል	0
አንተ ብቻ ኑር አቦ	0
ሌላው የአተር ገለባ ነው	0
ዝምብሎ እንደ በግ	0
መንጋ መግተልተልን ማቆም አለብን የራሳችን	0
ምክሩ መልካም ነው ሚኪ በተለይ ለበይሰሞኑ ጎጠኞች እና ተንባዬች ቆንጠጥ ያደርጋል	0
ግን ሚኪ ማንኛውም ስራ ሆነ የትምርት ደረጃ ለባለቤቱ ዋጋ አለው ተማርን ያሉት ነው አገራችን በረዶ ያረጎቶ ለማንኛውም በነካው ሀሳብህ ሁሉም ባለው አቅምና እውቀት አገሩን ወገኑን እንዲረዳና ትክክለኛ ለውጥእንዲመጣ እንዲህ በብስጭት ሳይሆን በድሮዋ ታጋሽነትህ አስተማሪነትህ እንጠብቃለን በርታ	0
አንተ አልነበክ	0
አንተም ወደ ልቡናህ ከተመለስክ መልካም ነው እዚሁ ፌቡ አንተም እገሌ ይውረድ እገሌ ይውጣ ስትል ነበር ማስተዋል መቻልህ ጥሩ ነው	0
በጣም ጥሩ ሀሳብ ነው ሌላው የረሳኸው አዴፓን ችግር ነው አደፓ ውስጥ እነዚህ ችገሮች ይታዩኛል ቡድንተኝነት በወስጥ የተደረገው ሁሉ ለመደሩ የሚያሾልክ ሁልጊዜ ቀሰቅሱኝከአማራ ህዝብ ጥቅም በላይ ለኢትዮጵያ መጨነቅ ቁርጠኝነት ማጣት ታች ያሉ የድሮ የበረከት እና የዲሱ ጅሬዎች ያለማሰወገድ	0
ይኸው ነው	0
ለሀገሩ የሚያስብ ለወገኑ የሚቆረቆር እንደዚህ ነው	0
ሞጣ ቀራኒዮመኮንን አማረዮኒ ማኛ ኸረ መአት ናቸው	0
ከአንተ ትዝብት በላይ ያስደነቁኝ ኮሜንቶቹ ናቸው ብዙ ኮሜንት አድራጊውችን ስታይ ትዝብቱ ምክሩ ለማን እንደሆነ ግራ ትጋባለህ	0
በዚህ አጋጣሚ ግን ትዝብትህን ተቀብያለው ነገር ግን ስለ ዶር አምባቸው አንተም መጀመሪያ አድንቀህ በሗላ ከወራት በሗላ ግን አጣጥለህ መፃፍህን ታስታውሳለህ	0
ኮመንትም እንዳልሰጥ የምታደርግ ቡጢ ናት ይችህ ለኔ እናመሰግናለን ለታልቅ ምክርህ ተከታይ የሚከተለውን መምረጥ አለበት ትልቅ ነገር ነው	0
አክቲቪዝም እንዲህ ሲሆን ተባብረን እናድጋለን አሁን ስትራቴጂ ወደመንደፍ አመስግኛለው በርታ	0
መራራ ሀቅ ነው የውጋውፍለጠውአውርደውስቀለው አክቲቪዝም መቀየር አለበት	0
ሰማይ ተቀደደቢሉት ተውት ሽማግሌ ይሰፈዋል አለ ይባላል	0
በነገራችን ላይ ሚኪ እስከማውቀው የአክቲቪዝሙ ስታንዳርድ ነውትእቢትን አርቃችሁ በትህትና ብትሰሙት ራሳችሁን ህዝብንም ታድኑ ዘንድ አላችሁ	0
ሙስጠፌ ኡመር ሀገሪቷ ላይ ካሉት የኢህአዴግ አመራሮችም ይሁን ተቃዋሚ ነን ከሚሉትም ወገኖች በጣም የተሻለ ጥሩ መሪ ነው	0
ለአማራ ህዝብም ይሁን ፖለቲካ ግን መድሀኒቱ አማራ እና አማራነት ብቻ ነው	0
ከአማራ ፖለቲከኛ ጎበዝ ነህግን አማራን ከሚገባው በላይ ታጋነዋለህይህ አመለካከት ሌሎችን ሀይል ናት ጉልበት በትክክል እንዳትረዳ ያደርጋል	0
እውነት ነው በየሜዳው ስሙኝ ባይ እንጂ የሚሰማ ሀሳብ ይዞ ያለመቅረብ የብዙዎቹ ችግር ነው አለፍ ሲልም ስሜት ጥቅም እና ሴረኝነት ጠልፎቸዋል	0
ትክክል ነህ ሚኮ ትግላችን ተጓቷል ይሄ የሆነው ደግሞ በዋናነት የአክቲቪዝም ስራው ቅርፅ ስላሊያዘ ነው ሁሉም በየፊናው መጓዙ ነው ግማሹ የህዝብን ጥቅም በመዘንጋት ለግል ክብር ተወዳጅነት ተከታይ ማብዛት የመሳሰሉ ችግሮች ጎልተው በመውጣታቸው ነው ይሄ ህዝቡን ዋጋ አስከፍሏል	0
ሚኪ ይህንን ቅርፅ ከማሲያዝ ይልቅ ሌላ ክፍተቶችን መፍጠር ተገቢ አይደለም ከተቻለ የጋራ መድረ	0
ይህንን ዋጥ ማድረግ ነው	0
አለልህ ደግሞ የአንተን ፁህፍ ገብቶኛል ብሎ ራሱን መመርመርና ማዬት ሲገባዉ ሰዉ የሚጠቁም ወይ ደግሞ አዎ ትክክል ነህ ይላል በልቡ ሌላን ሰው እያሰበና እየጠቆመ	0
አሁንም ራሳችንን እንመርምር እኔ የቱጋ ነኝ እንበል በበኩሌ ዋጥ	0
የአማራ ፖለቲካ ከዉሪ መንጋ ወጥቶ በሙህራን ፊት መሪነት ካልተያዘ በቅርብ ጠፊ ነው	0
ክላሽ ይዞ መፎለል ግብ አድርገን የጮርቃ ፖለቲካ ማራመድ በጣም ኋላቀርነት ነውና በጊዜ መላ ይባል	0
ሚኪ በጣም ጥሩ ሀሳብ ነው ማንም ለ አማራ ህዝብ አስባለሁ የሚል አክቲቪስት ቆም ብሎ ማሰብ ያለበት ይመስለኛል አንድ ለአማራ ህዝብ ቆሜያለሁ የሚል የማህበረሰብ አንቂ ፅሁፉን ፖስት ከመደረጉ በፊት በተከታዮቹ ስነልቦና በአማራ ህዝብ አንድነት በመሰረታዊ የአማራ ህዝብ አጀንዳዎች እንዲሁም በራሱ ስነምግባር ላይ ሊኖረው የሚችለውን ጥቅም ና ጉዳት በደንብ ካላሰላሰለ ህዝብን በስሜት ከመንዳት የዘለለ ሚና ሊኖረው ይችላል ብሎ ለማሰብ ይከብዳል	0
እውነት ነው	0
ግን ይህ ለምን ሆነ	0
የኛ ሙህራንስ ሁሉም ሳይሆኑ አብዛኞቹ ተቅለስላሽ አደሉምን ከጥቂቶች በቀር አማራ ነኝ ማለትን አይፈሩም	0
ስለዚህ አቅጣጫ የሳትን በሙህራን መዘናጋት ጭምር ነው	0
አቦ ተባረክ በቃ ፈጣሪ ይጠብቅህ ወንድሜ እጅግ ከልቤ አመስግኛለሁ እጅግ እውነተኛና ሀቀኛ ምክር	0
ሚኪየ ሀሳቡን ሁሉም ተቀብሎታል ይህንንም አስተያየትችን በማንበብ መገመት ይቻላልታዲያ አንተ ለምን አትመራውም አንዳንዶችን ደግሞ ጥሩ የሆኑትንም እያበረታታህ የሚያጠፉትን እየገሰጥክ ምራው ወንድማለምአመሰግናለሁ	0
እሄው ነው	0
ሼጋ ጥሁፍ ነዉ ደርሶናል እጅህን አይቆርጥምህ ራስህን አይፍለጥህ ግን ግን ግሙን አዴፓ ንም ዉቀጥልን	0
ይ ቀለም የዘለቀው ሰውክፉ አይንካህ ከሸረኛው አብይ አይን ያውጣህ	0
አንተ ብቻህን ከ መንደር ትመጥናለህ ተባረክልንንንንንን	0
በተለይ በተለይ ፖለቲካዉን ከህፃናት እጅ እና ከሰነፍ ፖለቲከኞች ቀስ አድርጎ አታሎ መቀማት ያስፈልጋል እንዴት	0
ወዳጄ እና ልቤ ሆይ ወዴት ነህ ባለህበት ሰላምህ ይብዛ መንጌ ወጠጤ ያላቼው ሰዎች ግልገሎች ናቼው ህዝቤን የበሉት ብቻ ተባረክ	0
ሚኪየ ተባረክልኝ	0
ጥሩ ምክር ነው	0
ሸጋ እና ተገቢ	0
ትክክል ምንም እንከን የማይወጣለት ትክክለኛ እይታ አይምሮህ ይባረክ ወንድም	0
ደረቅ እውነት	0
ሚኪ አንተ እኮ ከሁሉም ተለያለህ የምልህ ለዚህ ነው	0
ይሄን ዋጥ ካላደረግን መበላታችን ነው	0
እየመረረህም ቢሆን ሀቁ ይህ ስለሆነ ተቀበለው ሚኪ ግን ቃላቶች ላንተ ብቻ ነው እንዲ እንዲታዘዙ የተደረጉት ለምን ሌላውም እንዲህ አይከትብም	0
የራሴን ውጫለሁ	0
ፈጣሪ ይጠብቅህ ተባረክ	0
ገራሚ ትዝብት ነው	0
ሚኪ እንደዚህ አርገህ አስተምራቸው ያው ከገባቸው ነው	0
ትክክል ማደርጋቸው ብዙ አሉ	0
ማይኮ ትችት ያስፈልጋግ በርታልን የኛ ብሌን	0
የራሳችንን ሰው መስራት አንችልበትም	0
ቢሰቀጥጥህም ይሄን ትዝብት ዋጥ ከማድረግ ዉጭ ሌላ አማራጭ የለህም	0
ዘይግቶም ብሆን እውነታው ስለገባ ደስ ብሎኛል አንደኛ የአማራ ፖለትካ ከአሉባልታ እና ተረት ተረት መውጣት አለበት ሁለተኛ የአማራ ፖለትከኞች አማራው ላይ በሄደበት ሁሉ በአካባቢው ካለው ህዝብ ጋር በሰላም እንዳይኖር በየቀኑ ጣላት የሚሸምቱለትንም አደብ ማስገዛት አለባችሁ	0
ሌላው እንደነዚህ በማድበስበስ ሳይሆን ጥፋተኞቹም እራሳቸውን እንዲያውቁት እከሌ ብለህ መጥራት አለብህ ባይ ነኝ	0
እንዴት አይነት ግሩም ፅሁፍ ነው በጌታ ሚኪ እንዳንተ አይነት ሰወችም ከተደበቃችሁበት ዋሻ በመውጣት መሬት ወርዳችሁ የክልሉን ፖለቲካ ከአሉባልታና ስድድብ ወጥቶ በእውቀትና በመርህ እንዲመራ ማድረግ አለባቹ አልያ ነገሮች ገና ከዚህም ይከፋሉ ሚኪሻ አንተም ይህን እውነት ዋጠው	0
ሰው ወደ ልቡ ተመልሶ መልካም መንገድ ሲያመላክትና ቀና ሀሳብ ሲያቅርብ ደስ ይላል በርታ	0
ንድነገር ያልተረዳሀቸው የሚመስለኝ የአማራ አክቲቪስቶቹን ዳር አምባቸውን የመጥላት ጉዳይ ሳይሁን	0
በትክክል መሀል ገብተው ወዴት መሄድ እንዳለበት ሳውቁ የሚቦጫረቁ አሉና ይሄንን ውሰዱት ተቀበሉት መልእክቱ ሙሉበሙሉ ትክክል ነው	0
ወቅታዊና ተገቢ ፅሁፍ ነው ከስሜት ወጥተን በስትራቴጂ መመራት መጀመር አለብን ሁሉም ሰው እራሱን ይመርመር በግሌ እራሴን እንዳይበት አድርጎኛል አክቲቪዝሙ ወጥ የሆነ አካሄድ እንዲኖረው ስንወተውት ከርመን ነበር አሁንም የሆነ አድረጃጀት ለመፍጠር ቢሞከር ጥሩ ነው ከጎረቢቶቻችን መማር አንዴትያ ቅተናል	0
ማን ማንን ይመራል የሚል አባዜ የተጠናወታቸው እርስ በርስ አይከባበሩ እየተናናቁ በጎጥ እያሰቡ ትግሉን እየተጓተቱ ስለ አማራ ሳይሆን ስለ ራሳቸው ክብር ብቻ ሚጨነቁ ራሳቸውን የሰቀሉ ሀሳብ ማይቀበሉ ለሂዳቸው ብቻ ሚገዙ እነሱን አንድ በሏቸው	0
ሌላው እርስ ብርሳቸውሁ ተነጋገሩ አንድ ሁለት ሰው ይህን የአማራን ብሄርተኝነት ቢመራው ብታደርጉ ፕሪጀክት ተነድፎ ስትራቴጅ ተይዞ በታክቲክ የሚመራ ብታደርጉት	0
እንግዲህ ሰሚ ከተገኘ ከዚህ የበለጠ ምክር የለም ሚኪ ይህን አቋም ከሚጋሩ በሳል አክቲቪስቶች ጋር በጋራ በመሆን ሰፊ ሽፋን ተሰጥቶ ቢሰራበት ህዝባችን ከገባበት ያለመደማመጥ ችግር በቶሎ ይወጣል ብዬ አምናለሁ	0
ይህን ተልእኮ ከግብ ለማድረስ አንተ የምትመራው ግሩፕ ቢፈጠርና ውይይት ቢደረግበት መልካም ነው	0
መልካምና ተገቢ እይታ ነው ነገር ግን ፅሁፋ ትንሽ ጫፍ የረገጠ ነው ለምሳሌ የፖለቲካ ተሳትፎን አስተያየት መስጠትና መፃፍን ጨምሮ በትምህርት ደረጃ እና ራስን ከመቻልና አለመቻል ጋር በምትሰራው ስራ አንፃር የመዘንክበት አግባብ ተገቢ ነው ብዬ አላስብም አሁን ያለንበት የፖለቲካ ችግር ከመማር አለመማር ወይም ከልምድ ማነስ ጋር የተያያዘ አይደለም	0
የሙስጠፌ አይነት ሰው በየቦታው አንዳንድ ጣልጣል ቢደረግልን ሰላማችንን እናገኝ ነበር ለማንኛውም እግዚያብሄር ይርዳን	0
አንዳንዶቻችን ስለ ፖለቲካ አንዳች ነገር የማናዉቅ ነገር ግን ከእኛ በላይ ፖለቲካ ላሳር ነዉብለን የአማራ ፖለቲካ ቅርፅ አልባ እና የተወላገደ አካሄድ እንዲሄድ አድርጎታል	0
ትምህርቱን ሳይጨርስ በሞያሌ በጅቡቲበሊቢያአድርጎ አዉሮፓ የአረብ ሀገራት ካናዳ እና አሜሪካ ሁኖ ራሱን ሳያበቃ የቀን ስራ እና የቤት ስራ እየሰራ የአማራን ህዝብ ፖለቲካ እመራለዉየሚል ብዙ ሰዉነዉያለዉ	0
ወንድሜ ንግግሩ እበጥሩ ነው ጥሩ ሰው እንደሆንክ ሰመዉ እና አደረግሁ እስኪ ግን ከአቀንቃኝነት በዘለለ ሁኔታ ቀርበን ስለ እዉነት እንስራ የአሳዛኝ እና የቆራጥ ሰው የቴዎድሮስ ልጅ ነን ካለን እሱ ቀርቦ ስለ እዉነት ሰራ እንጂ መቼ የ አሉባልታዎች ኳኳታ መቸ ፊቱ ጋ ተፃፉ	0
በጣም የሚገርም ትዝብት ነውየውስጤን ነው የነገርክልኝ ማንኛውም አክቲቪስት ህዝቡን በሚያነቃበት ወቅት መነሻ ኖሮት መድረሻውን በትክክክ ማወቅ አለበት	0
ከግቡ ለመድረስ ደግሞ ልጓም እንደሌለው ፈረስ መጋለብ ሳይሆን የሚፅፈው ፁህፍ በእውቀት ላይ በማስረጃ ላይ ተመስርቶ በክልሉ ፖለቲካ ላይ የሚፈጥረውን አሉታዊና አወንታዊ ተፅኖ ከወዲሁኑ መወስን አለበትየገልፅካችወ አይነት አክቱቪስቶች ግን አቋም የሌላቸው በየሰአቱ እንደ ገበቴ ውሀ የሚዋልሉ ዱኩማኖች ይመስሉኛል	0
ለኔ የዛሬው ሀሳብህ ሚዛን የሚደፋ ሆኖ አግኝቸዋለሁ ችግሩ አሁን አንተን የሚያሞግሱት ሁሉ አንተ አፈር ያበላሀቸውን በሙሉጌታቸው ብዬ ስም አልጠራም ሲያወድሱ ነው የሚውሉት ያልከው ገብቷቸው ቢሆን ወይ አንተን ወይ እነ ሄኖክን ለይተው ያደንቁ ነበረ	0
አንተ ብቻ ነህ ጎበዝ ሚኪዬ በርታ ጥሩ ትዝብት ነው	0
መረራው እውነት ይህ ነው ባካችሁ እንዷቅማችን እናልም	0
ይህ ሀሳብ በቅጡ መርህ ባለበት መሬት ላይ ወርዶ እኩይ ሀሳብ ያላቸው ደካሞች ስራቸው ታይቶ ከስራቸው እንዲቆጠቡ ግንዛቤ መሰጠት አለበት ጎበዝ እራሳችን እንመርምር ይህ ነገር ወገኖቻችንና ሀገራችንን በእጅጉ እየጎዳ ነው	0
አላማቸው አሀዳዊነት መሳካት ይጠቅማል ብለው ሲያስቡ አብይን ነብይ አደረጉት ሙሴብለው ውሎ ሳያድር እንዳሰቡት መጋለብ ሳይቻላቸው ሲቀር አታለለን አሉ አሁን ተረኛው የኢማም አህመድ ኢብራሂም አልጋዚ ትውልድ የሆነው ሙስጠፌ ነው	0
ጥበበኛው ሰለሞን ብለውታል ከሰሞኑ ደግሞ ምን ይሉት ይሆን እየጠበቅን ነው በጉጉት ስናወድስም ስነናወግዝም በመርህ ይሁን	0
ፖለቲካዉን ከህፃናት እጅ እና ከሰነፍ ፖለቲከኞች ቀስ አድርጎ አታሎ መቀማት ያስፈልጋል አይይ አዴፓ ኦዴፓ እያጃጃለ ከፌደራል እያፀዳ ወደክልልህ ሲልክህ እራስን ቆልሎ ህዝብን ማንቆሸሽ መርጦል	0
ሚኪ ተባረክ የራሳችንን ቾግር መቀበል ለተሳነን ጥሩ አስተማሪ ምክር ነው የራሳችንን አመራሮች ሰድበን ለሰዳቢ ከዛም አልፎ እርስ በርስ ለማጫረስ ብዙ የራሱ የአማራው አስተዋፆ አለበት አሁን ያለፈው ይብቃ ከአዴፓ ጎን መሰለፍን ከትግራይ ህዝቦች እንማር እነርሱ ሰው በላ አመራሮቻቸውን እንዴት አቅፈው እንደያዙ	0
ለመጀመሪያ ጊዜ መጣሁ ግን በአካል የማውቅህ ሰው መሰልከኝ በተለይ ስለ የአወራሁትን ሚኪ እኔም የሚያስጨንቀኝ ይህ ነው ለማንኛውም ልብ ለ ልብ ተግባብተናል አመሰግናለሁ	0
ወይም በመርህ የሚመሩን ሰወችን እንደምንም ብላችሁ ፍጠሩልን አሁንኮ የዋና አክቲቪስቶቻችን ቁጥር እንኳን አይታወቅምኮ አዛዥ ና ታዛዥ የሌለበት አክቲቪዝም ፍሬ የለውም ስለዚህ ምርጥ መሪ በመርህ የሚመራን ብሎም ከዚህ አረንቋ የሚያሻግረን አክቲቪስት ያስፈልገናል ሌሎች መከተልን መልመድ አለባቸው ታዛዥም መኖር አለበት	0
ባክህ የአንተ ኢንጅነርትየአንተ ዶክትሬት የአንተ ፓለቲከኛነትየአንተ ምሁርነት የአማራን ህዝብ ሲያስገድለው እንጂ ሲያድነው አላየንም አባቶቻችን ነገስታቱ ሀገሪቷን በሀይማኖት በቅንነት ነው የመሯት እንጂ ተምሬያለሁ የሚለው ይሄ ከ በኋላ የተነሳ ትውልድማ ይኸው ሀገሪቷን በማያባራ ጦርነት ውስጥ ከቶአት እስከዛሬ አለች ድንቄም የተማረ ለኔ ያልተማረው ንፁሁ ገበሬ አስር እጅ ይበልጥብኛል ሀገር	0
ያገሬ ልጅ ንቃ ያገሬ ልጅ ንቂ	0
አሜሪካ ሆኖ ጯሂ ተደላቂ	0
ካርቶን ተሸካሚ ሰሀን አለቅላቂ	0
ትክክል ነው ነገር ግን እስኪ ታዋቂ የምትባሉ ሰወች በኢንቦክስ ተገናኙና የጋራ የአቋም መግለጫ አውጡ ይህም ማለት ህዝቡ እንዳይወናበድ ያግዛል	0
እኛም ማንም በአማርኛ ስለ ፃፈ የዚያ ሀሳብ አራጋቢ አንሆንም እርስ በርሳችሁ በ ቴሌግራም አልያም በሌላ ግሩፕ ቻት አድርጉ ሴክሬት አጀንዳ ቅረፁ	0
አንተ አለኸን አስተዋይና አርቆ አሳቢ ልክ ከላይ እንዳልከው ደካማና አጀንዳ የሚቀይሩና የሚያስቀይሩ አክቲቪስት ነን ባዮችን ቀስ አድርጎ መያዝና ማስተምስር አንድነት መፍጠር ላይም ስሩ ተባበሩ	0
በነገራችን ላይ እድሜህ አመት እና ከዚያ በላይ ሆኖህ የሰው ቤት የምትጠርግ ከሆነ የቀን ስራ የምትሰራ ከሆነ እራስህን አለዎጥክም ማለት ነው	0
እራሱን ያልቻለ እና ራሱን ያላበለጰገ ወይም ያለወጠ ሰው ፋሲልምኒልክጣይቱ አክሊሉሀብተወልድ የመሩትን ፖለቲካ መምራት አደለም ማሰቡ ራሱ ሀጢያት ነው በቃ ይሄው ነው እናመሰግናለን ሚኪ ራሳችንን እንፈትሽ	0
ኪ አንተና የተወሰኑ የአማራ ሙሁራን ለወገናችሁ እየሰራችሁ ሊሆን ይችላል አብዛኛው የአማራ ምሁራን ግን ፕሮፌሽናቸው ውስጥ ተወሸቀው በአድርባይነት ለግል ጥቅማቸው ከህዝቡ ጥቅም በተቃራኒ በመቆም የህዝቡን መከራ ሲያራዝሙ መማር እያለባቸው በሴራ እንዳይማሩ እራሳቸውን ሰርተው መቀየር እየቻሉ በሴራ የደኸዩ የደኸዩ የተሰደዱ ወጣቶች ላይ ትግሉ ወደቀ እ	0
የሰማነውን በእዝነ ልቡና ያሳድርብን ብቻ ነው በጣም የሚገርም ሀሳብ ነው ሚኪ ንጉሰ ነገስት ብለንሀል	0
ሌሎች ደግሞ የሚመለከታችሁ በመንደር የምተስቡ እና በባለሀብት የተጠለፋችሁ ጥንቃቄ አድርጉ	0
እውነት ነው ግን አንዳንድ ተማርን ብለው የአማራን ጥቅም አሳልፈው ከሚሰጡ ከንቱዎች ደግሞ ምንም እንኳን የትምህርት ዝግጅታቸው የተሟላም ባይሆን መለኪያው አማራነት የአማራን ጥቅም አሳልፈው የማይሰጡትን የቁርጥ ቀን ልጆችን የተማረው አካል እየመራቸው እና ሲሳቱም እየገሰፁ ባላቸው አቅምባይመሩም እየተመሩ እንዲያገለግሉ ቢሆን እና አክቲቪዚሙ ከተናጠል ወቶ በተደራጀ መልኩ ቢመራ መልካም ይመስለኛል	0
አሊያ ደግሞ አክቲቪዝሙ ርስት አይደለምና ህዝባችንን ወዲህና ወዲያ ከሚንጡ እራሳቸውን ማግለልም እንዷንድ የትግል ስልት ማየት ያሻል	0
ሚኪ ምክርህ ጥሩ ነው ነገር ግን ዶር አምባቸውን በመምጣቱ የሚከፍ ከነበረ ለአማራህዝብ ህልውናና ጥቅም አሳቢነኝ ይላል ብየ አላስብም ግና ምንዋጋለው ያለምንም ተወካይ የተፃውን ህገመንግስት ና ማንነታችንን ቆስጠን ያለ አቆም ይዞ ወደእውነቱ እንደሚሄድ እየጎጎን መቅረታችን ነው የሚያመው ፍርዱን እንጠብቃለን	0
ሉም ሰዉ የተለያየ የስራ ድርሻና ችሎታ ይኖረዋልባለበት ኢኮኖሚያዊ አሰላለፍ የፖለቲካ አንቂወችየሚያደራጁና ለአማራ ህዝብ ብልፅግና የተግባር ስምሪት የሚሰጡ በየደረጃዉ ጠንካራ አመራሮች ያስፈልጋሉሁሉም የመጣለትን ብቻ እየፃፈ አንድነታችን ተጠናክሮ ለለዉጥ መብቃት አስቸጋሪ ነዉና የተሰጠዉ ምክር በጣም ጠቃሚ ነዉበየዘርፉ አደራጅቶ መምራትን ግን ጊዜ ባይሰጠዉ	0
ከአንተ ከምስጋናው አንዷለም ከጌታቸው ሽፈራው ከየሽሀሳብ አበራ ከአብን ገፅ ከአስራት ሚድያ ከአማራ መገናኛ ብዙሀን ውጭ የሚከተል ስራ ፈት ተጨማሪ ስራ እየሰራ ራሱን በኢኮኖሚ ቢያሳድግ ይሻለዋል	0
ንስር እያታዎችህ ወደ ውጪ ብቻ ሳይሁን ወደ ውስጥም ናቸውብለሀተኛ ነህ አሳን መብላት በብልሀት ማለት እንዲህ ነው	0
[truncated: 15,513 more rows]
